# Supplementary material for: Global burden of musculoskeletal disorders and attributable factors in 204 countries and territories: a secondary analysis of the Global Burden of Disease 2019 study
Source: PubMed Central journal article supplement — BMJ Open. 2022 Jun 29;12(6):e062183. doi: 10.1136/bmjopen-2022-062183 (PMC9244680; doi:10.1136/bmjopen-2022-062183), 2022-06-29

## Supplemental Material

**Table S1.** The numbers (2019), ASRs (per 100,000 population; 2019), and AAPCs (1990-2019) in incidence, death and DALY for RA in 21 GBD regions

| Characteristic                    | Incident cases                            |                        |                     | Deaths                             |                     |                        | DALYs                                       |                                        |                        |
|-----------------------------------|-------------------------------------------|------------------------|---------------------|------------------------------------|---------------------|------------------------|---------------------------------------------|----------------------------------------|------------------------|
|                                   | Numbers<br>(95% UI)                       | ASIR<br>(95% UI)       | AAPC<br>(95% CI)    | Numbers<br>(95% UI)                | ASDR<br>(95% UI)    | AAPC<br>(95% CI)       | Numbers<br>(95% UI)                         | Age-standardized DALY rate<br>(95% UI) | AAPC<br>(95% CI)       |
| <b>Global</b>                     | 1,074,390.80<br>(975,501.75,1,179,332.46) | 13.00<br>(11.83,14.27) | 0.21<br>(0.18,0.25) | 44,408.35<br>(33,953.69,51,747.79) | 0.57<br>(0.43,0.66) | -0.37<br>(-0.54,-0.2)  | 3,262,589.14<br>(2,510,208.35,4,091,554.90) | 39.57<br>(30.51,49.53)                 | 0.02<br>(-0.05,0.09)   |
| <b>Sex</b>                        |                                           |                        |                     |                                    |                     |                        |                                             |                                        |                        |
| <b>Male</b>                       | 330,460.59<br>(298,856.18,364,426.10)     | 8.13<br>(7.38,8.94)    | 0.24<br>(0.22,0.26) | 13,832.08<br>(11,943.81,15,629.04) | 0.40<br>(0.35,0.46) | -0.40<br>(-0.59,-0.21) | 980,812.84<br>(759,988.78,1,234,948.74)     | 24.94<br>(19.42,31.31)                 | 0.03<br>(-0.07,0.14)   |
| <b>Female</b>                     | 743,930.21<br>(678,043.92,817,225.02)     | 17.80<br>(16.22,19.52) | 0.20<br>(0.14,0.26) | 30,576.27<br>(20,414.75,37,673.84) | 0.70<br>(0.47,0.86) | -0.29<br>(-0.42,-0.17) | 2,281,776.30<br>(1,727,389.39,2,875,227.64) | 53.26<br>(40.20,67.08)                 | 0.06<br>(0.01,0.10)    |
| <b>Social-demographic index</b>   |                                           |                        |                     |                                    |                     |                        |                                             |                                        |                        |
| <b>Low</b>                        | 89,688.13<br>(80,771.34,99,448.31)        | 12.61<br>(11.43,13.87) | 0.21<br>(0.14,0.29) | 2,897.35<br>(1,860.52,3,521.11)    | 0.72<br>(0.46,0.88) | 0.16<br>(-0.06,0.38)   | 222,421.67<br>(169,707.17,283,475.75)       | 38.07<br>(29.29,47.88)                 | 0.27<br>(0.17,0.37)    |
| <b>Low middle</b>                 | 241,655.22<br>(219,310.74,265,888.62)     | 15.26<br>(13.85,16.79) | 0.32<br>(0.3,0.35)  | 12,156.71<br>(8,079.66,14,871.11)  | 1.06<br>(0.70,1.30) | 0.4<br>(0,0.8)         | 691,109.87<br>(535,276.39,858,365.36)       | 48.38<br>(37.95,59.54)                 | 0.36<br>(0.22,0.51)    |
| <b>Middle</b>                     | 297,488.69<br>(268,325.64,329,405.71)     | 11.19<br>(10.14,12.37) | 0.17<br>(0.07,0.27) | 12,703.38<br>(9,985.64,15,126.42)  | 0.60<br>(0.47,0.71) | 0.15<br>(-0.11,0.4)    | 966,741.26<br>(743,565.39,1,219,446.23)     | 37.61<br>(29.11,47.14)                 | 0.17<br>(0.1,0.25)     |
| <b>Middle high</b>                | 198,917.07<br>(179,744.16,218,851.52)     | 11.23<br>(10.23,12.37) | 0.34<br>(0.32,0.37) | 7,851.06<br>(6,226.84,9,818.47)    | 0.39<br>(0.31,0.49) | -0.35<br>(-0.51,-0.18) | 675,069.15<br>(508,138.30,859,496.72)       | 35.01<br>(26.33,44.52)                 | 0.06<br>(-0.02,0.14)   |
| <b>High</b>                       | 232,587.21<br>(214,481.50,252,314.67)     | 17.13<br>(15.77,18.61) | 0.25<br>(0.22,0.28) | 8,785.85<br>(6,069.53,11,618.27)   | 0.42<br>(0.30,0.57) | -1.74<br>(-1.82,-1.66) | 705,955.96<br>(525,042.85,897,160.63)       | 45.02<br>(33.28,57.74)                 | -0.19<br>(-0.25,-0.12) |
| <b>Region</b>                     |                                           |                        |                     |                                    |                     |                        |                                             |                                        |                        |
| <b>Andean Latin America</b>       | 9,218.46<br>(8,173.27,10,464.32)          | 14.74<br>(13.16,16.62) | 1.35<br>(1.33,1.37) | 330.49<br>(225.77,413.26)          | 0.62<br>(0.42,0.77) | -0.62<br>(-0.94,-0.3)  | 27,408.69<br>(20,251.53,35,421.57)          | 46.17<br>(34.27,59.10)                 | 0.92<br>(0.83,1.02)    |
| <b>Australasia</b>                | 7,968.43<br>(7,148.80,8,850.94)           | 20.89<br>(18.75,23.34) | 0.28<br>(0.19,0.36) | 304.24<br>(210.26,414.87)          | 0.57<br>(0.40,0.78) | -1.9<br>(-2.07,-1.73)  | 22,917.73<br>(17,018.69,29,415.15)          | 52.75<br>(38.71,68.08)                 | -0.24<br>(-0.33,-0.16) |
| <b>Caribbean</b>                  | 5,322.72<br>(4,719.72,6,013.78)           | 10.77<br>(9.55,12.17)  | 0.68<br>(0.67,0.7)  | 219.84<br>(160.59,304.95)          | 0.42<br>(0.31,0.58) | -0.49<br>(-0.67,-0.32) | 18,374.25<br>(13,531.12,23,558.83)          | 36.11<br>(26.56,46.29)                 | 0.46<br>(0.39,0.52)    |
| <b>Central Asia</b>               | 16,171.95<br>(14,695.17,17,910.49)        | 17.33<br>(15.91,18.97) | 0.85<br>(0.79,0.91) | 258.89<br>(180.85,325.50)          | 0.39<br>(0.26,0.48) | 0.67<br>(-0.02,1.36)   | 44,277.55<br>(32,408.38,56,973.54)          | 51.16<br>(37.60,65.30)                 | 0.79<br>(0.61,0.97)    |
| <b>Central Europe</b>             | 16,227.94<br>(14,513.11,18,043.97)        | 11.44<br>(10.20,12.72) | 0.19<br>(0.14,0.25) | 635.92<br>(451.30,899.55)          | 0.29<br>(0.21,0.41) | -1.43<br>(-1.57,-1.29) | 60,375.99<br>(44,838.93,77,458.21)          | 34.08<br>(25.02,44.13)                 | -0.23<br>(-0.29,-0.17) |
| <b>Central Latin America</b>      | 53,797.19<br>(49,153.46,58,879.03)        | 21.12<br>(19.29,23.07) | 0.12<br>(0.1,0.14)  | 2,316.96<br>(1,606.82,3,264.52)    | 1.01<br>(0.70,1.43) | -1.1<br>(-1.39,-0.81)  | 169,127.81<br>(128,800.20,213,662.79)       | 68.69<br>(52.71,86.70)                 | -0.18<br>(-0.26,-0.09) |
| <b>Central Sub-Saharan Africa</b> | 9,346.93<br>(8,255.18,10,701.82)          | 10.57<br>(9.39,11.92)  | 0.48<br>(0.38,0.59) | 290.08<br>(149.36,410.23)          | 0.65<br>(0.33,0.91) | -0.75<br>(-0.87,-0.62) | 24,605.82<br>(18,091.55,31,842.14)          | 36.53<br>(26.88,47.19)                 | -0.05<br>(-0.16,0.05)  |

|                                     |                                       |                        |                        |                                   |                     |                        |                                         |                        |                        |
|-------------------------------------|---------------------------------------|------------------------|------------------------|-----------------------------------|---------------------|------------------------|-----------------------------------------|------------------------|------------------------|
| <b>East Asia</b>                    | 229,076.27<br>(204,355.58,254,751.08) | 11.68<br>(10.56,12.89) | 0.07<br>(0.05,0.1)     | 11,181.02<br>(8,410.69,13,160.47) | 0.62<br>(0.46,0.73) | 0.14<br>(-0.31,0.59)   | 798,558.78<br>(608,293.25,1,007,875.37) | 39.30<br>(30.11,49.71) | 0.02<br>(-0.13,0.18)   |
| <b>Eastern Europe</b>               | 17,769.46<br>(15,895.58,19,888.10)    | 7.61<br>(6.83,8.47)    | 0.2<br>(0.19,0.21)     | 983.28<br>(590.14,1,255.71)       | 0.29<br>(0.18,0.37) | -0.29<br>(-0.97,0.39)  | 85,413.30<br>(65,071.18,108,177.79)     | 29.00<br>(22.08,36.95) | 0.03<br>(-0.23,0.28)   |
| <b>Eastern Sub-Saharan Africa</b>   | 41,084.97<br>(36,922.21,45,823.80)    | 17.02<br>(15.40,18.77) | 0.43<br>(0.38,0.47)    | 691.34<br>(332.65,980.65)         | 0.54<br>(0.24,0.77) | -0.58<br>(-0.65,-0.52) | 84,024.06<br>(62,307.58,110,618.58)     | 43.79<br>(32.22,57.93) | 0.11<br>(0.03,0.2)     |
| <b>High-income Asia Pacific</b>     | 37,154.58<br>(33,401.66,41,233.27)    | 14.19<br>(12.75,15.65) | -0.08<br>(-0.18,0.02)  | 1,800.39<br>(1,071.09,2,142.67)   | 0.35<br>(0.22,0.41) | -2.93<br>(-3.04,-2.83) | 129,841.47<br>(96,933.84,166,909.33)    | 38.31<br>(28.14,49.80) | -0.66<br>(-0.77,-0.55) |
| <b>High-income North America</b>    | 104,526.80<br>(96,438.64,113,262.61)  | 21.46<br>(20.02,23.09) | 0.58<br>(0.55,0.62)    | 3,385.77<br>(2,495.83,5,027.93)   | 0.51<br>(0.38,0.77) | -0.09<br>(-0.28,0.1)   | 288,983.04<br>(217,344.68,367,042.41)   | 53.53<br>(39.82,68.25) | 0.4<br>(0.36,0.44)     |
| <b>North Africa and Middle East</b> | 36,548.39<br>(32,078.13,41,602.94)    | 5.86<br>(5.18,6.63)    | 0.78<br>(0.75,0.81)    | 557.54<br>(392.52,710.89)         | 0.14<br>(0.10,0.18) | -0.26<br>(-0.42,-0.1)  | 103,572.32<br>(74,241.60,136,654.80)    | 19.04<br>(13.91,24.87) | 0.6<br>(0.58,0.62)     |
| <b>Oceania</b>                      | 498.50<br>(427.71,583.31)             | 3.92<br>(3.40,4.51)    | 0.21<br>(0.19,0.24)    | 7.79<br>(4.63,11.36)              | 0.12<br>(0.07,0.18) | 1.03<br>(0.94,1.13)    | 1,413.62<br>(1,005.10,1,906.47)         | 13.77<br>(9.89,18.40)  | 0.37<br>(0.34,0.41)    |
| <b>South Asia</b>                   | 290,965.50<br>(262,697.56,320,812.16) | 18.09<br>(16.35,19.94) | 0.28<br>(0.28,0.29)    | 14,487.73<br>(9,700.26,18,493.61) | 1.28<br>(0.86,1.64) | 0.08<br>(-0.46,0.64)   | 770,841.33<br>(597,981.92,966,528.98)   | 53.36<br>(41.81,65.99) | 0.22<br>(0.03,0.42)    |
| <b>Southeast Asia</b>               | 40,268.74<br>(35,540.55,45,593.86)    | 5.54<br>(4.92,6.24)    | 0.32<br>(0.3,0.35)     | 1,120.23<br>(711.90,1,445.95)     | 0.21<br>(0.13,0.27) | 0.91<br>(0.83,0.99)    | 125,279.28<br>(92,572.71,161,884.47)    | 18.48<br>(13.76,23.64) | 0.46<br>(0.42,0.5)     |
| <b>Southern Latin America</b>       | 10,666.62<br>(9,723.92,11,790.86)     | 14.51<br>(13.16,16.09) | 0.98<br>(0.94,1.02)    | 439.78<br>(295.28,657.32)         | 0.52<br>(0.35,0.78) | -1.21<br>(-1.53,-0.89) | 35,783.68<br>(26,772.28,45,755.86)      | 45.77<br>(34.05,58.57) | 0.69<br>(0.64,0.73)    |
| <b>Southern Sub-Saharan Africa</b>  | 13,131.76<br>(11,765.55,14,690.76)    | 17.16<br>(15.35,19.11) | -0.07<br>(-0.11,-0.03) | 362.47<br>(303.21,497.46)         | 0.72<br>(0.60,0.99) | -1.01<br>(-1.6,-0.41)  | 37,444.82<br>(28,391.44,47,750.65)      | 56.76<br>(43.29,71.95) | -0.56<br>(-0.76,-0.36) |
| <b>Tropical Latin America</b>       | 28,859.54<br>(25,679.92,32,359.69)    | 12.00<br>(10.74,13.41) | 0.23<br>(0.2,0.25)     | 659.45<br>(448.02,929.65)         | 0.28<br>(0.19,0.39) | -0.26<br>(-0.35,-0.17) | 106,837.45<br>(78,061.45,137,943.15)    | 42.82<br>(31.44,55.05) | 0.24<br>(0.21,0.27)    |
| <b>Western Europe</b>               | 92,644.46<br>(84,750.59,101,324.82)   | 15.76<br>(14.35,17.32) | 0.18<br>(0.16,0.21)    | 4,025.90<br>(2,738.25,5,548.55)   | 0.39<br>(0.27,0.54) | -2.1<br>(-2.25,-1.95)  | 296,733.89<br>(219,394.32,379,185.51)   | 42.22<br>(30.83,54.67) | -0.34<br>(-0.41,-0.27) |
| <b>Western Sub-Saharan Africa</b>   | 13,141.57<br>(11,576.75,14,995.65)    | 4.63<br>(4.09,5.23)    | 0.62<br>(0.53,0.71)    | 349.24<br>(215.24,499.41)         | 0.23<br>(0.14,0.32) | 1.02<br>(0.94,1.1)     | 30,774.26<br>(22,062.85,40,005.83)      | 13.29<br>(9.80,17.09)  | 0.83<br>(0.75,0.91)    |

**Table S2.** The numbers (2019), ASRs per 100,000 (2019), and AAPCs (1990-2019) in incidence and DALY for OA in 21 GBD regions

| Characteristic                      | Incident cases                              |                       |                 | DALYs                                     |                                     |                 |
|-------------------------------------|---------------------------------------------|-----------------------|-----------------|-------------------------------------------|-------------------------------------|-----------------|
|                                     | Numbers (95% UI)                            | ASIR (95% UI)         | AAPC (95% CI)   | Numbers (95% UI)                          | Age-standardized DALY rate (95% UI) | AAPC (95% CI)   |
| <b>Global</b>                       | 41,467,541.70(36,875,471.25,46,438,408.55)  | 492.21(438.66,551.50) | 0.13(0.11,0.15) | 18,948,965.31(9,571,297.86,37,659,659.68) | 227.97(115.31,452.70)               | 0.11(0.1,0.12)  |
| <b>Sex</b>                          |                                             |                       |                 |                                           |                                     |                 |
| <b>Male</b>                         | 17,096,933.81(15,177,169.58, 19,174,755.51) | 415.20(370.29,464.53) | 0.14(0.09,0.18) | 7388606.63 (3721537, 14684380)            | 186.96(94.45,369.80)                | 0.13(0.12,0.15) |
| <b>Female</b>                       | 24,370,607.89(21,703,146.60,27,356,317.01)  | 567.24(504.88,636.29) | 0.12(0.10,0.14) | 11,560,358.67(5,848,779.22,22,849,161.20) | 264.89(134.04,523.45)               | 0.11(0.06,0.16) |
| <b>Social-demographic index</b>     |                                             |                       |                 |                                           |                                     |                 |
| <b>Low</b>                          | 2,601,502.64(2,316,532.27,2,946,628.67)     | 405.36(361.98,456.01) | 0.05(0.02,0.09) | 1,000,765.09(507,130.19,1,989,882.26)     | 183.97(93.15,364.95)                | 0.18(0.18,0.19) |
| <b>Low middle</b>                   | 6,713,002.78(5,965,333.39,7,537,439.85)     | 437.48(390.00,489.75) | 0.25(0.23,0.27) | 2,673,112.80(1,342,772.70,5,328,495.47)   | 189.36(95.45,379.11)                | 0.31(0.29,0.32) |
| <b>Middle</b>                       | 12,068,406.20(10,675,803.38,13,557,724.70)  | 439.11(389.73,491.67) | 0.13(0,0.26)    | 5,265,520.82(2,635,856.57,10,585,574.67)  | 201.78(101.48,404.31)               | 0.27(0.24,0.3)  |
| <b>Middle high</b>                  | 9,852,744.79(8,737,169.42,11,054,724.27)    | 495.99(440.73,557.45) | 0.12(0.07,0.17) | 4,676,897.92(2,358,743.38,9,255,864.38)   | 228.46(115.31,452.39)               | 0.07(0.02,0.11) |
| <b>High</b>                         | 9,477,802.41(8,494,709.17,10,659,393.77)    | 635.87(568.36,714.76) | 0.20(0.17,0.22) | 5,324,252.26(2,710,546.47,10,514,597.34)  | 306.74(155.34,616.21)               | 0.23(0.2,0.25)  |
| <b>Region</b>                       |                                             |                       |                 |                                           |                                     |                 |
| <b>Andean Latin America</b>         | 294,128.30(263,316.81,327,298.67)           | 494.51(442.66,550.94) | 0.34(0.33,0.36) | 123,920.38(62,426.94,248,045.64)          | 218.10(109.96,433.99)               | 0.38(0.37,0.4)  |
| <b>Australasia</b>                  | 259,273.54(230,966.61,293,960.18)           | 649.52(577.71,733.86) | 0.32(0.3,0.34)  | 143,255.07(72,655.25,287,774.76)          | 312.53(158.11,631.41)               | 0.32(0.28,0.36) |
| <b>Caribbean</b>                    | 243,354.48(216,555.04,273,451.44)           | 469.58(418.12,526.95) | 0.23(0.22,0.23) | 106,091.21(53,399.51,213,522.26)          | 203.91(102.56,410.23)               | 0.25(0.24,0.27) |
| <b>Central Asia</b>                 | 369,413.56(325,438.63,421,161.94)           | 416.36(371.12,473.06) | 0.14(0.11,0.16) | 150,888.09(76,713.13,301,366.25)          | 194.76(98.99,390.02)                | 0.11(0.07,0.15) |
| <b>Central Europe</b>               | 739,828.37(662,314.49,831,442.22)           | 412.30(368.31,462.62) | 0.2(0.19,0.2)   | 363,687.48(184,150.33,718,477.39)         | 179.50(90.05,353.73)                | 0.22(0.22,0.23) |
| <b>Central Latin America</b>        | 1,319,394.95(1,169,766.64,1,488,513.96)     | 524.55(465.92,590.76) | 0.28(0.26,0.29) | 560,669.40(285,426.55,1,102,704.29)       | 232.87(118.67,459.61)               | 0.32(0.31,0.34) |
| <b>Central Sub-Saharan Africa</b>   | 306,476.15(270,363.02,347,082.95)           | 431.65(383.77,485.57) | 0.1(0.09,0.1)   | 111,149.63(56,580.92,219,364.63)          | 194.56(99.83,380.99)                | 0.13(0.12,0.14) |
| <b>East Asia</b>                    | 11,025,646.09(9,684,347.66,12,460,943.68)   | 509.13(450.01,573.24) | 0.25(0.19,0.31) | 4,883,685.05(2,428,307.37,9,856,868.59)   | 224.59(112.43,451.95)               | 0.28(0.22,0.34) |
| <b>Eastern Europe</b>               | 1,802,418.55(1,592,906.73,2,052,448.15)     | 590.23(523.27,674.83) | 0.1(0.07,0.12)  | 990,569.10(505,745.69,1,997,969.07)       | 293.51(150.41,591.43)               | 0.06(0.01,0.11) |
| <b>Eastern Sub-Saharan Africa</b>   | 927,386.14(821,269.12,1,049,656.89)         | 436.66(388.39,492.36) | 0.16(0.15,0.16) | 339,050.08(172,632.98,667,382.38)         | 196.30(100.13,386.30)               | 0.18(0.18,0.19) |
| <b>High-income Asia Pacific</b>     | 2,088,906.84(1,879,622.27,2,343,285.60)     | 675.44(601.80,759.94) | 0.18(0.12,0.25) | 1,256,647.23(638,659.10,2,501,153.03)     | 322.66(163.41,640.98)               | 0.27(0.23,0.32) |
| <b>High-income North America</b>    | 3,751,718.86(3,316,055.20,4,257,734.19)     | 736.56(654.21,833.05) | 0.2(0.17,0.24)  | 2,163,818.47(1,117,825.69,4,324,793.75)   | 367.37(188.71,739.39)               | 0.14(0.1,0.18)  |
| <b>North Africa and Middle East</b> | 2,292,214.45(2,035,506.31,2,570,668.49)     | 430.41(382.17,481.93) | 0.31(0.3,0.32)  | 852,891.21(425,289.55,1,687,137.59)       | 185.44(92.77,370.20)                | 0.33(0.32,0.34) |
| <b>Oceania</b>                      | 37,422.86(32,787.51,42,192.51)              | 396.25(351.63,443.16) | 0.2(0.17,0.22)  | 12,938.52(6,383.05,26,215.82)             | 166.52(82.78,336.59)                | 0.22(0.2,0.23)  |
| <b>South Asia</b>                   | 6,661,563.91(5,942,417.71,7,491,336.29)     | 421.91(375.77,472.43) | 0.28(0.26,0.3)  | 2,569,765.28(1,297,451.28,5,130,108.02)   | 177.20(89.77,355.02)                | 0.34(0.33,0.35) |
| <b>Southeast Asia</b>               | 2,375,632.26(2,087,010.22,2,662,466.85)     | 336.25(298.29,374.23) | 0.32(0.31,0.33) | 906,248.48(445,551.78,1,822,118.96)       | 139.84(68.94,281.08)                | 0.38(0.37,0.39) |
| <b>Southern Latin America</b>       | 480,228.73(428,682.69,543,046.16)           | 617.77(552.09,699.39) | 0.27(0.25,0.29) | 244,275.86(124,500.21,487,435.14)         | 299.47(152.46,598.84)               | 0.28(0.28,0.29) |
| <b>Southern Sub-Saharan Africa</b>  | 334,466.96(297,145.36,377,015.01)           | 507.30(453.44,571.02) | 0.18(0.17,0.19) | 135,193.22(68,746.52,267,079.31)          | 230.53(117.47,453.98)               | 0.16(0.15,0.16) |
| <b>Tropical Latin America</b>       | 1,230,539.74(1,087,888.55,1,380,275.13)     | 483.19(428.62,541.73) | 0.28(0.27,0.29) | 508,821.81(255,356.34,1,007,642.16)       | 206.00(103.51,407.54)               | 0.33(0.32,0.35) |
| <b>Western Europe</b>               | 3,785,517.27(3,372,143.22,4,249,460.88)     | 556.00(497.13,622.23) | 0.19(0.17,0.21) | 2,103,868.59(1,067,687.76,4,239,455.34)   | 258.45(130.74,514.19)               | 0.21(0.2,0.22)  |
| <b>Western Sub-Saharan Africa</b>   | 1,142,009.69(1,008,100.01,1,293,474.66)     | 464.55(413.06,522.98) | 0.18(0.17,0.18) | 421,531.14(215,344.06,835,155.98)         | 208.83(106.42,411.09)               | 0.18(0.18,0.19) |

**Table S3.** The numbers (2019), ASRs per 100,000 (2019), and AAPCs (1990-2019) in incidence and DALY for LBP in 21 GBD regions

| Characteristic                    | Incident cases                                    |                                 |                        | DALYs                                          |                                        |                        |
|-----------------------------------|---------------------------------------------------|---------------------------------|------------------------|------------------------------------------------|----------------------------------------|------------------------|
|                                   | Numbers<br>(95% UI)                               | ASIR<br>(95% UI)                | AAPC<br>(95% CI)       | Numbers<br>(95% UI)                            | Age-standardized DALY rate<br>(95% UI) | AAPC<br>(95% CI)       |
| <b>Global</b>                     | 223,455,640.80<br>(197,710,057.80,252,992,458.10) | 2,748.90<br>(2,425.77,3,106.89) | -0.49<br>(-0.52,-0.46) | 63,685,119.80<br>(44,999,198.06,85,192,922.21) | 780.15<br>(549.34,1,046.05)            | -0.61<br>(-0.65,-0.57) |
| <b>Sex</b>                        |                                                   |                                 |                        |                                                |                                        |                        |
| <b>Male</b>                       | 95,250,576.28<br>(83,907,887.24,108,430,887.43)   | 2,386.36<br>(2,105.61,2,707.67) | -0.51<br>(-0.53,-0.49) | 26,836,194.42<br>(18,895,424.18,35,919,224.79) | 670.91<br>(471.18,897.50)              | -0.60<br>(-0.62,-0.58) |
| <b>Female</b>                     | 128,205,064.53<br>(113,796,162.79,144,673,206.67) | 3,094.13<br>(2,740.82,3,491.19) | -0.47<br>(-0.50,-0.44) | 36,848,925.37<br>(49452893.97,26073771.78)     | 883.96<br>(625.06,1,186.88)            | -0.63<br>(-0.67,-0.58) |
| <b>Social-demographic index</b>   |                                                   |                                 |                        |                                                |                                        |                        |
| <b>Low</b>                        | 20,443,588.19<br>(17,844,874.82,23,432,789.64)    | 2,585.27<br>(2,284.51,2,929.10) | -0.35<br>(-0.51,-0.19) | 5,476,316.20<br>(3,848,252.56,7,290,440.37)    | 707.05<br>(499.26,942.61)              | -0.24<br>(-0.28,-0.2)  |
| <b>Low middle</b>                 | 41,693,598.48<br>(36,537,110.83,47,459,209.93)    | 2,588.89<br>(2,283.28,2,934.81) | -0.54<br>(-0.6,-0.48)  | 10,876,183.31<br>(7,675,136.95,14,492,257.53)  | 676.70<br>(479.12,903.22)              | -0.56<br>(-0.59,-0.53) |
| <b>Middle</b>                     | 68,708,801.23<br>(60,597,771.10,78,382,297.97)    | 2,679.47<br>(2,374.12,3,031.34) | -0.62<br>(-0.76,-0.49) | 18,452,124.68<br>(12,995,697.31,24,705,516.00) | 714.13<br>(504.61,953.55)              | -0.58<br>(-0.61,-0.54) |
| <b>Middle high</b>                | 49,520,031.10<br>(43,779,336.44,56,304,648.03)    | 2,824.31<br>(2,499.25,3,195.99) | -0.57<br>(-0.6,-0.54)  | 13,773,460.16<br>(9,743,929.83,18,598,942.66)  | 773.88<br>(546.26,1,038.23)            | -0.62<br>(-0.64,-0.6)  |
| <b>High</b>                       | 39,367,190.11<br>(35,004,011.28,44,195,841.75)    | 3,126.59<br>(2,774.58,3,503.11) | -0.18<br>(-0.22,-0.14) | 15,069,735.04<br>(10,794,608.44,20,202,296.35) | 1,142.67<br>(809.85,1,522.54)          | -0.38<br>(-0.4,-0.35)  |
| <b>Region</b>                     |                                                   |                                 |                        |                                                |                                        |                        |
| <b>Andean Latin America</b>       | 1,593,430.93<br>(1,407,493.07,1,795,250.12)       | 2,583.88<br>(2,289.41,2,901.00) | -0.02<br>(-0.03,-0.01) | 415,525.27<br>(293,398.05,559,273.71)          | 674.39<br>(476.34,909.81)              | -0.01<br>(-0.02,-0.01) |
| <b>Australasia</b>                | 957,334.77<br>(837,148.58,1,087,057.57)           | 2,765.45<br>(2,415.95,3,140.47) | -0.17<br>(-0.19,-0.16) | 353,808.08<br>(248,870.36,476,776.71)          | 988.29<br>(687.18,1,338.31)            | -0.38<br>(-0.41,-0.35) |
| <b>Caribbean</b>                  | 1,377,519.62<br>(1,221,658.58,1,551,816.50)       | 2,759.93<br>(2,448.95,3,108.12) | -0.05<br>(-0.06,-0.04) | 364,602.29<br>(257,466.13,485,551.49)          | 727.52<br>(513.24,964.96)              | -0.07<br>(-0.08,-0.05) |
| <b>Central Asia</b>               | 2,783,877.01<br>(2,448,611.69,3,189,566.38)       | 3,140.79<br>(2,787.30,3,554.79) | -0.04<br>(-0.05,-0.04) | 731,962.00<br>(513,799.10,980,790.78)          | 827.78<br>(582.95,1,105.67)            | -0.05<br>(-0.05,-0.04) |
| <b>Central Europe</b>             | 6,121,044.03<br>(5,439,841.26,6,937,723.99)       | 4,106.34<br>(3,639.70,4,642.89) | -0.08<br>(-0.09,-0.08) | 1,709,097.20<br>(1,209,435.16,2,309,586.32)    | 1,127.05<br>(788.54,1,509.64)          | -0.08<br>(-0.09,-0.08) |
| <b>Central Latin America</b>      | 7,296,778.91<br>(6,427,249.38,8,326,703.27)       | 2,875.79<br>(2,532.93,3,268.83) | -0.01<br>(-0.03,0.01)  | 1,953,805.09<br>(1,372,397.70,2,601,136.01)    | 768.59<br>(541.10,1,024.71)            | 0<br>(-0.01,0.01)      |
| <b>Central Sub-Saharan Africa</b> | 2,538,292.16<br>(2,218,783.93,2,910,412.11)       | 2,855.36<br>(2,529.77,3,237.10) | -0.03<br>(-0.04,-0.03) | 644,392.43<br>(451,536.80,864,330.16)          | 745.68<br>(524.61,1,000.11)            | -0.01<br>(-0.02,0)     |
| <b>East Asia</b>                  | 42,253,410.07<br>(37,200,343.97,48,204,474.44)    | 2,317.36<br>(2,050.70,2,613.84) | -1.11<br>(-1.18,-1.05) | 10,885,998.92<br>(7,718,845.36,14,745,714.40)  | 589.12<br>(418.46,790.66)              | -1.15<br>(-1.22,-1.09) |
| <b>Eastern Europe</b>             | 10,389,031.16<br>(9,229,521.50,11,763,807.13)     | 3,820.55<br>(3,396.85,4,291.73) | -0.07<br>(-0.08,-0.06) | 2,847,346.83<br>(2,024,234.76,3,815,424.96)    | 1,032.12<br>(728.06,1,374.13)          | -0.06<br>(-0.07,-0.05) |

|                                     |                                                |                                 |                        |                                              |                               |                        |
|-------------------------------------|------------------------------------------------|---------------------------------|------------------------|----------------------------------------------|-------------------------------|------------------------|
| <b>Eastern Sub-Saharan Africa</b>   | 7,346,879.55<br>(6,406,398.61,8,430,098.48)    | 2,728.16<br>(2,416.55,3,102.99) | -0.04<br>(-0.05,-0.03) | 1,869,808.89<br>(1,303,043.64,2,481,458.89)  | 714.16<br>(501.81,957.39)     | -0.01<br>(-0.02,-0.01) |
| <b>High-income Asia Pacific</b>     | 7,545,398.58<br>(6,642,604.86,8,583,366.13)    | 3,003.66<br>(2,627.78,3,400.94) | -0.23<br>(-0.27,-0.19) | 2,884,797.49<br>(2,038,411.41,3,897,904.77)  | 1,080.52<br>(751.05,1,464.88) | -0.43<br>(-0.47,-0.4)  |
| <b>High-income North America</b>    | 14,965,167.11<br>(13,405,564.18,16,680,784.24) | 3,434.08<br>(3,075.07,3,844.25) | -0.21<br>(-0.24,-0.18) | 6,174,175.01<br>(4,449,895.54,8,124,406.08)  | 1,362.08<br>(975.68,1,800.16) | -0.42<br>(-0.45,-0.38) |
| <b>North Africa and Middle East</b> | 18,336,869.67<br>(16,080,396.79,20,926,522.90) | 3,215.92<br>(2,838.75,3,638.32) | -0.15<br>(-0.17,-0.14) | 4,899,300.20<br>(3,404,484.74,6,533,346.73)  | 862.00<br>(605.50,1,153.26)   | -0.21<br>(-0.22,-0.2)  |
| <b>Oceania</b>                      | 402,970.33<br>(353,605.18,459,664.46)          | 3,845.30<br>(3,419.28,4,347.77) | -0.00<br>(-0.01,0.00)  | 102,524.48<br>(72,075.27,136,527.18)         | 983.60<br>(695.20,1,303.95)   | -0.01<br>(-0.01,0)     |
| <b>South Asia</b>                   | 38,927,433.40<br>(34,094,058.98,44,442,393.16) | 2,362.13<br>(2,078.43,2,684.03) | -0.76<br>(-0.83,-0.68) | 9,920,979.52<br>(7,027,196.41,13,254,436.64) | 603.50<br>(427.05,809.79)     | -0.85<br>(-0.91,-0.8)  |
| <b>Southeast Asia</b>               | 23,716,206.03<br>(20,966,779.88,26,943,293.61) | 3,478.79<br>(3,093.26,3,920.62) | -0.09<br>(-0.1,-0.08)  | 6,174,959.36<br>(4,329,885.70,8,252,199.45)  | 899.97<br>(634.65,1,203.07)   | -0.05<br>(-0.07,-0.04) |
| <b>Southern Latin America</b>       | 1,759,703.81<br>(1,539,299.16,2,005,001.49)    | 2,391.11<br>(2,085.25,2,715.66) | 0.00<br>(-0.01,0.01)   | 590,175.79<br>(411,523.38,800,737.91)        | 790.26<br>(550.09,1,072.98)   | -0.04<br>(-0.05,-0.04) |
| <b>Southern Sub-Saharan Africa</b>  | 1,734,724.79<br>(1,522,546.08,1,981,795.28)    | 2,492.17<br>(2,207.79,2,828.35) | -0.17<br>(-0.19,-0.16) | 442,883.44<br>(312,871.89,592,296.21)        | 638.79<br>(452.27,853.40)     | -0.19<br>(-0.2,-0.19)  |
| <b>Tropical Latin America</b>       | 7,835,429.94<br>(6,889,648.73,8,878,913.01)    | 3,237.41<br>(2,853.41,3,660.01) | 0.01<br>(0,0.02)       | 2,098,383.48<br>(1,480,053.81,2,786,301.06)  | 860.28<br>(606.31,1,146.08)   | 0.04<br>(0.03,0.05)    |
| <b>Western Europe</b>               | 16,164,047.29<br>(14,225,919.21,18,317,753.65) | 2,934.84<br>(2,576.47,3,315.88) | -0.11<br>(-0.13,-0.09) | 6,174,812.68<br>(4,342,038.80,8,320,107.53)  | 1,062.57<br>(745.59,1,441.69) | -0.22<br>(-0.24,-0.21) |
| <b>Western Sub-Saharan Africa</b>   | 9,410,091.67<br>(8,227,950.80,10,765,369.93)   | 2,982.60<br>(2,640.24,3,364.71) | 0.00<br>(-0.01,0.01)   | 2,445,781.34<br>(1,718,562.04,3,281,522.65)  | 795.74<br>(560.39,1,065.44)   | 0.01<br>(0.01,0.02)    |

**Table S4.** The numbers (2019), ASRs per 100,000 (2019), and AAPCs (1990-2019) in incidence and DALY for NP in 21 GBD regions

| Characteristic                    | Incident cases                                 |                             |                        | DALYs                                          |                                        |                        |
|-----------------------------------|------------------------------------------------|-----------------------------|------------------------|------------------------------------------------|----------------------------------------|------------------------|
|                                   | Numbers<br>(95% UI)                            | ASIR<br>(95% UI)            | AAPC<br>(95% UI)       | Numbers<br>(95% UI)                            | Age-standardized DALY rate<br>(95% UI) | AAPC<br>(95% UI)       |
| <b>Global</b>                     | 47,528,964.54<br>(37,448,843.73,59,936,489.71) | 579.09<br>(457.90,729.64)   | -0.02<br>(-0.02,-0.01) | 22,081,323.13<br>(14,508,244.16,31,726,932.92) | 265.30<br>(174.33,380.31)              | -0.01<br>(-0.03,0.01)  |
| <b>Sex</b>                        |                                                |                             |                        |                                                |                                        |                        |
| <b>Male</b>                       | 15,237,682.37<br>(12,011,670.57,19,367,268.20) | 523.59<br>(415.87, 657.86)  | -0.03<br>(-0.04,-0.01) | 9,536,750.69<br>(6,265,845.75,13,720,546.34)   | 235.00<br>(154.31,336.38)              | -0.02<br>(-0.03,-0.00) |
| <b>Female</b>                     | 26,327,987.52<br>(20,913,249.89,33,183,183.03) | 634.64<br>(502.34,801.40)   | -0.01<br>(-0.02,-0.00) | 12,544,572.44<br>(8,297,692.59,18,040,631.86)  | 298.92<br>(197.32, 428.52)             | -0.01<br>(-0.03,0.01)  |
| <b>Social-demographic index</b>   |                                                |                             |                        |                                                |                                        |                        |
| <b>Low</b>                        | 2,673,921.91<br>(2,072,396.37,3,460,787.25)    | 331.03<br>(259.62,418.89)   | -0.07<br>(-0.14,-0.01) | 1,123,995.83<br>(730,695.29,1,633,087.65)      | 146.47<br>(96.13,210.95)               | 0.05<br>(0.04,0.05)    |
| <b>Low middle</b>                 | 7,363,102.37<br>(5,778,268.38,9,399,710.09)    | 446.24<br>(350.72,563.05)   | -0.08<br>(-0.08,-0.07) | 3,159,636.28<br>(2,076,832.85,4,557,814.73)    | 195.07<br>(128.53,278.78)              | -0.03<br>(-0.04,-0.03) |
| <b>Middle</b>                     | 17,199,444.25<br>(13,449,847.44,21,991,097.47) | 647.26<br>(510.98,819.33)   | -0.13<br>(-0.22,-0.04) | 8,034,975.21<br>(5,281,974.46,11,640,397.01)   | 300.58<br>(197.29,430.77)              | -0.06<br>(-0.08,-0.04) |
| <b>Middle high</b>                | 11,067,656.72<br>(8,681,592.00,14,018,384.96)  | 621.33<br>(491.51,785.85)   | 0.19<br>(0.16,0.22)    | 5,184,830.66<br>(3,406,380.85,7,458,828.65)    | 282.68<br>(184.03,405.96)              | 0.22<br>(0.2,0.25)     |
| <b>High</b>                       | 8,306,739.10<br>(6,704,070.37,10,153,045.17)   | 676.79<br>(541.87,837.14)   | 0.26<br>(0.2,0.33)     | 4,566,356.72<br>(3,100,503.04,6,494,263.03)    | 347.71<br>(234.89,495.02)              | 0.25<br>(0.16,0.34)    |
| <b>Region</b>                     |                                                |                             |                        |                                                |                                        |                        |
| <b>Andean Latin America</b>       | 194,773.58<br>(151,509.11,248,119.56)          | 313.42<br>(244.25,397.34)   | 0.00<br>(0.00,0.00)    | 83,265.63<br>(55,078.22,119,749.24)            | 135.34<br>(89.56,194.56)               | 0.01<br>(0.01,0.01)    |
| <b>Australasia</b>                | 85,899.58<br>(68,491.04,106,698.40)            | 241.27<br>(192.37,300.91)   | -0.14<br>(-0.14,-0.14) | 38,499.95<br>(25,054.75,55,361.54)             | 104.56<br>(68.63,149.93)               | -0.15<br>(-0.16,-0.13) |
| <b>Caribbean</b>                  | 157,113.15<br>(122,889.16,198,296.40)          | 313.51<br>(244.37,397.34)   | 0.00<br>(0.00,0.00)    | 68,044.07<br>(45,122.31,98,537.75)             | 134.67<br>(89.48,193.76)               | -0.01<br>(-0.01,-0.00) |
| <b>Central Asia</b>               | 300,561.98<br>(233,910.28,385,242.37)          | 326.52<br>(256.10,412.58)   | -0.00<br>(-0.00,-0.00) | 128,309.54<br>(83,542.74,188,387.45)           | 141.13<br>(91.90,203.70)               | -0.01<br>(-0.01,-0.00) |
| <b>Central Europe</b>             | 526,037.45<br>(417,177.86,657,314.95)          | 348.59<br>(272.57,440.76)   | 0.02<br>(0.02,0.02)    | 233,685.18<br>(152,893.22,336,638.74)          | 148.76<br>(98.07,214.87)               | 0.03<br>(0.03,0.03)    |
| <b>Central Latin America</b>      | 881,972.84<br>(687,579.67,1,130,334.00)        | 345.82<br>(271.10,440.72)   | -0.00<br>(-0.00,-0.00) | 372,549.50<br>(246,830.73,539,733.62)          | 146.60<br>(97.34,211.78)               | 0.01<br>(0.00,0.01)    |
| <b>Central Sub-Saharan Africa</b> | 246,043.83<br>(187,967.55,318,436.78)          | 268.28<br>(209.08,340.47)   | -0.00<br>(-0.01,-0.00) | 98,039.68<br>(63,563.99,142,016.11)            | 113.43<br>(74.84,163.66)               | 0.02<br>(0.01,0.03)    |
| <b>East Asia</b>                  | 15,290,226.66<br>(11,998,038.67,19,669,322.36) | 804.10<br>(638.38,1,020.47) | 0.03<br>(0.03,0.04)    | 6,991,872.96<br>(4,541,439.30,10,043,872.72)   | 356.35<br>(233.22,513.21)              | 0.04<br>(0.04,0.05)    |
| <b>Eastern Europe</b>             | 1,044,113.95<br>(818,597.50,1,310,466.47)      | 387.59<br>(302.54,487.69)   | 0.00<br>(-0.00,0.0)    | 452,371.21<br>(295,617.42,652,101.50)          | 162.79<br>(107.90,236.44)              | 0.02<br>(0.01,0.02)    |



|                                     |                                             |                             |                        |                                             |                           |                        |
|-------------------------------------|---------------------------------------------|-----------------------------|------------------------|---------------------------------------------|---------------------------|------------------------|
| <b>Eastern Sub-Saharan Africa</b>   | 822,238.03<br>(630,159.08,1,064,031.63)     | 289.19<br>(226.79,367.14)   | 0.01<br>(0.01,0.01)    | 325,921.65<br>(210,976.61,472,910.32)       | 121.86<br>(79.72,174.64)  | 0.03<br>(0.02,0.03)    |
| <b>High-income Asia Pacific</b>     | 1,085,782.41<br>(858,963.95,1,353,799.88)   | 413.79<br>(326.47,525.14)   | -0.09<br>(-0.09,-0.08) | 524,073.31<br>(343,739.73,762,845.02)       | 187.76<br>(124.65,272.40) | -0.05<br>(-0.06,-0.03) |
| <b>High-income North America</b>    | 3,898,342.46<br>(3,147,792.29,4,722,527.88) | 915.20<br>(736.57,1,122.21) | 0.42<br>(0.17,0.68)    | 2,188,580.59<br>(1,489,072.06,3,091,220.52) | 479.11<br>(322.96,677.58) | 0.54<br>(0.28,0.81)    |
| <b>North Africa and Middle East</b> | 3,842,558.19<br>(2,969,837.34,5,062,070.03) | 649.20<br>(509.23,829.21)   | -0.01<br>(-0.02,0.00)  | 1,729,128.39<br>(1,136,538.24,2,521,211.89) | 302.98<br>(201.54,438.79) | -0.01<br>(-0.02,0.01)  |
| <b>Oceania</b>                      | 74,588.48<br>(58,068.25,96,779.09)          | 675.69<br>(534.88,854.74)   | 0.00<br>(0.00,0.00)    | 33,057.74<br>(21,424.45,47,333.53)          | 315.99<br>(206.04,451.38) | -0.01<br>(-0.01,-0.00) |
| <b>South Asia</b>                   | 6,597,845.82<br>(5,150,566.80,8,422,425.54) | 384.98<br>(300.36,484.57)   | 0.01<br>(0.00,0.01)    | 2,695,092.36<br>(1,783,438.42,3,919,417.41) | 159.65<br>(106.13,231.23) | 0.03<br>(0.02,0.03)    |
| <b>Southeast Asia</b>               | 6,412,627.16<br>(4,999,352.13,8,221,511.06) | 897.30<br>(709.29,1,133.99) | 0.02<br>(0.02,0.02)    | 2,951,469.27<br>(1,944,453.78,4,240,975.22) | 416.13<br>(273.74,596.53) | 0.03<br>(0.03,0.03)    |
| <b>Southern Latin America</b>       | 294,219.85<br>(230,877.84,369,571.33)       | 396.75<br>(310.30,501.31)   | -0.00<br>(-0.00,-0.00) | 144,984.61<br>(95,211.10,207,223.22)        | 192.09<br>(126.84,274.22) | -0.00<br>(-0.01,0.00)  |
| <b>Southern Sub-Saharan Africa</b>  | 226,778.70<br>(175,057.02,292,595.77)       | 310.04<br>(244.92,392.42)   | 0.01<br>(0.01,0.01)    | 92,207.86<br>(60,668.53,133,909.99)         | 128.81<br>(84.61,183.47)  | -0.01<br>(-0.02,-0.01) |
| <b>Tropical Latin America</b>       | 1,250,558.41<br>(977,681.16,1,603,774.70)   | 500.36<br>(392.45,637.52)   | 0.02<br>(0.02,0.03)    | 553,219.44<br>(363,652.26,807,726.87)       | 220.23<br>(144.35,320.39) | 0.04<br>(0.01,0.07)    |
| <b>Western Europe</b>               | 3,318,754.52<br>(2,625,108.38,4,106,299.86) | 639.05<br>(505.78,803.75)   | 0.02<br>(-0.07,0.11)   | 1,985,044.77<br>(1,322,068.34,2,849,095.51) | 353.29<br>(234.75,509.93) | -0.02<br>(-0.08,0.04)  |
| <b>Western Sub-Saharan Africa</b>   | 977,927.48<br>(747,069.10,1,261,457.29)     | 310.23<br>(242.34,392.01)   | 0.07<br>(0.06,0.08)    | 391,905.42<br>(252,048.34,564,171.85)       | 131.86<br>(86.83,189.14)  | 0.09<br>(0.09,0.10)    |

**Table S5.** The numbers (2019), ASRs per 100,000 (2019), and AAPCs (1990-2019) in incidence and DALY for gout in 21 GBD regions

| Characteristic                      | Incident cases                               |                          |                       | DALYs                                       |                                     |                    |
|-------------------------------------|----------------------------------------------|--------------------------|-----------------------|---------------------------------------------|-------------------------------------|--------------------|
|                                     | Numbers (95% UI)                             | ASIR (95% UI)            | AAPC (95% CI)         | Numbers (95% UI)                            | Age-standardized DALY rate (95% UI) | AAPC (95% CI)      |
| <b>Global</b>                       | 9,222,886.78<br>(7,419,132.06,11,521,165.01) | 111.33<br>(90.01,139.20) | 0.58<br>(0.51,0.66)   | 1,673,973.37<br>(1,068,061.11,2,393,469.24) | 20.23(12.91,28.88)                  | 0.71(0.61,0.8)     |
| <b>Sex</b>                          |                                              |                          |                       |                                             |                                     |                    |
| <b>Male</b>                         | 6,884,144.09(5,505,947.81,8,637,715.83)      | 172.37(139.19,215.31)    | 0.55(0.48,0.63)       | 1,271,609.15(803,986.97,1,820,725.15)       | 32.07(20.37,45.73)                  | 0.70(0.60,0.79)    |
| <b>Female</b>                       | 2,338,742.69(1,882,322.97,2,927,045.63)      | 54.22(43.64,67.71)       | 0.62(0.53,0.70)       | 402,364.23(256,354.38,577,997.41)           | 9.29(5.92,13.33)                    | 0.66(0.63,0.70)    |
| <b>Social-demographic index</b>     |                                              |                          |                       |                                             |                                     |                    |
| <b>Low</b>                          | 475,261.87(378,535.41,593,717.73)            | 77.52(62.28,97.72)       | -0.06<br>(-0.13,0.01) | 77,514.35(48,489.37,112,229.27)             | 13.11(8.27,19.07)                   | 0.17(0.16,0.18)    |
| <b>Low middle</b>                   | 1,253,774.00(1,000,302.59,1,577,607.81)      | 84.64(67.99,106.57)      | 0.24(0.22,0.25)       | 198,787.64(123,995.95,285,702.94)           | 13.59(8.61,19.60)                   | 0.31(0.29,0.34)    |
| <b>Middle</b>                       | 2,737,497.71(2,179,744.47,3,451,960.49)      | 104.78(84.25,131.76)     | 0.36(0.16,0.56)       | 488,456.35(305,700.49,706,777.22)           | 18.70(11.89,26.99)                  | 0.58(0.52,0.64)    |
| <b>Middle high</b>                  | 2,221,415.26(1,772,776.95,2,816,424.44)      | 113.64(90.80,142.13)     | 0.77(0.73,0.82)       | 388,308.52(241,619.14,558,975.48)           | 19.61(12.31,28.20)                  | 0.85(0.8,0.9)      |
| <b>High</b>                         | 2,217,279.99(1,801,671.67,2,725,359.75)      | 144.21(118.28,175.79)    | 0.99(0.96,1.02)       | 520,271.64(337,506.43,735,010.57)           | 32.05(20.59,44.73)                  | 1.32(1.25,1.39)    |
| <b>Region</b>                       |                                              |                          |                       |                                             |                                     |                    |
| <b>Andean Latin America</b>         | 33,280.50(26,525.10,41,170.82)               | 56.12(44.82,69.38)       | 0.74(0.72,0.77)       | 5,467.05(3,383.55,7,885.85)                 | 9.28(5.76,13.48)                    | 0.80(0.75,0.85)    |
| <b>Australasia</b>                  | 79,343.17(63,678.26,99,429.33)               | 186.58(150.74,233.20)    | 0.77(0.68,0.85)       | 19,660.30(12,557.85,28,111.19)              | 43.53(28.01,62.25)                  | 1.10(1.07,1.13)    |
| <b>Caribbean</b>                    | 24,645.89(19,826.71,30,452.44)               | 48.29(38.89,59.42)       | 0.54(0.53,0.55)       | 4,007.91(2,509.36,5,760.97)                 | 7.82(4.92,11.27)                    | 0.54(0.52,0.56)    |
| <b>Central Asia</b>                 | 66,579.01(52,454.70,83,484.55)               | 79.91(63.68,100.08)      | 0.38(0.36,0.39)       | 10,641.90(6,721.84,15,591.51)               | 13.00(8.22,18.87)                   | 0.41(0.38,0.45)    |
| <b>Central Europe</b>               | 118,648.79(94,773.54,151,088.48)             | 64.37(51.34,81.06)       | 0.41(0.40,0.42)       | 19,057.67(12,005.33,27,776.64)              | 10.13(6.44,14.70)                   | 0.45(0.42,0.47)    |
| <b>Central Latin America</b>        | 88,882.07(70,004.90,111,009.35)              | 35.75(28.36,44.60)       | 0.48(0.44,0.52)       | 14,593.70(9,226.40,20,928.15)               | 5.88(3.73,8.46)                     | 0.47(0.42,0.52)    |
| <b>Central Sub-Saharan Africa</b>   | 59,651.07(47,074.32,74,579.82)               | 90.08(71.49,114.49)      | 0.07(0.06,0.08)       | 8,962.30(5,634.47,12,947.39)                | 14.22(8.95,20.72)                   | 0.08(0.06,0.1)     |
| <b>East Asia</b>                    | 3,153,168.56(2,509,139.76,4,008,345.54)      | 153.20(123.14,191.49)    | 0.81(0.71,0.91)       | 530,704.85(327,808.33,765,617.86)           | 25.47(16.05,36.58)                  | 0.9(0.81,0.99)     |
| <b>Eastern Europe</b>               | 263,542.84(208,957.45,336,557.46)            | 83.83(67.11,105.72)      | 0.43(0.41,0.45)       | 42,049.01(26,393.15,61,310.60)              | 13.15(8.29,19.07)                   | 0.48(0.46,0.51)    |
| <b>Eastern Sub-Saharan Africa</b>   | 189,343.74(150,163.34,236,086.81)            | 94.51(75.77,119.79)      | 0.19(0.17,0.21)       | 28,605.26(18,087.69,41,432.93)              | 14.99(9.51,21.86)                   | 0.22(0.2,0.23)     |
| <b>High-income Asia Pacific</b>     | 402,477.99(321,234.89,508,454.41)            | 119.13(94.62,149.57)     | 0.24(0.2,0.27)        | 81,033.29(50,841.55,117,445.00)             | 22.58(14.20,32.52)                  | 0.36(0.34,0.38)    |
| <b>High-income North America</b>    | 1,111,379.37(916,929.70,1,344,332.15)        | 214.23(178.39,256.60)    | 1.55(1.38,1.71)       | 285,583.90(187,216.88,395,014.92)           | 52.26(34.42,72.27)                  | 2.03(1.94,2.13)    |
| <b>North Africa and Middle East</b> | 490,264.32(389,867.83,606,813.40)            | 97.70(78.46,123.21)      | 0.36(0.34,0.39)       | 77,514.36(48,807.97,111,729.90)             | 15.83(9.96,22.75)                   | 0.38(0.36,0.4)     |
| <b>Oceania</b>                      | 12,143.89(9,535.68,15,158.31)                | 139.36(111.95,173.68)    | 0.25(0.23,0.27)       | 1,884.73(1,170.05,2,709.28)                 | 22.51(14.19,32.43)                  | 0.25(0.22,0.29)    |
| <b>South Asia</b>                   | 1,183,315.70(944,271.93,1,491,888.72)        | 77.94(62.52,98.21)       | 0.2(0.17,0.23)        | 180,045.54(113,780.99,261,292.49)           | 12.03(7.62,17.37)                   | 0.23(0.2,0.25)     |
| <b>Southeast Asia</b>               | 831,398.07(659,788.74,1,041,227.64)          | 124.02(99.65,155.79)     | 0.51(0.5,0.52)        | 133,986.29(84,560.29,193,323.97)            | 20.16(12.70,29.13)                  | 0.56(0.54,0.58)    |
| <b>Southern Latin America</b>       | 105,042.64(83,794.55,131,906.97)             | 133.45(106.66,166.46)    | 0.52(0.49,0.54)       | 22,861.28(14,243.83,32,993.96)              | 28.53(17.85,41.18)                  | 0.70(0.67,0.73)    |
| <b>Southern Sub-Saharan Africa</b>  | 70,339.22(56,010.49,88,718.66)               | 111.31(88.84,141.07)     | 0.2(0.17,0.23)        | 10,848.72(6,754.92,15,565.84)               | 17.60(11.07,25.46)                  | 0.18(0.16,0.21)    |
| <b>Tropical Latin America</b>       | 124,283.01(99,345.58,154,240.86)             | 50.28(40.36,62.45)       | 0.66(0.65,0.68)       | 20,016.57(12,717.44,28,846.77)              | 8.07(5.12,11.53)                    | 0.68(0.66,0.71)    |
| <b>Western Europe</b>               | 612,860.76(484,247.04,773,724.43)            | 85.86(68.38,107.94)      | 0.24(0.19,0.29)       | 145,463.18(92,307.49,212,130.50)            | 18.90(11.89,27.49)                  | 0.44(0.4,0.49)     |
| <b>Western Sub-Saharan Africa</b>   | 202,296.15(160,151.18,251,195.77)            | 87.29(69.87,109.95)      | -0.1(-0.13,-0.07)     | 30,985.58(19,518.62,44,580.00)              | 13.96(8.80,20.21)                   | -0.07(-0.11,-0.04) |



**Table S6.** The numbers (2019), ASRs per 100,000 (2019), and AAPCs (1990-2019) in incidence, death and DALY for MSK disorders in 21 GBD regions

| Characteristic<br>Regions           | Incident cases                                 |                                 |                        | Deaths                             |                     |                        | DALYs                                          |                                           |                        |
|-------------------------------------|------------------------------------------------|---------------------------------|------------------------|------------------------------------|---------------------|------------------------|------------------------------------------------|-------------------------------------------|------------------------|
|                                     | Numbers<br>(95% UI)                            | ASIR<br>(95% UI)                | AAPC<br>(95% CI)       | Numbers<br>(95% UI)                | ASDR<br>(95% UI)    | AAPC<br>(95% CI)       | Numbers<br>(95% UI)                            | Age-standardized DALY<br>rate<br>(95% UI) | AAPC<br>(95% CI)       |
| <b>Andean Latin America</b>         | 2,124,831.77<br>(1,929,116.59,2,334,736.34)    | 3,462.67<br>(3,150.12,3,793.50) | 0.05<br>(0.04,0.05)    | 755.85<br>(538.55,920.13)          | 1.35<br>(0.97,1.64) | 0.34<br>(0.02,0.66)    | 989,876.13<br>(711,814.81,1,311,442.11)        | 1,625.98<br>(1,166.78,2,152.01)           | 0.25<br>(0.23,0.27)    |
| <b>Australasia</b>                  | 1,389,819.50<br>(1,271,341.91,1,524,169.69)    | 3,863.70<br>(3,506.94,4,243.55) | -0.05<br>(-0.06,-0.04) | 1,111.16<br>(740.49,1,457.67)      | 2.08<br>(1.42,2.78) | -0.39<br>(-0.54,-0.24) | 804,649.21<br>(576,926.68,1,080,389.62)        | 2,106.26<br>(1,511.47,2,814.37)           | 0.04<br>(0.01,0.07)    |
| <b>Caribbean</b>                    | 1,807,955.85<br>(1,645,866.24,1,985,505.06)    | 3,602.07<br>(3,273.90,3,955.29) | 0.00<br>(0.00,0.00)    | 923.88<br>(691.62,1,168.18)        | 1.81<br>(1.36,2.27) | 0.33<br>(0.06,0.59)    | 772,013.29<br>(556,179.86,1,023,220.93)        | 1,527.73<br>(1,102.38,2,011.44)           | 0.18<br>(0.15,0.2)     |
| <b>Central Asia</b>                 | 3,536,603.51<br>(3,190,284.98,3,928,397.50)    | 3,980.91<br>(3,605.17,4,404.34) | -0.01<br>(-0.01,-0.01) | 537.48<br>(366.86,651.35)          | 0.76<br>(0.48,0.89) | 1.3<br>(0.77,1.83)     | 1,199,329.20<br>(851,071.72,1,598,322.54)      | 1,374.86<br>(970.61,1,830.58)             | 0.11<br>(0.1,0.12)     |
| <b>Central Europe</b>               | 7,521,786.59<br>(6,825,661.83,8,362,081.70)    | 4,943.04<br>(4,454.37,5,503.99) | -0.04<br>(-0.05,-0.04) | 1,574.88<br>(1,132.81,2,086.10)    | 0.78<br>(0.57,1.04) | -0.65<br>(-0.76,-0.54) | 2,503,816.51<br>(1,790,051.70,3,355,018.47)    | 1,582.41<br>(1,132.12,2,106.53)           | 0.06<br>(0.04,0.07)    |
| <b>Central Latin America</b>        | 9,640,825.97<br>(8,725,809.17,10,711,007.32)   | 3,803.04<br>(3,448.11,4,215.71) | 0.04<br>(0.03,0.04)    | 5,844.46<br>(4,026.12,8,074.91)    | 2.44<br>(1.68,3.37) | -0.05<br>(-0.13,0.03)  | 4,959,147.36<br>(3,584,204.26,6,527,512.29)    | 1,965.55<br>(1,420.99,2,589.11)           | 0.19<br>(0.16,0.22)    |
| <b>Central Sub-Saharan Africa</b>   | 3,159,810.14<br>(2,825,437.47,3,526,491.36)    | 3,655.93<br>(3,308.55,4,047.56) | -0.01<br>(-0.02,-0.01) | 818.75<br>(519.04,1,065.27)        | 1.46<br>(0.95,1.86) | -0.07<br>(-0.18,0.05)  | 1,105,387.61<br>(779,915.94,1,466,511.31)      | 1,356.64<br>(966.16,1,811.92)             | 0.06<br>(0.05,0.07)    |
| <b>East Asia</b>                    | 71,951,527.64<br>(65,200,896.43,79,027,714.61) | 3,795.47<br>(3,457.87,4,147.66) | -0.66<br>(-0.69,-0.62) | 21,098.66<br>(16,371.21,24,719.59) | 1.20<br>(0.93,1.40) | 0.5<br>(0.03,0.97)     | 31,141,203.48<br>(22,297,152.19,41,442,115.78) | 1,594.73<br>(1,146.92,2,125.13)           | -0.23<br>(-0.32,-0.13) |
| <b>Eastern Europe</b>               | 13,516,875.97<br>(12,280,678.65,14,945,565.29) | 4,889.81<br>(4,441.15,5,383.92) | -0.03<br>(-0.04,-0.03) | 2,532.93<br>(1,506.90,3,150.90)    | 0.80<br>(0.49,1.00) | 0.65<br>(-0.06,1.36)   | 4,718,459.14<br>(3,322,329.76,6,404,083.84)    | 1,638.58<br>(1,157.70,2,216.32)           | 0.07<br>(0.04,0.1)     |
| <b>Eastern Sub-Saharan Africa</b>   | 9,326,932.43<br>(8,349,744.82,10,381,406.63)   | 3,565.53<br>(3,235.83,3,944.93) | -0.00<br>(-0.01,0.00)  | 1,704.89<br>(1,034.08,2,532.31)    | 1.12<br>(0.60,1.68) | 0.02<br>(-0.07,0.11)   | 3,211,695.65<br>(2,288,969.54,4,272,577.68)    | 1,295.62<br>(918.67,1,729.50)             | 0.16<br>(0.15,0.17)    |
| <b>High-income Asia Pacific</b>     | 11,159,720.40<br>(10,200,857.94,12,252,574.24) | 4,226.22<br>(3,843.57,4,641.09) | -0.14<br>(-0.15,-0.13) | 5,138.84<br>(3,190.73,6,074.94)    | 1.08<br>(0.77,1.30) | -1.51<br>(-1.65,-1.36) | 6,593,847.93<br>(4,684,461.62,8,826,823.36)    | 2,305.85<br>(1,648.65,3,067.08)           | -0.04<br>(-0.08,0)     |
| <b>High-income North America</b>    | 23,831,134.59<br>(22,032,170.91,25,813,227.31) | 5,321.53<br>(4,902.93,5,808.64) | 0.00<br>(-0.06,0.06)   | 12,028.50<br>(8,885.68,18,060.80)  | 1.96<br>(1.47,2.98) | -0.06<br>(-0.27,0.15)  | 15,257,313.27<br>(11,088,861.01,19,974,284.57) | 3,260.82<br>(2,374.13,4,262.54)           | 0.21<br>(0.17,0.25)    |
| <b>North Africa and Middle East</b> | 24,998,455.01<br>(22,460,065.51,27,878,872.96) | 4,399.09<br>(3,988.07,4,855.03) | -0.08<br>(-0.08,-0.07) | 3,596.97<br>(2,689.38,4,284.91)    | 0.83<br>(0.60,0.97) | 0.59<br>(0.46,0.72)    | 9,959,908.88<br>(7,136,729.29,13,201,312.86)   | 1,781.99<br>(1,278.47,2,366.16)           | 0.16<br>(0.15,0.18)    |
| <b>Oceania</b>                      | 527,624.06<br>(472,620.79,589,515.65)          | 5,060.50<br>(4,585.20,5,584.34) | 0.02<br>(0.02,0.03)    | 60.98<br>(39.86,79.10)             | 0.70<br>(0.47,0.89) | 0.69<br>(0.6,0.79)     | 184,152.98<br>(132,601.89,244,102.33)          | 1,799.22<br>(1,303.28,2,376.50)           | 0.09<br>(0.08,0.09)    |
| <b>South Asia</b>                   | 53,661,124.34<br>(48,453,940.52,59,344,311.93) | 3,265.04<br>(2,960.31,3,599.55) | -0.53<br>(-0.58,-0.48) | 31,047.48<br>(23,965.51,36,797.08) | 2.72<br>(2.12,3.24) | 0.42<br>(-0.18,1.04)   | 28,464,103.81<br>(20,627,280.15,36,929,545.54) | 1,730.66<br>(1,261.71,2,241.70)           | 0.04<br>(0.01,0.06)    |

|                                    |                                                |                                 |                        |                                   |                     |                        |                                               |                                 |                        |
|------------------------------------|------------------------------------------------|---------------------------------|------------------------|-----------------------------------|---------------------|------------------------|-----------------------------------------------|---------------------------------|------------------------|
| <b>Southeast Asia</b>              | 33,376,132.26<br>(30,086,201.57,37,046,519.57) | 4,841.91<br>(4,384.08,5,344.67) | -0.03<br>(-0.04,-0.02) | 5,881.22<br>(4,123.25,7,573.06)   | 0.96<br>(0.69,1.22) | 1.31<br>(1.22,1.4)     | 13,506,405.09<br>(9,708,791.89,17,979,002.65) | 1,948.77<br>(1,402.95,2,588.72) | 0.17<br>(0.15,0.19)    |
| <b>Southern Latin America</b>      | 2,649,861.65<br>(2,413,391.32,2,907,287.24)    | 3,553.59<br>(3,229.15,3,893.14) | 0.07<br>(0.06,0.07)    | 1,166.09<br>(777.29,1,651.27)     | 1.44<br>(0.95,2.01) | -1.50<br>(-1.81,-1.19) | 1,697,024.02<br>(1,219,721.11,2,252,494.55)   | 2,234.83<br>(1,612.87,2,961.34) | 0.17<br>(0.14,0.19)    |
| <b>Southern Sub-Saharan Africa</b> | 2,379,441.44<br>(2,160,900.77,2,629,160.03)    | 3,437.99<br>(3,138.20,3,791.12) | -0.09<br>(-0.1,-0.08)  | 1,088.44<br>(931.53,1,357.51)     | 1.97<br>(1.67,2.45) | -0.1<br>(-0.47,0.28)   | 970,279.71<br>(709,410.11,1,279,001.92)       | 1,422.06<br>(1,030.65,1,875.26) | 0.04<br>(0.02,0.07)    |
| <b>Tropical Latin America</b>      | 10,469,670.63<br>(9,444,863.44,11,568,759.92)  | 4,283.23<br>(3,867.76,4,731.62) | 0.05<br>(0.04,0.05)    | 3,545.56<br>(2,406.42,4,963.31)   | 1.49<br>(1.02,2.10) | 0.35<br>(0.26,0.43)    | 4,931,275.17<br>(3,572,557.17,6,483,034.68)   | 1,993.24<br>(1,445.64,2,622.64) | -0.02<br>(-0.04,0)     |
| <b>Western Europe</b>              | 23,973,824.31<br>(21,867,476.90,26,285,571.19) | 4,231.51<br>(3,844.50,4,639.40) | -0.04<br>(-0.06,-0.02) | 15,291.65<br>(9,721.19,19,538.63) | 1.47<br>(0.99,1.92) | -0.85<br>(-1,-0.7)     | 12,955,640.03<br>(9,297,130.38,17,201,764.39) | 2,129.45<br>(1,533.56,2,814.77) | -0.03<br>(-0.04,-0.02) |
| <b>Western Sub-Saharan Africa</b>  | 11,745,466.56<br>(10,516,897.86,13,040,169.60) | 3,849.31<br>(3,494.09,4,244.17) | 0.03<br>(0.02,0.04)    | 1,794.29<br>(1,154.39,2,386.12)   | 0.82<br>(0.55,1.04) | 1.15<br>(1.04,1.25)    | 4,149,801.43<br>(2,976,319.63,5,494,791.53)   | 1,435.57<br>(1,022.98,1,907.48) | 0.19<br>(0.19,0.2)     |

ASIR: age-standardized incidence rate; ASDR: age-standardized death rate; AAPC: average annual percentage change; SDI: social demographic index; CI: confidence interval; UI: uncertainty interval;

**Table S7.** The numbers (2019), ASRs per 100,000 (2019), and AAPCs (1990-2019) in incidence, death and DALY for MSK disorders in 204 countries.

| Characteristic             | Incident cases                              |                                 |                        | Deaths                          |                     |                        | DALYs                                     |                                           |                        |
|----------------------------|---------------------------------------------|---------------------------------|------------------------|---------------------------------|---------------------|------------------------|-------------------------------------------|-------------------------------------------|------------------------|
|                            | Numbers<br>(95% UI)                         | ASIR<br>(95% UI)                | AAPC<br>(95% CI)       | Numbers<br>(95% UI)             | ASDR<br>(95% UI)    | AAPC<br>(95% CI)       | Numbers<br>(95% UI)                       | Age-standardized DALY<br>rate<br>(95% UI) | AAPC<br>(95% CI)       |
| <b>Afghanistan</b>         | 1,015,272.00<br>(904,031.95,1,144,326.51)   | 4,190.33<br>(3,784.93,4,633.00) | 0.04<br>(0.03,0.04)    | 168.63<br>(111.06,248.42)       | 1.00<br>(0.67,1.48) | 1.14<br>(1.08,1.2)     | 109,587.59<br>(76,180.57,147,101.74)      | 1,408.71<br>(980.40,1,898.99)             | 0.10<br>(0.09,0.11)    |
| <b>Albania</b>             | 163,299.22<br>(147,417.25,181,653.58)       | 4,887.89<br>(4,420.49,5,428.63) | -0.02<br>(-0.03,-0.02) | 34.56<br>(16.56,49.21)          | 0.87<br>(0.42,1.23) | 1.81<br>(1.09,2.53)    | 41,087.60<br>(28,776.09,54,794.75)        | 1,567.09<br>(1,106.77,2,088.30)           | 0.11<br>(0.11,0.12)    |
| <b>Algeria</b>             | 1,721,265.05<br>(1,544,648.36,1,916,682.41) | 4,213.01<br>(3,800.69,4,670.39) | -0.01<br>(-0.01,0)     | 237.93<br>(155.60,305.31)       | 0.74<br>(0.47,0.93) | 1.00<br>(0.91,1.09)    | 270,867.66<br>(194,237.59,360,057.24)     | 1,747.65<br>(1,259.36,2,322.13)           | 0.26<br>(0.26,0.27)    |
| <b>American Samoa</b>      | 2,710.03<br>(2,447.18,2,989.94)             | 5,146.29<br>(4,676.70,5,668.86) | 0.03<br>(0.02,0.03)    | 0.69<br>(0.53,0.88)             | 1.47<br>(1.14,1.87) | 1.45<br>(0.96,1.94)    | 632.00<br>(454.52,834.68)                 | 1,918.25<br>(1,395.95,2,535.77)           | 0.13<br>(0.12,0.15)    |
| <b>Andorra</b>             | 4,564.62<br>(4,138.75,5,031.92)             | 4,116.23<br>(3,735.39,4,515.26) | 0.03<br>(0.01,0.05)    | 0.72<br>(0.49,0.95)             | 0.50<br>(0.35,0.67) | 0.25<br>(0.13,0.37)    | 1,291.79<br>(917.70,1,726.76)             | 2,151.75<br>(1,521.77,2,879.86)           | 0.04<br>(0.02,0.06)    |
| <b>Angola</b>              | 693,737.41<br>(619,689.44,775,264.35)       | 3,673.21<br>(3,311.61,4,078.95) | 0.01<br>(0.01,0.01)    | 166.34<br>(109.74,222.87)       | 1.41<br>(0.97,1.85) | -0.01<br>(-0.16,0.13)  | 75,497.52<br>(53,544.42,100,344.71)       | 1,328.28<br>(921.00,1,789.45)             | 0.18<br>(0.17,0.19)    |
| <b>Antigua and Barbuda</b> | 3,656.57<br>(3,319.49,4,048.67)             | 3,567.18<br>(3,229.68,3,939.27) | 0.00<br>(0.00,0.01)    | 1.98<br>(1.29,2.82)             | 2.22<br>(1.42,3.11) | 0.56<br>(0.1,1.02)     | 816.50<br>(591.33,1,077.62)               | 1,569.12<br>(1,133.18,2,063.36)           | 0.16<br>(0.15,0.18)    |
| <b>Argentina</b>           | 1,742,646.84<br>(1,585,621.59,1,912,812.53) | 3,548.62<br>(3,222.32,3,885.42) | 0.06<br>(0.05,0.07)    | 691.59<br>(467.27,1,010.31)     | 1.32<br>(0.88,1.89) | -1.87<br>(-2.24,-1.51) | 669,453.32<br>(480,393.35,895,744.65)     | 2,224.31<br>(1,603.72,2,948.24)           | 0.22<br>(0.18,0.26)    |
| <b>Armenia</b>             | 151,653.80<br>(137,026.42,168,257.51)       | 4,178.48<br>(3,775.94,4,622.37) | 0.01<br>(0.01,0.01)    | 16.55<br>(6.08,23.17)           | 0.42<br>(0.16,0.59) | 3.9<br>(3.24,4.56)     | 40,635.98<br>(28,584.71,54,408.75)        | 1,424.55<br>(1,013.37,1,902.31)           | 0.25<br>(0.24,0.25)    |
| <b>Australia</b>           | 1,160,571.85<br>(1,061,122.56,1,272,249.40) | 3,822.21<br>(3,470.37,4,196.80) | -0.04<br>(-0.06,-0.02) | 920.58<br>(597.84,1,186.11)     | 2.03<br>(1.36,2.68) | -0.43<br>(-0.65,-0.22) | 399,959.77<br>(289,250.14,527,922.64)     | 2,169.18<br>(1,559.88,2,889.33)           | 0.05<br>(0.02,0.09)    |
| <b>Austria</b>             | 452,323.09<br>(413,031.04,496,147.18)       | 3,850.55<br>(3,491.79,4,211.15) | -0.07<br>(-0.09,-0.05) | 210.49<br>(163.99,367.46)       | 1.09<br>(0.87,1.84) | -1.37<br>(-1.77,-0.98) | 192,880.70<br>(137,191.59,257,042.31)     | 1,971.48<br>(1,413.43,2,650.16)           | -0.05<br>(-0.07,-0.02) |
| <b>Azerbaijan</b>          | 437,722.38<br>(393,717.49,488,811.41)       | 4,005.55<br>(3,623.21,4,438.25) | 0.03<br>(0.03,0.04)    | 17.15<br>(10.94,21.52)          | 0.21<br>(0.13,0.27) | 2.73<br>(2.46,2.99)    | 78,112.39<br>(55,288.99,104,007.91)       | 1,362.81<br>(954.69,1,829.71)             | 0.11<br>(0.1,0.12)     |
| <b>Bahamas</b>             | 14,990.08<br>(13,493.78,16,611.63)          | 3,580.03<br>(3,238.31,3,958.62) | -0.02<br>(-0.03,-0.02) | 12.58<br>(8.44,19.41)           | 3.38<br>(2.26,5.15) | -0.31<br>(-0.58,-0.03) | 3,381.69<br>(2,476.11,4,398.87)           | 1,652.75<br>(1,209.12,2,154.94)           | 0.09<br>(0.07,0.12)    |
| <b>Bahrain</b>             | 71,869.75<br>(63,347.17,81,057.16)          | 4,212.38<br>(3,800.25,4,647.03) | 0.00<br>(0.00,0.01)    | 14.41<br>(9.15,18.43)           | 1.43<br>(1.02,1.76) | 1.7<br>(1.09,2.32)     | 6,323.06<br>(4,516.27,8,408.09)           | 1,779.15<br>(1,293.03,2,342.43)           | 0.27<br>(0.25,0.29)    |
| <b>Bangladesh</b>          | 5,510,214.19<br>(4,956,837.84,6,104,956.70) | 3,672.59<br>(3,314.50,4,058.91) | -0.14<br>(-0.15,-0.13) | 2,059.29<br>(1,456.68,2,942.46) | 1.88<br>(1.34,2.67) | -0.19<br>(-0.94,0.56)  | 1,265,368.32<br>(906,654.83,1,641,252.82) | 1,977.54<br>(1,437.66,2,592.98)           | 0.22<br>(0.21,0.24)    |
| <b>Barbados</b>            | 13,932.20                                   | 3,606.59                        | 0.01                   | 15.92                           | 3.70                | -0.06                  | 4,226.21                                  | 1,663.79                                  | 0.12                   |

|                                             |                                               |                                 |                        |                                 |                     |                        |                                             |                                 |                        |
|---------------------------------------------|-----------------------------------------------|---------------------------------|------------------------|---------------------------------|---------------------|------------------------|---------------------------------------------|---------------------------------|------------------------|
|                                             | (12,639.54,15,461.84)                         | (3,269.46,3,998.34)             | (0,0.01)               | (10.93,23.74)                   | (2.55,5.51)         | (-0.4,0.29)            | (3,102.75,5,535.81)                         | (1,216.93,2,165.19)             | (0.09,0.14)            |
| <b>Belarus</b>                              | 571,278.57<br>(517,877.18,635,437.53)         | 4,551.79<br>(4,110.61,5,047.64) | 0.00<br>(0.00,0.01)    | 36.51<br>(16.37,52.24)          | 0.24<br>(0.11,0.34) | 2.4<br>(2.15,2.65)     | 170,257.29<br>(120,057.43,230,433.27)       | 1,482.18<br>(1,045.50,1,991.87) | 0.14<br>(0.13,0.15)    |
| <b>Belgium</b>                              | 584,047.55<br>(533,190.79,640,311.13)         | 4,021.56<br>(3,646.48,4,422.49) | 0.01<br>(-0.01,0.03)   | 362.32<br>(220.83,442.24)       | 1.37<br>(0.88,1.72) | -0.47<br>(-0.75,-0.2)  | 252,201.78<br>(180,692.87,338,387.19)       | 2,042.19<br>(1,461.10,2,728.92) | 0.01<br>(0,0.03)       |
| <b>Belize</b>                               | 13,348.83<br>(12,015.83,14,879.53)            | 3,634.46<br>(3,296.84,4,014.09) | 0.03<br>(0.03,0.04)    | 6.44<br>(4.47,9.79)             | 2.01<br>(1.39,3.04) | 0.84<br>(0.49,1.19)    | 1,782.99<br>(1,284.21,2,339.10)             | 1,559.92<br>(1,126.33,2,069.97) | 0.23<br>(0.21,0.26)    |
| <b>Benin</b>                                | 296,817.89<br>(264,722.54,330,839.45)         | 3,698.11<br>(3,366.82,4,083.22) | 0.03<br>(0.03,0.04)    | 48.31<br>(30.88,66.19)          | 0.82<br>(0.54,1.08) | 0.86<br>(0.73,0.99)    | 35,401.53<br>(25,393.47,47,010.10)          | 1,353.05<br>(965.48,1,806.76)   | 0.23<br>(0.22,0.23)    |
| <b>Bermuda</b>                              | 3,314.19<br>(3,007.95,3,677.93)               | 3,643.32<br>(3,306.41,4,032.25) | -0.02<br>(-0.02,-0.02) | 2.19<br>(1.32,3.00)             | 1.73<br>(1.10,2.43) | -1.11<br>(-1.28,-0.94) | 1,035.20<br>(745.47,1,369.67)               | 1,626.77<br>(1,169.10,2,137.58) | 0.13<br>(0.12,0.14)    |
| <b>Bhutan</b>                               | 25,755.00<br>(23,196.90,28,559.66)            | 3,708.47<br>(3,366.54,4,092.53) | -0.00<br>(-0.01,0.00)  | 11.59<br>(7.63,17.50)           | 2.49<br>(1.67,3.75) | 0.91<br>(0.86,0.96)    | 6,294.92<br>(4,513.15,8,274.23)             | 1,830.46<br>(1,331.73,2,384.11) | 0.36<br>(0.35,0.37)    |
| <b>Bolivia<br/>(Plurinational State of)</b> | 374,995.65<br>(336,899.39,416,598.81)         | 3,535.64<br>(3,195.57,3,905.41) | 0.01<br>(0.00,0.01)    | 156.97<br>(108.21,206.16)       | 1.99<br>(1.41,2.54) | 0.68<br>(0.6,0.76)     | 66,574.76<br>(48,010.19,87,106.84)          | 1,631.12<br>(1,176.59,2,149.92) | 0.25<br>(0.24,0.26)    |
| <b>Bosnia and Herzegovina</b>               | 203,020.79<br>(183,311.56,226,062.87)         | 4,588.92<br>(4,135.46,5,102.29) | 0.05<br>(0.04,0.06)    | 43.02<br>(26.63,56.08)          | 0.82<br>(0.50,1.06) | 0.43<br>(-0.23,1.1)    | 62,806.78<br>(44,514.25,83,690.76)          | 1,432.70<br>(1,019.69,1,903.00) | 0.17<br>(0.15,0.18)    |
| <b>Botswana</b>                             | 67,155.57<br>(60,555.99,74,844.16)            | 3,422.99<br>(3,111.81,3,781.74) | 0.02<br>(0.00,0.03)    | 27.72<br>(16.97,39.65)          | 2.00<br>(1.20,2.79) | 0.67<br>(0.47,0.87)    | 10,522.56<br>(7,645.90,13,974.55)           | 1,411.84<br>(1,025.45,1,870.03) | 0.2<br>(0.19,0.22)     |
| <b>Brazil</b>                               | 10,209,414.08<br>(9,212,295.34,11,283,391.37) | 4,292.31<br>(3,875.58,4,742.59) | 0.05<br>(0.04,0.05)    | 3,405.68<br>(2,329.95,4,854.44) | 1.47<br>(1.01,2.11) | 0.24<br>(0.14,0.34)    | 2,407,573.45<br>(1,750,650.28,3,122,040.71) | 1,995.42<br>(1,446.24,2,624.39) | -0.02<br>(-0.05,0)     |
| <b>Brunei Darussalam</b>                    | 17,295.37<br>(15,519.39,19,233.64)            | 3,844.88<br>(3,481.06,4,211.42) | 0.06<br>(0.05,0.07)    | 5.43<br>(4.47,6.97)             | 2.68<br>(1.85,3.20) | 0.1<br>(-0.17,0.37)    | 3,773.88<br>(2,698.47,5,022.56)             | 2,175.90<br>(1,566.45,2,894.64) | 0.25<br>(0.23,0.27)    |
| <b>Bulgaria</b>                             | 468,443.07<br>(423,550.44,521,637.89)         | 4,879.30<br>(4,419.07,5,465.12) | -0.02<br>(-0.03,-0.01) | 53.08<br>(32.14,71.07)          | 0.41<br>(0.25,0.56) | 1.38<br>(0.71,2.05)    | 160,721.60<br>(114,139.95,215,297.29)       | 1,544.31<br>(1,095.86,2,060.92) | 0.09<br>(0.08,0.09)    |
| <b>Burkina Faso</b>                         | 533,726.76<br>(478,035.76,595,168.68)         | 3,651.49<br>(3,302.27,4,025.17) | 0.07<br>(0.06,0.07)    | 81.65<br>(51.80,108.87)         | 0.78<br>(0.50,1.01) | 0.78<br>(0.65,0.91)    | 74,000.94<br>(53,163.29,97,822.78)          | 1,365.28<br>(978.15,1,830.98)   | 0.2<br>(0.2,0.21)      |
| <b>Burundi</b>                              | 263,223.88<br>(236,106.34,292,772.50)         | 3,554.80<br>(3,223.06,3,930.92) | 0.05<br>(0.04,0.06)    | 44.12<br>(26.69,69.76)          | 1.03<br>(0.55,1.64) | -0.42<br>(-0.71,-0.13) | 39,707.76<br>(28,604.04,52,614.38)          | 1,141.53<br>(807.17,1,542.26)   | -0.25<br>(-0.27,-0.24) |
| <b>Cabo Verde</b>                           | 18,598.94<br>(16,719.88,20,658.04)            | 3,617.09<br>(3,266.45,4,002.58) | 0.02<br>(0.02,0.03)    | 3.17<br>(2.29,3.93)             | 0.74<br>(0.53,0.93) | 1.59<br>(1.41,1.78)    | 3,189.66<br>(2,251.98,4,267.40)             | 1,391.40<br>(1,001.48,1,850.27) | 0.17<br>(0.16,0.18)    |
| <b>Cambodia</b>                             | 714,929.47<br>(644,952.30,793,502.32)         | 4,810.18<br>(4,355.00,5,316.90) | -0.14<br>(-0.14,-0.13) | 104.73<br>(70.68,131.04)        | 0.82<br>(0.57,1.02) | 1.1<br>(1.05,1.14)     | 116,584.85<br>(82,880.67,157,207.33)        | 1,847.24<br>(1,323.05,2,458.64) | 0.1<br>(0.1,0.11)      |
| <b>Cameroon</b>                             | 752,905.80<br>(672,475.67,838,360.81)         | 3,804.37<br>(3,441.61,4,205.42) | -0.00<br>(-0.01,0.01)  | 157.20<br>(91.46,236.32)        | 1.07<br>(0.67,1.50) | 1.12<br>(1.04,1.2)     | 86,890.20<br>(62,314.48,114,798.27)         | 1,436.08<br>(1,030.63,1,920.37) | 0.19<br>(0.19,0.2)     |
| <b>Canada</b>                               | 1,884,245.91                                  | 3,996.21                        | 0.25                   | 1,176.32                        | 1.67                | -0.06                  | 758,443.27                                  | 2,648.35                        | 0.26                   |

|                                              |                                                |                                 |                        |                                    |                     |                        |                                                |                                 |                        |
|----------------------------------------------|------------------------------------------------|---------------------------------|------------------------|------------------------------------|---------------------|------------------------|------------------------------------------------|---------------------------------|------------------------|
|                                              | (1,714,759.64,2,071,020.14)                    | (3,623.69,4,385.92)             | (0.14,0.36)            | (645.26,1,435.64)                  | (0.96,2.00)         | (-0.27,0.15)           | (550,555.07,992,467.22)                        | (1,914.73,3,458.20)             | (0.23,0.28)            |
| <b>Central African Republic</b>              | 130,318.93<br>(116,127.20,146,603.93)          | 3,674.99<br>(3,323.57,4,074.68) | 0.00<br>(-0.00,0.01)   | 35.57<br>(24.06,47.78)             | 1.52<br>(1.04,2.02) | -0.31<br>(-0.46,-0.16) | 22,638.52<br>(16,376.57,29,881.12)             | 1,328.23<br>(951.36,1,776.97)   | -0.03<br>(-0.05,-0.01) |
| <b>Chad</b>                                  | 362,310.73<br>(322,905.82,405,146.62)          | 3,790.12<br>(3,444.14,4,190.97) | 0.01<br>(-0.00,0.02)   | 49.04<br>(31.03,65.09)             | 0.72<br>(0.47,0.95) | 0.91<br>(0.76,1.05)    | 47,677.57<br>(33,764.72,63,671.61)             | 1,336.78<br>(938.75,1,794.16)   | 0.09<br>(0.08,0.1)     |
| <b>Chile</b>                                 | 760,526.92<br>(693,027.55,838,129.75)          | 3,556.06<br>(3,228.98,3,909.71) | 0.07<br>(0.06,0.08)    | 416.90<br>(253.78,533.80)          | 1.80<br>(1.10,2.32) | 0.21<br>(0.03,0.39)    | 269,176.32<br>(192,839.60,356,015.08)          | 2,262.15<br>(1,633.10,2,989.70) | -0.02<br>(-0.05,0.01)  |
| <b>China</b>                                 | 68,991,473.33<br>(62,484,630.29,75,824,082.38) | 3,764.99<br>(3,430.49,4,114.81) | -0.68<br>(-0.72,-0.63) | 20,141.07<br>(15,648.86,23,766.76) | 1.20<br>(0.91,1.40) | 0.5<br>(0.03,0.97)     | 17,519,469.73<br>(12,642,451.56,23,304,319.62) | 1,585.44<br>(1,140.01,2,111.61) | -0.22<br>(-0.28,-0.16) |
| <b>Colombia</b>                              | 2,065,675.59<br>(1,867,695.11,2,280,859.68)    | 4,024.47<br>(3,638.01,4,450.64) | 0.05<br>(0.04,0.06)    | 1,045.77<br>(620.64,1,477.35)      | 2.00<br>(1.16,2.81) | 0.37<br>(-0.29,1.04)   | 464,720.52<br>(335,858.52,613,092.96)          | 2,022.83<br>(1,470.88,2,671.89) | 0.31<br>(0.3,0.33)     |
| <b>Comoros</b>                               | 21,874.93<br>(19,764.46,24,368.28)             | 3,628.08<br>(3,301.11,4,016.99) | 0.04<br>(0.03,0.05)    | 4.99<br>(2.82,7.79)                | 1.10<br>(0.58,1.71) | 0.25<br>(-0.17,0.68)   | 3,522.56<br>(2,536.08,4,731.37)                | 1,342.50<br>(964.87,1,792.33)   | 0.29<br>(0.26,0.31)    |
| <b>Congo</b>                                 | 145,997.52<br>(130,801.93,163,329.29)          | 3,651.51<br>(3,311.23,4,033.93) | 0.01<br>(0.01,0.02)    | 49.68<br>(29.49,71.28)             | 1.85<br>(1.23,2.41) | -0.16<br>(-0.36,0.04)  | 20,558.50<br>(14,866.04,27,082.78)             | 1,396.85<br>(998.61,1,863.02)   | 0.04<br>(0.02,0.06)    |
| <b>Cook Islands</b>                          | 1,086.28<br>(988.10,1,197.19)                  | 5,150.68<br>(4,665.48,5,673.02) | 0.05<br>(0.04,0.06)    | 0.08<br>(0.05,0.10)                | 0.33<br>(0.21,0.43) | 0.59<br>(0.51,0.67)    | 280.36<br>(200.83,371.51)                      | 1,906.36<br>(1,385.40,2,528.55) | 0.15<br>(0.13,0.17)    |
| <b>Costa Rica</b>                            | 190,863.70<br>(172,735.56,211,550.58)          | 3,722.53<br>(3,365.37,4,121.99) | -0.03<br>(-0.04,-0.02) | 126.13<br>(81.79,189.83)           | 2.43<br>(1.58,3.66) | 0.56<br>(0.23,0.88)    | 43,376.57<br>(31,364.82,56,645.09)             | 1,946.30<br>(1,412.24,2,540.98) | 0.16<br>(0.14,0.19)    |
| <b>Croatia</b>                               | 283,737.98<br>(256,776.84,316,082.51)          | 4,897.32<br>(4,405.58,5,447.43) | -0.09<br>(-0.11,-0.07) | 93.88<br>(49.16,126.77)            | 1.14<br>(0.61,1.54) | 1.02<br>(0.73,1.32)    | 92,389.52<br>(66,803.46,123,472.79)            | 1,600.46<br>(1,140.56,2,116.88) | 0.03<br>(0.02,0.04)    |
| <b>Cuba</b>                                  | 548,669.20<br>(502,768.90,596,873.93)          | 3,664.08<br>(3,352.11,3,973.91) | -0.05<br>(-0.06,-0.04) | 238.10<br>(151.49,367.87)          | 1.35<br>(0.86,2.09) | -0.16<br>(-0.47,0.15)  | 159,896.90<br>(115,856.15,212,018.82)          | 1,594.28<br>(1,154.05,2,103.49) | 0.28<br>(0.25,0.3)     |
| <b>Cyprus</b>                                | 66,413.81<br>(60,495.82,72,982.76)             | 4,159.90<br>(3,780.71,4,573.10) | 0.05<br>(0.04,0.07)    | 35.83<br>(24.27,43.39)             | 2.01<br>(1.36,2.42) | -0.89<br>(-1.26,-0.52) | 17,391.55<br>(12,476.52,23,105.42)             | 2,224.72<br>(1,597.42,2,963.46) | 0.15<br>(0.13,0.16)    |
| <b>Czechia</b>                               | 699,109.31<br>(629,816.39,775,748.39)          | 4,883.83<br>(4,399.89,5,423.43) | -0.04<br>(-0.05,-0.04) | 109.06<br>(60.11,143.12)           | 0.56<br>(0.31,0.73) | 0.64<br>(0.07,1.21)    | 182,565.94<br>(130,709.91,242,764.57)          | 1,547.70<br>(1,109.57,2,064.61) | 0.07<br>(0.04,0.1)     |
| <b>Côte d'Ivoire</b>                         | 666,797.74<br>(596,899.14,745,931.97)          | 3,681.28<br>(3,333.56,4,078.73) | 0.06<br>(0.05,0.06)    | 96.75<br>(61.89,134.38)            | 0.79<br>(0.52,1.03) | 0.67<br>(0.43,0.9)     | 88,520.68<br>(63,338.33,117,649.75)            | 1,358.43<br>(966.80,1,810.15)   | 0.24<br>(0.22,0.25)    |
| <b>Democratic People's Republic of Korea</b> | 1,400,704.34<br>(1,269,091.12,1,548,810.36)    | 4,532.85<br>(4,125.90,4,968.41) | -0.13<br>(-0.13,-0.12) | 462.05<br>(279.44,806.54)          | 1.54<br>(0.95,2.67) | 1.11<br>(1.06,1.16)    | 335,663.20<br>(242,321.97,450,072.14)          | 1,766.18<br>(1,280.77,2,333.41) | -0.02<br>(-0.03,-0.01) |
| <b>Democratic Republic of the Congo</b>      | 2,104,596.15<br>(1,881,734.91,2,348,439.10)    | 3,649.17<br>(3,303.01,4,043.47) | -0.02<br>(-0.04,-0.01) | 539.06<br>(330.58,737.35)          | 1.43<br>(0.90,1.90) | -0.13<br>(-0.21,-0.06) | 307,473.86<br>(221,423.53,407,539.49)          | 1,359.78<br>(975.64,1,808.55)   | 0.03<br>(0.02,0.05)    |

|                           |                                             |                                 |                         |                                 |                     |                        |                                           |                                 |                      |
|---------------------------|---------------------------------------------|---------------------------------|-------------------------|---------------------------------|---------------------|------------------------|-------------------------------------------|---------------------------------|----------------------|
| <b>Denmark</b>            | 291,691.98<br>(262,856.59,325,367.07)       | 3,972.54<br>(3,561.08,4,418.36) | -0.03<br>(-0.05,-0.01)  | 300.20<br>(183.13,370.16)       | 2.40<br>(1.53,3.00) | 0.27<br>(-0.03,0.58)   | 159,466.80<br>(114,769.45,211,850.88)     | 2,485.00<br>(1,781.44,3,292.01) | 0<br>(-0.02,0.02)    |
| <b>Djibouti</b>           | 32,383.37<br>(29,032.92,36,312.13)          | 3,453.75<br>(3,140.60,3,829.07) | 0.02<br>(0.01,0.02)     | 5.81<br>(3.19,9.73)             | 1.16<br>(0.60,1.89) | 0.57<br>(0.32,0.82)    | 3,137.13<br>(2,242.30,4,183.23)           | 1,280.88<br>(912.43,1,710.26)   | 0.21<br>(0.2,0.23)   |
| <b>Dominica</b>           | 2,835.72<br>(2,563.77,3,128.09)             | 3,580.40<br>(3,232.22,3,950.16) | -0.04<br>(-0.05,-0.04)  | 1.60<br>(1.22,2.07)             | 1.92<br>(1.46,2.48) | 0.4<br>(0.25,0.56)     | 997.86<br>(719.53,1,315.18)               | 1,563.85<br>(1,134.66,2,070.74) | 0.11<br>(0.09,0.12)  |
| <b>Dominican Republic</b> | 368,369.67<br>(331,692.60,407,681.30)       | 3,520.46<br>(3,184.47,3,884.58) | 0.10<br>(0.09,0.11)     | 198.30<br>(115.14,263.97)       | 2.32<br>(1.25,3.08) | 0.91<br>(0.35,1.48)    | 71,025.33<br>(50,849.85,93,642.76)        | 1,492.18<br>(1,075.62,1,987.16) | 0.27<br>(0.25,0.29)  |
| <b>Ecuador</b>            | 571,186.05<br>(525,132.50,618,601.60)       | 3,409.86<br>(3,139.39,3,692.16) | -0.03<br>(-0.05,-0.02)  | 328.27<br>(246.12,436.01)       | 2.32<br>(1.78,3.12) | 0.92<br>(0.66,1.19)    | 111,296.21<br>(80,021.18,146,847.89)      | 1,654.69<br>(1,196.43,2,179.21) | 0.22<br>(0.18,0.25)  |
| <b>Egypt</b>              | 3,687,532.57<br>(3,321,180.69,4,103,672.23) | 4,293.89<br>(3,889.28,4,741.65) | 0.07<br>(0.07,0.07)     | 252.70<br>(165.31,361.37)       | 0.41<br>(0.27,0.57) | 0.69<br>(0.08,1.3)     | 647,866.21<br>(463,912.38,864,787.21)     | 1,775.16<br>(1,272.61,2,353.61) | 0.3<br>(0.3,0.31)    |
| <b>El Salvador</b>        | 231,983.94<br>(208,809.16,257,658.35)       | 3,789.22<br>(3,417.24,4,191.47) | 0.07<br>(0.07,0.08)     | 89.26<br>(64.34,121.90)         | 1.39<br>(1.00,1.90) | -0.07<br>(-0.58,0.44)  | 59,597.25<br>(42,179.49,79,165.48)        | 1,783.25<br>(1,268.45,2,366.72) | 0.4<br>(0.37,0.42)   |
| <b>Equatorial Guinea</b>  | 32,949.86<br>(29,160.93,36,839.08)          | 3,654.63<br>(3,310.36,4,033.21) | -0.0<br>(-0.01,-0.00)   | 8.73<br>(5.14,13.58)            | 1.65<br>(1.05,2.45) | 0.23<br>(0.12,0.35)    | 3,451.47<br>(2,504.20,4,563.53)           | 1,477.35<br>(1,068.33,1,963.65) | 0.41<br>(0.39,0.43)  |
| <b>Eritrea</b>            | 148,269.86<br>(132,264.33,164,927.78)       | 3,297.02<br>(2,981.43,3,650.77) | 0.12<br>(0.11,0.12)     | 30.45<br>(17.26,47.99)          | 1.26<br>(0.62,1.95) | 0.82<br>(0.69,0.94)    | 15,817.88<br>(11,160.10,21,301.52)        | 1,072.96<br>(748.20,1,462.30)   | 0.25<br>(0.24,0.27)  |
| <b>Estonia</b>            | 80,370.68<br>(73,250.34,88,951.77)          | 4,449.43<br>(4,015.66,4,930.38) | 0.01<br>(0.01,0.02)     | 26.54<br>(17.90,38.92)          | 1.11<br>(0.77,1.69) | -1.35<br>(-1.73,-0.97) | 26,463.09<br>(18,883.89,35,414.22)        | 1,510.33<br>(1,079.68,2,011.03) | 0.19<br>(0.15,0.22)  |
| <b>Eswatini</b>           | 27,906.20<br>(25,116.62,30,954.48)          | 3,345.60<br>(3,043.14,3,684.90) | -0.01<br>(-0.04,0.01)   | 12.40<br>(7.80,18.39)           | 2.11<br>(1.31,3.03) | 0.69<br>(0.41,0.97)    | 5,777.04<br>(4,181.09,7,626.57)           | 1,362.81<br>(996.69,1,810.88)   | 0.11<br>(0.1,0.12)   |
| <b>Ethiopia</b>           | 2,369,527.95<br>(2,122,044.31,2,633,487.31) | 3,545.50<br>(3,211.99,3,911.83) | -0.04<br>(-0.06,-0.02)  | 390.07<br>(214.45,666.86)       | 1.00<br>(0.51,1.70) | -0.97<br>(-1.13,-0.82) | 354,805.59<br>(254,504.61,472,419.23)     | 1,288.93<br>(912.14,1,734.44)   | 0.13<br>(0.11,0.15)  |
| <b>Fiji</b>               | 44,291.46<br>(40,071.14,49,120.20)          | 5,079.12<br>(4,607.50,5,599.52) | -0.01<br>(-0.01,-0.00)  | 3.76<br>(2.63,5.13)             | 0.50<br>(0.35,0.67) | 0.64<br>(0.4,0.89)     | 10,278.23<br>(7,359.44,13,579.75)         | 1,880.59<br>(1,361.18,2,478.13) | 0.07<br>(0.07,0.08)  |
| <b>Finland</b>            | 285,115.24<br>(259,989.57,311,314.30)       | 3,935.86<br>(3,583.83,4,327.59) | -0.02<br>(-0.03,0.0670) | 183.82<br>(105.55,223.13)       | 1.36<br>(0.79,1.64) | -0.97<br>(-1.26,-0.67) | 123,491.85<br>(89,223.94,164,122.59)      | 2,037.01<br>(1,467.47,2,717.28) | 0.02<br>(-0.02,0.06) |
| <b>France</b>             | 3,333,553.31<br>(3,047,562.09,3,656,502.95) | 3,990.69<br>(3,640.70,4,388.08) | 0.05<br>(0.03,0.07)     | 3,216.52<br>(1,611.06,4,041.95) | 1.88<br>(1.04,2.30) | 0.35<br>(-0.02,0.71)   | 1,348,176.92<br>(970,647.57,1,789,574.20) | 2,054.64<br>(1,474.16,2,732.06) | 0.13<br>(0.1,0.16)   |
| <b>Gabon</b>              | 52,210.27<br>(47,015.31,58,203.25)          | 3,659.37<br>(3,321.95,4,048.84) | 0.05<br>(0.04,0.06)     | 19.37<br>(12.93,25.29)          | 1.88<br>(1.27,2.45) | 0.27<br>(0.1,0.43)     | 9,305.42<br>(6,734.95,12,292.84)          | 1,471.83<br>(1,071.01,1,948.25) | 0.25<br>(0.25,0.26)  |
| <b>Gambia</b>             | 54,086.18                                   | 3,578.03                        | 0.02                    | 9.95                            | 0.89                | 1.74                   | 7,026.55                                  | 1,319.81                        | 0.19                 |



|                      |                                                |                                 |                        |                                    |                     |                        |                                               |                                 |                        |
|----------------------|------------------------------------------------|---------------------------------|------------------------|------------------------------------|---------------------|------------------------|-----------------------------------------------|---------------------------------|------------------------|
|                      | (48,246.85,60,275.61)                          | (3,236.07,3,952.81)             | (0.01,0.03)            | (6.35,12.95)                       | (0.57,1.15)         | (1.32,2.15)            | (4,981.18,9,413.47)                           | (937.48,1,754.52)               | (0.17,0.2)             |
| <b>Georgia</b>       | 179,515.01<br>(163,151.99,198,562.46)          | 3,823.96<br>(3,468.99,4,239.85) | 0.04<br>(0.02,0.05)    | 22.95<br>(8.37,32.22)              | 0.41<br>(0.15,0.58) | 3.66<br>(3.18,4.14)    | 75,136.18<br>(53,060.26,101,331.31)           | 1,291.45<br>(911.23,1,726.65)   | 0.09<br>(0.07,0.11)    |
| <b>Germany</b>       | 4,692,706.97<br>(4,281,853.54,5,151,742.27)    | 4,188.79<br>(3,814.99,4,589.65) | 0.00<br>(-0.00,0.01)   | 1,990.61<br>(1,285.57,2,505.47)    | 0.95<br>(0.63,1.21) | -1.08<br>(-1.28,-0.88) | 2,240,546.46<br>(1,614,217.53,2,959,902.61)   | 2,211.18<br>(1,582.65,2,927.19) | 0<br>(-0.01,0.01)      |
| <b>Ghana</b>         | 786,967.12<br>(712,870.68,865,849.06)          | 3,290.38<br>(3,003.52,3,598.97) | 0.00<br>(-0.02,0.01)   | 131.92<br>(88.92,174.47)           | 0.70<br>(0.51,0.90) | 0.98<br>(0.87,1.09)    | 111,716.69<br>(80,466.31,148,567.02)          | 1,269.36<br>(906.36,1,703.56)   | 0.18<br>(0.16,0.19)    |
| <b>Greece</b>        | 543,606.86<br>(494,311.23,596,456.57)          | 3,925.43<br>(3,542.24,4,325.92) | 0.04<br>(0.01,0.07)    | 136.53<br>(92.34,191.80)           | 0.54<br>(0.35,0.70) | 0.9<br>(0.53,1.27)     | 247,009.21<br>(175,905.41,325,071.71)         | 2,031.07<br>(1,463.05,2,693.61) | 0.13<br>(0.09,0.17)    |
| <b>Greenland</b>     | 2,732.23<br>(2,464.56,3,020.48)                | 4,187.69<br>(3,794.02,4,615.22) | -0.01<br>(-0.02,0.00)  | 1.33<br>(1.04,1.62)                | 2.18<br>(1.70,2.63) | -0.04<br>(-0.65,0.57)  | 1,301.02<br>(942.29,1,715.05)                 | 2,625.47<br>(1,895.34,3,436.07) | 0.18<br>(0.15,0.22)    |
| <b>Grenada</b>       | 4,043.99<br>(3,661.75,4,476.51)                | 3,562.46<br>(3,214.72,3,935.46) | -0.04<br>(-0.04,-0.03) | 2.43<br>(1.64,3.89)                | 2.56<br>(1.69,3.99) | -0.01<br>(-0.25,0.24)  | 1,031.14<br>(750.60,1,355.45)                 | 1,543.62<br>(1,119.65,2,031.95) | 0.16<br>(0.14,0.18)    |
| <b>Guam</b>          | 9,161.80<br>(8,328.97,10,081.09)               | 5,064.47<br>(4,589.84,5,568.66) | 0.04<br>(0.03,0.05)    | 1.75<br>(1.37,2.49)                | 0.99<br>(0.77,1.39) | 0.2<br>(-0.45,0.85)    | 2,093.98<br>(1,512.98,2,778.68)               | 1,931.63<br>(1,392.19,2,558.30) | 0.13<br>(0.11,0.15)    |
| <b>Guatemala</b>     | 575,496.55<br>(513,928.35,641,428.85)          | 3,826.85<br>(3,442.43,4,230.27) | 0.04<br>(0.03,0.04)    | 214.67<br>(112.59,290.61)          | 1.97<br>(0.91,2.69) | 2.17<br>(1.28,3.06)    | 84,260.37<br>(59,817.18,112,054.96)           | 1,807.28<br>(1,304.44,2,396.64) | 0.36<br>(0.35,0.38)    |
| <b>Guinea</b>        | 302,075.76<br>(270,526.84,335,404.76)          | 3,652.83<br>(3,293.78,4,056.37) | 0.04<br>(0.04,0.05)    | 54.80<br>(32.91,75.33)             | 0.84<br>(0.52,1.15) | 1.02<br>(0.94,1.11)    | 51,907.54<br>(36,938.65,69,151.31)            | 1,330.76<br>(954.67,1,775.55)   | 0.18<br>(0.17,0.19)    |
| <b>Guinea-Bissau</b> | 44,839.21<br>(40,006.96,50,136.71)             | 3,586.71<br>(3,245.68,3,975.88) | 0.01<br>(0.01,0.01)    | 9.13<br>(5.79,12.47)               | 1.03<br>(0.67,1.38) | 0.73<br>(0.65,0.81)    | 7,453.09<br>(5,351.10,9,882.04)               | 1,322.98<br>(943.06,1,766.81)   | 0.2<br>(0.19,0.21)     |
| <b>Guyana</b>        | 26,553.32<br>(23,965.70,29,391.93)             | 3,582.09<br>(3,241.33,3,954.62) | 0.00.01<br>(0.00,0.01) | 8.85<br>(5.86,13.80)               | 1.42<br>(0.96,2.14) | 0.84<br>(0.58,1.09)    | 7,833.62<br>(5,663.36,10,326.39)              | 1,487.59<br>(1,086.03,1,957.78) | 0.21<br>(0.2,0.22)     |
| <b>Haiti</b>         | 364,411.99<br>(325,786.92,407,882.77)          | 3,566.65<br>(3,224.61,3,955.44) | 0.02<br>(0.01,0.03)    | 173.61<br>(108.93,249.01)          | 2.15<br>(1.42,2.91) | -0.04<br>(-0.15,0.07)  | 61,118.16<br>(44,235.67,80,987.82)            | 1,375.41<br>(982.88,1,821.89)   | 0.01<br>(-0.01,0.03)   |
| <b>Honduras</b>      | 313,852.48<br>(280,436.25,349,362.23)          | 3,787.50<br>(3,417.59,4,190.25) | 0.04<br>(0.04,0.05)    | 200.18<br>(125.10,275.98)          | 3.25<br>(2.02,4.28) | 1.19<br>(0.83,1.55)    | 52,624.12<br>(38,408.36,68,305.18)            | 1,900.35<br>(1,370.29,2,472.58) | 0.24<br>(0.22,0.26)    |
| <b>Hungary</b>       | 647,910.33<br>(589,068.53,720,987.19)          | 4,922.18<br>(4,439.29,5,467.67) | 0.08<br>(0.07,0.09)    | 239.69<br>(160.31,342.56)          | 1.31<br>(0.90,1.91) | -0.71<br>(-0.98,-0.44) | 189,172.90<br>(134,952.56,252,051.92)         | 1,605.07<br>(1,149.10,2,135.21) | 0.24<br>(0.22,0.26)    |
| <b>Iceland</b>       | 17,421.35<br>(15,913.03,19,091.03)             | 4,246.79<br>(3,849.30,4,677.31) | -0.08<br>(-0.11,-0.04) | 6.10<br>(3.87,8.40)                | 0.97<br>(0.63,1.36) | -1.31<br>(-1.58,-1.04) | 6,140.58<br>(4,363.48,8,190.46)               | 2,252.60<br>(1,593.27,3,016.90) | -0.09<br>(-0.12,-0.06) |
| <b>India</b>         | 41,604,039.23<br>(37,626,743.74,45,987,718.52) | 3,186.40<br>(2,889.67,3,507.62) | -0.66<br>(-0.74,-0.59) | 26,225.86<br>(19,874.69,31,725.98) | 2.83<br>(2.15,3.41) | 0.32<br>(-0.45,1.1)    | 10,877,948.62<br>(7,841,579.32,14,204,991.10) | 1,715.13<br>(1,248.36,2,223.68) | -0.03<br>(-0.05,-0.01) |
| <b>Indonesia</b>     | 13,122,441.18<br>(11,767,101.93,14,583,702.27) | 5,011.96<br>(4,543.54,5,529.04) | -0.15<br>(-0.16,-0.13) | 1,859.83<br>(1,194.45,2,533.28)    | 0.85<br>(0.57,1.12) | 1.75<br>(1.67,1.83)    | 2,679,447.76<br>(1,931,243.82,3,574,158.65)   | 1,986.45<br>(1,429.21,2,632.45) | 0.12<br>(0.11,0.13)    |

|                                         |                                             |                                 |                        |                                 |                     |                        |                                             |                                 |                        |
|-----------------------------------------|---------------------------------------------|---------------------------------|------------------------|---------------------------------|---------------------|------------------------|---------------------------------------------|---------------------------------|------------------------|
| <b>Iran<br/>(Islamic Republic of)</b>   | 4,385,723.07<br>(3,943,339.59,4,870,046.87) | 4,972.87<br>(4,496.52,5,487.11) | -0.19<br>(-0.2,-0.17)  | 632.46<br>(428.12,715.12)       | 0.88<br>(0.58,0.99) | 1.38<br>(1.2,1.56)     | 726,734.77<br>(517,709.66,971,162.71)       | 2,007.12<br>(1,439.94,2,654.64) | 0.13<br>(0.12,0.15)    |
| <b>Iraq</b>                             | 1,448,984.52<br>(1,300,863.20,1,621,204.01) | 4,184.97<br>(3,789.59,4,624.40) | -0.05<br>(-0.05,-0.05) | 184.05<br>(126.86,258.28)       | 0.60<br>(0.44,0.80) | 1.05<br>(0.94,1.15)    | 156,135.25<br>(110,638.41,209,454.82)       | 1,539.78<br>(1,065.58,2,064.93) | 0.25<br>(0.24,0.27)    |
| <b>Ireland</b>                          | 243,972.98<br>(222,137.61,267,640.19)       | 4,199.38<br>(3,814.55,4,623.53) | 0.03<br>(0.02,0.04)    | 163.42<br>(101.82,198.74)       | 2.14<br>(1.35,2.59) | -0.53<br>(-0.85,-0.21) | 83,130.12<br>(60,349.58,109,587.85)         | 2,272.76<br>(1,644.25,3,027.55) | 0.07<br>(0.04,0.09)    |
| <b>Israel</b>                           | 400,027.89<br>(364,039.38,436,247.76)       | 4,131.57<br>(3,750.96,4,538.07) | 0.02<br>(0.00,0.03)    | 139.93<br>(93.01,185.13)        | 1.16<br>(0.77,1.52) | 0.51<br>(0.27,0.75)    | 101,721.06<br>(73,241.21,135,855.65)        | 2,164.19<br>(1,543.44,2,885.18) | 0.02<br>(-0.01,0.06)   |
| <b>Italy</b>                            | 3,737,842.33<br>(3,404,338.38,4,128,349.23) | 4,528.03<br>(4,107.37,4,986.47) | -0.02<br>(-0.04,-0.00) | 1,884.30<br>(1,288.68,2,788.70) | 1.18<br>(0.81,1.68) | -0.13<br>(-0.25,-0.01) | 1,562,441.21<br>(1,117,023.85,2,068,127.77) | 2,183.58<br>(1,562.32,2,888.93) | 0.02<br>(0,0.03)       |
| <b>Jamaica</b>                          | 108,984.95<br>(98,503.26,120,695.07)        | 3,637.25<br>(3,289.51,4,028.68) | 0.01<br>(0.01,0.02)    | 76.21<br>(51.68,117.96)         | 2.38<br>(1.56,3.58) | 0.36<br>(-0.18,0.89)   | 29,473.71<br>(21,529.02,38,622.68)          | 1,617.44<br>(1,190.22,2,120.49) | 0.18<br>(0.13,0.23)    |
| <b>Japan</b>                            | 8,039,387.24<br>(7,334,292.99,8,822,836.83) | 4,397.99<br>(3,998.82,4,839.69) | -0.11<br>(-0.13,-0.1)  | 3,836.99<br>(2,165.31,4,564.60) | 1.05<br>(0.71,1.36) | -1.61<br>(-1.77,-1.44) | 3,725,704.97<br>(2,671,747.27,4,913,041.41) | 2,349.89<br>(1,681.37,3,119.24) | -0.07<br>(-0.12,-0.02) |
| <b>Jordan</b>                           | 421,432.99<br>(375,904.71,471,813.84)       | 4,233.60<br>(3,821.45,4,673.86) | 0.01<br>(0.01,0.01)    | 66.89<br>(50.50,85.53)          | 0.79<br>(0.62,1.03) | -0.72<br>(-0.92,-0.53) | 37,253.84<br>(26,857.81,49,290.58)          | 1,805.55<br>(1,302.52,2,378.70) | 0.28<br>(0.27,0.28)    |
| <b>Kazakhstan</b>                       | 767,273.81<br>(695,374.70,850,838.71)       | 4,098.10<br>(3,727.11,4,527.88) | -0.02<br>(-0.03,-0.01) | 77.65<br>(22.36,105.48)         | 0.52<br>(0.13,0.72) | 5.25<br>(4.72,5.77)    | 194,856.23<br>(139,158.49,259,752.72)       | 1,412.54<br>(1,006.14,1,882.43) | 0.12<br>(0.11,0.13)    |
| <b>Kenya</b>                            | 1,286,335.29<br>(1,155,071.03,1,431,990.71) | 3,709.14<br>(3,366.58,4,095.20) | -0.00<br>(-0.01,0.00)  | 233.23<br>(152.73,307.06)       | 1.23<br>(0.68,1.62) | 1.24<br>(1.11,1.38)    | 165,229.03<br>(118,080.74,219,265.71)       | 1,405.95<br>(1,004.74,1,869.93) | 0.15<br>(0.14,0.16)    |
| <b>Kiribati</b>                         | 5,005.37<br>(4,492.07,5,558.97)             | 5,210.53<br>(4,731.13,5,726.11) | 0.12<br>(0.1,0.13)     | 0.56<br>(0.28,0.78)             | 0.66<br>(0.32,0.90) | 0.35<br>(0.23,0.47)    | 949.73<br>(681.21,1,255.17)                 | 1,905.85<br>(1,383.20,2,495.17) | 0.16<br>(0.15,0.17)    |
| <b>Kuwait</b>                           | 198,294.67<br>(175,620.48,224,430.62)       | 4,199.76<br>(3,807.33,4,636.39) | 0.04<br>(0.04,0.05)    | 13.61<br>(6.44,18.87)           | 0.39<br>(0.19,0.53) | 1.68<br>(0.29,3.09)    | 22,578.12<br>(16,035.27,29,681.36)          | 1,776.94<br>(1,287.43,2,335.99) | 0.23<br>(0.17,0.29)    |
| <b>Kyrgyzstan</b>                       | 227,277.40<br>(204,503.64,252,010.12)       | 3,950.57<br>(3,571.38,4,365.22) | -0.04<br>(-0.04,-0.03) | 75.12<br>(48.99,100.55)         | 1.77<br>(1.06,2.23) | 0.98<br>(0.3,1.66)     | 46,754.06<br>(33,810.62,61,880.40)          | 1,385.92<br>(998.98,1,850.38)   | 0.09<br>(0.07,0.11)    |
| <b>Lao People's Democratic Republic</b> | 285,459.62<br>(256,679.29,318,324.37)       | 4,694.17<br>(4,248.57,5,181.59) | -0.01<br>(-0.02,-0.01) | 38.89<br>(25.77,50.17)          | 0.74<br>(0.52,0.92) | 0.56<br>(0.47,0.66)    | 49,147.06<br>(35,463.01,65,263.56)          | 1,862.42<br>(1,345.26,2,468.48) | 0.2<br>(0.19,0.21)     |
| <b>Latvia</b>                           | 122,228.33<br>(111,073.31,135,783.48)       | 4,540.29<br>(4,106.52,5,017.42) | 0.02<br>(0.02,0.02)    | 33.05<br>(20.89,47.72)          | 0.95<br>(0.62,1.37) | -1.14<br>(-1.74,-0.55) | 46,146.14<br>(32,727.98,61,581.84)          | 1,531.08<br>(1,097.15,2,054.31) | 0.21<br>(0.19,0.22)    |
| <b>Lebanon</b>                          | 211,465.93<br>(191,189.85,234,325.72)       | 3,969.81<br>(3,585.63,4,394.95) | 0.02<br>(0.02,0.02)    | 45.75<br>(27.83,72.13)          | 0.89<br>(0.54,1.40) | 1.59<br>(1.49,1.69)    | 37,295.80<br>(25,680.20,50,508.61)          | 1,625.61<br>(1,140.40,2,183.29) | 0.44<br>(0.43,0.46)    |
| <b>Lesotho</b>                          | 56,381.68<br>(50,821.35,62,404.51)          | 3,342.09<br>(3,037.18,3,697.07) | -0.05<br>(-0.05,-)     | 28.53<br>(17.38,40.08)          | 2.31<br>(1.38,3.23) | 1.71<br>(1.57,1.84)    | 15,718.91<br>(11,364.63,20,875.04)          | 1,330.84<br>(966.34,1,748.68)   | 0.09<br>(0.08,0.11)    |

|                                             |                                             |                                 |                        |                                 |                     |                        |                                           |                                 |                        |
|---------------------------------------------|---------------------------------------------|---------------------------------|------------------------|---------------------------------|---------------------|------------------------|-------------------------------------------|---------------------------------|------------------------|
|                                             |                                             |                                 | 0.04)                  |                                 |                     |                        |                                           |                                 |                        |
| <b>Liberia</b>                              | 124,075.82<br>(111,085.62,138,696.55)       | 3,617.85<br>(3,276.47,3,993.91) | 0.02<br>(0.02,0.03)    | 20.79<br>(11.97,30.42)          | 0.82<br>(0.49,1.13) | 0.71<br>(0.55,0.87)    | 16,855.81<br>(12,164.60,22,374.19)        | 1,267.06<br>(884.09,1,712.75)   | 0.03<br>(0.01,0.05)    |
| <b>Libya</b>                                | 291,009.61<br>(260,279.75,327,251.93)       | 4,179.17<br>(3,787.53,4,627.79) | -0.02<br>(-0.02,-0.01) | 52.89<br>(33.29,76.24)          | 0.90<br>(0.58,1.22) | 2.41<br>(1.97,2.85)    | 42,778.04<br>(30,572.63,56,624.64)        | 1,719.03<br>(1,227.60,2,274.89) | 0.23<br>(0.21,0.24)    |
| <b>Lithuania</b>                            | 176,465.08<br>(160,385.32,196,392.33)       | 4,503.49<br>(4,069.17,4,980.96) | -0.05<br>(-0.05,-0.05) | 51.38<br>(32.55,72.96)          | 1.00<br>(0.66,1.45) | -0.76<br>(-1.37,-0.14) | 60,956.25<br>(43,533.23,81,085.46)        | 1,495.74<br>(1,064.99,1,987.97) | 0.08<br>(0.05,0.11)    |
| <b>Luxembourg</b>                           | 31,420.57<br>(28,506.83,34,524.84)          | 4,089.55<br>(3,702.15,4,492.86) | 0.00<br>(-0.01,0.02)   | 9.88<br>(6.63,14.66)            | 0.90<br>(0.63,1.36) | -1.34<br>(-1.6,-1.07)  | 9,937.70<br>(7,130.09,13,249.59)          | 2,141.01<br>(1,537.75,2,848.10) | 0.04<br>(0.03,0.05)    |
| <b>Madagascar</b>                           | 631,254.49<br>(564,789.18,708,661.40)       | 3,535.16<br>(3,199.20,3,935.15) | -0.12<br>(-0.13,-0.11) | 98.27<br>(61.90,136.04)         | 0.96<br>(0.52,1.38) | 0.07<br>(-0.07,0.21)   | 90,380.62<br>(64,190.34,119,581.65)       | 1,298.37<br>(927.47,1,734.84)   | 0.07<br>(0.07,0.08)    |
| <b>Malawi</b>                               | 407,938.11<br>(364,297.52,454,666.91)       | 3,505.11<br>(3,166.71,3,889.82) | -0.07<br>(-0.07,-0.06) | 82.73<br>(47.75,124.49)         | 1.17<br>(0.61,1.78) | 0.18<br>(0.02,0.34)    | 70,291.29<br>(50,790.24,92,738.76)        | 1,311.91<br>(934.71,1,751.53)   | 0.12<br>(0.11,0.13)    |
| <b>Malaysia</b>                             | 1,399,728.82<br>(1,258,703.22,1,553,379.96) | 4,520.50<br>(4,076.17,4,994.57) | 0.03<br>(0.01,0.05)    | 313.66<br>(231.65,423.99)       | 1.06<br>(0.79,1.48) | 0.45<br>(0.35,0.54)    | 228,941.61<br>(164,419.92,301,489.34)     | 1,847.78<br>(1,342.85,2,426.18) | 0.25<br>(0.24,0.26)    |
| <b>Maldives</b>                             | 21,337.28<br>(18,866.46,23,993.94)          | 4,418.65<br>(3,985.05,4,868.88) | -0.03<br>(-0.04,-0.02) | 2.02<br>(1.48,2.53)             | 0.59<br>(0.42,0.73) | -1.24<br>(-1.41,-1.07) | 2,284.13<br>(1,641.93,3,049.61)           | 1,801.72<br>(1,293.62,2,397.11) | 0.22<br>(0.21,0.23)    |
| <b>Mali</b>                                 | 459,158.38<br>(412,773.73,511,854.63)       | 3,399.34<br>(3,083.75,3,751.93) | 0.14<br>(0.13,0.15)    | 75.60<br>(48.07,104.09)         | 0.75<br>(0.50,1.01) | 0.46<br>(0.27,0.66)    | 61,476.10<br>(44,339.66,82,313.48)        | 1,220.48<br>(862.58,1,638.25)   | 0.26<br>(0.24,0.28)    |
| <b>Malta</b>                                | 24,326.82<br>(22,212.81,26,746.07)          | 4,231.22<br>(3,852.20,4,665.17) | 0.04<br>(0.02,0.06)    | 9.45<br>(6.28,13.11)            | 0.97<br>(0.66,1.38) | -1.1<br>(-1.28,-0.91)  | 8,947.10<br>(6,431.39,11,879.56)          | 2,224.20<br>(1,599.68,2,952.75) | 0.07<br>(0.05,0.09)    |
| <b>Marshall Islands</b>                     | 2,416.48<br>(2,172.21,2,690.62)             | 4,966.96<br>(4,501.87,5,468.73) | -0.02<br>(-0.03,-0.02) | 0.54<br>(0.31,0.83)             | 1.37<br>(0.79,2.06) | 1.11<br>(1.03,1.2)     | 469.53<br>(337.00,626.06)                 | 1,815.10<br>(1,315.87,2,380.93) | 0.08<br>(0.07,0.09)    |
| <b>Mauritania</b>                           | 106,338.43<br>(95,822.15,118,195.64)        | 3,648.50<br>(3,302.45,4,032.83) | 0.04<br>(0.04,0.05)    | 19.34<br>(12.19,26.45)          | 0.85<br>(0.55,1.15) | 0.12<br>(0.02,0.21)    | 17,260.42<br>(12,409.33,22,873.50)        | 1,400.13<br>(997.35,1,875.72)   | 0.23<br>(0.22,0.25)    |
| <b>Mauritius</b>                            | 70,804.45<br>(64,072.82,78,364.11)          | 4,477.54<br>(4,039.32,4,934.37) | 0.04<br>(0.03,0.04)    | 17.73<br>(7.60,25.24)           | 1.19<br>(0.50,1.70) | 3.31<br>(2.81,3.8)     | 16,699.77<br>(11,916.08,22,207.63)        | 1,867.30<br>(1,361.80,2,435.77) | 0.21<br>(0.18,0.24)    |
| <b>Mexico</b>                               | 4,802,408.03<br>(4,343,671.59,5,353,502.65) | 3,759.49<br>(3,408.83,4,170.75) | 0.05<br>(0.03,0.07)    | 3,311.77<br>(2,201.23,4,789.94) | 2.85<br>(1.88,4.08) | -0.3<br>(-0.69,0.08)   | 1,150,760.27<br>(831,326.91,1,494,802.48) | 2,005.40<br>(1,458.96,2,630.04) | 0.14<br>(0.09,0.18)    |
| <b>Micronesia<br/>(Federated States of)</b> | 4,583.94<br>(4,139.10,5,069.64)             | 5,069.65<br>(4,586.06,5,584.60) | 0.02<br>(0.01,0.02)    | 1.02<br>(0.57,1.47)             | 1.33<br>(0.79,1.83) | 1<br>(0.95,1.04)       | 1,205.10<br>(872.78,1,609.25)             | 1,881.62<br>(1,355.87,2,476.14) | 0.13<br>(0.12,0.14)    |
| <b>Monaco</b>                               | 2,120.10<br>(1,928.49,2,334.29)             | 4,054.12<br>(3,667.78,4,468.54) | -0.00<br>(-0.02,0.02)  | 0.46<br>(0.33,0.59)             | 0.45<br>(0.32,0.57) | 0.4<br>(0.32,0.47)     | 962.30<br>(685.86,1,285.07)               | 2,108.61<br>(1,506.33,2,798.39) | -0.04<br>(-0.04,-0.03) |
| <b>Mongolia</b>                             | 123,849.86                                  | 3,938.95                        | -0.08                  | 22.76                           | 0.94                | 0.33                   | 18,805.52                                 | 1,333.46                        | 0.03                   |

|                                 |                                             |                                 |                        |                             |                     |                        |                                         |                                 |                        |
|---------------------------------|---------------------------------------------|---------------------------------|------------------------|-----------------------------|---------------------|------------------------|-----------------------------------------|---------------------------------|------------------------|
|                                 | (110,823.25,138,413.17)                     | (3,556.95,4,357.41)             | (-0.09,-0.06)          | (16.23,31.03)               | (0.68,1.22)         | (0.2,0.47)             | (13,435.31,25,174.13)                   | (951.98,1,768.97)               | (0,0.06)               |
| <b>Montenegro</b>               | 37,499.02<br>(33,844.77,41,758.14)          | 4,824.43<br>(4,331.61,5,382.34) | -0.03<br>(-0.04,-0.02) | 3.94<br>(3.15,4.86)         | 0.45<br>(0.36,0.55) | 0.93<br>(0.59,1.26)    | 9,696.34<br>(6,898.33,13,033.90)        | 1,533.95<br>(1,094.90,2,035.73) | 0.06<br>(0.05,0.07)    |
| <b>Morocco</b>                  | 1,573,383.65<br>(1,417,466.20,1,745,808.28) | 4,348.26<br>(3,935.23,4,808.89) | 0.07<br>(0.06,0.07)    | 248.36<br>(152.56,350.24)   | 0.85<br>(0.50,1.22) | 2.04<br>(1.81,2.28)    | 292,889.83<br>(210,553.60,387,623.47)   | 1,762.26<br>(1,274.53,2,333.41) | 0.34<br>(0.33,0.34)    |
| <b>Mozambique</b>               | 641,446.41<br>(574,103.86,715,532.47)       | 3,622.50<br>(3,273.97,4,013.97) | 0.04<br>(0.04,0.05)    | 140.09<br>(84.79,217.38)    | 1.35<br>(0.74,2.12) | 0.8<br>(0.7,0.9)       | 93,635.55<br>(66,873.34,125,181.80)     | 1,256.01<br>(884.46,1,675.85)   | 0.26<br>(0.24,0.28)    |
| <b>Myanmar</b>                  | 2,354,710.40<br>(2,121,629.65,2,611,839.10) | 4,424.52<br>(4,010.10,4,892.62) | 0.08<br>(0.07,0.09)    | 380.14<br>(266.62,492.71)   | 0.79<br>(0.57,1.01) | 0.67<br>(0.58,0.76)    | 494,500.78<br>(352,338.81,660,041.03)   | 1,767.92<br>(1,268.63,2,342.35) | 0.28<br>(0.27,0.3)     |
| <b>Namibia</b>                  | 65,452.71<br>(59,093.99,72,664.57)          | 3,496.50<br>(3,172.91,3,869.44) | 0.02<br>(0.02,0.03)    | 25.48<br>(16.19,34.82)      | 1.84<br>(1.15,2.44) | 0.5<br>(0.29,0.7)      | 11,712.86<br>(8,342.49,15,631.10)       | 1,400.00<br>(1,009.61,1,866.48) | 0.27<br>(0.25,0.28)    |
| <b>Nauru</b>                    | 399.10<br>(357.36,446.14)                   | 5,137.15<br>(4,678.81,5,673.85) | 0.05<br>(0.04,0.05)    | 0.09<br>(0.05,0.14)         | 1.47<br>(0.87,2.10) | 0.98<br>(0.9,1.07)     | 122.01<br>(87.18,162.12)                | 1,920.58<br>(1,388.76,2,526.63) | 0.15<br>(0.14,0.16)    |
| <b>Nepal</b>                    | 1,060,410.34<br>(950,775.07,1,176,889.47)   | 3,964.14<br>(3,570.78,4,371.89) | 0.00<br>(-0.01,0.01)   | 434.26<br>(295.43,622.87)   | 2.46<br>(1.70,3.53) | 1.3<br>(1.2,1.41)      | 224,156.75<br>(161,987.08,293,897.08)   | 1,913.90<br>(1,381.40,2,491.20) | 0.39<br>(0.38,0.4)     |
| <b>Netherlands</b>              | 852,981.71<br>(775,298.82,938,756.24)       | 3,834.32<br>(3,479.67,4,213.39) | 0.00<br>(-0.01,0.01)   | 688.67<br>(517.22,1,062.37) | 1.93<br>(1.48,3.01) | -1.15<br>(-1.43,-0.88) | 357,888.41<br>(256,723.89,471,516.77)   | 2,000.59<br>(1,435.40,2,655.45) | -0.05<br>(-0.07,-0.03) |
| <b>New Zealand</b>              | 229,247.65<br>(207,708.89,252,791.08)       | 4,092.81<br>(3,690.06,4,523.51) | -0.09<br>(-0.11,-0.07) | 190.58<br>(136.58,274.24)   | 2.35<br>(1.70,3.36) | -0.23<br>(-0.4,-0.06)  | 67,192.80<br>(48,047.62,89,841.98)      | 1,761.85<br>(1,249.41,2,359.94) | -0.1<br>(-0.13,-0.07)  |
| <b>Nicaragua</b>                | 219,917.78<br>(196,480.03,245,752.92)       | 3,754.20<br>(3,387.17,4,167.64) | -0.04<br>(-0.05,-0.04) | 101.28<br>(77.71,132.58)    | 2.20<br>(1.77,2.96) | 0.82<br>(0.53,1.11)    | 38,476.82<br>(27,238.64,51,185.82)      | 1,795.86<br>(1,285.70,2,389.26) | 0.3<br>(0.27,0.33)     |
| <b>Niger</b>                    | 477,554.05<br>(425,573.16,535,040.03)       | 3,609.95<br>(3,279.20,3,996.37) | 0.03<br>(0.03,0.03)    | 59.24<br>(36.96,82.83)      | 0.67<br>(0.42,0.92) | 0.58<br>(0.46,0.7)     | 54,664.58<br>(39,335.91,72,744.86)      | 1,290.78<br>(920.74,1,732.85)   | 0.17<br>(0.16,0.17)    |
| <b>Nigeria</b>                  | 5,969,665.82<br>(5,338,264.41,6,640,243.25) | 4,148.28<br>(3,767.87,4,561.38) | 0.05<br>(0.04,0.05)    | 838.27<br>(516.78,1,276.25) | 0.84<br>(0.55,1.17) | 1.47<br>(1.37,1.56)    | 866,542.72<br>(624,970.72,1,148,571.88) | 1,561.31<br>(1,115.78,2,072.69) | 0.23<br>(0.22,0.24)    |
| <b>Niue</b>                     | 98.22<br>(89.20,108.27)                     | 5,130.60<br>(4,661.55,5,645.29) | 0.01<br>(0.01,0.02)    | 0.02<br>(0.01,0.03)         | 1.09<br>(0.64,1.56) | 0.65<br>(0.55,0.75)    | 38.98<br>(28.33,51.40)                  | 1,922.40<br>(1,401.70,2,530.04) | 0.1<br>(0.09,0.11)     |
| <b>North Macedonia</b>          | 124,425.58<br>(112,477.62,138,919.68)       | 4,575.60<br>(4,118.86,5,092.43) | -0.02<br>(-0.03,-0.01) | 12.53<br>(9.51,17.54)       | 0.47<br>(0.36,0.62) | -0.14<br>(-0.45,0.17)  | 28,318.99<br>(19,974.01,37,837.08)      | 1,434.47<br>(1,027.32,1,916.84) | 0.08<br>(0.07,0.09)    |
| <b>Northern Mariana Islands</b> | 2,622.60<br>(2,353.89,2,922.82)             | 5,036.53<br>(4,585.95,5,543.63) | 0.01<br>(0.00,0.03)    | 0.35<br>(0.27,0.46)         | 0.82<br>(0.65,1.06) | 0.16<br>(0.06,0.27)    | 678.50<br>(477.71,910.39)               | 1,877.73<br>(1,354.86,2,473.88) | 0.11<br>(0.08,0.13)    |
| <b>Norway</b>                   | 281,167.97<br>(256,929.20,309,861.62)       | 4,196.64<br>(3,812.33,4,615.58) | -0.11<br>(-0.13,-0.09) | 190.06<br>(133.89,277.32)   | 1.79<br>(1.30,2.64) | -1.24<br>(-1.37,-1.11) | 104,440.20<br>(74,825.35,139,744.92)    | 1,878.97<br>(1,333.23,2,518.90) | -0.21<br>(-0.24,-0.17) |
| <b>Oman</b>                     | 177,666.15                                  | 4,194.46                        | 0.04                   | 11.61                       | 0.75                | -0.27                  | 19,334.04                               | 1,726.34                        | 0.42                   |

|                            |                                              |                                 |                        |                                 |                     |                        |                                             |                                 |                        |
|----------------------------|----------------------------------------------|---------------------------------|------------------------|---------------------------------|---------------------|------------------------|---------------------------------------------|---------------------------------|------------------------|
|                            | (154,726.06,204,786.04)                      | (3,784.72,4,642.70)             | (0.03,0.04)            | (9.63,15.37)                    | (0.52,0.90)         | (-1.04,0.51)           | (13,675.39,25,735.27)                       | (1,239.57,2,271.08)             | (0.4,0.45)             |
| <b>Pakistan</b>            | 5,460,705.58<br>(4,857,093.01,6,134,027.33)  | 3,408.27<br>(3,069.81,3,810.02) | 0.11<br>(0.1,0.12)     | 2,316.48<br>(1,874.47,2,877.80) | 2.77<br>(2.26,3.45) | 1.04<br>(0.93,1.15)    | 1,037,219.47<br>(750,014.99,1,361,119.32)   | 1,596.97<br>(1,159.07,2,085.93) | 0.37<br>(0.36,0.39)    |
| <b>Palau</b>               | 1,115.51<br>(1,006.18,1,237.51)              | 5,094.77<br>(4,619.14,5,606.13) | 0.00<br>(-0.00,0.01)   | 0.08<br>(0.06,0.10)             | 0.45<br>(0.31,0.58) | 0.4<br>(0.34,0.46)     | 233.27<br>(166.79,311.11)                   | 1,853.60<br>(1,347.66,2,454.68) | 0.08<br>(0.07,0.09)    |
| <b>Palestine</b>           | 156,209.83<br>(139,555.04,174,829.61)        | 4,155.87<br>(3,760.81,4,602.55) | -0.05<br>(-0.06,-0.05) | 17.47<br>(8.57,22.87)           | 0.66<br>(0.31,0.87) | 1.48<br>(1.29,1.67)    | 17,608.07<br>(12,450.58,23,596.39)          | 1,514.28<br>(1,046.74,2,042.27) | 0.05<br>(0.04,0.06)    |
| <b>Panama</b>              | 155,105.69<br>(139,967.54,171,991.84)        | 3,690.44<br>(3,330.95,4,090.25) | 0.05<br>(0.05,0.05)    | 52.95<br>(35.81,87.33)          | 1.24<br>(0.84,2.05) | -0.1<br>(-0.37,0.17)   | 34,013.54<br>(24,459.92,44,583.81)          | 1,891.27<br>(1,370.01,2,485.32) | 0.2<br>(0.2,0.21)      |
| <b>Papua New Guinea</b>    | 377,653.14<br>(337,778.74,422,501.39)        | 5,036.60<br>(4,569.34,5,564.52) | 0.03<br>(0.02,0.04)    | 38.54<br>(22.65,54.45)          | 0.61<br>(0.37,0.88) | 0.85<br>(0.76,0.95)    | 47,894.51<br>(33,828.34,63,904.44)          | 1,766.59<br>(1,278.01,2,339.75) | 0.11<br>(0.1,0.12)     |
| <b>Paraguay</b>            | 260,256.55<br>(233,835.32,289,726.18)        | 3,959.51<br>(3,573.44,4,378.28) | 0.07<br>(0.06,0.08)    | 139.88<br>(51.38,197.62)        | 2.29<br>(0.84,3.23) | 5.76<br>(5.25,6.27)    | 51,140.61<br>(36,711.15,67,117.12)          | 1,908.78<br>(1,398.01,2,494.84) | 0.29<br>(0.27,0.3)     |
| <b>Peru</b>                | 1,178,650.07<br>(1,064,033.23,1,306,703.97)  | 3,466.64<br>(3,129.09,3,824.50) | 0.10<br>(0.09,0.10)    | 270.61<br>(164.25,364.33)       | 0.81<br>(0.49,1.09) | -0.22<br>(-1.3,0.87)   | 234,644.25<br>(168,027.73,308,631.62)       | 1,611.14<br>(1,153.18,2,136.00) | 0.27<br>(0.24,0.29)    |
| <b>Philippines</b>         | 5,323,237.77<br>(4,794,736.11,5,915,698.77)  | 5,392.67<br>(4,879.88,5,941.04) | -0.11<br>(-0.13,-0.1)  | 841.32<br>(465.56,1,492.46)     | 0.97<br>(0.54,1.71) | 1.35<br>(1.11,1.6)     | 924,435.97<br>(662,061.30,1,229,139.70)     | 2,075.88<br>(1,484.69,2,752.64) | -0.03<br>(-0.05,-0.02) |
| <b>Poland</b>              | 2,589,186.40<br>(2,348,876.96,2,878,564.92)  | 5,078.95<br>(4,580.31,5,657.96) | -0.08<br>(-0.08,-0.07) | 617.08<br>(469.68,1,020.31)     | 0.94<br>(0.71,1.54) | -2<br>(-2.17,-1.83)    | 681,971.40<br>(490,155.10,904,413.90)       | 1,629.45<br>(1,167.38,2,168.85) | -0.02<br>(-0.07,0.02)  |
| <b>Portugal</b>            | 604,127.77<br>(551,738.40,661,955.32)        | 4,202.83<br>(3,813.05,4,625.18) | 0.03<br>(0.01,0.05)    | 258.22<br>(198.69,471.18)       | 1.05<br>(0.82,1.77) | -0.6<br>(-0.99,-0.21)  | 256,681.22<br>(184,616.13,340,506.78)       | 2,255.82<br>(1,627.95,2,973.92) | 0.16<br>(0.14,0.19)    |
| <b>Puerto Rico</b>         | 172,078.63<br>(157,017.94,189,636.63)        | 3,604.17<br>(3,271.90,3,981.33) | 0.02<br>(0.01,0.02)    | 89.42<br>(57.09,128.16)         | 1.38<br>(0.84,1.91) | -0.06<br>(-0.28,0.16)  | 53,834.07<br>(38,646.14,70,870.90)          | 1,592.95<br>(1,146.11,2,098.31) | 0.23<br>(0.21,0.25)    |
| <b>Qatar</b>               | 127,537.19<br>(111,089.72,146,400.78)        | 4,312.61<br>(3,886.39,4,756.93) | 0.02<br>(0.01,0.03)    | 3.86<br>(2.85,5.15)             | 0.41<br>(0.30,0.52) | 0.01<br>(-1,1.03)      | 5,759.06<br>(4,026.07,7,623.79)             | 1,730.30<br>(1,254.74,2,282.99) | 0.29<br>(0.28,0.3)     |
| <b>Republic of Korea</b>   | 2,843,205.72<br>(2,588,805.71,3,132,472.76)  | 3,918.52<br>(3,556.57,4,294.92) | -0.06<br>(-0.07,-0.06) | 1,255.66<br>(792.82,1,518.78)   | 1.56<br>(0.97,1.90) | -1.06<br>(-1.36,-0.77) | 855,635.73<br>(603,128.35,1,143,300.47)     | 2,246.44<br>(1,585.66,3,014.79) | 0.17<br>(0.14,0.2)     |
| <b>Republic of Moldova</b> | 214,707.64<br>(194,548.84,238,596.25)        | 4,465.47<br>(4,032.53,4,961.84) | -0.04<br>(-0.05,-0.03) | 25.51<br>(15.67,32.23)          | 0.49<br>(0.29,0.61) | 1.44<br>(0.73,2.15)    | 63,328.28<br>(44,972.20,84,379.96)          | 1,462.81<br>(1,044.21,1,954.25) | 0.12<br>(0.11,0.13)    |
| <b>Romania</b>             | 1,274,115.22<br>(1,150,268.83,1,418,620.66)  | 4,943.33<br>(4,453.38,5,508.96) | -0.11<br>(-0.12,-0.11) | 117.98<br>(61.98,153.51)        | 0.32<br>(0.18,0.42) | 0.95<br>(0.63,1.26)    | 409,978.34<br>(292,176.22,549,033.55)       | 1,579.18<br>(1,122.03,2,113.49) | 0.01<br>(0,0.01)       |
| <b>Russian Federation</b>  | 9,410,821.48<br>(8,562,553.37,10,395,294.55) | 4,923.15<br>(4,480.27,5,418.59) | -0.05<br>(-0.05,-0.04) | 2,084.90<br>(1,310.79,2,708.28) | 0.97<br>(0.62,1.27) | 0.32<br>(-0.49,1.14)   | 2,837,264.51<br>(1,989,456.63,3,865,511.93) | 1,674.69<br>(1,177.72,2,284.52) | 0.04<br>(0.01,0.07)    |
| <b>Rwanda</b>              | 329,650.44                                   | 3,636.47                        | -0.06                  | 59.44                           | 1.11                | -0.46                  | 52,520.56                                   | 1,212.06                        | -0.18                  |

|                                         |                                             |                                 |                        |                           |                     |                        |                                       |                                 |                        |
|-----------------------------------------|---------------------------------------------|---------------------------------|------------------------|---------------------------|---------------------|------------------------|---------------------------------------|---------------------------------|------------------------|
|                                         | (296,054.63,366,919.76)                     | (3,301.58,4,019.44)             | (-0.07,-0.04)          | (34.02,91.34)             | (0.57,1.69)         | (-0.66,-0.26)          | (37,370.22,69,826.73)                 | (837.38,1,654.70)               | (-0.21,-0.14)          |
| <b>Saint Kitts and Nevis</b>            | 2,476.43<br>(2,234.01,2,756.33)             | 3,591.88<br>(3,246.25,3,969.71) | -0.01<br>(-0.02,-0.01) | 1.34<br>(0.77,2.11)       | 2.43<br>(1.40,3.77) | -0.78<br>(-0.99,-0.57) | 544.39<br>(397.88,709.86)             | 1,584.02<br>(1,161.91,2,076.39) | 0.12<br>(0.11,0.13)    |
| <b>Saint Lucia</b>                      | 7,491.70<br>(6,776.56,8,317.79)             | 3,633.53<br>(3,285.20,4,017.01) | -0.05<br>(-0.05,-0.05) | 4.62<br>(3.22,6.66)       | 2.34<br>(1.62,3.36) | -0.47<br>(-0.61,-0.33) | 1,573.39<br>(1,143.44,2,047.43)       | 1,581.70<br>(1,148.87,2,079.27) | 0.13<br>(0.11,0.14)    |
| <b>Saint Vincent and the Grenadines</b> | 4,544.92<br>(4,107.89,5,020.98)             | 3,556.31<br>(3,224.00,3,924.97) | -0.00<br>(-0.00,0.00)  | 2.38<br>(1.54,3.51)       | 2.04<br>(1.31,2.98) | 0.56<br>(0.3,0.81)     | 1,205.74<br>(868.06,1,583.78)         | 1,529.50<br>(1,105.89,2,010.70) | 0.16<br>(0.15,0.18)    |
| <b>Samoa</b>                            | 9,361.56<br>(8,449.58,10,301.28)            | 5,236.72<br>(4,751.97,5,751.63) | -0.08<br>(-0.09,-0.07) | 1.62<br>(0.95,2.34)       | 1.00<br>(0.59,1.39) | 0.62<br>(0.56,0.69)    | 2,225.64<br>(1,593.65,2,930.28)       | 1,927.81<br>(1,393.87,2,548.36) | -0.03<br>(-0.04,-0.03) |
| <b>San Marino</b>                       | 1,703.47<br>(1,554.47,1,875.19)             | 4,054.04<br>(3,682.31,4,470.15) | 0.01<br>(-0.00,0.02)   | 0.48<br>(0.32,0.69)       | 0.65<br>(0.42,0.95) | 0.34<br>(0.25,0.42)    | 585.95<br>(419.59,776.78)             | 2,099.89<br>(1,506.51,2,802.56) | 0.01<br>(0,0.02)       |
| <b>Sao Tome and Principe</b>            | 5,392.06<br>(4,840.72,6,003.40)             | 3,429.74<br>(3,119.57,3,778.25) | 0.07<br>(0.06,0.07)    | 1.15<br>(0.71,1.52)       | 0.95<br>(0.60,1.25) | 1.79<br>(1.6,1.98)     | 942.18<br>(673.30,1,252.25)           | 1,292.34<br>(921.17,1,728.07)   | 0.22<br>(0.2,0.23)     |
| <b>Saudi Arabia</b>                     | 1,539,218.03<br>(1,363,174.76,1,741,810.04) | 4,275.12<br>(3,871.05,4,724.08) | 0.05<br>(0.05,0.05)    | 224.66<br>(139.23,330.15) | 0.78<br>(0.58,1.04) | 1.12<br>(0.97,1.26)    | 157,284.76<br>(112,781.57,211,307.63) | 1,742.02<br>(1,253.83,2,300.40) | 0.47<br>(0.46,0.49)    |
| <b>Senegal</b>                          | 371,653.68<br>(334,012.04,413,732.55)       | 3,451.50<br>(3,138.11,3,807.95) | 0.00<br>(-0.00,0.01)   | 67.03<br>(43.13,88.74)    | 0.82<br>(0.54,1.06) | 0.75<br>(0.33,1.18)    | 55,419.04<br>(39,821.43,73,850.28)    | 1,284.76<br>(917.31,1,716.63)   | 0.16<br>(0.14,0.17)    |
| <b>Serbia</b>                           | 552,781.11<br>(499,947.48,613,941.39)       | 4,883.97<br>(4,390.83,5,438.93) | 0.00<br>(-0.01,0.02)   | 153.33<br>(116.23,202.84) | 1.10<br>(0.83,1.43) | 0.95<br>(0.52,1.39)    | 163,553.41<br>(116,666.22,219,409.85) | 1,570.03<br>(1,118.63,2,100.69) | 0.12<br>(0.11,0.13)    |
| <b>Seychelles</b>                       | 5,205.67<br>(4,695.30,5,764.34)             | 4,518.05<br>(4,089.91,4,986.76) | -0.06<br>(-0.06,-0.06) | 0.41<br>(0.28,0.49)       | 0.40<br>(0.26,0.48) | 1.34<br>(1.14,1.53)    | 1,122.87<br>(807.54,1,498.19)         | 1,850.81<br>(1,334.88,2,441.40) | 0.06<br>(0.04,0.08)    |
| <b>Sierra Leone</b>                     | 205,398.05<br>(183,911.92,229,500.77)       | 3,617.90<br>(3,273.74,4,001.97) | -0.05<br>(-0.06,-0.05) | 33.74<br>(19.49,48.72)    | 0.77<br>(0.47,1.09) | 1.06<br>(0.9,1.21)     | 31,597.49<br>(22,682.91,42,043.49)    | 1,282.33<br>(911.19,1,733.62)   | -0.01<br>(-0.02,0)     |
| <b>Singapore</b>                        | 259,832.08<br>(236,029.67,287,156.01)       | 3,533.38<br>(3,211.38,3,869.57) | -0.06<br>(-0.09,-0.03) | 40.77<br>(30.26,82.30)    | 0.56<br>(0.42,1.11) | -3.06<br>(-3.39,-2.74) | 58,330.96<br>(42,124.66,78,364.07)    | 2,011.22<br>(1,433.24,2,688.26) | 0.1<br>(0.08,0.11)     |
| <b>Slovakia</b>                         | 342,954.45<br>(310,147.30,384,649.49)       | 4,842.63<br>(4,370.44,5,408.01) | -0.05<br>(-0.06,-0.05) | 46.11<br>(28.92,61.06)    | 0.54<br>(0.34,0.71) | 2.18<br>(1.85,2.51)    | 85,372.50<br>(60,685.80,114,004.06)   | 1,540.60<br>(1,099.14,2,048.98) | 0.07<br>(0.06,0.08)    |
| <b>Slovenia</b>                         | 135,304.11<br>(122,472.79,149,927.47)       | 4,734.44<br>(4,247.12,5,256.53) | -0.05<br>(-0.06,-0.04) | 50.61<br>(26.56,70.65)    | 1.19<br>(0.65,1.65) | -0.9<br>(-1.21,-0.59)  | 34,031.71<br>(24,359.35,45,325.31)    | 1,521.17<br>(1,081.22,2,032.94) | 0.05<br>(0.04,0.07)    |
| <b>Solomon Islands</b>                  | 24,438.20<br>(21,868.70,27,273.16)          | 5,044.29<br>(4,571.92,5,567.67) | 0.06<br>(0.06,0.07)    | 5.32<br>(3.10,7.82)       | 1.20<br>(0.76,1.59) | 1.24<br>(1.07,1.41)    | 3,571.19<br>(2,553.41,4,750.45)       | 1,797.53<br>(1,299.20,2,363.31) | 0.18<br>(0.17,0.19)    |
| <b>Somalia</b>                          | 423,711.96                                  | 3,575.59                        | 0.05                   | 69.07                     | 1.08                | -0.07                  | 47,784.38                             | 1,209.76                        | 0.05                   |



|                                       |                                             |                                 |                        |                                 |                     |                        |                                         |                                 |                        |
|---------------------------------------|---------------------------------------------|---------------------------------|------------------------|---------------------------------|---------------------|------------------------|-----------------------------------------|---------------------------------|------------------------|
|                                       | (376,513.65,476,678.38)                     | (3,230.27,3,959.84)             | (0.04,0.05)            | (40.17,113.52)                  | (0.54,1.78)         | (-0.16,0.02)           | (34,068.09,63,341.40)                   | (849.24,1,630.78)               | (0.04,0.07)            |
| <b>South Africa</b>                   | 1,784,024.34<br>(1,624,557.18,1,971,336.06) | 3,398.51<br>(3,103.76,3,742.43) | -0.15<br>(-0.16,-0.14) | 914.81<br>(792.79,1,207.24)     | 2.09<br>(1.81,2.75) | -0.35<br>(-0.76,0.06)  | 379,424.82<br>(277,479.91,497,528.87)   | 1,425.12<br>(1,038.88,1,878.95) | -0.01<br>(-0.04,0.03)  |
| <b>South Sudan</b>                    | 215,330.53<br>(192,942.38,240,850.47)       | 3,595.29<br>(3,256.39,3,985.30) | 0.04<br>(0.03,0.05)    | 31.80<br>(17.00,53.47)          | 0.92<br>(0.48,1.49) | -0.19<br>(-0.31,-0.07) | 41,062.10<br>(29,267.59,54,627.86)      | 1,227.03<br>(861.58,1,656.24)   | 0.07<br>(0.05,0.09)    |
| <b>Spain</b>                          | 2,566,284.82<br>(2,321,945.77,2,859,885.95) | 4,128.88<br>(3,728.73,4,564.05) | -0.33<br>(-0.39,-0.28) | 1,374.42<br>(1,019.24,2,156.93) | 1.20<br>(0.92,1.94) | -4.03<br>(-4.35,-3.71) | 895,031.95<br>(645,300.31,1,177,684.49) | 1,831.22<br>(1,297.97,2,442.09) | -0.2<br>(-0.28,-0.12)  |
| <b>Sri Lanka</b>                      | 1,081,946.86<br>(979,417.69,1,193,581.16)   | 4,438.76<br>(4,018.07,4,886.70) | 0.07<br>(0.06,0.08)    | 75.24<br>(49.46,100.44)         | 0.33<br>(0.22,0.44) | 0.19<br>(-0.23,0.61)   | 241,344.03<br>(170,402.12,322,666.22)   | 1,760.07<br>(1,250.71,2,355.64) | 0.14<br>(0.13,0.15)    |
| <b>Sudan</b>                          | 1,233,421.74<br>(1,099,640.13,1,380,259.62) | 4,120.64<br>(3,725.10,4,577.02) | 0.02<br>(0.02,0.02)    | 170.71<br>(103.16,248.13)       | 0.74<br>(0.45,1.03) | 1.68<br>(1.63,1.72)    | 191,312.84<br>(136,000.05,254,272.06)   | 1,628.91<br>(1,149.10,2,149.50) | 0.3<br>(0.3,0.31)      |
| <b>Suriname</b>                       | 22,155.41<br>(20,010.61,24,535.52)          | 3,618.95<br>(3,282.06,4,008.70) | 0.06<br>(0.05,0.06)    | 13.66<br>(10.59,17.78)          | 2.41<br>(1.87,3.12) | 0.47<br>(0.05,0.89)    | 4,632.43<br>(3,325.62,6,172.64)         | 1,564.72<br>(1,147.37,2,044.56) | 0.23<br>(0.2,0.26)     |
| <b>Sweden</b>                         | 545,216.62<br>(496,846.95,598,925.86)       | 4,181.78<br>(3,795.09,4,595.86) | 0.00<br>(-0.02,0.03)   | 366.81<br>(242.05,484.50)       | 1.54<br>(1.05,2.07) | -0.21<br>(-0.46,0.05)  | 222,050.43<br>(161,097.69,292,146.76)   | 2,035.89<br>(1,472.32,2,692.11) | 0.04<br>(0.02,0.06)    |
| <b>Switzerland</b>                    | 477,522.91<br>(436,762.08,524,286.83)       | 4,236.50<br>(3,843.77,4,648.97) | -0.29<br>(-0.31,-0.27) | 322.41<br>(171.16,401.16)       | 1.55<br>(0.89,1.88) | -0.84<br>(-1.12,-0.55) | 216,748.19<br>(158,146.75,281,358.37)   | 2,256.56<br>(1,627.63,2,974.48) | -0.42<br>(-0.51,-0.34) |
| <b>Syrian Arab Republic</b>           | 596,532.85<br>(535,103.40,662,530.82)       | 4,184.19<br>(3,773.95,4,610.85) | -0.06<br>(-0.06,-0.06) | 37.97<br>(26.78,52.86)          | 0.32<br>(0.23,0.43) | 0.67<br>(0.38,0.96)    | 122,738.75<br>(87,658.43,163,941.33)    | 1,548.62<br>(1,075.72,2,074.37) | -0.15<br>(-0.19,-0.12) |
| <b>Taiwan<br/>(Province of China)</b> | 1,559,349.98<br>(1,426,350.21,1,717,178.77) | 4,795.86<br>(4,387.25,5,254.15) | -0.38<br>(-0.43,-0.33) | 495.54<br>(269.50,681.97)       | 1.36<br>(0.75,1.87) | 0.69<br>(0.02,1.36)    | 395,275.12<br>(283,524.90,522,955.76)   | 1,946.61<br>(1,408.28,2,595.86) | -0.14<br>(-0.2,-0.09)  |
| <b>Tajikistan</b>                     | 293,477.68<br>(262,974.14,329,943.06)       | 3,853.10<br>(3,489.26,4,302.37) | -0.08<br>(-0.09,-0.07) | 49.60<br>(37.73,63.12)          | 1.02<br>(0.76,1.28) | 1.53<br>(1.19,1.87)    | 46,088.76<br>(32,809.06,61,013.07)      | 1,290.75<br>(908.29,1,718.62)   | -0.02<br>(-0.03,-0.02) |
| <b>Thailand</b>                       | 4,046,627.86<br>(3,656,777.48,4,474,851.10) | 4,437.94<br>(4,007.05,4,904.42) | 0.12<br>(0.11,0.13)    | 1,464.91<br>(1,008.51,1,991.15) | 1.64<br>(1.13,2.23) | 0.99<br>(0.69,1.28)    | 916,180.43<br>(666,350.13,1,204,149.22) | 2,028.86<br>(1,467.65,2,658.44) | 0.25<br>(0.23,0.26)    |
| <b>Timor-Leste</b>                    | 45,826.55<br>(41,158.68,50,862.54)          | 4,473.11<br>(4,026.39,4,939.93) | -0.12<br>(-0.12,-0.11) | 6.16<br>(3.61,8.09)             | 0.67<br>(0.43,0.85) | 1.76<br>(1.49,2.03)    | 8,135.02<br>(5,728.73,10,973.20)        | 1,654.88<br>(1,163.59,2,219.59) | 0.03<br>(0,0.05)       |
| <b>Togo</b>                           | 206,939.94<br>(185,305.06,230,664.86)       | 3,603.42<br>(3,271.53,3,983.54) | 0.03<br>(0.02,0.03)    | 37.18<br>(22.14,50.50)          | 0.90<br>(0.55,1.20) | 1.02<br>(0.84,1.2)     | 26,020.62<br>(18,588.71,34,551.46)      | 1,350.37<br>(964.59,1,804.60)   | 0.19<br>(0.18,0.2)     |
| <b>Tokelau</b>                        | 68.23<br>(61.92,75.32)                      | 5,108.83<br>(4,626.42,5,637.82) | -0.02<br>(-0.03,-0.00) | 0.01<br>(0.01,0.02)             | 1.02<br>(0.58,1.46) | 0.57<br>(0.52,0.63)    | 24.21<br>(17.46,31.97)                  | 1,881.67<br>(1,368.13,2,479.24) | 0.11<br>(0.09,0.13)    |
| <b>Tonga</b>                          | 4,597.76<br>(4,158.48,5,069.29)             | 5,189.91<br>(4,703.15,5,720.32) | 0.00<br>(-0.0,0.01)    | 1.63<br>(1.18,2.18)             | 1.90<br>(1.39,2.54) | 0.64<br>(0.43,0.85)    | 1,330.81<br>(958.03,1,754.89)           | 1,976.43<br>(1,433.92,2,586.83) | 0.1<br>(0.08,0.11)     |

|                                               |                                                |                                 |                        |                                   |                     |                        |                                              |                                 |                        |
|-----------------------------------------------|------------------------------------------------|---------------------------------|------------------------|-----------------------------------|---------------------|------------------------|----------------------------------------------|---------------------------------|------------------------|
| <b>Trinidad and Tobago</b>                    | 59,926.42<br>(54,214.01,66,317.20)             | 3,598.79<br>(3,253.83,3,964.09) | -0.01<br>(-0.01,-0.01) | 39.41<br>(27.45,66.35)            | 2.40<br>(1.67,3.98) | -0.22<br>(-0.49,0.06)  | 15,671.40<br>(11,500.56,20,385.19)           | 1,623.29<br>(1,182.79,2,117.78) | 0.16<br>(0.14,0.19)    |
| <b>Tunisia</b>                                | 532,251.70<br>(480,470.70,590,134.61)          | 4,133.79<br>(3,733.55,4,575.87) | 0.03<br>(0.02,0.03)    | 76.83<br>(48.62,105.30)           | 0.66<br>(0.41,0.90) | 1.84<br>(1.72,1.97)    | 100,176.24<br>(71,828.93,133,215.54)         | 1,745.00<br>(1,258.11,2,306.24) | 0.33<br>(0.32,0.33)    |
| <b>Turkey</b>                                 | 4,197,375.96<br>(3,802,078.38,4,652,664.86)    | 4,578.67<br>(4,162.60,5,043.86) | -0.22<br>(-0.23,-0.20) | 964.84<br>(752.28,1,243.25)       | 1.14<br>(0.89,1.48) | -0.82<br>(-1.21,-0.43) | 918,238.86<br>(654,913.76,1,207,383.11)      | 1,937.77<br>(1,402.09,2,564.87) | -0.04<br>(-0.05,-0.03) |
| <b>Turkmenistan</b>                           | 186,207.45<br>(167,124.83,207,845.55)          | 3,934.07<br>(3,556.20,4,370.72) | -0.04<br>(-0.05,-0.03) | 9.71<br>(5.20,13.15)              | 0.26<br>(0.13,0.36) | 2.26<br>(1.93,2.59)    | 32,816.61<br>(23,459.56,43,756.41)           | 1,337.91<br>(944.52,1,801.26)   | 0.1<br>(0.08,0.11)     |
| <b>Tuvalu</b>                                 | 570.95<br>(516.78,629.15)                      | 5,103.08<br>(4,628.23,5,619.30) | -0.03<br>(-0.03,-0.02) | 0.11<br>(0.06,0.15)               | 1.06<br>(0.64,1.44) | 0.29<br>(0.27,0.32)    | 144.96<br>(105.26,192.49)                    | 1,875.79<br>(1,361.82,2,481.35) | 0.07<br>(0.06,0.08)    |
| <b>Uganda</b>                                 | 854,184.70<br>(761,086.05,954,687.55)          | 3,562.40<br>(3,223.35,3,952.81) | 0.03<br>(0.02,0.03)    | 149.82<br>(90.05,221.26)          | 1.09<br>(0.58,1.62) | 0.53<br>(0.43,0.62)    | 108,251.67<br>(76,557.92,143,990.63)         | 1,286.32<br>(904.15,1,722.82)   | 0.32<br>(0.3,0.34)     |
| <b>Ukraine</b>                                | 2,941,004.19<br>(2,658,743.73,3,256,849.03)    | 4,949.79<br>(4,472.19,5,453.97) | -0.02<br>(-0.02,-0.02) | 275.05<br>(98.18,392.21)          | 0.39<br>(0.15,0.55) | 3.86<br>(3.18,4.56)    | 977,738.72<br>(695,529.13,1,304,325.38)      | 1,593.42<br>(1,131.56,2,135.20) | 0.1<br>(0.07,0.13)     |
| <b>United Arab Emirates</b>                   | 459,887.35<br>(396,324.81,534,869.43)          | 4,157.53<br>(3,750.29,4,592.45) | 0.02<br>(0.01,0.03)    | 64.78<br>(39.23,101.97)           | 1.03<br>(0.60,1.46) | 1.35<br>(0.87,1.83)    | 22,229.37<br>(15,778.50,29,480.86)           | 1,712.57<br>(1,240.76,2,269.38) | 0.32<br>(0.31,0.33)    |
| <b>United Kingdom</b>                         | 3,912,763.88<br>(3,576,459.92,4,297,072.50)    | 4,652.87<br>(4,223.97,5,105.63) | -0.06<br>(-0.12,0.01)  | 3,426.67<br>(2,148.87,4,225.43)   | 2.47<br>(1.62,3.14) | -0.11<br>(-0.32,0.11)  | 1,683,501.72<br>(1,213,226.23,2,218,742.58)  | 2,313.74<br>(1,670.86,3,049.95) | -0.12<br>(-0.22,-0.02) |
| <b>United Republic of Tanzania</b>            | 1,298,024.87<br>(1,163,366.90,1,446,956.09)    | 3,512.65<br>(3,189.91,3,885.27) | -0.01<br>(-0.02,-0.00) | 270.40<br>(151.84,429.26)         | 1.15<br>(0.59,1.84) | 0.23<br>(0.14,0.31)    | 188,412.58<br>(135,494.48,249,850.88)        | 1,324.20<br>(945.95,1,761.01)   | 0.19<br>(0.17,0.2)     |
| <b>United States of America</b>               | 21,943,777.86<br>(20,302,421.38,23,735,440.76) | 5,471.08<br>(5,043.73,5,965.44) | -0.01<br>(-0.06,0.04)  | 10,850.65<br>(8,158.32,16,744.80) | 1.99<br>(1.52,3.11) | -0.06<br>(-0.27,0.16)  | 8,883,958.56<br>(6,455,297.71,11,714,708.56) | 3,330.59<br>(2,425.68,4,345.44) | 0.2<br>(0.16,0.25)     |
| <b>United States Virgin Islands</b>           | 4,927.25<br>(4,459.96,5,442.87)                | 3,625.33<br>(3,278.67,4,006.58) | 0.03<br>(0.02,0.03)    | 3.54<br>(2.65,4.46)               | 2.65<br>(1.96,3.36) | 0.44<br>(0.24,0.65)    | 1,539.81<br>(1,111.73,2,028.63)              | 1,628.68<br>(1,182.70,2,154.43) | 0.21<br>(0.2,0.22)     |
| <b>Uruguay</b>                                | 146,554.72<br>(133,642.84,160,499.07)          | 3,591.05<br>(3,255.96,3,948.64) | 0.16<br>(0.14,0.19)    | 57.55<br>(44.28,103.86)           | 1.02<br>(0.81,1.85) | -3.13<br>(-4.05,-2.2)  | 69,285.37<br>(49,487.04,91,821.10)           | 2,211.14<br>(1,586.59,2,926.77) | 0.31<br>(0.27,0.35)    |
| <b>Uzbekistan</b>                             | 1,169,626.12<br>(1,052,025.42,1,310,050.69)    | 3,945.02<br>(3,581.78,4,380.18) | 0.02<br>(0.02,0.02)    | 245.99<br>(178.31,373.87)         | 1.14<br>(0.86,1.84) | -0.02<br>(-0.55,0.5)   | 192,037.54<br>(137,864.23,254,390.24)        | 1,389.14<br>(994.47,1,842.67)   | 0.13<br>(0.1,0.16)     |
| <b>Vanuatu</b>                                | 12,523.17<br>(11,277.93,13,868.64)             | 5,390.74<br>(4,877.71,5,925.04) | 0.08<br>(0.07,0.08)    | 1.92<br>(1.13,2.68)               | 0.93<br>(0.58,1.29) | 1.37<br>(1.17,1.56)    | 1,817.91<br>(1,296.34,2,420.58)              | 1,936.89<br>(1,401.25,2,544.65) | 0.16<br>(0.15,0.18)    |
| <b>Venezuela<br/>(Bolivarian Republic of)</b> | 1,085,522.23<br>(976,341.89,1,199,080.89)      | 3,638.76<br>(3,275.96,4,005.98) | -0.06<br>(-0.07,-0.05) | 702.45<br>(473.51,1,126.48)       | 2.44<br>(1.64,3.93) | -0.21<br>(-1.13,0.72)  | 255,498.67<br>(185,954.55,335,235.47)        | 1,877.59<br>(1,371.69,2,458.39) | 0.1<br>(0.07,0.13)     |

|                 |                                             |                                 |                        |                             |                     |                     |                                         |                                 |                     |
|-----------------|---------------------------------------------|---------------------------------|------------------------|-----------------------------|---------------------|---------------------|-----------------------------------------|---------------------------------|---------------------|
| <b>Viet Nam</b> | 4,860,150.23<br>(4,371,665.20,5,400,775.91) | 4,684.22<br>(4,227.63,5,178.63) | 0.12<br>(0.12,0.13)    | 768.49<br>(528.95,1,030.58) | 0.85<br>(0.59,1.13) | 1.58<br>(1.53,1.63) | 839,557.18<br>(602,464.05,1,115,173.92) | 1,853.75<br>(1,334.36,2,458.15) | 0.32<br>(0.3,0.34)  |
| <b>Yemen</b>    | 926,722.39<br>(826,793.66,1,038,865.58)     | 4,146.78<br>(3,739.91,4,585.79) | -0.09<br>(-0.09,-0.08) | 102.90<br>(67.99,143.63)    | 0.66<br>(0.43,0.93) | 1.7<br>(1.59,1.82)  | 114,756.69<br>(82,099.58,153,483.15)    | 1,593.17<br>(1,127.74,2,096.24) | 0.14<br>(0.13,0.15) |
| <b>Zambia</b>   | 396,319.31<br>(352,550.22,442,982.38)       | 3,467.01<br>(3,136.20,3,848.21) | 0.23<br>(0.22,0.24)    | 93.23<br>(59.90,124.16)     | 1.40<br>(0.84,1.87) | 0.35<br>(0.25,0.46) | 49,991.77<br>(35,958.66,66,030.09)      | 1,331.82<br>(960.87,1,770.08)   | 0.45<br>(0.44,0.47) |
| <b>Zimbabwe</b> | 378,520.94<br>(337,805.73,422,342.83)       | 3,627.63<br>(3,284.65,4,033.58) | 0.12<br>(0.1,0.13)     | 79.50<br>(49.98,123.36)     | 1.03<br>(0.66,1.55) | 1.3<br>(0.93,1.67)  | 78,500.63<br>(56,360.64,104,814.55)     | 1,411.83<br>(1,015.34,1,871.83) | 0.18<br>(0.17,0.19) |

**Table S8.** The numbers (2019), ASRs per 100,000 (2019), and AAPCs (1990-2019) in incidence, death and DALY for RA in 204 countries.

| Characteristic             | Incident cases                     |                        |                     | Deaths                      |                     |                        | DALYs                              |                                         |                        |
|----------------------------|------------------------------------|------------------------|---------------------|-----------------------------|---------------------|------------------------|------------------------------------|-----------------------------------------|------------------------|
|                            | Numbers<br>(95% UI)                | ASIR<br>(95% UI)       | AAPC<br>(95% CI)    | Numbers<br>(95% UI)         | ASDR<br>(95% UI)    | AAPC<br>(95% CI)       | Numbers<br>(95% UI)                | Age-standardized DALYs rate<br>(95% UI) | AAPC<br>(95% CI)       |
| <b>Afghanistan</b>         | 1,337.71<br>(1,138.17,1,585.98)    | 4.40<br>(3.85,5.07)    | 0.39<br>(0.36,0.42) | 21.22<br>(12.46,31.20)      | 0.19<br>(0.11,0.27) | 1.37<br>(1.25,1.49)    | 3,204.56<br>(2,238.41,4,278.77)    | 15.80<br>(11.45,20.78)                  | 0.63<br>(0.58,0.67)    |
| <b>Albania</b>             | 276.81<br>(241.12,314.35)          | 8.69<br>(7.57,9.93)    | 1.19<br>(1.16,1.22) | 8.70<br>(4.49,12.75)        | 0.21<br>(0.11,0.31) | 3.8<br>(3.31,4.28)     | 954.98<br>(683.95,1,256.49)        | 25.99<br>(18.48,34.31)                  | 1.49<br>(1.38,1.6)     |
| <b>Algeria</b>             | 2,293.76<br>(1,982.58,2,669.86)    | 5.24<br>(4.55,6.05)    | 0.96<br>(0.91,1)    | 25.39<br>(14.47,37.25)      | 0.08<br>(0.05,0.12) | 0.3<br>(0.15,0.45)     | 6,391.45<br>(4,425.62,8,496.22)    | 15.69<br>(11.02,20.76)                  | 0.84<br>(0.79,0.89)    |
| <b>American Samoa</b>      | 2.71<br>(2.32,3.17)                | 4.87<br>(4.18,5.64)    | 0.25<br>(0.2,0.29)  | 0.07<br>(0.05,0.10)         | 0.15<br>(0.10,0.22) | 1.55<br>(0.89,2.21)    | 8.95<br>(6.36,11.89)               | 17.12<br>(12.25,22.68)                  | 0.51<br>(0.39,0.63)    |
| <b>Andorra</b>             | 18.90<br>(16.47,21.78)             | 16.32<br>(14.42,18.62) | 0.38<br>(0.32,0.45) | 0.22<br>(0.11,0.34)         | 0.16<br>(0.08,0.24) | -0.82<br>(-0.98,-0.65) | 50.24<br>(35.30,68.59)             | 40.19<br>(28.33,54.97)                  | 0.27<br>(0.22,0.33)    |
| <b>Angola</b>              | 2,262.77<br>(1,997.37,2,608.07)    | 11.68<br>(10.37,13.19) | 0.77<br>(0.73,0.8)  | 56.19<br>(32.02,79.77)      | 0.62<br>(0.36,0.87) | -0.77<br>(-0.94,-0.6)  | 5,597.19<br>(4,109.40,7,382.98)    | 38.36<br>(28.82,49.88)                  | 0.09<br>(-0.12,0.31)   |
| <b>Antigua and Barbuda</b> | 11.87<br>(10.44,13.50)             | 12.04<br>(10.69,13.63) | 0.76<br>(0.74,0.78) | 0.46<br>(0.30,0.65)         | 0.55<br>(0.35,0.76) | 0.56<br>(0.05,1.06)    | 38.12<br>(27.86,49.91)             | 37.33<br>(27.47,48.84)                  | 0.65<br>(0.51,0.79)    |
| <b>Argentina</b>           | 5,588.33<br>(5,004.74,6,262.88)    | 11.63<br>(10.40,13.06) | 0.59<br>(0.52,0.66) | 230.89<br>(160.77,356.94)   | 0.43<br>(0.30,0.65) | -1.97<br>(-2.46,-1.47) | 19,620.88<br>(14,733.99,25,177.71) | 38.89<br>(29.08,50.11)                  | 0.33<br>(0.26,0.41)    |
| <b>Armenia</b>             | 276.93<br>(242.77,314.95)          | 8.22<br>(7.23,9.43)    | 1.04<br>(0.97,1.12) | 7.77<br>(2.94,10.99)        | 0.19<br>(0.07,0.27) | 4.29<br>(3.63,4.96)    | 997.24<br>(698.11,1,340.09)        | 26.17<br>(18.30,35.28)                  | 1.41<br>(1.26,1.57)    |
| <b>Australia</b>           | 6,608.61<br>(5,898.45,7,383.00)    | 20.56<br>(18.26,23.09) | 0.36<br>(0.27,0.45) | 244.94<br>(167.17,330.29)   | 0.54<br>(0.37,0.74) | -1.97<br>(-2.14,-1.8)  | 18,831.32<br>(13,947.22,24,197.66) | 51.55<br>(37.82,66.76)                  | -0.21<br>(-0.28,-0.14) |
| <b>Austria</b>             | 1,444.85<br>(1,296.63,1,604.57)    | 13.00<br>(11.60,14.66) | 0.16<br>(0.06,0.26) | 53.43<br>(40.44,93.49)      | 0.27<br>(0.21,0.47) | -2.66<br>(-3.15,-2.18) | 5,032.81<br>(3,685.16,6,570.04)    | 37.16<br>(26.83,49.10)                  | -0.45<br>(-0.58,-0.31) |
| <b>Azerbaijan</b>          | 793.74<br>(673.87,931.31)          | 6.91<br>(5.94,8.03)    | 0.76<br>(0.67,0.85) | 6.17<br>(4.30,7.92)         | 0.08<br>(0.06,0.10) | 2.56<br>(2.34,2.77)    | 2,287.67<br>(1,565.92,3,175.58)    | 20.16<br>(14.07,27.70)                  | 0.83<br>(0.73,0.94)    |
| <b>Bahamas</b>             | 46.63<br>(40.61,53.63)             | 11.31<br>(9.95,12.93)  | 0.56<br>(0.53,0.59) | 1.60<br>(1.12,2.57)         | 0.49<br>(0.34,0.78) | -0.56<br>(-1.2,0.09)   | 155.14<br>(111.62,206.73)          | 37.42<br>(27.29,49.55)                  | 0.28<br>(0.15,0.4)     |
| <b>Bahrain</b>             | 154.63<br>(132.49,181.51)          | 8.06<br>(7.08,9.21)    | 1.2<br>(1.14,1.27)  | 2.77<br>(1.41,3.83)         | 0.37<br>(0.21,0.48) | 2.58<br>(1.68,3.48)    | 421.40<br>(301.84,562.92)          | 27.62<br>(20.44,35.73)                  | 1.3<br>(1.08,1.53)     |
| <b>Bangladesh</b>          | 30,925.95<br>(27,483.03,34,942.75) | 20.95<br>(18.66,23.49) | 1.24<br>(1.19,1.29) | 934.33<br>(594.71,1,308.86) | 0.85<br>(0.54,1.18) | -0.54<br>(-1.18,0.11)  | 73,226.40<br>(54,470.30,96,824.93) | 53.21<br>(39.96,69.81)                  | 0.64<br>(0.49,0.79)    |
| <b>Barbados</b>            | 54.68<br>(48.84,61.17)             | 15.05<br>(13.39,17.04) | 0.67<br>(0.65,0.7)  | 3.71<br>(2.55,5.96)         | 0.77<br>(0.53,1.22) | -0.04<br>(-0.28,0.21)  | 207.31<br>(151.66,269.32)          | 48.95<br>(35.63,64.18)                  | 0.47<br>(0.36,0.58)    |
| <b>Belarus</b>             | 655.49<br>(563.75,758.67)          | 6.17<br>(5.33,7.14)    | 0.88<br>(0.85,0.92) | 16.23<br>(6.56,23.96)       | 0.10<br>(0.04,0.15) | 2.33<br>(2.1,2.56)     | 2,590.73<br>(1,804.15,3,557.11)    | 19.47<br>(13.47,26.70)                  | 0.96<br>(0.88,1.04)    |
| <b>Belgium</b>             | 2,144.10<br>(1,926.47,2,384.22)    | 14.71<br>(13.15,16.64) | 0.42<br>(0.37,0.48) | 72.36<br>(47.09,95.14)      | 0.28<br>(0.19,0.38) | -2.04<br>(-2.25,-1.83) | 6,788.13<br>(4,997.20,8,859.57)    | 39.18<br>(28.20,52.18)                  | -0.03<br>(-0.1,0.04)   |
| <b>Belize</b>              | 46.68                              | 11.72                  | 0.79                | 1.19                        | 0.48                | 0.01                   | 133.07                             | 38.59                                   | 0.65                   |

|                                             |                                       |                        |                     |                                   |                     |                        |                                       |                        |                        |
|---------------------------------------------|---------------------------------------|------------------------|---------------------|-----------------------------------|---------------------|------------------------|---------------------------------------|------------------------|------------------------|
|                                             | (40.36,53.66)                         | (10.31,13.34)          | (0.77,0.82)         | (0.79,1.84)                       | (0.32,0.71)         | (-0.32,0.34)           | (97.27,175.71)                        | (28.53,50.51)          | (0.55,0.74)            |
| <b>Benin</b>                                | 356.47<br>(308.47,416.90)             | 4.83<br>(4.24,5.53)    | 0.52<br>(0.51,0.53) | 9.00<br>(5.61,13.34)              | 0.22<br>(0.14,0.33) | 0.67<br>(0.51,0.83)    | 814.48<br>(573.77,1,082.03)           | 13.35<br>(9.73,17.44)  | 0.61<br>(0.53,0.68)    |
| <b>Bermuda</b>                              | 9.72<br>(8.51,11.08)                  | 12.27<br>(10.66,14.14) | 0.92<br>(0.89,0.95) | 0.44<br>(0.24,0.66)               | 0.31<br>(0.17,0.46) | -1.52<br>(-1.7,-1.33)  | 35.42<br>(25.34,46.93)                | 35.68<br>(25.16,47.51) | 0.5<br>(0.45,0.56)     |
| <b>Bhutan</b>                               | 139.43<br>(123.97,158.28)             | 20.60<br>(18.47,22.93) | 1.35<br>(1.26,1.44) | 4.89<br>(2.99,8.31)               | 1.06<br>(0.65,1.78) | 0.23<br>(0.18,0.27)    | 341.72<br>(247.41,456.58)             | 56.15<br>(40.70,74.92) | 0.94<br>(0.87,1)       |
| <b>Bolivia<br/>(Plurinational State of)</b> | 1,563.96<br>(1,396.97,1,779.46)       | 14.38<br>(12.91,16.22) | 1.19<br>(1.16,1.22) | 75.85<br>(49.35,101.56)           | 1.05<br>(0.71,1.39) | 0.13<br>(0.04,0.22)    | 4,951.72<br>(3,678.60,6,424.89)       | 51.65<br>(39.30,65.88) | 0.84<br>(0.79,0.9)     |
| <b>Bosnia and Herzegovina</b>               | 562.41<br>(495.31,629.34)             | 13.12<br>(11.69,14.64) | 0.95<br>(0.82,1.08) | 18.57<br>(10.49,24.87)            | 0.33<br>(0.18,0.45) | 0.45<br>(-0.3,1.22)    | 1,930.56<br>(1,413.04,2,520.25)       | 37.70<br>(27.47,49.64) | 0.87<br>(0.79,0.95)    |
| <b>Botswana</b>                             | 363.27<br>(317.90,415.70)             | 16.39<br>(14.45,18.36) | 0.79<br>(0.72,0.86) | 9.05<br>(5.73,13.05)              | 0.76<br>(0.47,1.08) | -0.15<br>(-0.34,0.04)  | 950.12<br>(703.50,1,246.20)           | 54.13<br>(40.84,69.97) | 0.46<br>(0.38,0.54)    |
| <b>Brazil</b>                               | 27,906.76<br>(24,836.46,31,327.13)    | 11.98<br>(10.71,13.39) | 0.21<br>(0.18,0.23) | 621.46<br>(422.99,912.53)         | 0.27<br>(0.18,0.40) | -0.46<br>(-0.58,-0.34) | 103,504.87<br>(75,336.62,133,453.79)  | 42.60<br>(31.08,54.68) | 0.2<br>(0.18,0.22)     |
| <b>Brunei Darussalam</b>                    | 50.34<br>(43.76,58.27)                | 10.74<br>(9.56,12.15)  | 0.57<br>(0.54,0.6)  | 0.99<br>(0.71,1.37)               | 0.43<br>(0.28,0.62) | -0.64<br>(-0.94,-0.34) | 130.27<br>(94.39,173.49)              | 33.11<br>(24.60,42.63) | 0.22<br>(0.08,0.36)    |
| <b>Bulgaria</b>                             | 540.21<br>(467.54,621.18)             | 6.74<br>(5.84,7.81)    | 0.44<br>(0.4,0.48)  | 18.25<br>(11.40,25.36)            | 0.12<br>(0.08,0.17) | 1.64<br>(0.64,2.66)    | 2,165.95<br>(1,539.16,2,907.14)       | 20.33<br>(14.22,27.20) | 0.52<br>(0.38,0.65)    |
| <b>Burkina Faso</b>                         | 628.65<br>(542.81,731.88)             | 4.59<br>(4.02,5.24)    | 0.5<br>(0.47,0.53)  | 16.32<br>(10.41,23.18)            | 0.22<br>(0.14,0.32) | 0.4<br>(0.22,0.57)     | 1,470.10<br>(1,055.62,1,924.24)       | 13.15<br>(9.66,17.07)  | 0.51<br>(0.42,0.61)    |
| <b>Burundi</b>                              | 1,046.90<br>(935.03,1,179.99)         | 15.27<br>(13.74,16.95) | 0.52<br>(0.42,0.61) | 17.24<br>(8.71,26.67)             | 0.50<br>(0.23,0.75) | -0.97<br>(-1.13,-0.81) | 2,175.74<br>(1,578.05,2,898.98)       | 39.66<br>(29.08,52.90) | 0.05<br>(-0.01,0.1)    |
| <b>Cabo Verde</b>                           | 21.90<br>(18.75,25.53)                | 4.19<br>(3.63,4.84)    | 0.78<br>(0.75,0.81) | 0.69<br>(0.30,1.17)               | 0.19<br>(0.08,0.32) | 1.35<br>(1.21,1.5)     | 57.81<br>(39.07,78.37)                | 12.52<br>(8.51,16.78)  | 0.84<br>(0.76,0.91)    |
| <b>Cambodia</b>                             | 831.58<br>(728.75,961.96)             | 5.19<br>(4.58,5.93)    | 0.59<br>(0.56,0.62) | 24.62<br>(15.46,32.99)            | 0.24<br>(0.15,0.32) | 1.24<br>(1.18,1.29)    | 2,499.67<br>(1,835.09,3,300.10)       | 17.96<br>(13.48,23.43) | 0.7<br>(0.65,0.74)     |
| <b>Cameroon</b>                             | 960.12<br>(832.39,1,124.14)           | 5.29<br>(4.64,6.07)    | 0.57<br>(0.54,0.6)  | 23.55<br>(12.85,37.58)            | 0.25<br>(0.14,0.39) | 0.86<br>(0.73,0.98)    | 2,187.52<br>(1,513.72,2,918.46)       | 14.74<br>(10.41,19.32) | 0.68<br>(0.61,0.75)    |
| <b>Canada</b>                               | 11,666.96<br>(11,143.15,12,146.70)    | 22.58<br>(21.72,23.39) | 0.87<br>(0.84,0.9)  | 324.71<br>(177.48,408.88)         | 0.44<br>(0.25,0.55) | -1.11<br>(-1.34,-0.87) | 31,065.03<br>(22,873.44,39,974.29)    | 53.68<br>(39.19,69.38) | 0.42<br>(0.34,0.49)    |
| <b>Central African Republic</b>             | 374.76<br>(331.70,425.62)             | 9.85<br>(8.79,11.00)   | 0.05<br>(0.03,0.08) | 12.99<br>(7.83,18.80)             | 0.71<br>(0.41,1.02) | -0.92<br>(-1,-0.84)    | 1,060.42<br>(781.80,1,371.21)         | 37.54<br>(27.80,48.72) | -0.45<br>(-0.58,-0.33) |
| <b>Chad</b>                                 | 382.76<br>(331.55,442.33)             | 4.50<br>(3.94,5.10)    | 0.43<br>(0.41,0.45) | 10.40<br>(6.22,15.92)             | 0.22<br>(0.13,0.34) | 0.75<br>(0.62,0.89)    | 890.71<br>(642.21,1,185.36)           | 12.65<br>(9.20,16.57)  | 0.51<br>(0.49,0.54)    |
| <b>Chile</b>                                | 4,569.23<br>(4,122.72,5,066.06)       | 20.96<br>(18.91,23.47) | 1.26<br>(1.23,1.28) | 180.12<br>(112.24,253.47)         | 0.75<br>(0.47,1.06) | 0.41<br>(0.23,0.58)    | 14,399.66<br>(10,624.91,18,512.99)    | 62.20<br>(45.85,79.97) | 1.05<br>(0.99,1.11)    |
| <b>China</b>                                | 222,509.15<br>(198,117.81,247,767.87) | 11.74<br>(10.59,12.96) | 0.08<br>(0.05,0.11) | 10,833.52<br>(8,169.78,12,815.40) | 0.63<br>(0.46,0.74) | 0.17<br>(-0.3,0.63)    | 774,272.09<br>(588,395.27,980,702.35) | 39.47<br>(30.27,49.98) | 0.03<br>(-0.13,0.18)   |
| <b>Colombia</b>                             | 7,175.49<br>(6,431.31,8,025.90)       | 14.04<br>(12.55,15.76) | 0.81<br>(0.78,0.84) | 254.16<br>(174.27,402.83)         | 0.47<br>(0.32,0.75) | -1.51<br>(-1.98,-1.04) | 24,488.37<br>(17,981.78,31,969.98)    | 46.90<br>(34.41,61.20) | 0.15<br>(-0.15,0.44)   |

|                                              |                                 |                        |                        |                           |                     |                        |                                    |                        |                        |
|----------------------------------------------|---------------------------------|------------------------|------------------------|---------------------------|---------------------|------------------------|------------------------------------|------------------------|------------------------|
| <b>Comoros</b>                               | 105.78<br>(94.76,118.13)        | 17.79<br>(15.86,19.78) | 0.71<br>(0.66,0.76)    | 2.15<br>(0.87,3.35)       | 0.51<br>(0.20,0.79) | -0.48<br>(-0.8,-0.16)  | 234.97<br>(170.77,311.97)          | 44.81<br>(32.51,59.59) | 0.39<br>(0.33,0.45)    |
| <b>Congo</b>                                 | 502.93<br>(440.40,576.37)       | 11.66<br>(10.34,13.09) | 0.57<br>(0.53,0.61)    | 16.37<br>(7.76,24.32)     | 0.75<br>(0.38,1.06) | -1.01<br>(-1.21,-0.81) | 1,365.81<br>(963.88,1,807.22)      | 41.45<br>(29.66,53.85) | -0.23<br>(-0.38,-0.08) |
| <b>Cook Islands</b>                          | 0.92<br>(0.79,1.06)             | 5.05<br>(4.31,5.92)    | 0.62<br>(0.57,0.67)    | 0.02<br>(0.01,0.02)       | 0.06<br>(0.02,0.09) | 0.96<br>(0.86,1.06)    | 3.27<br>(2.23,4.44)                | 15.54<br>(10.51,21.22) | 0.64<br>(0.61,0.67)    |
| <b>Costa Rica</b>                            | 1,093.13<br>(979.14,1,218.51)   | 21.07<br>(18.86,23.48) | 0.92<br>(0.9,0.94)     | 41.65<br>(26.83,65.62)    | 0.81<br>(0.52,1.27) | 1.25<br>(0.81,1.69)    | 3,434.58<br>(2,546.73,4,402.02)    | 65.83<br>(48.87,84.40) | 1.03<br>(0.93,1.13)    |
| <b>Croatia</b>                               | 702.29<br>(621.17,793.16)       | 12.97<br>(11.49,14.74) | 0.85<br>(0.81,0.88)    | 39.72<br>(20.89,54.40)    | 0.43<br>(0.23,0.58) | 3.02<br>(2.32,3.73)    | 2,804.09<br>(2,067.89,3,609.72)    | 39.78<br>(29.08,51.55) | 1.09<br>(0.92,1.25)    |
| <b>Cuba</b>                                  | 1,610.28<br>(1,418.01,1,817.81) | 12.28<br>(10.78,13.98) | 0.84<br>(0.81,0.86)    | 69.51<br>(44.03,115.71)   | 0.35<br>(0.22,0.58) | -0.6<br>(-1.19,0)      | 6,389.33<br>(4,638.99,8,273.38)    | 39.98<br>(28.80,52.24) | 0.49<br>(0.37,0.62)    |
| <b>Cyprus</b>                                | 367.98<br>(328.09,417.06)       | 21.63<br>(19.31,24.50) | 0.83<br>(0.8,0.86)     | 12.35<br>(6.71,16.16)     | 0.65<br>(0.34,0.84) | -1.67<br>(-2.06,-1.27) | 1,020.67<br>(752.26,1,316.35)      | 55.82<br>(40.63,72.56) | 0.15<br>(-0.04,0.35)   |
| <b>Czechia</b>                               | 1,177.51<br>(1,009.15,1,355.13) | 9.48<br>(8.25,10.78)   | 0.71<br>(0.65,0.76)    | 32.48<br>(17.10,43.47)    | 0.15<br>(0.08,0.20) | -0.53<br>(-1.13,0.07)  | 4,382.21<br>(3,104.59,5,801.98)    | 27.60<br>(19.23,36.60) | 0.44<br>(0.33,0.55)    |
| <b>Côte d'Ivoire</b>                         | 815.64<br>(698.71,959.35)       | 4.91<br>(4.27,5.60)    | 0.45<br>(0.42,0.48)    | 15.68<br>(9.72,23.31)     | 0.20<br>(0.13,0.30) | 0.5<br>(0.37,0.63)     | 1,764.20<br>(1,251.29,2,335.31)    | 13.07<br>(9.60,17.13)  | 0.53<br>(0.47,0.6)     |
| <b>Democratic People's Republic of Korea</b> | 3,108.59<br>(2,732.42,3,529.33) | 9.86<br>(8.72,11.08)   | -0.36<br>(-0.38,-0.33) | 220.74<br>(133.86,368.00) | 0.73<br>(0.44,1.20) | 1.22<br>(1.12,1.31)    | 13,057.96<br>(9,347.64,17,309.18)  | 40.57<br>(29.09,53.78) | 0.21<br>(0.17,0.25)    |
| <b>Democratic Republic of the Congo</b>      | 5,911.84<br>(5,182.51,6,751.92) | 10.09<br>(8.93,11.47)  | 0.39<br>(0.28,0.5)     | 195.95<br>(91.90,291.26)  | 0.64<br>(0.31,0.95) | -0.74<br>(-0.82,-0.66) | 15,830.09<br>(11,440.96,20,736.14) | 35.34<br>(25.24,45.85) | -0.08<br>(-0.23,0.07)  |
| <b>Denmark</b>                               | 1,778.11<br>(1,618.40,1,960.11) | 20.66<br>(18.87,22.97) | 0.51<br>(0.49,0.54)    | 86.49<br>(55.16,116.91)   | 0.68<br>(0.45,0.94) | -0.18<br>(-0.59,0.23)  | 5,204.15<br>(3,946.14,6,688.75)    | 52.52<br>(39.06,68.01) | 0.26<br>(0.17,0.34)    |
| <b>Djibouti</b>                              | 179.72<br>(159.46,203.64)       | 19.11<br>(17.11,21.32) | 0.67<br>(0.62,0.73)    | 2.29<br>(1.12,3.61)       | 0.55<br>(0.24,0.85) | -0.24<br>(-0.4,-0.09)  | 350.23<br>(249.10,467.77)          | 48.64<br>(35.13,64.38) | 0.49<br>(0.39,0.59)    |
| <b>Dominica</b>                              | 8.58<br>(7.71,9.63)             | 11.13<br>(9.94,12.60)  | 0.36<br>(0.33,0.39)    | 0.56<br>(0.41,0.74)       | 0.63<br>(0.46,0.82) | 0<br>(-0.16,0.15)      | 29.87<br>(22.49,38.53)             | 36.30<br>(26.88,47.11) | 0.15<br>(0.1,0.21)     |
| <b>Dominican Republic</b>                    | 877.97<br>(751.24,1,041.21)     | 8.01<br>(6.87,9.41)    | 0.82<br>(0.81,0.83)    | 42.74<br>(17.92,63.70)    | 0.55<br>(0.22,0.83) | -1.49<br>(-2.23,-0.75) | 2,716.36<br>(1,942.42,3,603.71)    | 27.00<br>(19.47,35.69) | 0.29<br>(0.15,0.43)    |
| <b>Ecuador</b>                               | 3,060.30<br>(2,733.22,3,458.54) | 18.00<br>(16.19,20.23) | 1.31<br>(1.29,1.32)    | 136.30<br>(99.69,201.51)  | 1.06<br>(0.77,1.59) | -0.3<br>(-0.6,0)       | 9,306.68<br>(6,807.11,11,922.46)   | 58.82<br>(43.61,74.98) | 0.78<br>(0.64,0.92)    |
| <b>Egypt</b>                                 | 4,763.42<br>(4,071.48,5,604.62) | 4.91<br>(4.20,5.70)    | 0.96<br>(0.88,1.03)    | 27.75<br>(14.60,44.52)    | 0.05<br>(0.03,0.08) | -0.01<br>(-0.49,0.48)  | 12,078.37<br>(7,915.53,16,782.58)  | 14.19<br>(9.41,19.49)  | 0.83<br>(0.76,0.89)    |
| <b>El Salvador</b>                           | 740.62<br>(646.97,852.46)       | 11.89<br>(10.42,13.66) | 1.07<br>(1.02,1.11)    | 18.32<br>(12.91,26.41)    | 0.28<br>(0.20,0.41) | -1.02<br>(-1.68,-0.35) | 2,155.77<br>(1,520.33,2,884.40)    | 35.75<br>(25.11,47.93) | 0.62<br>(0.39,0.85)    |
| <b>Equatorial Guinea</b>                     | 110.57<br>(96.57,127.84)        | 12.33<br>(10.92,13.97) | 1.38<br>(1.3,1.45)     | 2.57<br>(1.31,4.09)       | 0.65<br>(0.35,1.00) | -0.82<br>(-1,-0.63)    | 255.75<br>(181.05,342.77)          | 39.98<br>(28.86,52.86) | 0.27<br>(0.19,0.35)    |
| <b>Eritrea</b>                               | 743.38<br>(660.99,840.33)       | 17.44<br>(15.51,19.50) | 0.82<br>(0.77,0.88)    | 12.62<br>(5.64,19.58)     | 0.66<br>(0.25,1.02) | 0.3<br>(0.19,0.42)     | 1,495.89<br>(1,082.88,1,973.17)    | 46.55<br>(33.69,61.04) | 0.56<br>(0.42,0.7)     |
| <b>Estonia</b>                               | 257.26                          | 16.91                  | 0.69                   | 11.98                     | 0.46                | -2.55                  | 1,097.94                           | 54.04                  | -0.36                  |



|                      |                                    |                        |                     |                           |                     |                        |                                    |                         |                        |
|----------------------|------------------------------------|------------------------|---------------------|---------------------------|---------------------|------------------------|------------------------------------|-------------------------|------------------------|
|                      | (235.14,279.46)                    | (15.45,18.42)          | (0.62,0.75)         | (7.60,17.99)              | (0.30,0.68)         | (-3.06,-2.04)          | (813.90,1,395.33)                  | (39.71,69.46)           | (-0.51,-0.2)           |
| <b>Eswatini</b>      | 156.31<br>(138.50,177.39)          | 16.51<br>(14.82,18.31) | 0.33<br>(0.24,0.42) | 3.86<br>(2.43,5.75)       | 0.77<br>(0.48,1.12) | 0.13<br>(-0.13,0.4)    | 407.34<br>(295.79,533.09)          | 55.63<br>(40.68,72.03)  | 0.25<br>(0.1,0.39)     |
| <b>Ethiopia</b>      | 9,327.30<br>(8,369.70,10,358.73)   | 15.19<br>(13.61,16.84) | 0.2<br>(0.14,0.25)  | 166.03<br>(75.46,253.41)  | 0.50<br>(0.22,0.75) | -1.48<br>(-1.61,-1.35) | 19,289.54<br>(14,088.42,25,762.97) | 39.32<br>(28.56,52.40)  | -0.4<br>(-0.48,-0.33)  |
| <b>Fiji</b>          | 37.78<br>(31.75,44.77)             | 4.04<br>(3.41,4.79)    | 0.33<br>(0.24,0.42) | 0.36<br>(0.24,0.53)       | 0.05<br>(0.04,0.08) | -0.13<br>(-0.45,0.19)  | 112.34<br>(77.41,154.54)           | 12.56<br>(8.74,17.24)   | 0.24<br>(0.15,0.34)    |
| <b>Finland</b>       | 2,237.85<br>(2,054.94,2,440.47)    | 27.89<br>(25.50,30.76) | 0.37<br>(0.29,0.46) | 91.91<br>(52.61,112.60)   | 0.68<br>(0.39,0.82) | -1.52<br>(-1.9,-1.13)  | 6,884.37<br>(5,109.82,8,842.70)    | 69.48<br>(50.79,89.94)  | -0.23<br>(-0.37,-0.09) |
| <b>France</b>        | 11,644.49<br>(10,369.87,13,076.92) | 13.70<br>(12.15,15.43) | 0.53<br>(0.48,0.58) | 440.80<br>(231.73,573.06) | 0.27<br>(0.16,0.35) | -2.09<br>(-2.24,-1.93) | 37,135.90<br>(26,863.45,49,096.30) | 36.51<br>(26.02,48.06)  | 0.03<br>(-0.06,0.12)   |
| <b>Gabon</b>         | 184.05<br>(163.02,210.64)          | 12.29<br>(10.93,13.92) | 0.76<br>(0.72,0.79) | 6.00<br>(3.52,8.43)       | 0.67<br>(0.40,0.95) | -0.95<br>(-1.13,-0.78) | 496.56<br>(364.80,646.39)          | 40.38<br>(30.05,51.80)  | 0.01<br>(-0.1,0.11)    |
| <b>Gambia</b>        | 66.43<br>(57.53,77.76)             | 4.75<br>(4.12,5.46)    | 0.46<br>(0.43,0.49) | 2.19<br>(1.27,3.43)       | 0.25<br>(0.15,0.40) | 1.39<br>(1,1.78)       | 160.32<br>(115.54,214.32)          | 13.69<br>(9.99,18.07)   | 0.84<br>(0.69,0.99)    |
| <b>Georgia</b>       | 313.69<br>(264.97,364.25)          | 7.73<br>(6.58,8.94)    | 0.34<br>(0.23,0.45) | 6.39<br>(2.33,9.21)       | 0.11<br>(0.04,0.15) | 4.17<br>(3.53,4.82)    | 1,102.28<br>(776.09,1,487.73)      | 22.82<br>(15.91,30.84)  | 0.54<br>(0.44,0.65)    |
| <b>Germany</b>       | 13,102.52<br>(11,572.97,14,681.59) | 12.18<br>(10.72,13.90) | 0.3<br>(0.24,0.35)  | 507.75<br>(333.82,657.02) | 0.24<br>(0.16,0.30) | -2.56<br>(-2.95,-2.16) | 46,025.47<br>(33,861.88,60,915.22) | 34.13<br>(24.55,45.90)  | -0.13<br>(-0.23,-0.03) |
| <b>Ghana</b>         | 1,151.52<br>(987.74,1,354.85)      | 5.10<br>(4.38,5.94)    | 0.82<br>(0.76,0.87) | 19.89<br>(12.79,29.24)    | 0.17<br>(0.11,0.25) | 1.74<br>(1.47,2)       | 2,458.59<br>(1,715.24,3,353.34)    | 12.76<br>(9.13,16.92)   | 0.94<br>(0.87,1.01)    |
| <b>Greece</b>        | 1,422.52<br>(1,261.56,1,615.32)    | 11.50<br>(10.24,12.91) | 0.38<br>(0.34,0.43) | 44.22<br>(30.55,68.75)    | 0.16<br>(0.10,0.23) | 1.85<br>(0.23,3.5)     | 5,110.71<br>(3,628.73,6,803.00)    | 32.35<br>(23.02,43.57)  | 0.48<br>(0.31,0.65)    |
| <b>Greenland</b>     | 10.61<br>(9.47,11.82)              | 15.04<br>(13.63,16.78) | 1.23<br>(1.2,1.25)  | 0.32<br>(0.24,0.41)       | 0.50<br>(0.38,0.63) | 2.03<br>(1.21,2.85)    | 29.86<br>(22.34,38.93)             | 41.89<br>(31.44,54.39)  | 1.48<br>(1.25,1.71)    |
| <b>Grenada</b>       | 8.98<br>(7.75,10.33)               | 8.09<br>(7.01,9.33)    | 0.82<br>(0.78,0.86) | 0.20<br>(0.13,0.33)       | 0.23<br>(0.15,0.38) | 0.69<br>(0.36,1.02)    | 27.84<br>(19.18,36.97)             | 24.67<br>(17.19,32.69)  | 0.72<br>(0.66,0.77)    |
| <b>Guam</b>          | 8.35<br>(7.06,9.83)                | 4.85<br>(4.11,5.71)    | 0.27<br>(0.23,0.32) | 0.16<br>(0.11,0.24)       | 0.08<br>(0.06,0.13) | 1.81<br>(1.03,2.6)     | 28.64<br>(19.54,38.63)             | 15.74<br>(10.70,21.30)  | 0.43<br>(0.35,0.5)     |
| <b>Guatemala</b>     | 2,270.70<br>(1,998.03,2,612.02)    | 14.95<br>(13.31,16.83) | 1.39<br>(1.35,1.43) | 80.30<br>(36.21,112.05)   | 0.82<br>(0.34,1.15) | 2.04<br>(1.28,2.8)     | 6,430.99<br>(4,795.54,8,386.78)    | 49.55<br>(36.51,64.69)  | 1.61<br>(1.36,1.85)    |
| <b>Guinea</b>        | 365.03<br>(315.79,425.65)          | 4.77<br>(4.17,5.51)    | 0.48<br>(0.46,0.51) | 11.05<br>(6.57,17.67)     | 0.23<br>(0.14,0.37) | 0.78<br>(0.68,0.88)    | 880.95<br>(638.24,1,150.32)        | 13.47<br>(9.90,17.51)   | 0.58<br>(0.56,0.61)    |
| <b>Guinea-Bissau</b> | 53.10<br>(45.77,62.11)             | 4.56<br>(4.00,5.18)    | 0.4<br>(0.38,0.42)  | 1.59<br>(0.92,2.44)       | 0.29<br>(0.16,0.44) | 1.01<br>(0.88,1.13)    | 128.93<br>(93.29,168.63)           | 14.22<br>(10.37,18.53)  | 0.62<br>(0.56,0.68)    |
| <b>Guyana</b>        | 60.21<br>(52.06,69.81)             | 7.71<br>(6.71,8.87)    | 0.82<br>(0.78,0.87) | 1.31<br>(0.91,2.01)       | 0.27<br>(0.18,0.39) | 4.09<br>(3.3,4.89)     | 179.78<br>(127.44,235.82)          | 24.91<br>(17.99,32.38)  | 1.28<br>(1.17,1.39)    |
| <b>Haiti</b>         | 1,236.94<br>(1,080.03,1,416.80)    | 10.95<br>(9.70,12.32)  | 0.71<br>(0.66,0.77) | 30.81<br>(17.33,45.10)    | 0.58<br>(0.34,0.83) | -0.81<br>(-0.9,-0.72)  | 3,471.75<br>(2,468.98,4,560.95)    | 37.93<br>(27.34,48.92)  | 0.32<br>(0.24,0.4)     |
| <b>Honduras</b>      | 2,091.97<br>(1,878.43,2,330.62)    | 25.06<br>(22.49,27.68) | 0.99<br>(0.95,1.02) | 85.51<br>(46.97,116.18)   | 1.62<br>(0.90,2.15) | 0.97<br>(0.62,1.32)    | 6,266.99<br>(4,646.27,8,048.07)    | 90.15<br>(66.48,114.15) | 0.9<br>(0.76,1.03)     |

|                                         |                                       |                        |                        |                                   |                     |                        |                                       |                        |                        |
|-----------------------------------------|---------------------------------------|------------------------|------------------------|-----------------------------------|---------------------|------------------------|---------------------------------------|------------------------|------------------------|
| <b>Hungary</b>                          | 1,388.68<br>(1,256.42,1,531.89)       | 11.62<br>(10.53,12.85) | 0.43<br>(0.38,0.47)    | 59.02<br>(38.87,89.19)            | 0.30<br>(0.20,0.46) | -2.56<br>(-2.98,-2.13) | 5,463.83<br>(4,000.44,7,079.96)       | 35.46<br>(25.55,46.08) | -0.43<br>(-0.54,-0.33) |
| <b>Iceland</b>                          | 53.71<br>(47.53,60.01)                | 13.33<br>(11.76,15.17) | 0.28<br>(0.22,0.33)    | 1.52<br>(1.02,2.14)               | 0.25<br>(0.18,0.37) | -1.48<br>(-1.76,-1.2)  | 169.15<br>(121.69,223.85)             | 37.07<br>(26.55,49.56) | -0.03<br>(-0.1,0.05)   |
| <b>India</b>                            | 222,903.67<br>(201,190.54,246,448.06) | 17.40<br>(15.70,19.20) | 0.18<br>(0.18,0.19)    | 12,359.95<br>(8,150.57,16,252.30) | 1.34<br>(0.88,1.76) | -0.07<br>(-0.76,0.63)  | 608,654.23<br>(471,555.30,762,236.77) | 52.52<br>(40.78,65.17) | 0.14<br>(-0.15,0.44)   |
| <b>Indonesia</b>                        | 11,396.00<br>(10,134.39,12,824.95)    | 4.07<br>(3.63,4.55)    | 0.04<br>(0.02,0.05)    | 391.71<br>(215.87,513.05)         | 0.22<br>(0.12,0.28) | 1.89<br>(1.83,1.95)    | 37,364.49<br>(27,864.69,48,180.48)    | 14.83<br>(11.16,18.89) | 0.42<br>(0.39,0.45)    |
| <b>Iran<br/>(Islamic Republic of)</b>   | 4,684.21<br>(4,127.72,5,302.60)       | 5.04<br>(4.47,5.64)    | 0.26<br>(0.23,0.29)    | 83.45<br>(35.69,107.34)           | 0.12<br>(0.05,0.16) | 0.33<br>(0.13,0.53)    | 15,365.80<br>(10,876.54,20,208.52)    | 17.31<br>(12.37,22.67) | 0.32<br>(0.28,0.35)    |
| <b>Iraq</b>                             | 2,057.12<br>(1,767.23,2,418.99)       | 5.03<br>(4.34,5.80)    | 0.8<br>(0.71,0.89)     | 25.24<br>(17.73,38.45)            | 0.13<br>(0.09,0.19) | 0.98<br>(0.74,1.22)    | 5,247.80<br>(3,609.75,7,184.54)       | 16.09<br>(11.34,21.81) | 0.75<br>(0.7,0.81)     |
| <b>Ireland</b>                          | 1,895.36<br>(1,696.50,2,098.83)       | 30.03<br>(26.97,33.31) | 0.56<br>(0.52,0.61)    | 63.05<br>(39.85,78.38)            | 0.81<br>(0.51,1.01) | -1.72<br>(-1.92,-1.51) | 5,146.97<br>(3,811.29,6,582.02)       | 74.84<br>(55.16,96.37) | -0.12<br>(-0.29,0.06)  |
| <b>Israel</b>                           | 1,097.02<br>(966.52,1,254.92)         | 11.43<br>(9.99,13.08)  | 0.62<br>(0.6,0.65)     | 28.19<br>(19.30,40.30)            | 0.23<br>(0.15,0.32) | 0.23<br>(-0.11,0.58)   | 3,229.82<br>(2,299.93,4,280.12)       | 31.75<br>(22.33,42.39) | 0.57<br>(0.52,0.62)    |
| <b>Italy</b>                            | 12,476.51<br>(11,195.92,13,935.44)    | 13.81<br>(12.40,15.31) | -0.04<br>(-0.05,-0.02) | 634.78<br>(448.41,962.69)         | 0.37<br>(0.26,0.55) | -1.06<br>(-1.21,-0.9)  | 39,605.02<br>(29,588.00,50,839.88)    | 35.78<br>(26.41,46.35) | -0.31<br>(-0.34,-0.29) |
| <b>Jamaica</b>                          | 275.73<br>(240.08,318.72)             | 9.12<br>(8.00,10.53)   | 0.75<br>(0.69,0.8)     | 14.65<br>(8.78,34.77)             | 0.41<br>(0.25,0.96) | 1.03<br>(0.38,1.68)    | 927.94<br>(656.11,1,268.08)           | 30.43<br>(21.47,41.35) | 0.86<br>(0.71,1.01)    |
| <b>Japan</b>                            | 26,450.32<br>(23,575.50,29,570.81)    | 14.81<br>(13.23,16.41) | -0.12<br>(-0.22,-0.02) | 1,568.82<br>(842.45,1,909.35)     | 0.37<br>(0.22,0.45) | -2.86<br>(-3.03,-2.69) | 98,687.02<br>(73,542.04,126,828.88)   | 39.67<br>(29.42,51.46) | -0.7<br>(-0.82,-0.57)  |
| <b>Jordan</b>                           | 585.84<br>(499.27,693.02)             | 5.04<br>(4.33,5.90)    | 1.03<br>(0.9,1.16)     | 4.80<br>(3.53,7.28)               | 0.08<br>(0.06,0.13) | -0.4<br>(-0.75,-0.05)  | 1,487.28<br>(996.70,2,044.12)         | 15.46<br>(10.55,20.81) | 0.8<br>(0.73,0.88)     |
| <b>Kazakhstan</b>                       | 4,821.68<br>(4,373.54,5,334.85)       | 25.50<br>(23.45,28.01) | 0.98<br>(0.9,1.05)     | 28.01<br>(5.55,39.93)             | 0.19<br>(0.03,0.28) | 6.37<br>(5.13,7.63)    | 10,146.45<br>(7,065.91,13,762.34)     | 56.89<br>(39.76,76.63) | 1.19<br>(1.07,1.31)    |
| <b>Kenya</b>                            | 5,879.74<br>(5,271.96,6,550.85)       | 17.93<br>(16.06,19.92) | -0.08<br>(-0.09,-0.07) | 98.41<br>(46.31,145.78)           | 0.61<br>(0.25,0.90) | 0.58<br>(0.49,0.67)    | 11,926.10<br>(8,748.00,15,540.52)     | 46.21<br>(34.06,59.78) | 0.06<br>(0.03,0.08)    |
| <b>Kiribati</b>                         | 4.04<br>(3.41,4.80)                   | 3.47<br>(2.96,4.10)    | 0.24<br>(0.18,0.3)     | 0.09<br>(0.04,0.14)               | 0.14<br>(0.06,0.21) | 0.76<br>(0.59,0.94)    | 13.05<br>(9.05,17.54)                 | 13.58<br>(9.51,17.93)  | 0.37<br>(0.32,0.42)    |
| <b>Kuwait</b>                           | 307.07<br>(253.89,372.53)             | 5.70<br>(4.87,6.66)    | 0.99<br>(0.93,1.06)    | 1.41<br>(0.72,1.95)               | 0.06<br>(0.03,0.09) | 5.45<br>(4.36,6.55)    | 796.87<br>(523.89,1,108.70)           | 16.46<br>(11.15,22.65) | 1.19<br>(1.07,1.31)    |
| <b>Kyrgyzstan</b>                       | 1,146.61<br>(1,018.89,1,299.77)       | 19.04<br>(17.13,21.25) | 0.89<br>(0.86,0.93)    | 48.64<br>(29.08,62.39)            | 1.30<br>(0.70,1.66) | 1.66<br>(0.92,2.41)    | 3,570.46<br>(2,677.45,4,597.23)       | 68.43<br>(51.99,87.51) | 0.8<br>(0.58,1.03)     |
| <b>Lao People's Democratic Republic</b> | 336.79<br>(292.71,394.48)             | 5.02<br>(4.40,5.76)    | 0.59<br>(0.57,0.6)     | 7.41<br>(4.77,10.08)              | 0.20<br>(0.13,0.26) | 0.48<br>(0.4,0.57)     | 929.15<br>(670.95,1,245.98)           | 16.65<br>(12.23,21.92) | 0.49<br>(0.45,0.52)    |
| <b>Latvia</b>                           | 315.99<br>(285.18,350.16)             | 14.42<br>(12.92,16.06) | 0.58<br>(0.48,0.68)    | 16.41<br>(10.04,24.08)            | 0.42<br>(0.26,0.61) | -1.52<br>(-2.13,-0.9)  | 1,452.21<br>(1,082.29,1,853.04)       | 47.66<br>(35.11,61.24) | -0.13<br>(-0.19,-0.07) |
| <b>Lebanon</b>                          | 289.35<br>(245.67,341.29)             | 5.41<br>(4.58,6.31)    | 1.13<br>(1.08,1.19)    | 4.78<br>(2.31,8.39)               | 0.09<br>(0.04,0.16) | 0.97<br>(0.9,1.04)     | 893.78<br>(628.26,1,210.92)           | 16.73<br>(11.80,22.50) | 1.11<br>(1.07,1.16)    |
| <b>Lesotho</b>                          | 263.85                                | 14.10                  | 0.27                   | 10.18                             | 0.92                | 1.07                   | 801.78                                | 53.11                  | 0.54                   |

|                                             |                                    |                        |                        |                                 |                     |                        |                                      |                         |                       |
|---------------------------------------------|------------------------------------|------------------------|------------------------|---------------------------------|---------------------|------------------------|--------------------------------------|-------------------------|-----------------------|
|                                             | (232.35,301.86)                    | (12.58,15.75)          | (0.17,0.37)            | (6.36,15.22)                    | (0.56,1.37)         | (0.92,1.22)            | (595.10,1,029.62)                    | (40.02,68.04)           | (0.34,0.75)           |
| <b>Liberia</b>                              | 155.16<br>(132.81,183.51)          | 4.87<br>(4.24,5.58)    | 0.58<br>(0.55,0.62)    | 3.25<br>(1.86,4.98)             | 0.20<br>(0.12,0.31) | 0.47<br>(0.18,0.77)    | 342.93<br>(247.83,458.21)            | 13.10<br>(9.59,17.00)   | 0.59<br>(0.49,0.69)   |
| <b>Libya</b>                                | 356.16<br>(297.09,425.83)          | 4.65<br>(3.92,5.47)    | 0.81<br>(0.75,0.88)    | 4.47<br>(2.32,6.50)             | 0.09<br>(0.05,0.14) | 1.64<br>(1.33,1.96)    | 1,011.95<br>(700.01,1,372.90)        | 14.69<br>(10.34,19.64)  | 0.89<br>(0.8,0.97)    |
| <b>Lithuania</b>                            | 472.23<br>(424.71,519.40)          | 14.95<br>(13.43,16.48) | 0.41<br>(0.28,0.55)    | 25.58<br>(15.80,37.01)          | 0.46<br>(0.28,0.67) | -1.9<br>(-2.44,-1.36)  | 2,219.72<br>(1,653.06,2,810.66)      | 50.89<br>(37.29,64.88)  | -0.38<br>(-0.6,-0.16) |
| <b>Luxembourg</b>                           | 93.58<br>(82.84,105.96)            | 12.33<br>(10.93,13.91) | 0.43<br>(0.4,0.46)     | 2.63<br>(1.83,3.98)             | 0.25<br>(0.17,0.38) | -1.79<br>(-1.87,-1.72) | 293.13<br>(212.36,385.28)            | 34.34<br>(24.65,45.65)  | -0.02<br>(-0.07,0.04) |
| <b>Madagascar</b>                           | 2,609.22<br>(2,329.58,2,961.18)    | 15.15<br>(13.60,16.81) | 0.42<br>(0.39,0.46)    | 39.52<br>(17.86,56.75)          | 0.48<br>(0.20,0.70) | -0.35<br>(-0.52,-0.19) | 5,339.66<br>(3,859.92,6,934.36)      | 39.80<br>(29.21,51.57)  | 0.2<br>(0.11,0.29)    |
| <b>Malawi</b>                               | 1,847.56<br>(1,656.33,2,073.81)    | 17.74<br>(16.04,19.62) | 0.55<br>(0.52,0.59)    | 31.61<br>(13.65,49.17)          | 0.54<br>(0.22,0.84) | -0.49<br>(-0.62,-0.36) | 3,773.82<br>(2,760.03,4,974.49)      | 44.90<br>(32.98,59.88)  | 0.26<br>(0.17,0.35)   |
| <b>Malaysia</b>                             | 1,575.91<br>(1,339.55,1,855.81)    | 4.77<br>(4.07,5.57)    | 0.58<br>(0.55,0.61)    | 25.13<br>(15.89,53.66)          | 0.10<br>(0.06,0.23) | 0.25<br>(-0.5,1.01)    | 4,544.31<br>(3,145.60,6,177.53)      | 14.70<br>(10.18,19.95)  | 0.45<br>(0.32,0.59)   |
| <b>Maldives</b>                             | 30.88<br>(25.93,37.15)             | 5.86<br>(5.10,6.77)    | 0.73<br>(0.56,0.9)     | 0.36<br>(0.22,0.48)             | 0.14<br>(0.09,0.19) | -1.32<br>(-1.59,-1.05) | 76.56<br>(52.86,105.41)              | 17.57<br>(12.44,23.67)  | 0.35<br>(0.24,0.46)   |
| <b>Mali</b>                                 | 610.70<br>(528.13,711.50)          | 4.88<br>(4.26,5.60)    | 0.65<br>(0.63,0.68)    | 16.92<br>(10.31,25.93)          | 0.24<br>(0.15,0.37) | 0.5<br>(0.43,0.57)     | 1,433.54<br>(1,014.95,1,893.75)      | 13.85<br>(10.15,18.13)  | 0.61<br>(0.55,0.67)   |
| <b>Malta</b>                                | 62.89<br>(56.61,69.99)             | 11.62<br>(10.31,13.15) | 0.39<br>(0.35,0.43)    | 2.31<br>(1.57,3.31)             | 0.23<br>(0.16,0.34) | -1.71<br>(-1.89,-1.53) | 225.05<br>(166.07,292.44)            | 33.16<br>(23.95,43.82)  | 0.02<br>(-0.06,0.1)   |
| <b>Marshall Islands</b>                     | 2.65<br>(2.29,3.10)                | 4.63<br>(4.04,5.34)    | 0.29<br>(0.28,0.31)    | 0.08<br>(0.04,0.12)             | 0.25<br>(0.12,0.40) | 1.16<br>(1.05,1.27)    | 8.60<br>(6.14,11.60)                 | 18.41<br>(13.17,24.33)  | 0.55<br>(0.5,0.61)    |
| <b>Mauritania</b>                           | 151.24<br>(131.62,173.78)          | 5.50<br>(4.78,6.30)    | 0.84<br>(0.83,0.85)    | 4.28<br>(2.46,6.59)             | 0.24<br>(0.14,0.36) | -0.21<br>(-0.28,-0.14) | 357.64<br>(259.37,472.75)            | 15.03<br>(10.98,19.74)  | 0.52<br>(0.44,0.6)    |
| <b>Mauritius</b>                            | 116.19<br>(100.10,133.75)          | 7.33<br>(6.39,8.54)    | 0.6<br>(0.56,0.63)     | 4.20<br>(1.93,5.84)             | 0.27<br>(0.12,0.37) | 5.78<br>(3.87,7.73)    | 384.61<br>(275.26,510.67)            | 22.84<br>(16.42,30.27)  | 1.14<br>(0.84,1.43)   |
| <b>Mexico</b>                               | 32,458.59<br>(29,222.02,35,828.11) | 25.43<br>(22.94,28.02) | -0.26<br>(-0.35,-0.18) | 1,541.94<br>(1,014.93,2,189.93) | 1.40<br>(0.92,1.96) | -1.32<br>(-1.42,-1.22) | 102,187.70<br>(78,727.27,130,521.66) | 83.46<br>(64.55,106.40) | -0.49<br>(-0.58,-0.4) |
| <b>Micronesia<br/>(Federated States of)</b> | 4.94<br>(4.27,5.73)                | 4.77<br>(4.14,5.49)    | 0.51<br>(0.47,0.54)    | 0.13<br>(0.07,0.19)             | 0.21<br>(0.10,0.31) | 1.11<br>(1.06,1.16)    | 16.08<br>(11.58,21.36)               | 18.15<br>(13.08,23.90)  | 0.65<br>(0.62,0.69)   |
| <b>Monaco</b>                               | 4.15<br>(3.57,4.76)                | 9.44<br>(8.13,10.90)   | 0.36<br>(0.32,0.4)     | 0.08<br>(0.06,0.12)             | 0.08<br>(0.06,0.12) | 0.12<br>(0.01,0.22)    | 15.32<br>(10.82,20.71)               | 26.71<br>(18.61,36.35)  | 0.32<br>(0.27,0.37)   |
| <b>Mongolia</b>                             | 334.43<br>(286.30,389.14)          | 9.49<br>(8.26,10.82)   | 0.92<br>(0.87,0.96)    | 7.95<br>(5.70,11.66)            | 0.43<br>(0.32,0.57) | 0.4<br>(0.21,0.59)     | 1,041.19<br>(760.72,1,360.27)        | 33.71<br>(25.08,43.46)  | 0.5<br>(0.46,0.55)    |
| <b>Montenegro</b>                           | 60.04<br>(52.35,68.64)             | 8.18<br>(7.11,9.39)    | 0.59<br>(0.53,0.65)    | 1.86<br>(1.44,2.33)             | 0.20<br>(0.16,0.25) | 0.88<br>(0.45,1.31)    | 208.52<br>(151.49,276.38)            | 24.52<br>(17.70,32.49)  | 0.51<br>(0.45,0.58)   |
| <b>Morocco</b>                              | 1,716.67<br>(1,474.85,2,012.85)    | 4.51<br>(3.88,5.28)    | 0.93<br>(0.88,0.99)    | 33.08<br>(17.98,55.26)          | 0.12<br>(0.06,0.20) | 1.35<br>(1.21,1.48)    | 5,255.43<br>(3,658.33,7,094.18)      | 14.57<br>(10.15,19.53)  | 0.98<br>(0.94,1.02)   |
| <b>Mozambique</b>                           | 2,854.27<br>(2,554.24,3,219.68)    | 17.74<br>(15.91,19.78) | 0.72<br>(0.69,0.75)    | 53.98<br>(27.10,85.24)          | 0.64<br>(0.29,1.01) | 0.05<br>(-0.07,0.16)   | 5,977.33<br>(4,359.90,8,001.94)      | 46.82<br>(34.26,62.25)  | 0.55<br>(0.52,0.59)   |

|                                 |                                    |                        |                       |                             |                     |                        |                                    |                        |                        |
|---------------------------------|------------------------------------|------------------------|-----------------------|-----------------------------|---------------------|------------------------|------------------------------------|------------------------|------------------------|
| <b>Myanmar</b>                  | 3,501.82<br>(3,094.85,3,992.17)    | 6.21<br>(5.52,7.05)    | 0.73<br>(0.7,0.77)    | 81.62<br>(54.70,109.47)     | 0.20<br>(0.14,0.26) | 0.8<br>(0.74,0.86)     | 10,121.13<br>(7,412.23,13,404.98)  | 19.45<br>(14.33,25.34) | 0.65<br>(0.62,0.69)    |
| <b>Namibia</b>                  | 342.96<br>(304.90,387.36)          | 17.16<br>(15.28,19.13) | 0.8<br>(0.74,0.86)    | 10.03<br>(6.26,14.74)       | 0.79<br>(0.48,1.14) | 0<br>(-0.17,0.16)      | 913.98<br>(666.44,1,192.97)        | 55.70<br>(41.29,72.16) | 0.46<br>(0.35,0.58)    |
| <b>Nauru</b>                    | 0.46<br>(0.39,0.55)                | 4.49<br>(3.87,5.20)    | 0.33<br>(0.28,0.38)   | 0.01<br>(0.00,0.01)         | 0.23<br>(0.11,0.34) | 1.24<br>(1,1.49)       | 1.30<br>(0.90,1.75)                | 18.15<br>(12.92,23.90) | 0.63<br>(0.56,0.7)     |
| <b>Nepal</b>                    | 5,413.42<br>(4,853.20,6,030.93)    | 20.53<br>(18.53,22.75) | 1.27<br>(1.24,1.3)    | 196.16<br>(125.58,300.12)   | 1.12<br>(0.74,1.70) | 0.69<br>(0.65,0.73)    | 13,262.58<br>(9,826.64,17,544.29)  | 56.57<br>(42.06,74.63) | 1.06<br>(1.03,1.1)     |
| <b>Netherlands</b>              | 5,101.44<br>(4,580.37,5,703.07)    | 20.67<br>(18.57,23.21) | -0.09<br>(-0.25,0.07) | 210.10<br>(155.64,339.14)   | 0.56<br>(0.42,0.92) | -2.85<br>(-3.05,-2.64) | 15,109.76<br>(11,005.05,19,723.21) | 53.09<br>(38.36,69.29) | -0.83<br>(-1.04,-0.63) |
| <b>New Zealand</b>              | 1,359.83<br>(1,205.61,1,515.41)    | 22.59<br>(20.14,25.12) | -0.13<br>(-0.2,-0.06) | 59.30<br>(42.91,86.56)      | 0.71<br>(0.52,1.04) | -1.52<br>(-1.9,-1.13)  | 4,086.41<br>(3,057.20,5,264.19)    | 59.10<br>(43.89,76.36) | -0.49<br>(-0.6,-0.38)  |
| <b>Nicaragua</b>                | 940.81<br>(825.89,1,070.61)        | 15.36<br>(13.61,17.28) | 1.01<br>(0.91,1.1)    | 28.28<br>(21.73,48.57)      | 0.83<br>(0.64,1.33) | 0.08<br>(-0.63,0.8)    | 2,665.92<br>(1,939.52,3,469.55)    | 51.09<br>(37.81,66.35) | 0.51<br>(0.27,0.74)    |
| <b>Niger</b>                    | 547.25<br>(474.00,636.40)          | 4.57<br>(4.00,5.22)    | 0.5<br>(0.48,0.52)    | 13.39<br>(7.79,21.22)       | 0.22<br>(0.13,0.35) | 0.79<br>(0.66,0.93)    | 1,236.28<br>(887.43,1,624.87)      | 12.85<br>(9.30,16.71)  | 0.62<br>(0.59,0.65)    |
| <b>Nigeria</b>                  | 5,884.01<br>(5,262.25,6,600.64)    | 4.35<br>(3.88,4.86)    | 0.66<br>(0.52,0.79)   | 172.57<br>(91.19,273.10)    | 0.24<br>(0.13,0.37) | 1.3<br>(1.19,1.42)     | 14,228.00<br>(10,025.74,18,795.52) | 13.17<br>(9.29,17.26)  | 1.02<br>(0.91,1.13)    |
| <b>Niue</b>                     | 0.08<br>(0.07,0.10)                | 4.99<br>(4.29,5.77)    | 0.59<br>(0.5,0.68)    | 0.00<br>(0.00,0.01)         | 0.16<br>(0.07,0.24) | 0.7<br>(0.57,0.83)     | 0.34<br>(0.24,0.45)                | 17.62<br>(12.42,23.29) | 0.58<br>(0.52,0.64)    |
| <b>North Macedonia</b>          | 180.69<br>(155.27,208.44)          | 7.03<br>(6.06,8.13)    | 0.79<br>(0.71,0.87)   | 2.82<br>(1.67,3.94)         | 0.10<br>(0.06,0.14) | 3.18<br>(2.82,3.54)    | 578.08<br>(399.02,784.19)          | 19.80<br>(13.61,26.88) | 0.9<br>(0.82,0.97)     |
| <b>Northern Mariana Islands</b> | 2.39<br>(2.02,2.78)                | 5.06<br>(4.35,5.89)    | 0.3<br>(0.15,0.46)    | 0.07<br>(0.05,0.10)         | 0.16<br>(0.11,0.21) | 3.47<br>(3.15,3.79)    | 9.61<br>(6.90,12.69)               | 17.72<br>(12.74,23.48) | 0.77<br>(0.64,0.9)     |
| <b>Norway</b>                   | 1,612.23<br>(1,430.30,1,802.15)    | 21.74<br>(19.41,24.23) | -0.09<br>(-0.2,0.01)  | 60.08<br>(42.84,90.42)      | 0.57<br>(0.42,0.87) | -3.17<br>(-3.53,-2.81) | 4,446.19<br>(3,322.88,5,758.28)    | 52.58<br>(39.10,67.95) | -0.97<br>(-1.11,-0.83) |
| <b>Oman</b>                     | 239.28<br>(199.05,295.05)          | 4.67<br>(4.00,5.43)    | 1.09<br>(0.97,1.2)    | 1.10<br>(0.67,1.60)         | 0.08<br>(0.05,0.12) | -0.28<br>(-0.53,-0.02) | 558.81<br>(375.81,762.22)          | 14.27<br>(10.02,18.73) | 0.85<br>(0.71,0.99)    |
| <b>Pakistan</b>                 | 31,583.03<br>(28,655.64,34,669.13) | 20.36<br>(18.41,22.55) | 0.05<br>(0,0.1)       | 992.40<br>(752.99,1,284.27) | 1.28<br>(0.99,1.65) | 0.75<br>(0.71,0.79)    | 75,356.40<br>(56,476.74,95,051.11) | 60.29<br>(46.51,74.91) | 0.28<br>(0.24,0.33)    |
| <b>Palau</b>                    | 0.93<br>(0.79,1.08)                | 4.58<br>(3.90,5.33)    | 0.29<br>(0.24,0.34)   | 0.02<br>(0.01,0.03)         | 0.12<br>(0.07,0.17) | 0.13<br>(0.05,0.22)    | 3.55<br>(2.49,4.71)                | 15.64<br>(11.15,20.70) | 0.28<br>(0.24,0.32)    |
| <b>Palestine</b>                | 222.44<br>(189.79,263.89)          | 4.97<br>(4.30,5.72)    | 0.7<br>(0.66,0.73)    | 3.67<br>(1.45,5.25)         | 0.19<br>(0.07,0.27) | 1.04<br>(0.64,1.43)    | 565.74<br>(395.98,755.48)          | 16.80<br>(11.89,22.08) | 0.64<br>(0.54,0.73)    |
| <b>Panama</b>                   | 604.72<br>(536.96,684.08)          | 14.33<br>(12.74,16.24) | 0.72<br>(0.65,0.79)   | 13.28<br>(9.03,23.99)       | 0.31<br>(0.21,0.56) | -1.24<br>(-1.51,-0.97) | 1,718.15<br>(1,210.72,2,283.39)    | 40.96<br>(28.83,54.40) | 0.31<br>(0.18,0.44)    |
| <b>Papua New Guinea</b>         | 352.84<br>(301.82,415.10)          | 3.76<br>(3.26,4.34)    | 0.23<br>(0.22,0.25)   | 5.19<br>(2.85,8.26)         | 0.12<br>(0.07,0.19) | 1.14<br>(1.04,1.24)    | 972.45<br>(672.21,1,326.72)        | 13.24<br>(9.38,17.94)  | 0.4<br>(0.36,0.45)     |
| <b>Paraguay</b>                 | 952.78<br>(825.74,1,093.21)        | 13.50<br>(11.78,15.29) | 1.19<br>(1.16,1.22)   | 37.99<br>(10.95,57.65)      | 0.69<br>(0.20,1.04) | 8.25<br>(7.47,9.03)    | 3,332.59<br>(2,257.17,4,493.62)    | 53.20<br>(35.53,71.86) | 2.27<br>(2.15,2.4)     |
| <b>Peru</b>                     | 4,594.20                           | 13.29                  | 1.41                  | 118.34                      | 0.36                | -1.07                  | 13,150.29                          | 39.09                  | 1.03                   |

|                                         |                                    |                        |                        |                             |                     |                        |                                    |                        |                        |
|-----------------------------------------|------------------------------------|------------------------|------------------------|-----------------------------|---------------------|------------------------|------------------------------------|------------------------|------------------------|
|                                         | (4,032.14,5,279.23)                | (11.71,15.23)          | (1.36,1.46)            | (67.66,164.02)              | (0.21,0.50)         | (-2,-0.14)             | (9,550.24,17,342.48)               | (28.58,51.40)          | (0.77,1.28)            |
| <b>Philippines</b>                      | 6,047.81<br>(5,412.08,6,783.69)    | 5.57<br>(4.98,6.22)    | -0.14<br>(-0.17,-0.11) | 159.68<br>(76.92,269.06)    | 0.24<br>(0.11,0.40) | 1.26<br>(0.92,1.61)    | 18,267.48<br>(13,166.80,23,930.73) | 19.50<br>(14.04,25.65) | 0.28<br>(0.17,0.39)    |
| <b>Poland</b>                           | 7,812.82<br>(6,941.69,8,685.49)    | 16.02<br>(14.29,17.76) | -0.74<br>(-0.98,-0.49) | 332.44<br>(245.82,559.82)   | 0.47<br>(0.35,0.78) | -2.63<br>(-2.78,-2.48) | 28,807.97<br>(21,422.70,37,160.94) | 47.87<br>(35.55,62.10) | -1.25<br>(-1.47,-1.02) |
| <b>Portugal</b>                         | 1,642.17<br>(1,471.54,1,821.27)    | 12.45<br>(11.15,13.83) | 0.79<br>(0.74,0.84)    | 99.66<br>(73.41,191.00)     | 0.38<br>(0.29,0.69) | -1.36<br>(-1.98,-0.73) | 6,657.16<br>(4,914.86,8,594.53)    | 38.59<br>(27.73,50.62) | 0.18<br>(0.04,0.32)    |
| <b>Puerto Rico</b>                      | 560.27<br>(490.10,635.19)          | 14.03<br>(12.26,16.29) | 0.96<br>(0.92,0.99)    | 28.91<br>(18.74,43.97)      | 0.36<br>(0.22,0.52) | -0.25<br>(-0.55,0.04)  | 2,272.63<br>(1,656.89,3,029.63)    | 44.30<br>(31.71,59.55) | 0.92<br>(0.83,1.01)    |
| <b>Qatar</b>                            | 185.46<br>(151.17,232.81)          | 5.30<br>(4.54,6.18)    | 1.01<br>(0.96,1.07)    | 0.41<br>(0.25,0.60)         | 0.09<br>(0.05,0.12) | 0.21<br>(-0.47,0.89)   | 421.00<br>(280.24,592.09)          | 15.13<br>(10.57,20.56) | 0.79<br>(0.71,0.87)    |
| <b>Republic of Korea</b>                | 10,055.35<br>(9,082.60,11,054.86)  | 13.43<br>(12.25,14.69) | 0.84<br>(0.77,0.92)    | 220.66<br>(155.79,332.36)   | 0.25<br>(0.17,0.38) | -2.88<br>(-3.13,-2.63) | 29,201.43<br>(21,353.61,38,703.71) | 35.24<br>(25.66,46.69) | -0.01<br>(-0.07,0.05)  |
| <b>Republic of Moldova</b>              | 261.08<br>(226.18,299.86)          | 6.18<br>(5.38,7.10)    | 0.66<br>(0.52,0.8)     | 9.69<br>(5.86,12.57)        | 0.17<br>(0.10,0.22) | 2.37<br>(0.68,4.1)     | 1,079.07<br>(793.32,1,437.37)      | 21.22<br>(15.48,28.39) | 0.98<br>(0.82,1.13)    |
| <b>Romania</b>                          | 1,691.01<br>(1,440.03,1,943.30)    | 7.43<br>(6.42,8.57)    | 0.83<br>(0.8,0.86)     | 45.16<br>(21.56,60.82)      | 0.11<br>(0.06,0.15) | 4.11<br>(3.82,4.4)     | 6,096.94<br>(4,302.96,8,150.14)    | 21.26<br>(14.82,28.63) | 1.04<br>(0.98,1.09)    |
| <b>Russian Federation</b>               | 13,116.74<br>(11,729.12,14,661.07) | 8.11<br>(7.29,9.05)    | 0.14<br>(0.11,0.17)    | 779.23<br>(503.57,1,066.28) | 0.34<br>(0.22,0.47) | -0.76<br>(-1.52,0.02)  | 64,908.83<br>(49,771.11,82,234.59) | 31.92<br>(24.32,40.66) | -0.19<br>(-0.5,0.12)   |
| <b>Rwanda</b>                           | 1,589.45<br>(1,416.48,1,788.81)    | 18.91<br>(16.83,21.03) | 0.95<br>(0.86,1.04)    | 24.05<br>(10.45,36.89)      | 0.53<br>(0.21,0.80) | -1.05<br>(-1.26,-0.84) | 3,288.02<br>(2,393.56,4,424.79)    | 47.21<br>(34.71,62.69) | 0.36<br>(0.23,0.49)    |
| <b>Saint Kitts and Nevis</b>            | 8.42<br>(7.36,9.57)                | 12.38<br>(10.89,14.18) | 0.67<br>(0.64,0.71)    | 0.27<br>(0.16,0.47)         | 0.55<br>(0.33,0.96) | -0.58<br>(-1.15,-0.02) | 28.75<br>(20.45,38.32)             | 41.34<br>(29.76,54.68) | 0.27<br>(0.2,0.35)     |
| <b>Saint Lucia</b>                      | 25.44<br>(22.70,28.47)             | 12.73<br>(11.39,14.31) | 0.76<br>(0.73,0.78)    | 1.19<br>(0.80,1.73)         | 0.61<br>(0.40,0.87) | -0.63<br>(-0.94,-0.33) | 82.13<br>(60.56,106.87)            | 39.13<br>(28.92,50.91) | 0.33<br>(0.27,0.39)    |
| <b>Saint Vincent and the Grenadines</b> | 10.20<br>(8.91,11.74)              | 8.41<br>(7.35,9.70)    | 0.64<br>(0.59,0.7)     | 0.32<br>(0.22,0.46)         | 0.28<br>(0.19,0.40) | -0.67<br>(-0.96,-0.37) | 33.49<br>(24.32,44.57)             | 26.09<br>(18.69,34.61) | 0.36<br>(0.24,0.49)    |
| <b>Samoa</b>                            | 9.60<br>(8.27,11.30)               | 4.74<br>(4.10,5.49)    | 0.31<br>(0.26,0.35)    | 0.23<br>(0.11,0.33)         | 0.17<br>(0.08,0.24) | 1.11<br>(1.03,1.19)    | 29.17<br>(20.87,38.94)             | 16.91<br>(12.21,22.40) | 0.41<br>(0.36,0.47)    |
| <b>San Marino</b>                       | 4.79<br>(3.98,5.68)                | 11.87<br>(9.95,13.98)  | 0.43<br>(0.34,0.53)    | 0.04<br>(0.02,0.07)         | 0.06<br>(0.03,0.09) | -0.09<br>(-0.22,0.05)  | 14.03<br>(9.47,19.49)              | 30.35<br>(20.33,42.18) | 0.41<br>(0.36,0.46)    |
| <b>Sao Tome and Principe</b>            | 7.37<br>(6.31,8.66)                | 4.88<br>(4.21,5.63)    | 0.71<br>(0.69,0.74)    | 0.20<br>(0.11,0.31)         | 0.23<br>(0.13,0.36) | 1.4<br>(1.22,1.58)     | 17.59<br>(12.31,23.39)             | 14.00<br>(9.96,18.46)  | 0.91<br>(0.83,0.99)    |
| <b>Saudi Arabia</b>                     | 2,110.70<br>(1,757.22,2,574.51)    | 4.97<br>(4.21,5.84)    | 1.23<br>(1.2,1.26)     | 6.85<br>(4.77,10.26)        | 0.05<br>(0.03,0.07) | -0.68<br>(-0.87,-0.48) | 5,140.01<br>(3,389.13,7,174.91)    | 14.20<br>(9.73,19.47)  | 1.07<br>(1.1,1.14)     |
| <b>Senegal</b>                          | 492.21<br>(429.25,573.18)          | 4.84<br>(4.26,5.57)    | 0.47<br>(0.45,0.48)    | 14.42<br>(8.89,20.56)       | 0.23<br>(0.14,0.33) | 0.92<br>(0.53,1.32)    | 1,170.02<br>(849.23,1,550.04)      | 13.49<br>(10.04,17.71) | 0.62<br>(0.48,0.76)    |
| <b>Serbia</b>                           | 928.49<br>(817.32,1,040.32)        | 9.05<br>(7.94,10.27)   | 1.39<br>(1.19,1.58)    | 40.55<br>(27.65,58.54)      | 0.26<br>(0.17,0.36) | 0.47<br>(-0.03,0.96)   | 3,629.40<br>(2,643.23,4,748.82)    | 27.89<br>(20.02,36.88) | 1.16<br>(0.91,1.41)    |
| <b>Seychelles</b>                       | 5.21<br>(4.41,6.13)                | 4.53<br>(3.87,5.28)    | 0.46<br>(0.41,0.51)    | 0.09<br>(0.05,0.12)         | 0.09<br>(0.05,0.13) | 1.29<br>(1.1,1.48)     | 16.32<br>(11.40,21.68)             | 13.85<br>(9.68,18.26)  | 0.5<br>(0.42,0.58)     |



|                                       |                                   |                        |                        |                           |                     |                        |                                    |                        |                        |
|---------------------------------------|-----------------------------------|------------------------|------------------------|---------------------------|---------------------|------------------------|------------------------------------|------------------------|------------------------|
| <b>Sierra Leone</b>                   | 241.98<br>(209.05,284.11)         | 4.58<br>(3.95,5.24)    | 0.46<br>(0.43,0.5)     | 6.86<br>(3.80,11.35)      | 0.22<br>(0.12,0.36) | 0.94<br>(0.77,1.1)     | 573.85<br>(409.17,776.49)          | 12.91<br>(9.24,17.09)  | 0.66<br>(0.6,0.72)     |
| <b>Singapore</b>                      | 598.57<br>(505.35,696.86)         | 8.37<br>(7.14,9.67)    | 0.73<br>(0.66,0.79)    | 9.93<br>(6.53,21.28)      | 0.14<br>(0.09,0.29) | -0.84<br>(-1.67,0.01)  | 1,822.77<br>(1,250.27,2,461.38)    | 23.34<br>(15.90,31.49) | 0.46<br>(0.35,0.58)    |
| <b>Slovakia</b>                       | 472.56<br>(405.58,541.88)         | 7.36<br>(6.36,8.42)    | 0.71<br>(0.65,0.77)    | 14.16<br>(5.86,20.50)     | 0.15<br>(0.06,0.22) | 3.06<br>(1.9,4.24)     | 1,751.76<br>(1,231.01,2,339.41)    | 22.40<br>(15.67,30.09) | 0.92<br>(0.8,1.03)     |
| <b>Slovenia</b>                       | 434.42<br>(384.31,488.23)         | 15.60<br>(13.92,17.70) | 0.84<br>(0.81,0.87)    | 22.20<br>(10.85,31.83)    | 0.47<br>(0.24,0.68) | -0.35<br>(-0.77,0.08)  | 1,601.72<br>(1,159.21,2,086.96)    | 45.26<br>(32.46,59.51) | 0.47<br>(0.37,0.57)    |
| <b>Solomon Islands</b>                | 30.64<br>(26.62,35.67)            | 4.94<br>(4.34,5.67)    | 0.4<br>(0.35,0.45)     | 0.58<br>(0.33,0.88)       | 0.20<br>(0.11,0.30) | 1.28<br>(1.08,1.47)    | 88.90<br>(62.39,116.23)            | 18.90<br>(13.53,24.77) | 0.62<br>(0.51,0.73)    |
| <b>Somalia</b>                        | 2,126.29<br>(1,872.13,2,399.80)   | 20.45<br>(18.17,22.99) | 0.19<br>(0.11,0.27)    | 31.09<br>(13.32,54.23)    | 0.62<br>(0.23,1.07) | -0.57<br>(-0.65,-0.49) | 4,161.64<br>(3,008.49,5,605.48)    | 52.02<br>(37.56,69.42) | -0.07<br>(-0.11,-0.03) |
| <b>South Africa</b>                   | 11,128.81<br>(9,972.46,12,452.26) | 19.29<br>(17.25,21.47) | -0.15<br>(-0.23,-0.08) | 302.12<br>(253.00,436.62) | 0.75<br>(0.62,1.09) | -1.32<br>(-1.97,-0.67) | 31,797.94<br>(24,071.39,40,803.82) | 62.02<br>(47.30,79.03) | -0.78<br>(-0.99,-0.57) |
| <b>South Sudan</b>                    | 933.46<br>(826.74,1,062.23)       | 16.20<br>(14.50,18.15) | 0.22<br>(0.17,0.28)    | 13.05<br>(6.65,21.33)     | 0.44<br>(0.21,0.69) | -0.87<br>(-0.96,-0.78) | 1,819.23<br>(1,307.03,2,437.99)    | 39.85<br>(29.02,53.20) | -0.03<br>(-0.07,0.01)  |
| <b>Spain</b>                          | 8,040.13<br>(7,400.16,8,692.74)   | 12.88<br>(11.94,13.96) | 0.47<br>(0.45,0.49)    | 346.50<br>(260.12,583.06) | 0.33<br>(0.25,0.56) | -0.06<br>(-0.35,0.23)  | 26,429.36<br>(19,443.98,34,236.00) | 35.66<br>(25.94,46.46) | 0.22<br>(0.16,0.28)    |
| <b>Sri Lanka</b>                      | 1,135.50<br>(978.62,1,321.53)     | 4.76<br>(4.09,5.53)    | 0.56<br>(0.52,0.6)     | 19.37<br>(11.86,29.20)    | 0.08<br>(0.05,0.12) | -0.29<br>(-0.66,0.07)  | 3,575.08<br>(2,485.91,4,824.26)    | 14.23<br>(9.85,19.29)  | 0.46<br>(0.39,0.53)    |
| <b>Sudan</b>                          | 1,542.06<br>(1,316.83,1,828.55)   | 4.20<br>(3.63,4.84)    | 0.95<br>(0.92,0.98)    | 17.07<br>(9.33,26.88)     | 0.10<br>(0.05,0.15) | 0.87<br>(0.81,0.94)    | 3,752.20<br>(2,636.69,5,137.59)    | 13.36<br>(9.63,17.86)  | 0.91<br>(0.85,0.96)    |
| <b>Suriname</b>                       | 45.68<br>(39.38,53.37)            | 7.68<br>(6.65,8.95)    | 0.77<br>(0.73,0.81)    | 1.15<br>(0.81,1.52)       | 0.22<br>(0.15,0.29) | -0.23<br>(-0.95,0.5)   | 143.65<br>(101.58,189.72)          | 23.55<br>(16.80,31.29) | 0.62<br>(0.46,0.78)    |
| <b>Sweden</b>                         | 3,078.64<br>(2,827.88,3,345.28)   | 21.39<br>(19.69,23.28) | 0.12<br>(0.09,0.16)    | 138.14<br>(89.90,186.53)  | 0.56<br>(0.37,0.76) | -1.63<br>(-1.82,-1.43) | 9,022.54<br>(6,739.65,11,727.26)   | 54.00<br>(39.44,70.86) | -0.29<br>(-0.36,-0.23) |
| <b>Switzerland</b>                    | 2,139.16<br>(1,921.36,2,405.87)   | 17.69<br>(15.72,20.01) | 0.25<br>(0.21,0.3)     | 71.04<br>(36.67,92.42)    | 0.35<br>(0.19,0.44) | -2.03<br>(-2.27,-1.8)  | 6,198.40<br>(4,443.48,8,128.62)    | 44.12<br>(30.96,58.72) | -0.16<br>(-0.26,-0.07) |
| <b>Syrian Arab Republic</b>           | 740.77<br>(628.40,870.74)         | 5.00<br>(4.25,5.87)    | 0.99<br>(0.94,1.05)    | 7.67<br>(4.80,10.59)      | 0.07<br>(0.05,0.10) | 0.28<br>(0.04,0.54)    | 2,072.97<br>(1,415.87,2,802.05)    | 14.66<br>(10.10,19.72) | 0.81<br>(0.72,0.9)     |
| <b>Taiwan<br/>(Province of China)</b> | 3,458.53<br>(3,409.85,3,507.94)   | 10.44<br>(10.23,10.70) | 0.11<br>(0.09,0.12)    | 126.76<br>(69.38,175.79)  | 0.32<br>(0.18,0.45) | -2.08<br>(-2.47,-1.69) | 11,228.73<br>(8,060.59,14,545.18)  | 30.54<br>(21.85,39.73) | -0.45<br>(-0.56,-0.33) |
| <b>Tajikistan</b>                     | 962.36<br>(838.03,1,117.40)       | 11.44<br>(10.07,13.08) | 0.58<br>(0.55,0.61)    | 26.74<br>(18.83,34.50)    | 0.65<br>(0.47,0.83) | 1.66<br>(1.04,2.28)    | 2,868.70<br>(2,143.08,3,704.60)    | 41.71<br>(31.81,52.75) | 0.73<br>(0.64,0.82)    |
| <b>Thailand</b>                       | 9,036.42<br>(7,840.59,10,378.62)  | 9.60<br>(8.37,10.98)   | 0.42<br>(0.34,0.49)    | 204.75<br>(141.36,316.59) | 0.21<br>(0.14,0.32) | -0.95<br>(-1.23,-0.67) | 27,535.92<br>(19,786.65,36,593.80) | 27.78<br>(19.93,36.94) | 0.09<br>(-0.01,0.19)   |
| <b>Timor-Leste</b>                    | 53.22<br>(46.11,61.57)            | 4.83<br>(4.22,5.52)    | 0.58<br>(0.56,0.6)     | 1.44<br>(0.86,1.97)       | 0.20<br>(0.12,0.27) | 1.53<br>(1.45,1.61)    | 150.50<br>(107.78,199.44)          | 15.92<br>(11.60,20.97) | 0.73<br>(0.66,0.8)     |
| <b>Togo</b>                           | 249.84<br>(212.86,292.97)         | 4.57<br>(3.95,5.23)    | 0.36<br>(0.33,0.39)    | 6.98<br>(3.78,10.76)      | 0.25<br>(0.14,0.39) | 0.94<br>(0.72,1.15)    | 600.36<br>(428.87,795.44)          | 13.62<br>(9.85,17.84)  | 0.57<br>(0.5,0.64)     |
| <b>Tokelau</b>                        | 0.06                              | 4.29                   | 0.58                   | 0.00                      | 0.16                | 0.36                   | 0.21                               | 15.67                  | 0.46                   |



|                                               |                                     |                        |                        |                                 |                     |                        |                                       |                        |                        |
|-----------------------------------------------|-------------------------------------|------------------------|------------------------|---------------------------------|---------------------|------------------------|---------------------------------------|------------------------|------------------------|
|                                               | (0.05,0.07)                         | (3.68,4.98)            | (0.49,0.67)            | (0.00,0.00)                     | (0.07,0.24)         | (0.22,0.5)             | (0.15,0.28)                           | (11.04,20.75)          | (0.36,0.56)            |
| <b>Tonga</b>                                  | 4.25<br>(3.63,4.97)                 | 4.41<br>(3.79,5.14)    | 0.31<br>(0.26,0.37)    | 0.13<br>(0.06,0.18)             | 0.16<br>(0.08,0.24) | 1.05<br>(0.84,1.27)    | 13.90<br>(9.80,18.41)                 | 16.13<br>(11.41,21.41) | 0.44<br>(0.35,0.54)    |
| <b>Trinidad and Tobago</b>                    | 232.28<br>(207.65,259.38)           | 14.68<br>(13.18,16.48) | 0.61<br>(0.55,0.68)    | 12.88<br>(9.02,23.38)           | 0.74<br>(0.52,1.34) | -0.62<br>(-1.21,-0.03) | 834.02<br>(611.83,1,122.78)           | 47.75<br>(35.05,64.08) | 0.28<br>(-0.01,0.56)   |
| <b>Tunisia</b>                                | 633.12<br>(540.94,736.87)           | 5.01<br>(4.26,5.83)    | 0.99<br>(0.98,1)       | 9.15<br>(5.27,13.90)            | 0.08<br>(0.04,0.12) | 1.31<br>(1.19,1.43)    | 1,992.61<br>(1,377.64,2,743.35)       | 15.17<br>(10.45,20.77) | 1<br>(0.95,1.06)       |
| <b>Turkey</b>                                 | 10,701.48<br>(9,656.16,11,830.76)   | 11.35<br>(10.27,12.51) | 1.25<br>(1.19,1.31)    | 259.61<br>(188.07,397.68)       | 0.31<br>(0.22,0.47) | -1.17<br>(-1.39,-0.95) | 32,813.13<br>(24,231.49,42,623.65)    | 35.42<br>(26.20,45.94) | 0.53<br>(0.42,0.63)    |
| <b>Turkmenistan</b>                           | 355.44<br>(307.91,409.23)           | 6.91<br>(6.03,7.90)    | 0.81<br>(0.73,0.89)    | 4.61<br>(2.01,6.78)             | 0.13<br>(0.05,0.20) | 2.71<br>(2.43,2.99)    | 1,016.36<br>(710.74,1,373.41)         | 21.38<br>(14.99,28.82) | 0.98<br>(0.91,1.05)    |
| <b>Tuvalu</b>                                 | 0.49<br>(0.42,0.57)                 | 4.07<br>(3.49,4.76)    | 0.33<br>(0.31,0.35)    | 0.02<br>(0.01,0.03)             | 0.18<br>(0.08,0.28) | 0.33<br>(0.24,0.43)    | 1.74<br>(1.22,2.30)                   | 15.62<br>(10.93,20.58) | 0.29<br>(0.23,0.35)    |
| <b>Uganda</b>                                 | 3,461.26<br>(3,090.53,3,935.07)     | 16.15<br>(14.48,17.99) | 0.61<br>(0.57,0.65)    | 58.13<br>(26.97,87.09)          | 0.53<br>(0.22,0.78) | -0.11<br>(-0.26,0.05)  | 7,000.40<br>(5,079.48,9,242.47)       | 41.58<br>(30.65,54.81) | 0.44<br>(0.39,0.49)    |
| <b>Ukraine</b>                                | 2,690.67<br>(2,382.26,3,045.73)     | 5.42<br>(4.82,6.12)    | 0.19<br>(0.08,0.3)     | 124.15<br>(39.52,182.05)        | 0.17<br>(0.05,0.24) | 4.16<br>(3.73,4.59)    | 12,064.79<br>(8,516.27,15,995.49)     | 19.19<br>(13.68,25.45) | 0.68<br>(0.55,0.82)    |
| <b>United Arab Emirates</b>                   | 571.31<br>(454.79,718.26)           | 4.80<br>(4.13,5.57)    | 0.88<br>(0.8,0.97)     | 3.02<br>(1.66,4.86)             | 0.08<br>(0.04,0.16) | 0.14<br>(-0.75,1.04)   | 1,484.46<br>(973.38,2,033.56)         | 14.00<br>(9.62,18.47)  | 0.69<br>(0.57,0.82)    |
| <b>United Kingdom</b>                         | 21,100.59<br>(19,158.98,23,236.40)  | 23.59<br>(21.45,25.87) | -0.28<br>(-0.36,-0.21) | 1,054.73<br>(711.96,1,425.87)   | 0.76<br>(0.53,1.04) | -2.38<br>(-2.64,-2.12) | 66,660.84<br>(50,538.39,85,074.24)    | 64.09<br>(47.93,82.25) | -0.89<br>(-0.97,-0.81) |
| <b>United Republic of Tanzania</b>            | 6,168.85<br>(5,480.81,6,962.70)     | 17.86<br>(15.93,19.93) | 0.57<br>(0.53,0.6)     | 108.33<br>(48.39,169.66)        | 0.54<br>(0.22,0.84) | -0.48<br>(-0.61,-0.34) | 12,887.90<br>(9,427.85,17,052.05)     | 45.77<br>(33.52,60.97) | 0.33<br>(0.23,0.43)    |
| <b>United States of America</b>               | 92,847.57<br>(85,088.22,101,348.49) | 21.32<br>(19.78,23.12) | 0.55<br>(0.52,0.58)    | 3,060.68<br>(2,296.60,4,685.29) | 0.52<br>(0.40,0.80) | 0.04<br>(-0.19,0.27)   | 257,883.56<br>(192,869.73,328,514.77) | 53.50<br>(39.55,68.35) | 0.39<br>(0.36,0.43)    |
| <b>United States Virgin Islands</b>           | 11.86<br>(10.30,13.60)              | 10.37<br>(8.94,12.09)  | 0.78<br>(0.76,0.8)     | 0.50<br>(0.32,0.70)             | 0.34<br>(0.22,0.48) | 0.01<br>(-0.22,0.25)   | 45.24<br>(32.24,59.83)                | 32.36<br>(22.91,43.24) | 0.65<br>(0.58,0.72)    |
| <b>Uruguay</b>                                | 508.53<br>(455.13,570.99)           | 12.72<br>(11.26,14.47) | 0.79<br>(0.77,0.8)     | 28.74<br>(21.47,53.54)          | 0.47<br>(0.36,0.86) | -1.56<br>(-2.7,-0.41)  | 1,761.35<br>(1,282.82,2,316.15)       | 38.47<br>(27.83,50.90) | 0.54<br>(0.19,0.9)     |
| <b>Uzbekistan</b>                             | 7,167.07<br>(6,392.31,7,982.52)     | 20.49<br>(18.48,22.59) | 0.56<br>(0.48,0.63)    | 122.61<br>(90.68,195.85)        | 0.64<br>(0.48,1.07) | -1.05<br>(-1.47,-0.63) | 21,247.20<br>(15,500.48,27,503.57)    | 71.70<br>(52.79,92.37) | -0.05<br>(-0.21,0.11)  |
| <b>Vanuatu</b>                                | 11.84<br>(10.21,13.90)              | 4.30<br>(3.74,4.97)    | 0.23<br>(0.2,0.26)     | 0.27<br>(0.14,0.43)             | 0.16<br>(0.08,0.26) | 1.39<br>(1.2,1.58)     | 34.74<br>(24.34,46.54)                | 15.52<br>(10.97,20.43) | 0.5<br>(0.44,0.56)     |
| <b>Venezuela<br/>(Bolivarian Republic of)</b> | 6,421.17<br>(5,985.96,6,839.23)     | 21.02<br>(19.64,22.31) | 0.71<br>(0.67,0.75)    | 253.52<br>(174.38,462.33)       | 0.91<br>(0.63,1.68) | -0.62<br>(-1.29,0.05)  | 19,779.35<br>(14,606.65,25,663.17)    | 66.11<br>(48.93,86.46) | 0.3<br>(0.07,0.53)     |
| <b>Viet Nam</b>                               | 6,148.64<br>(5,286.25,7,109.69)     | 5.63<br>(4.88,6.48)    | 0.77<br>(0.75,0.79)    | 198.40<br>(114.64,290.61)       | 0.24<br>(0.14,0.36) | 1.38<br>(1.36,1.4)     | 19,649.93<br>(14,229.72,25,909.09)    | 19.12<br>(13.94,24.95) | 0.85<br>(0.81,0.9)     |
| <b>Yemen</b>                                  | 1,018.68<br>(865.48,1,211.63)       | 3.75<br>(3.23,4.37)    | 0.6<br>(0.57,0.64)     | 14.06<br>(8.10,20.29)           | 0.12<br>(0.07,0.17) | 1.2<br>(1.14,1.26)     | 2,511.47<br>(1,734.83,3,349.81)       | 12.50<br>(8.86,16.44)  | 0.7<br>(0.64,0.77)     |
| <b>Zambia</b>                                 | 2,178.95<br>(1,960.32,2,438.37)     | 20.81<br>(18.90,22.98) | 0.84<br>(0.71,0.96)    | 32.29<br>(16.14,44.78)          | 0.62<br>(0.29,0.85) | -0.39<br>(-0.59,-0.2)  | 4,236.42<br>(3,166.38,5,543.81)       | 52.99<br>(39.41,68.65) | 0.49<br>(0.36,0.61)    |

|                 |                             |                     |                       |                        |                     |                     |                                 |                        |                     |
|-----------------|-----------------------------|---------------------|-----------------------|------------------------|---------------------|---------------------|---------------------------------|------------------------|---------------------|
| <b>Zimbabwe</b> | 876.56<br>(757.12,1,025.01) | 7.18<br>(6.32,8.20) | -0.02<br>(-0.06,0.02) | 27.23<br>(16.19,41.63) | 0.41<br>(0.25,0.63) | 0.84<br>(0.61,1.08) | 2,573.66<br>(1,874.16,3,363.11) | 27.31<br>(20.17,35.56) | 0.31<br>(0.18,0.45) |
|-----------------|-----------------------------|---------------------|-----------------------|------------------------|---------------------|---------------------|---------------------------------|------------------------|---------------------|

**Table S9.** The numbers (2019), ASRs per 100,000 (2019), and AAPCs (1990-2019) in incidence and DALY for OA in 204 countries.

| Characteristic                          | Incident cases                   |                       |                  | DALYs                             |                                            |                  |
|-----------------------------------------|----------------------------------|-----------------------|------------------|-----------------------------------|--------------------------------------------|------------------|
|                                         | Numbers<br>(95% UI)              | ASIR<br>(95% UI)      | AAPC<br>(95% CI) | Numbers<br>(95% UI)               | Age-standardized DALYs<br>rate<br>(95% UI) | AAPC<br>(95% CI) |
| <b>Afghanistan</b>                      | 3,204.56(2,238.41,4,278.77)      | 391.15(346.11,441.81) | 0.26(0.25,0.27)  | 22,313.31(11,328.70,44,225.68)    | 163.91 (83.1,326.42)                       | 0.28(0.27,0.3)   |
| <b>Albania</b>                          | 954.98(683.95,1,256.49)          | 392.95(351.47,441.13) | 0.23(0.22,0.24)  | 7,230.79(3,604.27,14,298.22)      | 171.67 (85.9,339.92)                       | 0.24(0.23,0.26)  |
| <b>Algeria</b>                          | 6,391.45(4,425.62,8,496.22)      | 427.50(377.95,478.56) | 0.33(0.32,0.34)  | 65,451.98(32,760.09,129,991.48)   | 185.12 (92.93,369.39)                      | 0.35(0.34,0.36)  |
| <b>American Samoa</b>                   | 8.95(6.36,11.89)                 | 461.97(408.42,515.65) | 0.29(0.27,0.3)   | 100.85(50.15,204.33)              | 197.83 (98.09,398.87)                      | 0.28(0.26,0.3)   |
| <b>Andorra</b>                          | 50.24(35.30,68.59)               | 646.05(568.75,734.46) | 0.17(0.14,0.2)   | 449.81(229.26,912.19)             | 320.7 (163.4,651.97)                       | 0.19(0.16,0.23)  |
| <b>Angola</b>                           | 5,597.19(4,109.40,7,382.98)      | 437.94(389.41,495.15) | 0.23(0.23,0.24)  | 24,126.15(12,163.93,48,139.26)    | 197.77 (100.6,390.33)                      | 0.25(0.24,0.26)  |
| <b>Antigua and Barbuda</b>              | 38.12(27.86,49.91)               | 471.76(419.21,527.05) | 0.22(0.21,0.23)  | 215.05(107.75,431.43)             | 203.23 (102.13,408.34)                     | 0.21(0.19,0.22)  |
| <b>Argentina</b>                        | 19,620.88(14,733.99,25,177.71)   | 614.45(547.66,697.48) | 0.27(0.24,0.3)   | 156,881.77(79,843.59,312,317.03)  | 298.32 (151.85,594.44)                     | 0.29(0.28,0.29)  |
| <b>Armenia</b>                          | 997.24(698.11,1,340.09)          | 416.39(371.04,471.61) | 0.23(0.22,0.23)  | 8,002.62(4,072.40,15,978.51)      | 193.15 (98.05,386.94)                      | 0.22(0.21,0.23)  |
| <b>Australia</b>                        | 18,831.32(13,947.22,24,197.66)   | 648.75(576.00,733.27) | 0.33(0.31,0.36)  | 120,567.17(60,987.44,242,883.07)  | 312.92 (158.36,633.98)                     | 0.34(0.28,0.39)  |
| <b>Austria</b>                          | 5,032.81(3,685.16,6,570.04)      | 628.64(557.25,712.59) | 0.14(0.11,0.17)  | 49,589.88(25,230.45,99,414.54)    | 306.9 (155.39,620.12)                      | 0.18(0.14,0.22)  |
| <b>Azerbaijan</b>                       | 2,287.67(1,565.92,3,175.58)      | 429.80(382.22,486.24) | 0.18(0.08,0.28)  | 20,439.04(10,356.56,41,497.28)    | 202.76 (102.93,409)                        | 0.12(-0.02,0.26) |
| <b>Bahamas</b>                          | 155.14(111.62,206.73)            | 484.03(429.85,542.89) | 0.17(0.17,0.17)  | 863.07(429.02,1,751.21)           | 210.61 (104.54,430.07)                     | 0.16(0.16,0.17)  |
| <b>Bahrain</b>                          | 421.40(301.84,562.92)            | 434.38(384.22,483.10) | 0.23(0.21,0.24)  | 2,504.86(1,248.27,4,957.31)       | 188.71 (94.96,375.54)                      | 0.22(0.21,0.24)  |
| <b>Bangladesh</b>                       | 73,226.40(54,470.30,96,824.93)   | 393.10(351.69,440.11) | 0.26(0.26,0.27)  | 224,201.26(114,120.04,443,967.56) | 166.84 (85.41,331.66)                      | 0.29(0.28,0.31)  |
| <b>Barbados</b>                         | 207.31(151.66,269.32)            | 485.47(433.08,543.36) | 0.19(0.18,0.19)  | 1,018.11(511.90,2,029.57)         | 211.25 (106.25,420.29)                     | 0.18(0.17,0.2)   |
| <b>Belarus</b>                          | 2,590.73(1,804.15,3,557.11)      | 480.02(427.48,543.31) | 0.17(0.17,0.18)  | 34,965.55(17,679.56,69,355.82)    | 223.98 (113.49,442.67)                     | 0.18(0.17,0.19)  |
| <b>Belgium</b>                          | 6,788.13(4,997.20,8,859.57)      | 595.27(528.98,672.20) | 0.15(0.12,0.18)  | 58,294.01(29,774.62,115,123.53)   | 285.45 (145.75,565.37)                     | 0.15(0.13,0.17)  |
| <b>Belize</b>                           | 133.07(97.27,175.71)             | 488.32(433.67,547.41) | 0.32(0.3,0.33)   | 613.49(304.51,1,230.74)           | 211.72 (105.85,422.34)                     | 0.32(0.3,0.33)   |
| <b>Benin</b>                            | 814.48(573.77,1,082.03)          | 468.30(414.45,530.65) | 0.25(0.25,0.26)  | 10,998.36(5,533.94,21,555.71)     | 212.76 (107.45,418.78)                     | 0.3(0.29,0.31)   |
| <b>Bermuda</b>                          | 35.42(25.34,46.93)               | 497.10(441.29,559.56) | 0.11(0.1,0.11)   | 269.16(135.86,542.19)             | 219.02 (110.47,442.51)                     | 0.1(0.09,0.11)   |
| <b>Bhutan</b>                           | 341.72(247.41,456.58)            | 414.48(369.82,466.58) | 0.3(0.29,0.31)   | 1,039.97(527.22,2,086.78)         | 178.28 (90.5,357.67)                       | 0.33(0.31,0.34)  |
| <b>Bolivia (Plurinational State of)</b> | 4,951.72(3,678.60,6,424.89)      | 477.44(424.73,535.20) | 0.29(0.29,0.3)   | 19,007.00(9,550.12,38,247.75)     | 208.89 (105.17,418.62)                     | 0.32(0.31,0.33)  |
| <b>Bosnia and Herzegovina</b>           | 1,930.56(1,413.04,2,520.25)      | 395.44(352.86,445.40) | 0.23(0.22,0.24)  | 9,948.97(5,003.67,19,739.79)      | 170.97 (86.47,336.24)                      | 0.22(0.21,0.24)  |
| <b>Botswana</b>                         | 950.12(703.50,1,246.20)          | 492.86(438.27,555.16) | 0.31(0.31,0.32)  | 3,365.57(1,721.49,6,799.58)       | 225.75 (115.93,454.05)                     | 0.28(0.27,0.29)  |
| <b>Brazil</b>                           | 103,504.87(75,336.62,133,453.79) | 483.69(428.91,542.26) | 0.28(0.27,0.29)  | 497,542.54(249,691.82,985,231.37) | 206.16 (103.59,407.83)                     | 0.33(0.32,0.35)  |
| <b>Brunei Darussalam</b>                | 130.27(94.39,173.49)             | 686.30(610.76,775.51) | 0.21(0.17,0.25)  | 1,139.73(577.40,2,276.06)         | 335.18 (170.76,663.3)                      | 0.23(0.21,0.25)  |
| <b>Bulgaria</b>                         | 2,165.95(1,539.16,2,907.14)      | 406.22(362.78,455.86) | 0.12(0.11,0.14)  | 24,027.74(12,102.47,48,590.73)    | 177.68 (89.01,356.66)                      | 0.14(0.13,0.15)  |
| <b>Burkina Faso</b>                     | 1,470.10(1,055.62,1,924.24)      | 453.87(402.33,512.83) | 0.2(0.19,0.2)    | 19,995.19(10,080.67,39,054.39)    | 205.55 (104.49,402.29)                     | 0.24(0.24,0.25)  |
| <b>Burundi</b>                          | 2,175.74(1,578.05,2,898.98)      | 413.54(367.42,465.79) | 0.02(0.01,0.02)  | 9,075.22(4,570.31,17,874.96)      | 185.73 (94.2,365.72)                       | 0.01(0.01,0.02)  |
| <b>Cabo Verde</b>                       | 57.81(39.07,78.37)               | 470.22(418.54,529.83) | 0.2(0.19,0.21)   | 947.29(480.56,1,862.11)           | 215.42 (109.35,422.93)                     | 0.23(0.22,0.24)  |
| <b>Cambodia</b>                         | 2,499.67(1,835.09,3,300.10)      | 321.32(282.07,359.21) | 0.19(0.19,0.2)   | 16,581.94(8,201.87,33,482.40)     | 132.13 (65.6,265.07)                       | 0.23(0.22,0.25)  |
| <b>Cameroon</b>                         | 2,187.52(1,513.72,2,918.46)      | 480.75(426.91,538.16) | 0.15(0.14,0.15)  | 27,869.34(14,191.67,55,517.13)    | 218.16 (110.6,432.24)                      | 0.17(0.16,0.19)  |
| <b>Canada</b>                           | 31,065.03(22,873.44,39,974.29)   | 537.14(468.59,623.32) | 0.27(0.22,0.31)  | 177,239.88(89,976.87,360,128.28)  | 278.59 (140.59,567.98)                     | 0.21(0.2,0.22)   |
| <b>Central African Republic</b>         | 1,060.42(781.80,1,371.21)        | 422.15(375.89,475.26) | 0.08(0.08,0.09)  | 4,414.02(2,251.62,8,771.09)       | 189.75 (97.09,373.88)                      | 0.11(0.1,0.11)   |
| <b>Chad</b>                             | 890.71(642.21,1,185.36)          | 432.18(382.87,488.54) | 0.1(0.09,0.1)    | 11,487.33(5,841.03,22,778.38)     | 193.19 (98.54,380.2)                       | 0.08(0.07,0.09)  |

|                                              |                                   |                       |                 |                                         |                        |                    |
|----------------------------------------------|-----------------------------------|-----------------------|-----------------|-----------------------------------------|------------------------|--------------------|
| <b>Chile</b>                                 | 14,399.66(10,624.91,18,512.99)    | 624.25(554.39,707.65) | 0.25(0.23,0.27) | 72,290.26(36,869.57,145,450.96)         | 301.31 (153.5,605.84)  | 0.27(0.25,0.29)    |
| <b>China</b>                                 | 774,272.09(588,395.27,980,702.35) | 509.84(450.68,573.65) | 0.25(0.19,0.31) | 4,724,884.55(2,347,242.71,9,536,082.36) | 224.78 (112.45,452.3)  | 0.28(0.22,0.34)    |
| <b>Colombia</b>                              | 24,488.37(17,981.78,31,969.98)    | 470.96(417.14,531.76) | 0.25(0.24,0.27) | 108,191.97(54,299.06,218,538.88)        | 203.81 (102.27,411.22) | 0.29(0.28,0.3)     |
| <b>Comoros</b>                               | 234.97(170.77,311.97)             | 436.33(388.86,492.26) | 0.14(0.13,0.15) | 995.79(507.27,1,966.85)                 | 198.19 (101.14,390.23) | 0.17(0.16,0.18)    |
| <b>Congo</b>                                 | 1,365.81(963.88,1,807.22)         | 450.94(400.69,508.58) | 0.16(0.15,0.17) | 5,834.84(2,958.24,11,504.85)            | 203.99 (103.32,403.32) | 0.17(0.17,0.18)    |
| <b>Cook Islands</b>                          | 3.27(2.23,4.44)                   | 463.50(410.42,516.68) | 0.4(0.38,0.43)  | 49.13(24.71,98.88)                      | 199.04 (100.3,402.4)   | 0.43(0.39,0.46)    |
| <b>Costa Rica</b>                            | 3,434.58(2,546.73,4,402.02)       | 480.42(426.90,541.45) | 0.25(0.25,0.26) | 10,832.34(5,415.68,21,554.79)           | 207.86 (103.84,414.18) | 0.27(0.26,0.29)    |
| <b>Croatia</b>                               | 2,804.09(2,067.89,3,609.72)       | 406.00(362.57,455.23) | 0.14(0.13,0.14) | 14,225.73(7,207.88,28,541.10)           | 176.06 (89.04,346.62)  | 0.14(0.13,0.15)    |
| <b>Cuba</b>                                  | 6,389.33(4,638.99,8,273.38)       | 471.99(420.59,532.11) | 0.26(0.24,0.27) | 38,006.06(19,079.92,76,458.86)          | 203.62 (102.71,408)    | 0.28(0.26,0.29)    |
| <b>Cyprus</b>                                | 1,020.67(752.26,1,316.35)         | 603.97(535.25,689.49) | 0.18(0.14,0.22) | 5,536.25(2,828.35,11,116.68)            | 292.43 (149.05,589.44) | 0.21(0.2,0.23)     |
| <b>Czechia</b>                               | 4,382.21(3,104.59,5,801.98)       | 409.11(364.61,457.53) | 0.18(0.17,0.18) | 34,419.92(17,606.73,67,354.11)          | 177.09 (89.93,348.52)  | 0.18(0.18,0.19)    |
| <b>Côte d'Ivoire</b>                         | 1,764.20(1,251.29,2,335.31)       | 456.97(405.94,516.67) | 0.16(0.16,0.17) | 24,102.93(12,149.26,47,872.20)          | 206.61 (104.82,404.72) | 0.21(0.2,0.22)     |
| <b>Democratic People's Republic of Korea</b> | 13,057.96(9,347.64,17,309.18)     | 463.30(411.56,520.49) | 0.1(0.09,0.12)  | 68,292.77(34,037.92,137,697.93)         | 206.48 (103.05,414.37) | 0.1(0.09,0.1)      |
| <b>Democratic Republic of the Congo</b>      | 15,830.09(11,440.96,20,736.14)    | 427.04(378.08,479.04) | 0.04(0.03,0.05) | 73,280.12(37,274.21,143,850.29)         | 192.27 (98.79,375.11)  | 0.08(0.07,0.1)     |
| <b>Denmark</b>                               | 5,204.15(3,946.14,6,688.75)       | 600.37(532.36,684.01) | -0.03(-0.06,0)  | 30,500.51(15,440.58,60,975.94)          | 292.69 (147.71,591.13) | -0.07(-0.11,-0.04) |
| <b>Djibouti</b>                              | 350.23(249.10,467.77)             | 438.64(389.62,493.58) | 0.24(0.24,0.25) | 1,331.55(667.70,2,638.72)               | 199.09 (100.91,393.93) | 0.25(0.24,0.26)    |
| <b>Dominica</b>                              | 29.87(22.49,38.53)                | 468.74(417.83,527.55) | 0.16(0.15,0.18) | 180.19(91.11,362.40)                    | 201.9 (102.11,405.65)  | 0.15(0.14,0.17)    |
| <b>Dominican Republic</b>                    | 2,716.36(1,942.42,3,603.71)       | 473.75(421.65,531.53) | 0.31(0.29,0.33) | 19,475.61(9,733.22,39,320.98)           | 205.99 (103.35,415.82) | 0.35(0.33,0.36)    |
| <b>Ecuador</b>                               | 9,306.68(6,807.11,11,922.46)      | 546.12(492.82,600.88) | 0.37(0.36,0.38) | 38,388.58(19,295.91,75,579.18)          | 249.24 (125.06,490.71) | 0.43(0.42,0.44)    |
| <b>Egypt</b>                                 | 12,078.37(7,915.53,16,782.58)     | 432.80(383.20,484.50) | 0.26(0.25,0.28) | 127,343.97(62,957.72,254,833.15)        | 187.25 (93.64,377.13)  | 0.26(0.24,0.28)    |
| <b>El Salvador</b>                           | 2,155.77(1,520.33,2,884.40)       | 479.99(423.57,540.64) | 0.3(0.29,0.31)  | 12,070.69(6,064.50,24,142.63)           | 206.38 (103.69,412.18) | 0.32(0.3,0.33)     |
| <b>Equatorial Guinea</b>                     | 255.75(181.05,342.77)             | 467.33(416.80,525.00) | 0.41(0.4,0.42)  | 1,091.48(552.76,2,166.06)               | 211.5 (107.18,418.02)  | 0.47(0.46,0.49)    |
| <b>Eritrea</b>                               | 1,495.89(1,082.88,1,973.17)       | 420.78(372.97,474.15) | 0.13(0.12,0.14) | 5,498.96(2,803.39,10,722.61)            | 189.96 (97.01,373.43)  | 0.13(0.12,0.14)    |
| <b>Estonia</b>                               | 1,097.94(813.90,1,395.33)         | 485.81(432.53,549.59) | 0.17(0.15,0.18) | 5,425.11(2,767.93,10,724.08)            | 227.15 (115.54,448.27) | 0.19(0.17,0.2)     |
| <b>Eswatini</b>                              | 407.34(295.79,533.09)             | 504.78(450.39,567.53) | 0.2(0.19,0.21)  | 1,403.01(717.32,2,831.98)               | 231.36 (118.1,462)     | 0.16(0.15,0.17)    |
| <b>Ethiopia</b>                              | 19,289.54(14,088.42,25,762.97)    | 436.39(388.01,493.74) | 0.14(0.13,0.15) | 84,378.28(42,946.69,167,022.57)         | 194.89 (99.24,382.4)   | 0.17(0.16,0.18)    |
| <b>Fiji</b>                                  | 112.34(77.41,154.54)              | 437.08(387.21,490.36) | 0.34(0.33,0.35) | 1,500.15(748.30,3,027.61)               | 186.07 (93.34,372.78)  | 0.37(0.37,0.38)    |
| <b>Finland</b>                               | 6,884.37(5,109.82,8,842.70)       | 527.92(470.37,592.59) | 0.15(0.13,0.17) | 26,412.55(13,294.87,52,735.30)          | 243.62 (122.25,488.43) | 0.13(0.11,0.15)    |
| <b>France</b>                                | 37,135.90(26,863.45,49,096.30)    | 549.48(489.76,619.91) | 0.16(0.15,0.17) | 312,561.48(158,076.20,625,928.00)       | 259.05 (130.26,515.29) | 0.17(0.16,0.18)    |
| <b>Gabon</b>                                 | 496.56(364.80,646.39)             | 474.10(421.71,533.20) | 0.3(0.29,0.31)  | 2,403.02(1,206.55,4,783.61)             | 215.31 (108.86,425.64) | 0.3(0.29,0.32)     |
| <b>Gambia</b>                                | 160.32(115.54,214.32)             | 458.80(406.85,519.73) | 0.23(0.22,0.24) | 2,063.36(1,035.64,4,107.80)             | 207.53 (104.6,411.05)  | 0.22(0.21,0.24)    |
| <b>Georgia</b>                               | 1,102.28(776.09,1,487.73)         | 435.97(388.89,495.81) | 0.06(0.05,0.07) | 12,031.62(6,077.64,24,096.45)           | 207.19 (104.23,414.89) | 0.01(-0.01,0.04)   |
| <b>Germany</b>                               | 46,025.47(33,861.88,60,915.22)    | 516.02(461.53,578.52) | 0.15(0.13,0.18) | 398,600.96(200,643.70,806,389.93)       | 234.63 (118.4,469.69)  | 0.13(0.12,0.14)    |
| <b>Ghana</b>                                 | 2,458.59(1,715.24,3,353.34)       | 471.01(418.09,530.82) | 0.29(0.28,0.3)  | 36,782.74(18,730.62,73,370.17)          | 214.5 (109.58,423.83)  | 0.31(0.3,0.32)     |
| <b>Greece</b>                                | 5,110.71(3,628.73,6,803.00)       | 480.78(430.83,536.56) | 0.16(0.09,0.23) | 44,192.29(22,368.57,89,645.17)          | 212.63 (107.04,426.5)  | 0.21(0.14,0.27)    |
| <b>Greenland</b>                             | 29.86(22.34,38.93)                | 541.39(472.47,625.46) | 0.26(0.24,0.29) | 201.41(102.27,409.57)                   | 274.15 (139.51,555.56) | 0.18(0.17,0.19)    |
| <b>Grenada</b>                               | 27.84(19.18,36.97)                | 460.70(409.34,517.56) | 0.22(0.22,0.23) | 230.42(116.44,462.92)                   | 198.5 (100.72,395.66)  | 0.23(0.22,0.24)    |
| <b>Guam</b>                                  | 28.64(19.54,38.63)                | 452.71(399.88,503.39) | 0.32(0.31,0.34) | 383.65(189.84,774.31)                   | 197.21 (97.93,397.26)  | 0.35(0.33,0.36)    |
| <b>Guatemala</b>                             | 6,430.99(4,795.54,8,386.78)       | 456.89(405.13,512.44) | 0.29(0.28,0.3)  | 21,804.18(11,004.95,43,387.04)          | 194.24 (98.03,387.39)  | 0.31(0.3,0.32)     |
| <b>Guinea</b>                                | 880.95(638.24,1,150.32)           | 446.46(395.82,505.31) | 0.14(0.13,0.14) | 11,443.06(5,833.32,22,779.88)           | 200.78 (102.03,397.16) | 0.14(0.13,0.15)    |

|                                         |                                   |                       |                 |                                         |                        |                 |
|-----------------------------------------|-----------------------------------|-----------------------|-----------------|-----------------------------------------|------------------------|-----------------|
| <b>Guinea-Bissau</b>                    | 128.93(93.29,168.63)              | 446.60(397.20,502.82) | 0.13(0.12,0.13) | 1,545.62(785.64,3,059.71)               | 201.68 (103.46,397.25) | 0.15(0.15,0.16) |
| <b>Guyana</b>                           | 179.78(127.44,235.82)             | 465.04(412.47,523.46) | 0.24(0.23,0.25) | 1,299.48(650.42,2,581.52)               | 198.19 (99.56,391.73)  | 0.26(0.25,0.27) |
| <b>Haiti</b>                            | 3,471.75(2,468.98,4,560.95)       | 428.08(379.01,483.41) | 0.17(0.17,0.18) | 13,194.39(6,552.20,26,939.87)           | 180.32 (90.63,368.01)  | 0.16(0.15,0.18) |
| <b>Honduras</b>                         | 6,266.99(4,646.27,8,048.07)       | 460.70(409.68,518.31) | 0.27(0.26,0.28) | 12,329.29(6,255.35,24,589.81)           | 197.25 (99,394.18)     | 0.29(0.27,0.3)  |
| <b>Hungary</b>                          | 5,463.83(4,000.44,7,079.96)       | 413.74(369.10,464.69) | 0.14(0.13,0.15) | 32,461.17(16,263.33,65,469.55)          | 180.61 (90.26,362.61)  | 0.17(0.16,0.19) |
| <b>Iceland</b>                          | 169.15(121.69,223.85)             | 718.28(629.78,819.21) | 0.09(-0.02,0.2) | 1,900.84(959.43,3,802.49)               | 366 (185.84,727.24)    | 0.08(0.05,0.12) |
| <b>India</b>                            | 608,654.23(471,555.30,762,236.77) | 430.04(382.62,481.91) | 0.28(0.27,0.29) | 2,117,084.06(1,066,597.96,4,229,735.21) | 180.21 (91.12,360.7)   | 0.33(0.32,0.34) |
| <b>Indonesia</b>                        | 37,364.49(27,864.69,48,180.48)    | 337.87(299.56,376.41) | 0.31(0.29,0.32) | 327,077.46(162,642.41,658,051.57)       | 138.66 (68.73,279.87)  | 0.35(0.34,0.36) |
| <b>Iran (Islamic Republic of)</b>       | 15,365.80(10,876.54,20,208.52)    | 445.04(395.92,501.86) | 0.24(0.23,0.26) | 149,354.27(75,489.54,293,269.60)        | 195.27 (98.67,381.01)  | 0.26(0.24,0.28) |
| <b>Iraq</b>                             | 5,247.80(3,609.75,7,184.54)       | 425.84(378.79,475.45) | 0.15(0.14,0.16) | 45,113.50(22,709.48,89,016.55)          | 183.82 (92.73,367.26)  | 0.18(0.17,0.19) |
| <b>Ireland</b>                          | 5,146.97(3,811.29,6,582.02)       | 564.51(503.60,636.22) | 0.17(0.14,0.21) | 19,059.64(9,683.89,37,925.19)           | 265.27 (135.44,526.99) | 0.17(0.17,0.18) |
| <b>Israel</b>                           | 3,229.82(2,299.93,4,280.12)       | 611.80(542.74,694.98) | 0.13(0.09,0.17) | 32,806.34(16,602.93,65,850.41)          | 298.87 (151.72,601.76) | 0.15(0.13,0.17) |
| <b>Italy</b>                            | 39,605.02(29,588.00,50,839.88)    | 543.54(484.74,613.82) | 0.09(0.07,0.11) | 313,516.20(158,871.44,621,282.61)       | 249.18 (126.2,494.66)  | 0.12(0.1,0.14)  |
| <b>Jamaica</b>                          | 927.94(656.11,1,268.08)           | 469.75(419.04,526.24) | 0.24(0.24,0.25) | 6,055.96(3,051.08,11,982.16)            | 202.77 (102.01,401.31) | 0.25(0.23,0.26) |
| <b>Japan</b>                            | 98,687.02(73,542.04,126,828.88)   | 645.28(575.41,724.99) | 0.15(0.12,0.19) | 893,674.46(452,866.41,1,784,591.80)     | 304.67 (153.77,607.84) | 0.24(0.18,0.31) |
| <b>Jordan</b>                           | 1,487.28(996.70,2,044.12)         | 437.70(389.54,489.42) | 0.32(0.31,0.33) | 13,920.23(6,963.52,27,536.45)           | 191.28 (95.19,383.94)  | 0.35(0.34,0.37) |
| <b>Kazakhstan</b>                       | 10,146.45(7,065.91,13,762.34)     | 431.09(384.67,488.41) | 0.16(0.15,0.16) | 35,804.37(18,204.53,71,001.74)          | 200.49 (101.8,396.67)  | 0.14(0.13,0.15) |
| <b>Kenya</b>                            | 11,926.10(8,748.00,15,540.52)     | 455.14(405.13,514.26) | 0.18(0.17,0.19) | 47,930.16(24,292.21,94,462.84)          | 203.46 (103.22,399.35) | 0.2(0.19,0.2)   |
| <b>Kiribati</b>                         | 13.05(9.05,17.54)                 | 422.24(372.89,474.57) | 0.26(0.25,0.27) | 133.41(66.48,272.05)                    | 179.15 (90.11,364.51)  | 0.29(0.27,0.31) |
| <b>Kuwait</b>                           | 796.87(523.89,1,108.70)           | 451.57(400.39,505.66) | 0.34(0.32,0.36) | 6,374.39(3,165.39,12,711.89)            | 196.69 (98.54,392.03)  | 0.32(0.3,0.33)  |
| <b>Kyrgyzstan</b>                       | 3,570.46(2,677.45,4,597.23)       | 404.45(361.33,459.69) | 0.12(0.1,0.13)  | 9,034.50(4,571.31,18,079.79)            | 188.78 (95.48,376.91)  | 0.1(0.1,0.11)   |
| <b>Lao People's Democratic Republic</b> | 929.15(670.95,1,245.98)           | 325.75(287.90,364.72) | 0.27(0.26,0.29) | 6,356.17(3,132.18,12,847.97)            | 134.77 (66.72,272.05)  | 0.31(0.29,0.32) |
| <b>Latvia</b>                           | 1,452.21(1,082.29,1,853.04)       | 485.43(432.82,549.71) | 0.15(0.15,0.16) | 8,226.85(4,189.51,16,293.08)            | 226.4 (114.34,445.6)   | 0.17(0.16,0.18) |
| <b>Lebanon</b>                          | 893.78(628.26,1,210.92)           | 429.99(381.46,483.45) | 0.35(0.33,0.36) | 9,608.53(4,871.06,18,961.94)            | 185.74 (94.2,366.5)    | 0.36(0.35,0.38) |
| <b>Lesotho</b>                          | 801.78(595.10,1,029.62)           | 476.66(424.57,538.10) | 0.24(0.23,0.25) | 2,867.02(1,470.17,5,716.01)             | 217.71 (111.79,434.16) | 0.2(0.19,0.2)   |
| <b>Liberia</b>                          | 342.93(247.83,458.21)             | 466.60(414.69,522.87) | 0.22(0.21,0.24) | 4,698.39(2,388.61,9,294.93)             | 208.81 (107.19,410.41) | 0.25(0.23,0.26) |
| <b>Libya</b>                            | 1,011.95(700.01,1,372.90)         | 433.90(385.08,488.07) | 0.24(0.23,0.25) | 10,363.12(5,239.59,20,677.77)           | 187.6 (94.41,374.52)   | 0.23(0.22,0.23) |
| <b>Lithuania</b>                        | 2,219.72(1,653.06,2,810.66)       | 436.74(390.48,492.39) | 0.17(0.15,0.19) | 10,277.21(5,196.79,20,381.45)           | 193.98 (97.85,382.9)   | 0.21(0.17,0.24) |
| <b>Luxembourg</b>                       | 293.13(212.36,385.28)             | 561.35(501.47,633.38) | 0.13(0.12,0.15) | 2,530.55(1,275.33,5,036.50)             | 263.8 (133.38,524.73)  | 0.12(0.1,0.13)  |
| <b>Madagascar</b>                       | 5,339.66(3,859.92,6,934.36)       | 420.66(374.66,476.57) | 0.1(0.1,0.11)   | 22,676.58(11,475.50,44,815.68)          | 190.02 (97.07,374.24)  | 0.13(0.12,0.14) |
| <b>Malawi</b>                           | 3,773.82(2,760.03,4,974.49)       | 437.57(387.54,493.40) | 0.18(0.17,0.19) | 14,998.12(7,654.87,29,396.32)           | 197.96 (101.2,391.55)  | 0.2(0.19,0.21)  |
| <b>Malaysia</b>                         | 4,544.31(3,145.60,6,177.53)       | 354.16(313.34,396.68) | 0.35(0.34,0.37) | 41,779.08(20,439.38,83,953.86)          | 148.71 (72.97,299.71)  | 0.41(0.39,0.42) |
| <b>Maldives</b>                         | 76.56(52.86,105.41)               | 333.59(294.21,374.24) | 0.41(0.38,0.44) | 487.92(240.75,983.79)                   | 141.01 (69.53,284.42)  | 0.53(0.51,0.56) |
| <b>Mali</b>                             | 1,433.54(1,014.95,1,893.75)       | 441.64(391.96,497.29) | 0.16(0.15,0.16) | 18,012.40(9,099.12,35,595.10)           | 199.02 (100.04,392.25) | 0.18(0.17,0.18) |
| <b>Malta</b>                            | 225.05(166.07,292.44)             | 563.72(501.95,633.55) | 0.17(0.14,0.2)  | 2,235.91(1,125.36,4,476.49)             | 265.96 (134.2,530.15)  | 0.19(0.18,0.21) |
| <b>Marshall Islands</b>                 | 8.60(6.14,11.60)                  | 406.26(358.35,456.51) | 0.31(0.29,0.34) | 64.99(32.30,130.15)                     | 169.49 (84.45,338.11)  | 0.3(0.28,0.32)  |
| <b>Mauritania</b>                       | 357.64(259.37,472.75)             | 479.07(424.33,541.09) | 0.21(0.2,0.21)  | 4,739.73(2,413.83,9,458.22)             | 218.34 (111.09,432.37) | 0.21(0.2,0.22)  |
| <b>Mauritius</b>                        | 384.61(275.26,510.67)             | 354.56(313.26,396.83) | 0.32(0.32,0.33) | 2,659.51(1,318.19,5,288.40)             | 147.85 (73.19,293.79)  | 0.34(0.33,0.36) |
| <b>Mexico</b>                           | 102,187.70(78,727.27,130,521.66)  | 582.25(517.01,660.02) | 0.3(0.29,0.3)   | 320,956.74(163,825.25,624,688.88)       | 266.69 (135.61,518.29) | 0.37(0.32,0.42) |
| <b>Micronesia (Federated States of)</b> | 16.08(11.58,21.36)                | 426.53(378.28,477.05) | 0.27(0.26,0.28) | 140.62(69.60,284.65)                    | 181.86 (90.37,365.52)  | 0.28(0.26,0.3)  |
| <b>Monaco</b>                           | 15.32(10.82,20.71)                | 578.54(516.16,654.05) | 0.12(0.1,0.14)  | 228.21(115.04,451.04)                   | 272.83 (137.43,538.95) | 0.12(0.1,0.14)  |



|                                         |                                |                       |                 |                                     |                        |                   |
|-----------------------------------------|--------------------------------|-----------------------|-----------------|-------------------------------------|------------------------|-------------------|
| <b>Mongolia</b>                         | 1,041.19(760.72,1,360.27)      | 404.02(359.87,458.60) | 0.17(0.15,0.19) | 4,713.41(2,402.06,9,453.93)         | 188.25 (95.46,377.52)  | 0.17(0.14,0.2)    |
| <b>Montenegro</b>                       | 208.52(151.49,276.38)          | 404.14(361.01,454.81) | 0.12(0.11,0.12) | 1,701.84(859.09,3,355.83)           | 176.05 (88.66,347.85)  | 0.11(0.11,0.12)   |
| <b>Morocco</b>                          | 5,255.43(3,658.33,7,094.18)    | 418.42(372.53,471.35) | 0.3(0.29,0.31)  | 59,341.37(29,856.59,117,163.51)     | 180.49 (90.36,357.17)  | 0.31(0.31,0.32)   |
| <b>Mozambique</b>                       | 5,977.33(4,359.90,8,001.94)    | 430.99(383.38,487.18) | 0.16(0.15,0.17) | 22,356.25(11,304.01,44,188.00)      | 193.24 (97.55,381.51)  | 0.18(0.17,0.19)   |
| <b>Myanmar</b>                          | 10,121.13(7,412.23,13,404.98)  | 328.58(291.24,366.98) | 0.3(0.28,0.32)  | 66,519.51(33,036.30,134,461.05)     | 135.48 (67.14,274.16)  | 0.33(0.31,0.35)   |
| <b>Namibia</b>                          | 913.98(666.44,1,192.97)        | 471.04(420.20,532.58) | 0.18(0.16,0.2)  | 3,176.52(1,615.73,6,231.79)         | 216.51 (110.41,422.02) | 0.17(0.16,0.19)   |
| <b>Nauru</b>                            | 1.30(0.90,1.75)                | 434.03(382.96,485.98) | 0.31(0.3,0.33)  | 9.22(4.61,18.74)                    | 185.44 (91.43,376.19)  | 0.33(0.31,0.35)   |
| <b>Nepal</b>                            | 13,262.58(9,826.64,17,544.29)  | 408.37(364.68,457.87) | 0.35(0.34,0.36) | 39,900.30(20,152.88,79,474.42)      | 173.52 (88.21,346.57)  | 0.4(0.39,0.41)    |
| <b>Netherlands</b>                      | 15,109.76(11,005.05,19,723.21) | 535.25(479.53,601.33) | 0.09(0.05,0.13) | 77,078.53(39,094.46,154,352.86)     | 245.27 (125.37,490.32) | 0.06(0.01,0.12)   |
| <b>New Zealand</b>                      | 4,086.41(3,057.20,5,264.19)    | 652.35(580.93,738.27) | 0.27(0.25,0.29) | 22,687.89(11,424.59,45,454.97)      | 310.29 (156.19,621.11) | 0.25(0.24,0.26)   |
| <b>Nicaragua</b>                        | 2,665.92(1,939.52,3,469.55)    | 467.38(414.91,525.90) | 0.27(0.27,0.28) | 9,305.84(4,652.42,18,618.58)        | 201.24 (100.59,402.74) | 0.29(0.28,0.31)   |
| <b>Niger</b>                            | 1,236.28(887.43,1,624.87)      | 436.57(387.13,490.70) | 0.13(0.12,0.13) | 16,361.25(8,300.24,32,434.65)       | 197.14 (100.1,386.74)  | 0.13(0.12,0.14)   |
| <b>Nigeria</b>                          | 14,228.00(10,025.74,18,795.52) | 471.92(418.93,532.92) | 0.17(0.16,0.18) | 198,149.50(100,690.20,393,208.76)   | 210.81 (107.35,414.62) | 0.16(0.14,0.18)   |
| <b>Niue</b>                             | 0.34(0.24,0.45)                | 450.28(398.58,503.67) | 0.33(0.32,0.35) | 4.22(2.08,8.50)                     | 193.22 (95.48,388.02)  | 0.35(0.34,0.37)   |
| <b>North Macedonia</b>                  | 578.08(399.02,784.19)          | 399.39(355.49,447.79) | 0.17(0.16,0.18) | 5,582.12(2,820.16,11,000.64)        | 173.36 (87.73,341.7)   | 0.18(0.17,0.19)   |
| <b>Northern Mariana Islands</b>         | 9.61(6.90,12.69)               | 440.27(387.24,492.07) | 0.31(0.22,0.4)  | 115.23(56.54,232.01)                | 189.62 (93.79,380.08)  | 0.3(0.24,0.35)    |
| <b>Norway</b>                           | 4,446.19(3,322.88,5,758.28)    | 618.49(551.99,702.08) | 0.14(0.11,0.17) | 26,284.59(13,344.36,52,560.96)      | 297.53 (150.85,595.94) | 0.13(0.11,0.16)   |
| <b>Oman</b>                             | 558.81(375.81,762.22)          | 424.63(377.45,475.09) | 0.46(0.43,0.5)  | 4,051.44(2,027.11,8,145.51)         | 185.77 (92.97,364.29)  | 0.51(0.48,0.53)   |
| <b>Pakistan</b>                         | 75,356.40(56,476.74,95,051.11) | 381.39(338.91,432.79) | 0.34(0.31,0.36) | 187,539.68(94,081.51,374,246.45)    | 160.06 (80.82,315.95)  | 0.36(0.33,0.38)   |
| <b>Palau</b>                            | 3.55(2.49,4.71)                | 445.63(394.67,496.83) | 0.29(0.28,0.3)  | 45.72(22.59,91.95)                  | 192.11 (95.25,386.83)  | 0.32(0.31,0.34)   |
| <b>Palestine</b>                        | 565.74(395.98,755.48)          | 415.28(370.34,465.39) | 0.14(0.13,0.16) | 4,589.71(2,321.17,9,133.25)         | 178.7 (89.53,350.26)   | 0.15(0.13,0.17)   |
| <b>Panama</b>                           | 1,718.15(1,210.72,2,283.39)    | 465.91(412.59,525.18) | 0.36(0.35,0.37) | 8,369.83(4,170.17,16,822.60)        | 200.93 (100.26,404.46) | 0.4(0.38,0.41)    |
| <b>Papua New Guinea</b>                 | 972.45(672.21,1,326.72)        | 384.63(339.60,430.91) | 0.19(0.17,0.21) | 8,443.66(4,211.99,17,120.24)        | 159.4 (78.8,321.4)     | 0.19(0.18,0.2)    |
| <b>Paraguay</b>                         | 3,332.59(2,257.17,4,493.62)    | 461.42(409.44,518.73) | 0.23(0.23,0.24) | 11,279.27(5,651.94,22,751.60)       | 199.01 (99.78,399.02)  | 0.25(0.24,0.26)   |
| <b>Peru</b>                             | 13,150.29(9,550.24,17,342.48)  | 474.79(421.11,531.34) | 0.33(0.32,0.35) | 66,524.80(33,457.42,134,366.58)     | 205.88 (103.66,414.11) | 0.36(0.34,0.39)   |
| <b>Philippines</b>                      | 18,267.48(13,166.80,23,930.73) | 318.32(281.97,355.89) | 0.35(0.34,0.37) | 108,332.51(53,495.55,218,308.95)    | 131.27 (65.08,263.88)  | 0.38(0.36,0.41)   |
| <b>Poland</b>                           | 28,807.97(21,422.70,37,160.94) | 424.22(378.32,475.07) | 0.23(0.22,0.24) | 122,273.37(61,771.55,239,682.70)    | 184.07 (92.47,360.17)  | 0.28(0.27,0.29)   |
| <b>Portugal</b>                         | 6,657.16(4,914.86,8,594.53)    | 574.61(514.02,648.09) | 0.17(0.16,0.18) | 58,266.01(29,501.02,116,348.28)     | 273.24 (137.57,544.57) | 0.19(0.18,0.21)   |
| <b>Puerto Rico</b>                      | 2,272.63(1,656.89,3,029.63)    | 518.94(460.51,580.95) | 0.24(0.22,0.25) | 14,631.84(7,371.89,29,378.70)       | 227.38 (114.21,453.35) | 0.26(0.25,0.28)   |
| <b>Qatar</b>                            | 421.00(280.24,592.09)          | 439.14(390.47,489.85) | 0.2(0.19,0.22)  | 2,878.23(1,435.76,5,805.88)         | 189.47 (95.37,379.64)  | 0.15(0.14,0.16)   |
| <b>Republic of Korea</b>                | 29,201.43(21,353.61,38,703.71) | 734.40(654.27,830.95) | 0(-0.05,0.05)   | 334,791.59(169,397.27,661,648.87)   | 369.39 (186.93,729.56) | -0.01(-0.08,0.06) |
| <b>Republic of Moldova</b>              | 1,079.07(793.32,1,437.37)      | 479.67(427.95,542.42) | 0.24(0.23,0.25) | 12,761.29(6,581.24,25,398.64)       | 223.03 (114.68,442.9)  | 0.26(0.25,0.27)   |
| <b>Romania</b>                          | 6,096.94(4,302.96,8,150.14)    | 405.75(362.14,456.97) | 0.21(0.2,0.22)  | 62,060.51(31,230.18,122,942.22)     | 177.63 (89.28,354.52)  | 0.25(0.24,0.26)   |
| <b>Russian Federation</b>               | 64,908.83(49,771.11,82,234.59) | 645.75(567.38,742.28) | 0.03(-0.03,0.1) | 764,513.48(391,696.41,1,529,769.93) | 331.3 (170.02,665.5)   | -0.05(-0.14,0.04) |
| <b>Rwanda</b>                           | 3,288.02(2,393.56,4,424.79)    | 435.60(385.36,491.46) | 0.15(0.14,0.16) | 12,592.22(6,380.10,24,849.56)       | 197.05 (100.13,385.1)  | 0.18(0.16,0.2)    |
| <b>Saint Kitts and Nevis</b>            | 28.75(20.45,38.32)             | 482.90(429.82,544.72) | 0.22(0.21,0.24) | 147.95(73.93,295.06)                | 209.26 (104.62,420.28) | 0.24(0.23,0.26)   |
| <b>Saint Lucia</b>                      | 82.13(60.56,106.87)            | 472.82(419.26,530.57) | 0.25(0.24,0.26) | 446.01(222.17,894.68)               | 203.08 (101.69,409.14) | 0.26(0.25,0.27)   |
| <b>Saint Vincent and the Grenadines</b> | 33.49(24.32,44.57)             | 467.15(415.23,524.75) | 0.26(0.25,0.26) | 276.01(139.08,554.79)               | 200.48 (101.08,403.28) | 0.25(0.23,0.26)   |
| <b>Samoa</b>                            | 29.17(20.87,38.94)             | 431.63(381.00,485.14) | 0.17(0.16,0.18) | 284.03(139.43,577.57)               | 185.04 (91.01,375.52)  | 0.18(0.17,0.19)   |
| <b>San Marino</b>                       | 14.03(9.47,19.49)              | 571.08(509.29,642.94) | 0.16(0.12,0.19) | 155.22(78.21,311.47)                | 268.16 (134.88,534.34) | 0.15(0.14,0.15)   |
| <b>Sao Tome and Principe</b>            | 17.59(12.31,23.39)             | 468.75(417.00,529.91) | 0.19(0.18,0.2)  | 241.75(122.07,478.24)               | 213.12 (108.59,419.91) | 0.2(0.19,0.21)    |



|                                     |                                   |                       |                 |                                         |                        |                 |
|-------------------------------------|-----------------------------------|-----------------------|-----------------|-----------------------------------------|------------------------|-----------------|
| <b>Saudi Arabia</b>                 | 5,140.01(3,389.13,7,174.91)       | 503.99(447.92,565.15) | 0.37(0.35,0.38) | 52,545.17(26,610.08,104,733.77)         | 233.13 (118.78,457.81) | 0.35(0.33,0.36) |
| <b>Senegal</b>                      | 1,170.02(849.23,1,550.04)         | 458.61(407.88,517.18) | 0.13(0.12,0.15) | 16,271.25(8,266.92,32,529.06)           | 207.06 (105.23,411.19) | 0.14(0.13,0.15) |
| <b>Serbia</b>                       | 3,629.40(2,643.23,4,748.82)       | 406.57(362.91,456.41) | 0.19(0.18,0.2)  | 26,674.69(13,466.74,53,066.49)          | 176.96 (89.19,350.02)  | 0.19(0.18,0.21) |
| <b>Seychelles</b>                   | 16.32(11.40,21.68)                | 355.91(315.42,398.82) | 0.24(0.21,0.26) | 176.35(88.06,354.65)                    | 149.82 (74.73,302.6)   | 0.24(0.22,0.25) |
| <b>Sierra Leone</b>                 | 573.85(409.17,776.49)             | 447.18(396.00,504.82) | 0.15(0.15,0.16) | 7,605.76(3,838.49,15,034.76)            | 201.91 (102.53,397.23) | 0.18(0.17,0.19) |
| <b>Singapore</b>                    | 1,822.77(1,250.27,2,461.38)       | 678.69(608.33,766.82) | 0.04(0.01,0.07) | 27,041.44(13,574.19,53,809.77)          | 333.41 (167.27,663.28) | 0.1(0.06,0.13)  |
| <b>Slovakia</b>                     | 1,751.76(1,231.01,2,339.41)       | 409.45(365.47,460.17) | 0.16(0.15,0.17) | 16,011.06(8,028.53,31,860.19)           | 178.64 (89.67,354.54)  | 0.18(0.17,0.19) |
| <b>Slovenia</b>                     | 1,601.72(1,159.21,2,086.96)       | 409.65(367.13,459.02) | 0.19(0.18,0.2)  | 7,069.57(3,575.87,14,069.64)            | 178.54 (89.97,352.23)  | 0.22(0.21,0.23) |
| <b>Solomon Islands</b>              | 88.90(62.39,116.23)               | 401.67(354.86,452.16) | 0.29(0.28,0.3)  | 570.96(284.08,1,163.02)                 | 168.45 (84.48,342.34)  | 0.31(0.29,0.32) |
| <b>Somalia</b>                      | 4,161.64(3,008.49,5,605.48)       | 422.30(376.35,478.58) | 0.1(0.09,0.1)   | 13,432.36(6,871.01,26,407.72)           | 190.77 (97.16,375.35)  | 0.11(0.1,0.12)  |
| <b>South Africa</b>                 | 31,797.94(24,071.39,40,803.82)    | 517.04(462.10,582.11) | 0.17(0.16,0.18) | 108,715.42(55,085.89,213,875.92)        | 234.13 (119.18,459.6)  | 0.15(0.14,0.16) |
| <b>South Sudan</b>                  | 1,819.23(1,307.03,2,437.99)       | 428.77(381.73,480.25) | 0.16(0.16,0.17) | 7,984.65(4,071.88,15,658.68)            | 189.12 (96.82,371.85)  | 0.15(0.14,0.17) |
| <b>Spain</b>                        | 26,429.36(19,443.98,34,236.00)    | 596.00(505.70,727.71) | 0.39(0.34,0.44) | 249,037.16(119,428.59,509,141.48)       | 288.48 (137.84,587.57) | 0.49(0.44,0.54) |
| <b>Sri Lanka</b>                    | 3,575.08(2,485.91,4,824.26)       | 335.47(295.78,374.19) | 0.3(0.29,0.31)  | 36,238.60(17,965.89,72,964.31)          | 138.5 (68.91,278.95)   | 0.32(0.31,0.32) |
| <b>Sudan</b>                        | 3,752.20(2,636.69,5,137.59)       | 410.27(363.86,462.76) | 0.41(0.4,0.42)  | 34,719.10(17,492.37,68,872.56)          | 175.79 (88.9,351.18)   | 0.44(0.42,0.45) |
| <b>Suriname</b>                     | 143.65(101.58,189.72)             | 478.82(425.47,537.30) | 0.27(0.26,0.28) | 1,279.44(639.74,2,562.91)               | 206.41 (103.32,414.81) | 0.28(0.27,0.3)  |
| <b>Sweden</b>                       | 9,022.54(6,739.65,11,727.26)      | 454.12(402.95,511.60) | 0.28(0.23,0.33) | 37,473.76(18,997.74,74,950.55)          | 202.03 (101.97,399.24) | 0.31(0.23,0.39) |
| <b>Switzerland</b>                  | 6,198.40(4,443.48,8,128.62)       | 549.07(487.00,622.29) | 0.09(0.07,0.11) | 40,818.98(20,635.25,80,839.45)          | 258.58 (130.2,512.95)  | 0.11(0.09,0.13) |
| <b>Syrian Arab Republic</b>         | 2,072.97(1,415.87,2,802.05)       | 420.46(373.75,472.90) | 0.23(0.21,0.24) | 24,153.87(12,076.82,47,649.65)          | 180.41 (90.68,357.11)  | 0.22(0.19,0.24) |
| <b>Taiwan (Province of China)</b>   | 11,228.73(8,060.59,14,545.18)     | 511.77(454.28,575.21) | 0.35(0.32,0.37) | 90,507.73(45,486.64,182,995.87)         | 229.94 (115.79,466.81) | 0.4(0.36,0.43)  |
| <b>Tajikistan</b>                   | 2,868.70(2,143.08,3,704.60)       | 386.87(344.28,439.46) | 0.09(0.08,0.1)  | 9,808.53(4,958.58,19,783.09)            | 178.74 (91,356.03)     | 0.05(0.04,0.06) |
| <b>Thailand</b>                     | 27,535.92(19,786.65,36,593.80)    | 371.33(328.47,414.81) | 0.5(0.49,0.51)  | 165,800.73(81,257.11,333,400.11)        | 157.32 (77.37,316.11)  | 0.59(0.57,0.6)  |
| <b>Timor-Leste</b>                  | 150.50(107.78,199.44)             | 309.65(272.94,347.00) | 0.16(0.15,0.17) | 1,050.18(523.39,2,115.98)               | 126.23 (63.03,254.17)  | 0.15(0.13,0.17) |
| <b>Togo</b>                         | 600.36(428.87,795.44)             | 454.25(404.79,512.41) | 0.17(0.16,0.18) | 8,210.00(4,109.00,16,319.18)            | 206.55 (103.88,409.02) | 0.2(0.19,0.21)  |
| <b>Tokelau</b>                      | 0.21(0.15,0.28)                   | 432.70(380.80,486.72) | 0.31(0.28,0.34) | 2.50(1.24,5.04)                         | 184.63 (91.84,371.92)  | 0.35(0.31,0.38) |
| <b>Tonga</b>                        | 13.90(9.80,18.41)                 | 437.77(386.61,488.42) | 0.26(0.25,0.28) | 151.41(75.90,305.31)                    | 187.88 (94.01,379.1)   | 0.3(0.28,0.31)  |
| <b>Trinidad and Tobago</b>          | 834.02(611.83,1,122.78)           | 480.31(425.12,539.28) | 0.22(0.21,0.23) | 3,892.13(1,965.74,7,886.83)             | 207.64 (104.83,420.76) | 0.23(0.2,0.26)  |
| <b>Tunisia</b>                      | 1,992.61(1,377.64,2,743.35)       | 422.84(375.92,475.46) | 0.28(0.27,0.29) | 23,773.07(11,999.58,47,642.87)          | 183.04 (92.57,368.2)   | 0.3(0.29,0.3)   |
| <b>Turkey</b>                       | 32,813.13(24,231.49,42,623.65)    | 416.58(369.70,465.96) | 0.32(0.31,0.33) | 159,044.52(78,292.11,319,393.77)        | 175.72 (86.69,352.94)  | 0.36(0.35,0.38) |
| <b>Turkmenistan</b>                 | 1,016.36(710.74,1,373.41)         | 395.33(353.48,446.16) | 0.27(0.26,0.27) | 7,337.83(3,701.07,14,518.76)            | 179.47 (91.14,353.95)  | 0.3(0.29,0.32)  |
| <b>Tuvalu</b>                       | 1.74(1.22,2.30)                   | 419.78(371.98,470.92) | 0.24(0.22,0.26) | 18.87(9.40,37.86)                       | 179.03 (89.51,359.86)  | 0.28(0.27,0.3)  |
| <b>Uganda</b>                       | 7,000.40(5,079.48,9,242.47)       | 432.27(384.73,487.90) | 0.17(0.16,0.18) | 29,173.83(14,772.60,57,875.34)          | 195.29 (99.33,386.5)   | 0.2(0.19,0.22)  |
| <b>Ukraine</b>                      | 12,064.79(8,516.27,15,995.49)     | 462.02(411.00,523.46) | 0.11(0.1,0.12)  | 154,399.62(79,088.68,309,548.34)        | 207.6 (106.02,413.34)  | 0.13(0.09,0.17) |
| <b>United Arab Emirates</b>         | 1,484.46(973.38,2,033.56)         | 423.00(377.03,477.57) | 0.31(0.29,0.33) | 11,637.44(5,755.44,23,431.70)           | 183.51 (92.61,362.77)  | 0.3(0.29,0.32)  |
| <b>United Kingdom</b>               | 66,660.84(50,538.39,85,074.24)    | 595.99(531.77,670.72) | 0.21(0.18,0.25) | 314,504.82(159,014.40,625,597.54)       | 275.41 (139.42,545.21) | 0.24(0.2,0.27)  |
| <b>United Republic of Tanzania</b>  | 12,887.90(9,427.85,17,052.05)     | 444.37(393.84,500.15) | 0.19(0.18,0.19) | 52,216.44(26,243.50,103,021.79)         | 200.96 (101.6,395.61)  | 0.21(0.21,0.22) |
| <b>United States of America</b>     | 257,883.56(192,869.73,328,514.77) | 760.22(675.98,859.03) | 0.2(0.16,0.24)  | 1,986,342.81(1,023,960.15,3,964,292.06) | 378.11 (194.78,759.77) | 0.15(0.1,0.19)  |
| <b>United States Virgin Islands</b> | 45.24(32.24,59.83)                | 509.88(452.59,571.01) | 0.2(0.19,0.21)  | 402.99(201.56,813.89)                   | 223.35 (111.35,451.82) | 0.2(0.19,0.21)  |
| <b>Uruguay</b>                      | 1,761.35(1,282.82,2,316.15)       | 620.69(552.32,704.81) | 0.27(0.26,0.29) | 15,091.56(7,699.57,30,461.38)           | 301.89 (154.34,609.15) | 0.29(0.28,0.31) |
| <b>Uzbekistan</b>                   | 21,247.20(15,500.48,27,503.57)    | 411.99(366.27,468.57) | 0.2(0.19,0.22)  | 43,716.17(22,151.00,88,105.77)          | 191.48 (96.84,386.09)  | 0.17(0.16,0.18) |
| <b>Vanuatu</b>                      | 34.74(24.34,46.54)                | 406.37(359.04,457.24) | 0.26(0.25,0.28) | 308.83(153.90,620.95)                   | 170.79 (84.89,343.47)  | 0.27(0.25,0.3)  |

|                                           |                                |                       |                 |                                  |                        |                 |
|-------------------------------------------|--------------------------------|-----------------------|-----------------|----------------------------------|------------------------|-----------------|
| <b>Venezuela (Bolivarian Republic of)</b> | 19,779.35(14,606.65,25,663.17) | 449.48(398.45,504.97) | 0.24(0.23,0.24) | 56,808.51(27,760.15,115,909.34)  | 189.7 (93.27,387.3)    | 0.27(0.26,0.28) |
| <b>Viet Nam</b>                           | 19,649.93(14,229.72,25,909.09) | 319.36(282.37,358.86) | 0.21(0.2,0.21)  | 132,001.25(64,733.83,262,872.87) | 132.86 (65.25,265.37)  | 0.23(0.22,0.25) |
| <b>Yemen</b>                              | 2,511.47(1,734.83,3,349.81)    | 383.53(340.86,430.61) | 0.24(0.23,0.25) | 22,942.60(11,441.75,45,261.82)   | 163.66 (82.13,326.05)  | 0.23(0.22,0.25) |
| <b>Zambia</b>                             | 4,236.42(3,166.38,5,543.81)    | 438.34(388.55,495.54) | 0.15(0.15,0.16) | 14,138.61(7,167.36,28,005.92)    | 197.9 (100.83,390.13)  | 0.18(0.17,0.19) |
| <b>Zimbabwe</b>                           | 2,573.66(1,874.16,3,363.11)    | 462.14(411.24,520.92) | 0.09(0.08,0.11) | 15,665.69(7,983.88,30,936.28)    | 212.25 (108.27,418.58) | 0.06(0.05,0.07) |

**Table S10.** The numbers (2019), ASRs per 100,000 (2019), and AAPCs (1990-2019) in incidence and DALY for LBP in 204 countries.

| Characteristic                   | Incident cases                          |                             |                    | DALYs                                   |                                         |                    |
|----------------------------------|-----------------------------------------|-----------------------------|--------------------|-----------------------------------------|-----------------------------------------|--------------------|
|                                  | Numbers<br>(95% UI)                     | ASIR<br>(95% UI)            | AAPC<br>(95% CI)   | Numbers<br>(95% UI)                     | Age-standardized DALYs<br>rate (95% UI) | AAPC<br>(95% CI)   |
| Afghanistan                      | 781,631.07(677,351.32,895,750.23)       | 3,108.21(2,743.75,3,521.47) | 0.02(0.02,0.02)    | 196,023.03(136,063.66,264,247.02)       | 803.62(567.98,1,075.42)                 | 0.03(0.02,0.05)    |
| Albania                          | 134,797.04(119,403.09,153,322.25)       | 4,099.45(3,626.32,4,642.50) | -0.06(-0.06,-0.05) | 38,226.20(26,774.73,51,601.05)          | 1,141.56(793.58,1,551.90)               | -0.05(-0.06,-0.05) |
| Algeria                          | 1,257,427.26(1,097,528.94,1,445,307.66) | 3,081.24(2,713.31,3,497.96) | -0.06(-0.07,-0.06) | 333,812.78(230,155.32,447,251.64)       | 816.54(567.81,1,093.97)                 | -0.07(-0.08,-0.07) |
| American Samoa                   | 2,020.89(1,787.38,2,288.67)             | 3,840.08(3,422.71,4,330.18) | -0.01(-0.01,0.00)  | 514.43(363.57,687.67)                   | 979.39(690.10,1,307.09)                 | -0.03(-0.04,-0.02) |
| Andorra                          | 2,931.91(2,557.31,3,341.54)             | 2,770.49(2,428.05,3,139.11) | -0.01(-0.02,0.01)  | 1,164.78(809.61,1,587.07)               | 1,038.73(724.82,1,423.10)               | -0.1(-0.11,-0.08)  |
| Angola                           | 557,122.86(483,950.15,637,857.06)       | 2,863.51(2,525.77,3,251.39) | -0.03(-0.04,-0.03) | 141,489.59(99,470.64,190,546.67)        | 751.44(529.22,1,006.04)                 | -0.02(-0.02,-0.01) |
| Antigua and Barbuda              | 2,745.05(2,413.53,3,135.52)             | 2,720.99(2,402.38,3,084.44) | -0.04(-0.05,-0.04) | 726.24(506.91,978.97)                   | 713.01(500.07,955.74)                   | -0.06(-0.07,-0.05) |
| Argentina                        | 1,165,772.86(1,021,129.24,1,329,341.74) | 2,393.08(2,089.79,2,725.79) | -0.01(-0.02,0.01)  | 390,169.05(272,744.42,529,541.99)       | 791.93(551.83,1,073.57)                 | -0.07(-0.08,-0.06) |
| Armenia                          | 120,087.38(106,099.43,135,986.33)       | 3,348.04(2,968.72,3,786.60) | -0.02(-0.03,-0.02) | 32,970.07(23,553.72,44,381.19)          | 908.58(643.01,1,220.15)                 | 0(-0.01,0)         |
| Australia                        | 796,532.20(698,694.03,904,485.30)       | 2,723.99(2,384.08,3,095.56) | -0.18(-0.2,-0.16)  | 298,624.33(209,363.52,402,395.10)       | 986.56(685.32,1,334.14)                 | -0.42(-0.45,-0.38) |
| Austria                          | 288,856.18(253,261.76,328,518.21)       | 2,529.10(2,210.82,2,875.96) | -0.15(-0.19,-0.12) | 105,627.16(75,640.61,142,806.99)        | 874.79(618.61,1,184.30)                 | -0.35(-0.37,-0.33) |
| Azerbaijan                       | 341,777.56(298,651.36,392,073.70)       | 3,160.86(2,792.18,3,581.32) | 0.00(0.00,0.01)    | 90,863.16(63,207.03,123,410.88)         | 836.71(586.07,1,129.28)                 | 0.01(0,0.02)       |
| Bahamas                          | 11,256.52(9,853.17,12,828.75)           | 2,721.54(2,389.22,3,092.43) | -0.07(-0.08,-0.06) | 2,973.35(2,089.56,4,006.41)             | 714.41(502.53,962.45)                   | -0.08(-0.09,-0.07) |
| Bahrain                          | 51,265.09(43,818.11,59,720.79)          | 3,082.56(2,707.65,3,503.97) | -0.03(-0.04,-0.03) | 13,741.79(9,477.10,18,768.91)           | 808.87(568.92,1,083.63)                 | -0.04(-0.06,-0.03) |
| Bangladesh                       | 4,307,843.43(3,794,696.42,4,886,974.72) | 2,858.23(2,520.53,3,237.56) | -0.22(-0.23,-0.21) | 1,142,791.68(805,696.99,1,530,930.72)   | 761.02(536.28,1,022.91)                 | -0.26(-0.28,-0.25) |
| Barbados                         | 10,332.16(9,127.39,11,793.40)           | 2,742.61(2,407.80,3,126.91) | -0.04(-0.04,-0.03) | 2,758.06(1,927.39,3,705.58)             | 722.87(505.21,963.05)                   | -0.05(-0.05,-0.04) |
| Belarus                          | 450,470.90(399,088.95,513,132.54)       | 3,660.82(3,237.43,4,136.45) | -0.03(-0.04,-0.02) | 124,257.72(87,956.29,166,211.96)        | 992.12(702.88,1,325.31)                 | -0.02(-0.03,-0.02) |
| Belgium                          | 393,941.29(347,786.37,447,216.75)       | 2,799.34(2,469.23,3,167.20) | -0.02(-0.07,0.03)  | 154,724.73(109,530.28,207,045.34)       | 1,043.62(734.22,1,407.39)               | -0.11(-0.12,-0.1)  |
| Belize                           | 10,350.21(9,050.05,11,818.54)           | 2,769.13(2,442.15,3,145.13) | -0.03(-0.03,-0.02) | 2,719.13(1,909.67,3,620.79)             | 733.44(515.27,982.16)                   | -0.03(-0.05,-0.01) |
| Benin                            | 238,300.94(207,499.22,272,098.16)       | 2,857.22(2,527.32,3,235.79) | -0.01(-0.01,0)     | 61,224.80(42,988.26,82,276.95)          | 755.45(532.97,1,014.34)                 | 0.02(0.01,0.02)    |
| Bermuda                          | 2,435.56(2,148.37,2,783.12)             | 2,769.05(2,431.93,3,141.97) | -0.06(-0.06,-0.05) | 657.97(466.30,886.25)                   | 735.09(514.16,987.14)                   | -0.06(-0.07,-0.06) |
| Bhutan                           | 20,049.06(17,635.49,22,887.75)          | 2,869.05(2,537.67,3,249.31) | -0.06(-0.07,-0.06) | 5,340.54(3,750.26,7,158.33)             | 766.64(541.28,1,037.86)                 | -0.04(-0.06,-0.03) |
| Bolivia (Plurinational State of) | 287,382.46(252,523.76,326,926.66)       | 2,677.54(2,355.04,3,028.44) | -0.06(-0.06,-0.05) | 75,174.22(52,502.97,100,384.21)         | 704.00(492.32,941.38)                   | -0.04(-0.06,-0.03) |
| Bosnia and Herzegovina           | 163,977.61(145,144.91,187,174.50)       | 3,793.67(3,352.83,4,289.48) | 0.03(0.02,0.05)    | 44,681.49(31,591.25,60,102.86)          | 1,014.97(714.29,1,356.96)               | 0.06(0.05,0.07)    |
| Botswana                         | 50,105.55(43,880.75,57,626.07)          | 2,539.45(2,243.21,2,882.84) | -0.06(-0.07,-0.04) | 12,695.95(8,915.52,17,094.33)           | 647.71(460.39,868.32)                   | -0.08(-0.08,-0.07) |
| Brazil                           | 7,631,690.28(6,709,900.98,8,648,467.77) | 3,242.47(2,859.43,3,665.58) | 0.01(0.00,0.02)    | 2,044,102.33(1,441,813.54,2,715,670.05) | 861.51(607.16,1,146.40)                 | 0.04(0.03,0.05)    |
| Brunei Darussalam                | 12,058.44(10,462.13,13,916.35)          | 2,675.12(2,343.90,3,033.82) | 0.02(-0.03,0.06)   | 4,364.16(3,002.77,5,981.58)             | 966.82(672.30,1,317.15)                 | -0.02(-0.03,-0.01) |
| Bulgaria                         | 382,244.33(337,709.61,433,890.99)       | 4,077.27(3,620.81,4,647.12) | -0.04(-0.04,-0.03) | 108,064.32(76,756.77,145,840.38)        | 1,130.09(789.96,1,518.70)               | -0.03(-0.03,-0.02) |
| Burkina Faso                     | 428,057.75(373,947.23,489,261.09)       | 2,830.44(2,496.74,3,187.16) | 0.05(0.04,0.06)    | 109,607.64(77,032.42,148,089.00)        | 746.30(526.11,1,002.42)                 | 0.1(0.09,0.11)     |
| Burundi                          | 210,592.45(182,913.12,239,769.18)       | 2,767.87(2,451.35,3,138.90) | 0.05(0.04,0.07)    | 53,420.85(37,701.97,71,174.13)          | 724.85(514.43,975.46)                   | 0.08(0.07,0.09)    |
| Cabo Verde                       | 14,396.31(12,672.65,16,432.39)          | 2,776.92(2,447.85,3,149.30) | -0.01(-0.02,-0.01) | 3,771.93(2,629.06,5,012.01)             | 730.61(512.84,975.04)                   | -0.02(-0.04,-0.01) |
| Cambodia                         | 534,408.20(471,611.54,606,369.28)       | 3,596.19(3,197.66,4,072.36) | -0.2(-0.22,-0.19)  | 138,271.46(95,377.98,184,505.40)        | 930.58(647.10,1,239.65)                 | -0.23(-0.25,-0.22) |
| Cameroon                         | 604,298.31(526,117.79,688,318.73)       | 2,946.96(2,593.39,3,341.13) | -0.03(-0.04,-0.02) | 156,964.77(110,113.13,211,268.67)       | 784.92(550.13,1,051.23)                 | -0.03(-0.04,-0.01) |
| Canada                           | 1,233,474.64(1,082,727.78,1,400,023.78) | 2,710.70(2,374.73,3,066.83) | 0.26(0.1,0.43)     | 476,173.05(335,648.76,641,763.23)       | 1,003.84(697.40,1,358.84)               | 0.31(0.17,0.46)    |
| Central African Republic         | 104,867.20(91,196.69,119,989.88)        | 2,887.41(2,537.84,3,276.60) | -0.01(-0.01,-0.01) | 26,665.98(18,702.82,35,920.30)          | 753.52(534.19,1,015.81)                 | 0.01(0,0.02)       |
| Chad                             | 298,243.09(259,648.97,341,691.01)       | 2,990.69(2,651.90,3,379.57) | -0.01(-0.02,0)     | 76,847.32(54,136.42,104,458.52)         | 801.20(568.48,1,083.95)                 | -0.01(-0.02,0.01)  |
| Chile                            | 496,800.70(435,002.97,570,421.30)       | 2,378.95(2,066.89,2,712.05) | 0.01(0,0.02)       | 166,912.76(115,673.97,226,315.97)       | 782.93(544.71,1,064.40)                 | -0.03(-0.04,-0.02) |

|                                              |                                            |                             |                    |                                           |                           |                    |
|----------------------------------------------|--------------------------------------------|-----------------------------|--------------------|-------------------------------------------|---------------------------|--------------------|
| <b>China</b>                                 | 40,158,356.95(35,369,447.69,45,809,146.32) | 2,280.67(2,017.18,2,572.62) | -1.16(-1.23,-1.08) | 10,334,104.36(7,329,879.14,14,004,811.71) | 579.05(411.61,778.10)     | -1.2(-1.28,-1.12)  |
| <b>Colombia</b>                              | 1,630,741.91(1,442,304.04,1,848,789.92)    | 3,192.39(2,827.64,3,616.83) | 0.02(0.02,0.03)    | 454,710.42(317,352.20,609,186.22)         | 885.14(618.18,1,187.15)   | 0.07(0.06,0.09)    |
| <b>Comoros</b>                               | 17,135.24(15,039.17,19,537.02)             | 2,814.26(2,491.27,3,196.60) | 0.02(0.01,0.04)    | 4,519.62(3,170.17,6,076.24)               | 749.89(530.25,996.89)     | 0.07(0.06,0.09)    |
| <b>Congo</b>                                 | 114,429.89(100,180.60,131,313.95)          | 2,822.37(2,498.69,3,193.11) | -0.02(-0.03,-0.01) | 29,330.28(20,291.93,39,387.22)            | 735.82(520.26,993.02)     | 0(-0.01,0.01)      |
| <b>Cook Islands</b>                          | 803.96(714.50,908.32)                      | 3,841.17(3,413.96,4,324.33) | 0(-0.01,0.01)      | 206.76(147.38,273.34)                     | 985.41(697.35,1,314.06)   | -0.01(-0.02,0)     |
| <b>Costa Rica</b>                            | 146,400.82(129,161.89,166,424.46)          | 2,872.69(2,533.41,3,257.43) | -0.09(-0.1,-0.08)  | 39,073.78(27,283.37,52,856.39)            | 761.55(532.33,1,028.92)   | -0.11(-0.12,-0.1)  |
| <b>Croatia</b>                               | 231,826.69(205,231.68,262,408.68)          | 4,089.50(3,602.05,4,608.56) | -0.13(-0.15,-0.11) | 65,105.65(45,754.72,88,041.65)            | 1,129.08(791.68,1,521.46) | -0.18(-0.21,-0.14) |
| <b>Cuba</b>                                  | 410,683.37(368,610.95,457,067.76)          | 2,818.43(2,521.05,3,136.02) | -0.12(-0.13,-0.1)  | 111,531.04(79,721.49,149,153.00)          | 753.07(539.46,1,003.73)   | -0.15(-0.17,-0.13) |
| <b>Cyprus</b>                                | 44,543.07(39,103.54,50,713.51)             | 2,854.19(2,510.80,3,223.26) | 0.03(0.01,0.04)    | 17,937.63(12,600.07,24,327.15)            | 1,100.86(774.01,1,497.16) | 0(-0.01,0.01)      |
| <b>Czechia</b>                               | 570,645.41(503,445.21,648,302.26)          | 4,075.61(3,612.97,4,605.00) | -0.08(-0.08,-0.07) | 160,129.63(113,773.31,215,853.75)         | 1,125.00(784.83,1,522.15) | -0.07(-0.09,-0.05) |
| <b>Côte d'Ivoire</b>                         | 531,447.89(462,721.08,612,080.67)          | 2,851.83(2,524.29,3,230.87) | 0.04(0.04,0.05)    | 136,718.42(95,525.16,184,072.84)          | 750.09(532.56,1,007.27)   | 0.11(0.09,0.12)    |
| <b>Democratic People's Republic of Korea</b> | 988,042.54(872,824.64,1,123,533.28)        | 3,256.10(2,889.47,3,675.82) | -0.2(-0.2,-0.19)   | 256,843.68(181,228.60,341,309.74)         | 837.89(591.45,1,104.19)   | -0.19(-0.2,-0.18)  |
| <b>Democratic Republic of the Congo</b>      | 1,694,839.60(1,478,578.50,1,942,679.48)    | 2,855.10(2,530.18,3,235.81) | -0.04(-0.06,-0.02) | 429,801.62(301,251.27,579,269.05)         | 744.77(523.97,1,003.76)   | -0.01(-0.02,-0.01) |
| <b>Denmark</b>                               | 183,946.29(157,686.81,216,998.57)          | 2,572.24(2,215.43,2,968.09) | -0.05(-0.07,-0.03) | 94,669.92(66,888.61,127,328.04)           | 1,248.54(878.34,1,682.13) | -0.14(-0.17,-0.11) |
| <b>Djibouti</b>                              | 24,843.93(21,607.32,28,624.64)             | 2,626.97(2,321.58,2,995.76) | -0.04(-0.05,-0.03) | 6,382.56(4,417.68,8,607.08)               | 683.28(478.10,923.04)     | -0.03(-0.05,-0.02) |
| <b>Dominica</b>                              | 2,144.30(1,890.43,2,428.35)                | 2,738.98(2,409.00,3,107.63) | -0.09(-0.1,-0.09)  | 566.97(400.13,755.64)                     | 719.65(508.48,964.84)     | -0.12(-0.13,-0.11) |
| <b>Dominican Republic</b>                    | 281,672.18(247,704.66,320,192.13)          | 2,675.93(2,355.95,3,031.76) | 0.06(0.06,0.07)    | 73,563.27(51,487.62,98,967.03)            | 699.32(489.49,940.05)     | 0.08(0.05,0.1)     |
| <b>Ecuador</b>                               | 417,010.53(373,427.49,463,971.90)          | 2,470.52(2,218.62,2,744.10) | -0.14(-0.16,-0.12) | 106,956.08(75,697.95,142,068.94)          | 634.85(450.36,842.92)     | -0.19(-0.2,-0.17)  |
| <b>Egypt</b>                                 | 2,738,367.95(2,402,635.87,3,135,984.39)    | 3,155.71(2,789.93,3,568.52) | 0.04(0.04,0.05)    | 724,668.40(504,743.96,974,423.94)         | 842.94(590.66,1,130.06)   | 0.07(0.06,0.09)    |
| <b>El Salvador</b>                           | 182,160.40(160,718.00,206,783.42)          | 2,949.18(2,604.66,3,354.47) | 0.04(0.03,0.04)    | 48,215.06(33,802.56,64,765.65)            | 782.00(552.09,1,054.20)   | 0.06(0.05,0.07)    |
| <b>Equatorial Guinea</b>                     | 26,523.06(22,845.48,30,350.91)             | 2,808.71(2,476.48,3,167.06) | -0.09(-0.1,-0.08)  | 6,685.58(4,689.84,8,991.21)               | 729.21(515.06,977.18)     | -0.07(-0.09,-0.06) |
| <b>Eritrea</b>                               | 115,482.04(99,599.81,132,866.17)           | 2,504.73(2,200.19,2,847.65) | 0.12(0.11,0.12)    | 28,731.05(20,078.34,38,645.42)            | 636.16(448.98,852.07)     | 0.17(0.16,0.19)    |
| <b>Estonia</b>                               | 63,050.29(55,936.97,71,492.99)             | 3,537.78(3,135.02,3,997.22) | -0.02(-0.02,-0.01) | 17,158.78(12,188.35,22,966.74)            | 944.68(665.07,1,274.12)   | 0.01(-0.01,0.02)   |
| <b>Eswatini</b>                              | 20,910.63(18,261.94,23,918.53)             | 2,450.68(2,154.71,2,778.39) | -0.07(-0.1,-0.04)  | 5,174.74(3,638.77,6,888.48)               | 614.68(439.82,825.12)     | -0.13(-0.14,-0.11) |
| <b>Ethiopia</b>                              | 1,845,491.24(1,606,008.54,2,112,834.13)    | 2,673.52(2,364.07,3,043.93) | -0.09(-0.11,-0.06) | 469,908.18(326,669.07,624,485.96)         | 700.06(491.31,935.19)     | -0.06(-0.08,-0.03) |
| <b>Fiji</b>                                  | 32,973.27(29,022.40,37,656.33)             | 3,809.06(3,365.95,4,313.78) | -0.06(-0.07,-0.05) | 8,403.26(5,990.09,11,214.70)              | 967.91(689.28,1,291.15)   | -0.1(-0.11,-0.1)   |
| <b>Finland</b>                               | 185,607.93(162,853.94,210,464.88)          | 2,624.04(2,296.73,2,954.41) | -0.07(-0.1,-0.04)  | 69,408.24(49,658.20,94,461.96)            | 930.21(651.98,1,250.37)   | -0.17(-0.19,-0.16) |
| <b>France</b>                                | 2,301,282.14(2,029,674.24,2,603,827.57)    | 2,838.49(2,500.05,3,196.99) | 0.03(0.01,0.05)    | 927,416.15(653,330.11,1,259,722.68)       | 1,085.59(755.28,1,464.37) | 0(-0.01,0.01)      |
| <b>Gabon</b>                                 | 40,509.54(35,503.98,46,353.68)             | 2,802.20(2,470.96,3,184.14) | 0(-0.02,0.01)      | 10,419.38(7,257.31,13,927.89)             | 728.71(511.17,977.32)     | 0(-0.01,0.01)      |
| <b>Gambia</b>                                | 43,157.34(37,480.82,49,239.91)             | 2,747.75(2,420.71,3,108.53) | -0.02(-0.03,0)     | 10,967.63(7,672.40,14,875.89)             | 714.31(503.41,961.88)     | -0.04(-0.05,-0.02) |
| <b>Georgia</b>                               | 137,699.54(122,075.26,156,632.41)          | 2,973.43(2,614.48,3,377.53) | 0.02(0.01,0.04)    | 35,985.18(25,553.00,48,360.05)            | 767.98(544.02,1,030.40)   | 0.02(0,0.04)       |
| <b>Germany</b>                               | 3,226,524.26(2,841,666.78,3,661,208.26)    | 2,980.56(2,620.07,3,371.43) | -0.03(-0.05,-0.02) | 1,352,408.39(944,971.32,1,805,632.52)     | 1,168.98(810.60,1,566.97) | -0.13(-0.15,-0.11) |
| <b>Ghana</b>                                 | 600,477.53(528,671.68,679,452.12)          | 2,448.10(2,178.80,2,740.07) | -0.07(-0.09,-0.05) | 150,061.06(106,454.06,201,410.44)         | 618.97(438.21,831.69)     | -0.07(-0.11,-0.04) |
| <b>Greece</b>                                | 365,188.03(320,546.94,414,544.88)          | 2,714.68(2,371.48,3,090.64) | 0.01(-0.03,0.05)   | 142,958.24(100,300.61,194,711.62)         | 998.49(695.20,1,356.85)   | -0.02(-0.04,0)     |
| <b>Greenland</b>                             | 1,851.05(1,613.56,2,106.98)                | 2,930.15(2,566.62,3,318.03) | -0.1(-0.11,-0.08)  | 751.76(527.34,1,009.60)                   | 1,152.32(811.76,1,547.75) | -0.22(-0.22,-0.21) |
| <b>Grenada</b>                               | 3,071.14(2,695.42,3,501.35)                | 2,733.41(2,401.77,3,099.58) | -0.09(-0.1,-0.09)  | 811.88(570.90,1,088.39)                   | 718.27(505.04,960.63)     | -0.11(-0.12,-0.11) |
| <b>Guam</b>                                  | 6,784.84(6,030.77,7,668.60)                | 3,771.47(3,348.12,4,251.26) | 0(-0.01,0.01)      | 1,750.46(1,235.53,2,333.97)               | 970.16(684.94,1,287.66)   | -0.01(-0.02,0)     |
| <b>Guatemala</b>                             | 466,100.31(406,346.04,531,405.61)          | 3,008.93(2,659.05,3,388.50) | -0.01(-0.02,0)     | 122,813.54(85,276.91,165,256.45)          | 800.94(562.46,1,067.17)   | 0.02(0.01,0.03)    |

|                                         |                                            |                             |                    |                                          |                           |                    |
|-----------------------------------------|--------------------------------------------|-----------------------------|--------------------|------------------------------------------|---------------------------|--------------------|
| <b>Guinea</b>                           | 243,173.61(212,650.61,276,982.69)          | 2,836.99(2,504.29,3,234.61) | 0.02(0.02,0.03)    | 62,333.02(43,928.09,84,010.57)           | 748.30(531.11,1,004.19)   | 0.05(0.04,0.06)    |
| <b>Guinea-Bissau</b>                    | 36,003.50(31,290.47,41,215.27)             | 2,774.00(2,446.70,3,148.39) | -0.01(-0.01,0)     | 9,177.80(6,352.97,12,318.80)             | 725.13(510.80,964.85)     | 0(0,0.01)          |
| <b>Guyana</b>                           | 20,468.15(17,943.60,23,409.43)             | 2,748.71(2,426.18,3,120.79) | -0.04(-0.05,-0.03) | 5,314.52(3,752.83,7,133.85)              | 714.25(505.36,953.74)     | -0.04(-0.05,-0.03) |
| <b>Haiti</b>                            | 289,471.15(252,895.52,331,111.39)          | 2,770.61(2,438.44,3,145.15) | -0.01(-0.02,0)     | 74,694.32(51,689.62,100,002.32)          | 723.10(512.98,967.03)     | -0.01(-0.02,0)     |
| <b>Honduras</b>                         | 251,564.11(219,329.67,288,022.62)          | 2,955.28(2,595.97,3,353.76) | 0(-0.01,0)         | 66,548.04(46,395.24,89,642.88)           | 790.30(548.93,1,068.77)   | 0.02(0.01,0.03)    |
| <b>Hungary</b>                          | 528,781.02(469,002.88,599,707.39)          | 4,107.21(3,649.54,4,625.92) | 0.08(0.07,0.08)    | 150,027.08(106,405.99,201,774.65)        | 1,142.13(797.96,1,543.09) | 0.15(0.14,0.17)    |
| <b>Iceland</b>                          | 11,356.17(9,965.12,12,882.07)              | 2,832.28(2,480.27,3,225.34) | -0.14(-0.16,-0.12) | 4,491.09(3,153.35,6,074.17)              | 1,078.31(753.44,1,459.83) | -0.33(-0.34,-0.32) |
| <b>India</b>                            | 29,625,621.09(26,011,120.94,33,743,475.91) | 2,268.60(1,998.28,2,574.65) | -0.95(-1.01,-0.89) | 7,504,141.56(5,315,995.81,10,033,075.50) | 575.01(407.53,773.42)     | -1.06(-1.13,-1)    |
| <b>Indonesia</b>                        | 9,234,621.89(8,117,808.44,10,516,756.78)   | 3,575.98(3,172.39,4,034.52) | -0.24(-0.26,-0.22) | 2,434,086.39(1,707,306.90,3,256,770.18)  | 936.01(657.51,1,246.56)   | -0.2(-0.22,-0.19)  |
| <b>Iran (Islamic Republic of)</b>       | 3,050,709.48(2,686,650.20,3,487,116.35)    | 3,492.98(3,092.55,3,949.54) | -0.3(-0.33,-0.26)  | 837,778.62(583,888.00,1,128,833.77)      | 951.92(668.92,1,275.17)   | -0.34(-0.41,-0.28) |
| <b>Iraq</b>                             | 1,079,909.42(949,881.57,1,240,335.86)      | 3,058.30(2,709.35,3,476.33) | -0.09(-0.1,-0.09)  | 279,601.19(193,899.45,377,242.67)        | 802.31(560.86,1,078.32)   | -0.09(-0.1,-0.09)  |
| <b>Ireland</b>                          | 165,531.91(145,498.74,187,453.96)          | 2,923.48(2,567.89,3,326.49) | 0(-0.02,0.01)      | 67,591.45(47,530.58,91,195.92)           | 1,145.71(802.03,1,543.36) | -0.07(-0.09,-0.05) |
| <b>Israel</b>                           | 271,895.38(239,126.45,306,401.15)          | 2,828.50(2,484.61,3,200.87) | -0.01(-0.03,0.02)  | 104,356.37(73,223.17,140,471.54)         | 1,070.39(748.60,1,440.61) | -0.1(-0.11,-0.09)  |
| <b>Italy</b>                            | 2,487,894.09(2,186,301.07,2,827,095.31)    | 3,112.64(2,730.23,3,519.07) | -0.05(-0.08,-0.02) | 912,014.87(643,684.15,1,232,233.72)      | 1,078.09(748.99,1,460.84) | -0.15(-0.17,-0.13) |
| <b>Jamaica</b>                          | 83,800.68(73,840.97,95,494.05)             | 2,796.26(2,462.37,3,192.45) | -0.03(-0.04,-0.03) | 22,313.45(15,737.14,29,747.57)           | 741.41(523.57,992.73)     | -0.04(-0.05,-0.04) |
| <b>Japan</b>                            | 5,520,721.51(4,858,046.79,6,269,887.36)    | 3,172.86(2,772.97,3,590.01) | -0.2(-0.25,-0.15)  | 2,108,843.40(1,494,752.40,2,860,549.02)  | 1,134.29(789.27,1,537.99) | -0.43(-0.47,-0.39) |
| <b>Jordan</b>                           | 312,023.52(271,793.21,358,356.11)          | 3,094.64(2,725.90,3,511.31) | -0.04(-0.04,-0.03) | 81,779.37(56,682.35,108,984.65)          | 819.77(570.51,1,091.22)   | -0.04(-0.04,-0.03) |
| <b>Kazakhstan</b>                       | 600,890.89(532,942.73,682,777.12)          | 3,232.34(2,875.60,3,654.17) | -0.06(-0.07,-0.06) | 159,502.05(112,565.56,214,299.95)        | 856.68(606.81,1,151.53)   | -0.07(-0.08,-0.06) |
| <b>Kenya</b>                            | 998,193.48(869,463.63,1,140,469.18)        | 2,812.67(2,491.60,3,190.83) | -0.04(-0.05,-0.03) | 255,500.70(179,017.78,339,534.55)        | 734.45(517.96,982.28)     | -0.02(-0.03,-0.01) |
| <b>Kiribati</b>                         | 3,825.58(3,366.43,4,354.88)                | 3,968.44(3,538.44,4,467.66) | 0.12(0.1,0.13)     | 980.79(690.04,1,308.87)                  | 1,024.17(718.98,1,362.93) | 0.16(0.15,0.17)    |
| <b>Kuwait</b>                           | 147,166.77(126,464.61,171,814.29)          | 3,140.29(2,778.55,3,552.84) | -0.01(-0.01,0)     | 39,638.68(26,977.97,53,817.00)           | 835.65(589.30,1,121.03)   | 0(-0.02,0.01)      |
| <b>Kyrgyzstan</b>                       | 180,485.26(158,452.34,204,980.91)          | 3,123.88(2,754.44,3,527.10) | -0.07(-0.08,-0.06) | 47,292.53(33,334.03,63,269.27)           | 824.58(586.27,1,106.83)   | -0.08(-0.09,-0.07) |
| <b>Lao People's Democratic Republic</b> | 211,094.42(186,033.51,240,583.94)          | 3,465.52(3,082.69,3,909.46) | -0.06(-0.07,-0.05) | 54,216.52(37,804.65,72,387.85)           | 891.94(627.21,1,183.89)   | -0.04(-0.05,-0.02) |
| <b>Latvia</b>                           | 96,329.30(85,356.25,109,172.14)            | 3,633.44(3,227.46,4,107.42) | -0.01(-0.01,0)     | 26,600.98(18,916.02,35,720.36)           | 981.38(693.65,1,320.36)   | 0.02(0.01,0.03)    |
| <b>Lebanon</b>                          | 150,707.83(132,418.64,171,751.01)          | 2,830.32(2,484.60,3,214.28) | -0.04(-0.04,-0.03) | 38,867.48(27,267.08,52,121.39)           | 727.22(511.52,966.04)     | -0.03(-0.04,-0.02) |
| <b>Lesotho</b>                          | 42,557.97(37,094.70,48,552.18)             | 2,485.97(2,198.07,2,830.21) | -0.12(-0.13,-0.11) | 10,661.92(7,543.23,14,223.91)            | 628.32(445.76,838.66)     | -0.17(-0.2,-0.14)  |
| <b>Liberia</b>                          | 97,809.34(84,893.63,112,463.23)            | 2,776.20(2,445.51,3,134.69) | -0.02(-0.02,-0.01) | 24,774.89(17,343.40,33,125.50)           | 716.06(507.21,957.85)     | -0.02(-0.03,0)     |
| <b>Libya</b>                            | 210,984.85(183,586.05,243,607.58)          | 3,041.97(2,684.58,3,459.01) | -0.07(-0.08,-0.07) | 55,476.05(38,325.63,75,269.63)           | 796.31(558.85,1,069.21)   | -0.11(-0.12,-0.1)  |
| <b>Lithuania</b>                        | 140,606.25(124,831.74,159,766.30)          | 3,646.50(3,232.39,4,112.41) | -0.09(-0.09,-0.08) | 38,853.59(27,645.36,52,059.94)           | 984.94(695.63,1,328.98)   | -0.1(-0.12,-0.09)  |
| <b>Luxembourg</b>                       | 21,165.35(18,473.99,24,120.37)             | 2,832.96(2,478.61,3,210.10) | -0.03(-0.06,0.01)  | 8,492.76(6,005.57,11,390.66)             | 1,082.96(759.79,1,454.00) | -0.11(-0.12,-0.11) |
| <b>Madagascar</b>                       | 500,686.30(434,821.02,575,211.55)          | 2,741.20(2,411.69,3,135.79) | -0.17(-0.18,-0.17) | 128,415.39(89,304.25,172,439.11)         | 721.58(508.14,975.63)     | -0.19(-0.2,-0.18)  |
| <b>Malawi</b>                           | 323,991.89(281,374.84,371,848.14)          | 2,691.20(2,364.28,3,061.30) | -0.12(-0.13,-0.12) | 81,971.54(57,130.66,110,202.77)          | 702.48(492.19,944.72)     | -0.12(-0.13,-0.12) |
| <b>Malaysia</b>                         | 1,040,641.12(917,613.00,1,183,356.62)      | 3,371.55(2,991.28,3,810.94) | -0.07(-0.11,-0.02) | 268,169.42(189,531.28,355,212.08)        | 864.24(611.47,1,147.30)   | -0.06(-0.08,-0.03) |
| <b>Maldives</b>                         | 15,064.93(13,108.80,17,453.17)             | 3,168.74(2,816.18,3,572.25) | -0.1(-0.1,-0.09)   | 3,845.70(2,637.60,5,202.29)              | 800.60(558.72,1,065.69)   | -0.07(-0.09,-0.06) |
| <b>Mali</b>                             | 364,273.60(318,756.94,417,070.39)          | 2,589.67(2,291.21,2,934.25) | 0.15(0.14,0.16)    | 90,903.40(64,192.22,122,765.21)          | 664.95(468.30,888.11)     | 0.22(0.2,0.23)     |
| <b>Malta</b>                            | 16,586.21(14,627.18,18,842.08)             | 2,974.23(2,617.07,3,366.03) | 0.02(-0.02,0.05)   | 7,105.55(5,024.85,9,599.59)              | 1,187.58(830.09,1,607.27) | -0.02(-0.04,0)     |
| <b>Marshall Islands</b>                 | 1,815.65(1,592.80,2,070.01)                | 3,735.85(3,324.55,4,210.86) | -0.08(-0.09,-0.07) | 458.58(323.23,609.79)                    | 944.44(669.38,1,252.26)   | -0.12(-0.12,-0.11) |
| <b>Mauritania</b>                       | 83,849.08(73,218.09,95,946.18)             | 2,790.88(2,462.78,3,165.08) | 0.01(0,0.03)       | 21,597.26(15,074.59,29,247.85)           | 734.65(514.56,995.43)     | 0.03(0.01,0.04)    |
| <b>Mauritius</b>                        | 50,017.82(44,046.97,56,734.07)             | 3,208.38(2,829.87,3,612.93) | 0(-0.01,0)         | 12,619.71(8,949.35,16,981.89)            | 801.10(563.30,1,075.88)   | 0(-0.01,0.02)      |



|                                         |                                         |                             |                    |                                         |                           |                    |
|-----------------------------------------|-----------------------------------------|-----------------------------|--------------------|-----------------------------------------|---------------------------|--------------------|
| <b>Mexico</b>                           | 3,491,462.68(3,057,931.37,3,987,524.01) | 2,736.35(2,395.00,3,123.41) | 0.01(-0.03,0.05)   | 922,619.77(650,633.84,1,231,349.46)     | 721.18(508.67,962.01)     | 0.01(-0.08,0.09)   |
| <b>Micronesia (Federated States of)</b> | 3,450.51(3,035.40,3,919.16)             | 3,816.46(3,394.00,4,289.41) | -0.02(-0.02,-0.01) | 882.82(621.23,1,177.73)                 | 978.42(687.24,1,301.47)   | -0.02(-0.03,-0.01) |
| <b>Monaco</b>                           | 1,397.66(1,227.09,1,593.43)             | 2,782.84(2,441.63,3,164.69) | -0.04(-0.05,-0.02) | 561.31(394.63,759.37)                   | 1,039.18(723.70,1,407.45) | -0.16(-0.17,-0.15) |
| <b>Mongolia</b>                         | 97,809.21(85,044.28,112,493.37)         | 3,121.94(2,755.48,3,536.23) | -0.12(-0.14,-0.11) | 25,600.91(17,938.15,34,627.12)          | 820.63(578.54,1,100.29)   | -0.16(-0.17,-0.15) |
| <b>Montenegro</b>                       | 30,722.26(27,160.42,35,046.55)          | 4,023.53(3,544.21,4,572.29) | -0.05(-0.06,-0.04) | 8,578.56(6,051.37,11,590.95)            | 1,106.00(778.97,1,482.51) | -0.05(-0.06,-0.04) |
| <b>Morocco</b>                          | 1,165,370.59(1,027,187.54,1,327,665.99) | 3,230.53(2,860.06,3,658.14) | 0.04(0.04,0.05)    | 313,322.48(220,855.74,423,475.28)       | 867.98(610.07,1,166.97)   | 0.07(0.05,0.09)    |
| <b>Mozambique</b>                       | 514,693.20(449,901.18,589,427.55)       | 2,816.37(2,488.76,3,195.40) | 0.02(0.02,0.02)    | 130,553.79(91,422.85,175,532.05)        | 739.41(524.16,991.97)     | 0.04(0.02,0.06)    |
| <b>Myanmar</b>                          | 1,689,059.61(1,492,550.68,1,925,546.30) | 3,197.77(2,844.61,3,623.96) | 0.06(0.04,0.09)    | 425,925.81(300,381.95,571,207.32)       | 802.91(570.32,1,077.07)   | 0.12(0.1,0.14)     |
| <b>Namibia</b>                          | 50,189.69(44,008.87,57,287.86)          | 2,640.98(2,338.57,2,997.09) | -0.01(-0.02,0)     | 12,845.29(8,972.54,17,220.22)           | 684.41(481.36,920.06)     | 0(-0.01,0.01)      |
| <b>Nauru</b>                            | 303.16(264.70,348.28)                   | 3,872.88(3,454.25,4,378.97) | 0.02(0.01,0.02)    | 77.38(53.85,103.63)                     | 996.23(709.87,1,324.78)   | 0.01(0,0.02)       |
| <b>Nepal</b>                            | 846,613.66(742,645.66,960,559.68)       | 3,135.17(2,767.91,3,544.36) | -0.05(-0.07,-0.04) | 230,665.82(162,584.35,310,378.94)       | 860.75(612.81,1,149.95)   | -0.02(-0.04,-0.01) |
| <b>Netherlands</b>                      | 568,295.15(497,155.44,647,105.09)       | 2,635.11(2,308.28,2,979.37) | -0.03(-0.04,-0.01) | 215,269.02(151,463.76,292,917.86)       | 948.65(658.59,1,285.86)   | -0.1(-0.12,-0.09)  |
| <b>New Zealand</b>                      | 160,802.57(140,417.40,182,595.53)       | 2,997.30(2,600.32,3,415.72) | -0.11(-0.13,-0.08) | 55,183.75(38,722.48,74,262.33)          | 998.64(693.71,1,354.12)   | -0.21(-0.23,-0.2)  |
| <b>Nicaragua</b>                        | 174,299.84(152,913.13,198,912.13)       | 2,924.34(2,574.94,3,324.01) | -0.11(-0.11,-0.1)  | 46,263.51(32,256.81,61,985.70)          | 779.95(548.68,1,044.55)   | -0.11(-0.11,-0.1)  |
| <b>Niger</b>                            | 388,795.79(337,514.42,445,199.34)       | 2,808.11(2,483.53,3,186.56) | 0.02(0.01,0.02)    | 98,455.04(69,335.08,132,715.42)         | 740.03(521.68,987.92)     | 0.03(0.03,0.04)    |
| <b>Nigeria</b>                          | 4,814,246.54(4,198,936.32,5,506,041.41) | 3,238.47(2,865.42,3,654.51) | 0.03(0.01,0.04)    | 1,273,516.26(897,845.02,1,710,670.85)   | 881.15(619.21,1,184.69)   | 0.03(0.02,0.04)    |
| <b>Niue</b>                             | 73.00(64.72,82.37)                      | 3,841.91(3,397.92,4,327.73) | -0.04(-0.05,-0.04) | 18.71(13.24,24.84)                      | 982.03(689.28,1,310.02)   | -0.06(-0.07,-0.06) |
| <b>North Macedonia</b>                  | 100,944.95(89,074.61,115,077.21)        | 3,780.44(3,345.16,4,284.93) | -0.04(-0.06,-0.03) | 27,486.55(19,366.02,36,895.72)          | 1,012.46(710.54,1,358.46) | -0.05(-0.06,-0.03) |
| <b>Northern Mariana Islands</b>         | 1,910.01(1,678.65,2,196.00)             | 3,758.31(3,343.89,4,227.99) | -0.02(-0.03,-0.01) | 495.45(348.03,666.65)                   | 962.54(676.60,1,279.71)   | -0.04(-0.06,-0.03) |
| <b>Norway</b>                           | 188,926.58(165,816.93,214,390.12)       | 2,892.91(2,530.60,3,277.74) | -0.1(-0.12,-0.07)  | 64,469.30(45,212.03,86,870.66)          | 952.62(662.78,1,285.94)   | -0.18(-0.19,-0.17) |
| <b>Oman</b>                             | 133,636.21(113,171.15,158,197.12)       | 3,087.16(2,716.54,3,502.32) | -0.03(-0.05,-0.02) | 35,425.92(24,024.68,48,332.84)          | 812.69(568.20,1,092.06)   | -0.03(-0.04,-0.01) |
| <b>Pakistan</b>                         | 4,127,306.15(3,539,079.99,4,763,854.62) | 2,535.35(2,208.55,2,904.11) | 0.08(0.06,0.1)     | 1,038,039.91(725,358.42,1,413,027.86)   | 647.50(458.87,877.97)     | 0.09(0.07,0.12)    |
| <b>Palau</b>                            | 811.57(714.27,928.63)                   | 3,809.00(3,384.79,4,299.12) | -0.04(-0.05,-0.04) | 210.06(149.21,284.02)                   | 973.03(695.58,1,303.80)   | -0.07(-0.08,-0.06) |
| <b>Palestine</b>                        | 117,258.78(102,575.95,134,387.73)       | 3,042.86(2,687.46,3,462.53) | -0.09(-0.1,-0.09)  | 29,959.29(20,906.66,39,885.20)          | 793.29(560.69,1,063.69)   | -0.13(-0.13,-0.12) |
| <b>Panama</b>                           | 120,255.06(106,249.29,136,497.23)       | 2,863.19(2,531.52,3,255.79) | 0(0,0)             | 31,900.77(22,251.51,42,725.24)          | 759.15(530.33,1,014.43)   | 0.01(0,0.02)       |
| <b>Papua New Guinea</b>                 | 289,570.65(252,866.62,332,062.91)       | 3,837.33(3,407.21,4,338.17) | 0.01(-0.01,0.02)   | 73,542.84(51,577.05,98,480.11)          | 980.45(693.12,1,306.97)   | 0.01(0.01,0.02)    |
| <b>Paraguay</b>                         | 203,739.66(179,054.98,232,132.29)       | 3,063.81(2,697.36,3,465.27) | 0.05(0.03,0.06)    | 54,281.15(37,934.45,73,898.12)          | 818.11(577.26,1,100.72)   | 0.1(0.09,0.12)     |
| <b>Peru</b>                             | 889,037.94(780,586.31,1,012,187.40)     | 2,610.81(2,295.83,2,958.79) | 0.05(0.04,0.05)    | 233,394.96(164,429.62,313,906.91)       | 684.71(483.35,922.18)     | 0.08(0.06,0.09)    |
| <b>Philippines</b>                      | 3,729,919.24(3,296,122.33,4,242,003.57) | 3,789.79(3,368.07,4,276.91) | -0.21(-0.22,-0.19) | 982,175.74(690,237.70,1,303,799.44)     | 1,000.37(704.90,1,329.84) | -0.22(-0.23,-0.2)  |
| <b>Poland</b>                           | 2,090,331.69(1,851,196.25,2,364,558.98) | 4,179.43(3,702.20,4,717.38) | -0.12(-0.13,-0.11) | 573,775.16(404,876.07,774,282.63)       | 1,129.38(793.14,1,516.06) | -0.12(-0.13,-0.1)  |
| <b>Portugal</b>                         | 408,355.99(361,914.03,463,668.28)       | 2,934.40(2,577.82,3,323.78) | 0(-0.02,0.02)      | 174,350.31(124,036.33,234,904.84)       | 1,162.74(826.42,1,568.41) | -0.04(-0.06,-0.01) |
| <b>Puerto Rico</b>                      | 126,325.88(111,861.22,142,913.51)       | 2,702.66(2,383.87,3,065.90) | -0.04(-0.04,-0.03) | 33,476.36(23,860.80,44,890.09)          | 708.03(501.40,949.50)     | -0.04(-0.05,-0.04) |
| <b>Qatar</b>                            | 95,629.87(81,013.10,114,715.57)         | 3,184.13(2,795.35,3,622.56) | -0.01(-0.03,0)     | 25,694.56(17,540.97,35,013.61)          | 839.51(592.38,1,132.84)   | -0.01(-0.01,0)     |
| <b>Republic of Korea</b>                | 1,846,856.30(1,610,991.29,2,108,698.76) | 2,704.08(2,371.06,3,074.69) | -0.1(-0.12,-0.08)  | 714,324.80(501,072.42,966,622.63)       | 993.31(693.92,1,338.83)   | -0.21(-0.22,-0.2)  |
| <b>Republic of Moldova</b>              | 168,818.81(149,259.51,191,344.22)       | 3,574.37(3,159.30,4,051.64) | -0.09(-0.1,-0.08)  | 45,961.09(32,044.11,61,577.80)          | 958.79(670.69,1,280.99)   | -0.11(-0.12,-0.1)  |
| <b>Romania</b>                          | 1,044,385.83(924,912.86,1,184,344.08)   | 4,140.40(3,651.59,4,697.00) | -0.16(-0.17,-0.15) | 297,190.59(210,123.75,403,485.06)       | 1,156.94(807.55,1,555.60) | -0.2(-0.22,-0.19)  |
| <b>Russian Federation</b>               | 7,129,221.79(6,336,404.98,8,070,020.87) | 3,790.17(3,369.46,4,259.48) | -0.08(-0.09,-0.07) | 1,950,050.46(1,390,778.90,2,632,312.96) | 1,022.96(722.61,1,368.01) | -0.07(-0.08,-0.05) |
| <b>Rwanda</b>                           | 261,999.50(229,206.81,300,032.20)       | 2,825.48(2,497.11,3,202.72) | -0.1(-0.14,-0.07)  | 67,950.79(47,394.75,91,127.79)          | 749.45(523.98,1,008.84)   | -0.11(-0.14,-0.08) |
| <b>Saint Kitts and Nevis</b>            | 1,844.46(1,610.54,2,114.77)             | 2,732.83(2,401.09,3,098.11) | -0.07(-0.07,-0.06) | 489.40(344.17,656.30)                   | 717.94(503.78,961.84)     | -0.07(-0.08,-0.06) |
| <b>Saint Lucia</b>                      | 5,651.94(4,992.62,6,439.95)             | 2,785.93(2,464.12,3,163.21) | -0.11(-0.12,-0.11) | 1,503.23(1,055.50,2,025.10)             | 733.48(514.95,984.19)     | -0.13(-0.14,-0.12) |



|                                         |                                         |                             |                    |                                     |                           |                    |
|-----------------------------------------|-----------------------------------------|-----------------------------|--------------------|-------------------------------------|---------------------------|--------------------|
| <b>Saint Vincent and the Grenadines</b> | 3,427.49(3,024.05,3,893.40)             | 2,718.85(2,397.95,3,075.67) | -0.05(-0.06,-0.05) | 902.12(634.92,1,203.47)             | 711.05(498.67,949.54)     | -0.07(-0.08,-0.07) |
| <b>Samoa</b>                            | 7,164.05(6,315.71,8,068.73)             | 3,970.79(3,524.44,4,448.23) | -0.13(-0.13,-0.12) | 1,845.98(1,303.42,2,465.24)         | 1,034.08(733.37,1,379.46) | -0.17(-0.19,-0.14) |
| <b>San Marino</b>                       | 1,138.91(999.56,1,295.28)               | 2,787.07(2,442.88,3,174.29) | -0.03(-0.05,-0.01) | 449.31(316.26,606.45)               | 1,044.13(735.81,1,416.09) | -0.14(-0.14,-0.13) |
| <b>Sao Tome and Principe</b>            | 4,161.38(3,622.22,4,771.59)             | 2,586.86(2,294.31,2,935.09) | 0.04(0.03,0.05)    | 1,053.84(739.45,1,422.39)           | 664.15(467.04,893.06)     | 0.05(0.04,0.07)    |
| <b>Saudi Arabia</b>                     | 1,104,495.99(943,691.81,1,291,966.87)   | 3,071.75(2,708.84,3,479.18) | -0.01(-0.01,0)     | 291,698.87(199,992.24,397,000.24)   | 802.98(568.26,1,071.70)   | 0(-0.01,0.01)      |
| <b>Senegal</b>                          | 291,135.70(255,570.35,331,979.86)       | 2,622.30(2,309.71,2,967.96) | -0.03(-0.05,-0.01) | 73,512.14(51,585.31,98,401.81)      | 674.29(473.02,909.82)     | -0.03(-0.05,-0.01) |
| <b>Serbia</b>                           | 452,981.45(400,643.55,514,424.00)       | 4,078.44(3,602.04,4,623.92) | -0.02(-0.03,-0.01) | 126,999.05(89,142.01,170,742.79)    | 1,126.58(783.22,1,515.45) | -0.02(-0.03,0)     |
| <b>Seychelles</b>                       | 3,672.90(3,233.60,4,200.19)             | 3,248.30(2,879.90,3,679.23) | -0.13(-0.13,-0.12) | 935.25(654.50,1,260.84)             | 818.37(578.24,1,100.91)   | -0.16(-0.17,-0.16) |
| <b>Sierra Leone</b>                     | 164,606.29(143,458.85,187,688.61)       | 2,801.96(2,484.55,3,174.98) | -0.1(-0.11,-0.09)  | 42,260.92(29,642.15,56,978.71)      | 735.07(521.01,993.25)     | -0.1(-0.11,-0.1)   |
| <b>Singapore</b>                        | 165,762.32(143,055.46,190,636.12)       | 2,371.31(2,056.01,2,714.28) | -0.11(-0.15,-0.07) | 57,265.13(40,455.92,78,642.74)      | 787.29(552.02,1,073.63)   | -0.25(-0.29,-0.2)  |
| <b>Slovakia</b>                         | 279,993.85(247,913.72,320,289.80)       | 4,036.38(3,585.55,4,604.07) | -0.09(-0.09,-0.08) | 78,493.45(55,513.75,106,443.92)     | 1,110.67(779.04,1,491.05) | -0.1(-0.11,-0.09)  |
| <b>Slovenia</b>                         | 109,411.92(96,908.39,123,980.72)        | 3,918.50(3,460.43,4,434.95) | -0.09(-0.11,-0.08) | 30,339.49(21,196.57,40,785.57)      | 1,066.92(734.80,1,438.93) | -0.09(-0.09,-0.08) |
| <b>Solomon Islands</b>                  | 18,667.41(16,308.27,21,396.24)          | 3,820.15(3,391.36,4,319.07) | 0.04(0.04,0.05)    | 4,723.49(3,300.51,6,323.63)         | 977.60(686.77,1,298.42)   | 0.05(0.03,0.06)    |
| <b>Somalia</b>                          | 340,493.62(296,039.16,392,492.42)       | 2,778.73(2,444.31,3,153.48) | 0.04(0.04,0.05)    | 86,432.28(60,300.62,115,883.19)     | 730.47(517.35,977.12)     | 0.08(0.07,0.08)    |
| <b>South Africa</b>                     | 1,272,855.21(1,122,861.09,1,454,733.21) | 2,423.99(2,151.43,2,760.58) | -0.25(-0.26,-0.24) | 324,137.43(227,787.60,432,738.94)   | 617.56(434.67,829.16)     | -0.29(-0.31,-0.27) |
| <b>South Sudan</b>                      | 170,615.56(149,218.33,196,090.23)       | 2,789.19(2,453.97,3,166.66) | 0.02(0.01,0.03)    | 43,120.72(30,392.16,57,929.37)      | 724.68(516.11,976.86)     | 0.05(0.03,0.06)    |
| <b>Spain</b>                            | 1,771,794.41(1,548,273.54,2,027,170.14) | 2,940.45(2,568.93,3,355.52) | -0.53(-0.57,-0.49) | 515,882.87(371,030.61,703,160.32)   | 824.30(587.57,1,128.66)   | -0.69(-0.74,-0.64) |
| <b>Sri Lanka</b>                        | 773,104.95(684,744.90,873,795.25)       | 3,201.15(2,843.19,3,608.64) | 0.05(0.04,0.06)    | 194,301.43(137,876.91,261,712.81)   | 799.74(562.82,1,070.14)   | 0.07(0.05,0.09)    |
| <b>Sudan</b>                            | 927,367.57(803,297.79,1,067,814.50)     | 3,010.11(2,654.00,3,429.23) | -0.04(-0.05,-0.04) | 237,413.97(164,626.70,316,341.26)   | 788.35(553.45,1,045.11)   | -0.05(-0.06,-0.04) |
| <b>Suriname</b>                         | 16,785.15(14,783.20,19,210.60)          | 2,769.29(2,444.14,3,146.84) | 0.02(0.02,0.02)    | 4,409.74(3,108.08,5,931.65)         | 725.33(511.28,976.05)     | 0.02(0.01,0.02)    |
| <b>Sweden</b>                           | 365,901.12(322,555.22,413,121.38)       | 2,855.19(2,512.56,3,214.71) | -0.04(-0.06,-0.01) | 128,742.21(90,975.13,173,431.91)    | 953.04(666.85,1,291.23)   | -0.11(-0.13,-0.1)  |
| <b>Switzerland</b>                      | 326,873.52(289,528.13,369,532.27)       | 2,992.14(2,642.43,3,370.45) | -0.42(-0.44,-0.4)  | 139,205.44(98,011.37,187,984.30)    | 1,197.23(836.36,1,618.92) | -0.91(-1.01,-0.82) |
| <b>Syrian Arab Republic</b>             | 433,622.64(378,476.57,495,509.22)       | 3,056.33(2,686.23,3,463.24) | -0.13(-0.13,-0.12) | 113,375.23(79,652.52,152,270.69)    | 802.33(559.55,1,070.61)   | -0.18(-0.18,-0.17) |
| <b>Taiwan (Province of China)</b>       | 1,107,010.57(980,408.95,1,264,382.06)   | 3,477.56(3,088.03,3,924.51) | -0.55(-0.57,-0.53) | 295,050.88(208,352.64,401,303.08)   | 914.28(643.11,1,234.75)   | -0.74(-0.78,-0.7)  |
| <b>Tajikistan</b>                       | 234,981.02(205,457.08,269,165.95)       | 3,053.38(2,691.51,3,476.04) | -0.12(-0.13,-0.11) | 60,765.64(42,386.38,81,768.85)      | 799.91(561.50,1,078.50)   | -0.15(-0.16,-0.14) |
| <b>Thailand</b>                         | 2,817,816.75(2,497,444.90,3,209,591.55) | 3,147.61(2,787.79,3,553.42) | 0.1(0.08,0.11)     | 718,066.48(506,880.36,967,170.32)   | 792.68(556.93,1,066.94)   | 0.17(0.15,0.18)    |
| <b>Timor-Leste</b>                      | 34,002.64(29,951.89,38,633.82)          | 3,266.06(2,887.48,3,694.64) | -0.18(-0.19,-0.18) | 8,463.66(5,992.07,11,357.35)        | 822.07(580.74,1,094.91)   | -0.21(-0.22,-0.19) |
| <b>Togo</b>                             | 163,526.15(142,304.85,187,329.43)       | 2,783.88(2,463.17,3,154.34) | 0.01(0,0.01)       | 41,999.00(29,432.19,56,566.35)      | 729.69(510.98,990.28)     | 0.03(0.02,0.03)    |
| <b>Tokelau</b>                          | 51.28(45.54,58.18)                      | 3,840.67(3,409.08,4,346.68) | -0.07(-0.09,-0.06) | 13.14(9.30,17.55)                   | 986.98(694.54,1,316.94)   | -0.09(-0.11,-0.07) |
| <b>Tonga</b>                            | 3,501.05(3,093.96,3,955.11)             | 3,920.67(3,480.98,4,429.17) | -0.04(-0.04,-0.03) | 899.38(634.43,1,201.36)             | 1,016.06(716.68,1,359.79) | -0.05(-0.06,-0.05) |
| <b>Trinidad and Tobago</b>              | 44,773.25(39,514.87,51,040.94)          | 2,740.62(2,413.77,3,112.19) | -0.06(-0.07,-0.06) | 11,876.90(8,387.78,16,042.02)       | 719.61(508.43,963.43)     | -0.07(-0.08,-0.06) |
| <b>Tunisia</b>                          | 382,940.09(337,332.72,438,013.00)       | 3,009.42(2,660.61,3,420.74) | -0.01(-0.02,0)     | 101,525.17(71,421.68,135,332.45)    | 791.55(553.52,1,052.37)   | 0(-0.01,0)         |
| <b>Turkey</b>                           | 3,140,049.67(2,767,926.68,3,566,642.52) | 3,452.61(3,052.34,3,899.15) | -0.33(-0.34,-0.31) | 874,588.30(608,052.40,1,178,265.52) | 953.56(671.35,1,283.54)   | -0.51(-0.54,-0.48) |
| <b>Turkmenistan</b>                     | 147,762.59(129,319.23,168,955.19)       | 3,124.17(2,752.74,3,551.13) | -0.09(-0.1,-0.09)  | 38,932.67(27,242.12,52,007.17)      | 826.36(582.04,1,109.20)   | -0.11(-0.12,-0.1)  |
| <b>Tuvalu</b>                           | 432.53(382.96,486.33)                   | 3,856.56(3,428.86,4,339.88) | -0.08(-0.08,-0.07) | 111.19(78.63,147.58)                | 992.68(705.10,1,316.51)   | -0.1(-0.1,-0.09)   |
| <b>Uganda</b>                           | 686,019.66(593,468.14,781,919.69)       | 2,757.46(2,429.48,3,134.47) | 0.01(0,0.01)       | 173,703.08(120,701.24,234,274.34)   | 724.73(507.82,977.36)     | 0.07(0.05,0.08)    |
| <b>Ukraine</b>                          | 2,340,533.83(2,085,795.12,2,652,914.70) | 4,007.15(3,543.75,4,509.24) | -0.04(-0.05,-0.03) | 644,464.21(457,328.90,860,165.41)   | 1,086.13(763.80,1,449.14) | -0.03(-0.05,-0.02) |
| <b>United Arab Emirates</b>             | 330,457.29(271,005.34,401,766.74)       | 3,053.03(2,672.01,3,475.22) | -0.03(-0.04,-0.03) | 89,026.33(60,321.67,122,762.20)     | 798.88(559.50,1,067.81)   | -0.03(-0.03,-0.02) |
| <b>United Kingdom</b>                   | 2,550,022.38(2,248,491.54,2,883,906.81) | 3,088.56(2,706.52,3,491.82) | -0.18(-0.21,-0.15) | 960,132.55(675,143.47,1,285,197.77) | 1,108.05(774.57,1,494.63) | -0.35(-0.41,-0.3)  |
| <b>United Republic of Tanzania</b>      | 1,018,492.50(886,211.57,1,161,188.75)   | 2,686.51(2,373.79,3,045.64) | -0.06(-0.07,-0.05) | 259,222.00(180,997.69,347,388.89)   | 702.58(490.47,941.26)     | -0.03(-0.04,-0.01) |

|                                           |                                            |                             |                    |                                         |                             |                    |
|-------------------------------------------|--------------------------------------------|-----------------------------|--------------------|-----------------------------------------|-----------------------------|--------------------|
| <b>United States of America</b>           | 13,729,603.68(12,299,926.60,15,289,783.53) | 3,514.93(3,150.80,3,937.23) | -0.24(-0.27,-0.21) | 5,697,152.11(4,114,138.91,7,474,689.77) | 1,402.94(1,006.97,1,852.25) | -0.46(-0.52,-0.4)  |
| <b>United States Virgin Islands</b>       | 3,617.62(3,188.20,4,120.19)                | 2,738.54(2,398.53,3,107.83) | -0.01(-0.01,-0.01) | 963.47(679.31,1,284.28)                 | 720.88(507.01,963.35)       | -0.02(-0.03,-0.02) |
| <b>Uruguay</b>                            | 97,041.82(85,255.35,110,066.53)            | 2,427.46(2,118.86,2,753.93) | 0.14(0.11,0.17)    | 33,064.31(23,209.61,44,602.70)          | 807.64(564.70,1,087.32)     | 0.18(0.16,0.21)    |
| <b>Uzbekistan</b>                         | 922,383.55(807,959.50,1,063,274.59)        | 3,106.12(2,751.43,3,530.75) | -0.01(-0.02,-0.01) | 240,049.78(167,097.19,321,813.83)       | 814.74(575.70,1,089.94)     | -0.01(-0.02,0)     |
| <b>Vanuatu</b>                            | 9,778.20(8,657.42,11,045.66)               | 4,160.10(3,700.62,4,674.50) | 0.07(0.06,0.07)    | 2,547.41(1,785.45,3,403.60)             | 1,097.04(778.33,1,462.04)   | 0.09(0.08,0.1)     |
| <b>Venezuela (Bolivarian Republic of)</b> | 833,793.77(732,586.94,944,501.06)          | 2,820.33(2,482.42,3,184.67) | -0.12(-0.14,-0.11) | 221,660.21(153,427.70,297,374.35)       | 746.15(518.27,997.03)       | -0.16(-0.17,-0.15) |
| <b>Viet Nam</b>                           | 3,551,710.95(3,129,780.75,4,059,097.35)    | 3,471.23(3,075.36,3,922.07) | 0.14(0.13,0.14)    | 925,791.95(648,655.59,1,242,251.40)     | 896.10(634.20,1,202.73)     | 0.2(0.18,0.22)     |
| <b>Yemen</b>                              | 707,217.77(614,181.32,811,160.95)          | 3,072.84(2,702.73,3,471.55) | -0.16(-0.16,-0.15) | 180,905.09(124,717.63,242,345.68)       | 807.22(563.69,1,075.22)     | -0.19(-0.2,-0.18)  |
| <b>Zambia</b>                             | 312,275.55(270,696.48,360,185.68)          | 2,645.70(2,328.65,3,014.19) | 0.26(0.25,0.28)    | 78,481.54(54,687.30,104,112.68)         | 685.47(479.96,915.38)       | 0.37(0.35,0.38)    |
| <b>Zimbabwe</b>                           | 298,105.75(259,973.09,341,998.14)          | 2,795.34(2,462.96,3,176.93) | 0.14(0.12,0.15)    | 77,368.10(54,125.92,104,789.49)         | 741.99(521.58,1,003.63)     | 0.2(0.19,0.2)      |

**Table S11.** The numbers (2019), ASRs per 100,000 (2019), and AAPCs (1990-2019) in incidence and DALY for NP in 204 countries.

| Characteristic                          | Incident cases                    |                       |                    | DALYs                             |                                         |                    |
|-----------------------------------------|-----------------------------------|-----------------------|--------------------|-----------------------------------|-----------------------------------------|--------------------|
|                                         | Numbers<br>(95% UI)               | ASIR<br>(95% UI)      | AAPC<br>(95% CI)   | Numbers<br>(95% CI)               | Age-standardized<br>DALYs rate (95% UI) | AAPC<br>(95% CI)   |
| <b>Afghanistan</b>                      | 148,128.69(110,847.69,194,129.37) | 600.70(472.24,770.29) | -0.05(-0.05,-0.05) | 62,138.18(40,157.80,90,270.50)    | 277.73(184.49,403.59)                   | -0.04(-0.04,-0.03) |
| <b>Albania</b>                          | 10,752.53(8,485.22,13,387.44)     | 326.04(255.48,412.00) | 0.01(0.01,0.01)    | 4,817.08(3,131.05,6,971.37)       | 141.15(92.54,205.30)                    | 0.02(0.02,0.02)    |
| <b>Algeria</b>                          | 255,805.88(197,820.04,335,480.42) | 601.88(473.30,773.77) | -0.01(-0.01,0)     | 117,900.71(76,888.29,172,558.92)  | 283.99(186.90,411.29)                   | -0.02(-0.02,-0.02) |
| <b>American Samoa</b>                   | 356.05(279.48,451.74)             | 677.03(536.23,855.94) | 0.01(0.01,0.01)    | 165.82(108.76,239.95)             | 316.60(207.22,455.44)                   | 0(-0.01,0)         |
| <b>Andorra</b>                          | 611.77(478.67,771.81)             | 594.48(466.99,754.22) | 0.02(0.01,0.02)    | 398.83(259.11,578.39)             | 353.53(232.56,512.12)                   | 0.01(0,0.02)       |
| <b>Angola</b>                           | 53,933.98(41,156.07,69,791.50)    | 269.03(209.52,341.35) | 0.02(0.02,0.02)    | 21,482.62(13,990.32,31,550.83)    | 114.11(75.63,165.00)                    | 0.03(0.03,0.04)    |
| <b>Antigua and Barbuda</b>              | 325.84(252.90,415.97)             | 313.75(244.63,397.96) | 0(0,0)             | 142.40(92.72,207.13)              | 135.05(88.46,193.81)                    | -0.02(-0.02,-0.01) |
| <b>Argentina</b>                        | 194,545.80(152,800.64,244,916.91) | 396.82(310.34,501.40) | 0(0,0)             | 95,349.56(62,523.24,135,862.24)   | 192.24(126.84,273.44)                   | 0(-0.01,0)         |
| <b>Armenia</b>                          | 11,750.43(9,249.13,14,830.12)     | 326.75(256.25,412.87) | 0(0,0)             | 5,185.16(3,395.41,7,490.42)       | 141.41(92.40,204.84)                    | 0.01(0,0.01)       |
| <b>Australia</b>                        | 74,124.34(58,770.49,92,219.83)    | 246.19(194.93,307.68) | 0(0,0)             | 33,602.12(21,711.50,48,524.79)    | 107.86(70.81,155.14)                    | 0(-0.01,0.01)      |
| <b>Austria</b>                          | 63,197.65(49,770.89,78,720.42)    | 595.67(467.56,755.21) | 0(-0.01,0)         | 41,227.67(26,880.45,59,663.84)    | 355.25(234.14,515.17)                   | -0.01(-0.02,-0.01) |
| <b>Azerbaijan</b>                       | 36,880.34(28,480.81,47,778.30)    | 326.33(255.90,412.46) | -0.01(-0.01,-0.01) | 15,951.44(10,299.59,23,437.90)    | 141.31(92.25,204.00)                    | -0.01(-0.02,-0.01) |
| <b>Bahamas</b>                          | 1,337.06(1,033.69,1,714.13)       | 313.90(244.79,397.72) | 0(0,0)             | 580.30(375.44,845.07)             | 135.24(88.87,195.33)                    | -0.01(-0.01,-0.01) |
| <b>Bahrain</b>                          | 10,704.83(7,958.59,14,829.37)     | 571.97(449.82,731.90) | -0.03(-0.04,-0.02) | 4,834.37(3,128.47,7,160.09)       | 264.11(175.41,382.45)                   | -0.08(-0.09,-0.07) |
| <b>Bangladesh</b>                       | 502,952.35(394,601.27,639,970.48) | 326.02(255.38,412.15) | 0.01(0.01,0.01)    | 212,193.65(138,025.31,305,491.10) | 139.67(91.19,201.36)                    | 0.03(0.02,0.04)    |
| <b>Barbados</b>                         | 1,181.59(928.77,1,490.45)         | 313.85(244.72,397.71) | 0(0,0)             | 531.44(346.61,776.79)             | 135.53(88.99,196.01)                    | -0.02(-0.02,-0.01) |
| <b>Belarus</b>                          | 40,072.92(31,537.97,50,367.98)    | 326.85(256.46,413.10) | 0(0,0)             | 17,946.95(11,615.37,25,994.24)    | 141.13(91.20,203.80)                    | 0.01(0.01,0.02)    |
| <b>Belgium</b>                          | 70,871.61(55,641.39,87,026.63)    | 528.75(412.85,668.56) | 0(0,0)             | 42,719.80(28,673.37,62,296.17)    | 296.15(198.44,430.52)                   | -0.01(-0.03,0)     |
| <b>Belize</b>                           | 1,169.15(898.82,1,500.01)         | 313.17(244.07,397.44) | 0.01(0.01,0.01)    | 488.69(318.38,701.98)             | 134.77(90.38,194.99)                    | -0.01(-0.02,-0.01) |
| <b>Benin</b>                            | 23,133.29(17,648.99,29,795.10)    | 276.92(216.03,353.13) | -0.01(-0.01,-0.01) | 9,237.35(6,038.28,13,317.10)      | 118.09(78.25,170.26)                    | 0.01(0.01,0.02)    |
| <b>Bermuda</b>                          | 275.53(215.69,349.07)             | 313.49(244.42,397.00) | 0(0,0)             | 126.15(81.94,181.95)              | 135.80(89.55,196.35)                    | -0.01(-0.01,-0.01) |
| <b>Bhutan</b>                           | 2,381.88(1,863.84,3,059.29)       | 325.07(254.90,410.50) | 0(0,0)             | 995.54(642.36,1,460.49)           | 139.25(90.88,201.91)                    | 0(0,0.01)          |
| <b>Bolivia (Plurinational State of)</b> | 33,782.01(26,245.29,43,150.29)    | 313.32(244.17,397.03) | 0(0,0)             | 14,228.76(9,487.61,20,517.70)     | 134.77(89.60,194.02)                    | 0.01(0.01,0.01)    |
| <b>Bosnia and Herzegovina</b>           | 14,233.01(11,259.58,17,774.83)    | 326.17(255.80,412.10) | 0(0,0)             | 6,384.61(4,143.45,9,225.37)       | 140.12(91.39,202.19)                    | -0.01(-0.02,-0.01) |
| <b>Botswana</b>                         | 5,776.41(4,413.14,7,548.20)       | 268.68(209.41,341.09) | -0.01(-0.01,-0.01) | 2,338.63(1,540.02,3,419.80)       | 112.67(74.16,161.44)                    | -0.04(-0.05,-0.03) |

|                                              |                                            |                         |                    |                                         |                       |                    |
|----------------------------------------------|--------------------------------------------|-------------------------|--------------------|-----------------------------------------|-----------------------|--------------------|
| <b>Brazil</b>                                | 1,225,839.99(958,335.33,1,571,603.86)      | 503.83(395.14,641.96)   | 0.03(0.02,0.03)    | 542,596.52(356,801.63,792,398.19)       | 221.72(145.36,322.57) | 0.05(0.01,0.08)    |
| <b>Brunei Darussalam</b>                     | 1,668.31(1,280.62,2,205.86)                | 355.81(278.81,457.29)   | 0.02(0.02,0.02)    | 778.25(506.29,1,138.15)                 | 170.23(112.38,244.65) | 0.04(0.03,0.05)    |
| <b>Bulgaria</b>                              | 30,913.96(24,496.63,38,297.95)             | 325.98(255.70,411.87)   | 0(0,0)             | 14,031.26(9,086.12,20,004.78)           | 140.63(91.04,202.20)  | 0(0,0.01)          |
| <b>Burkina Faso</b>                          | 42,120.98(32,081.12,54,278.04)             | 278.03(216.88,354.61)   | 0(0,0)             | 16,933.05(11,102.16,24,623.67)          | 118.85(77.55,171.40)  | 0.03(0.01,0.05)    |
| <b>Burundi</b>                               | 21,426.11(16,394.83,27,613.59)             | 266.91(208.08,338.81)   | -0.03(-0.03,-0.03) | 8,477.44(5,446.07,12,310.72)            | 112.61(73.96,162.06)  | -0.04(-0.04,-0.03) |
| <b>Cabo Verde</b>                            | 1,479.67(1,137.74,1,904.65)                | 275.71(214.84,351.39)   | -0.07(-0.07,-0.06) | 620.06(403.09,897.46)                   | 118.32(78.52,171.42)  | -0.07(-0.07,-0.07) |
| <b>Cambodia</b>                              | 120,355.28(93,353.05,155,838.92)           | 777.96(612.34,991.85)   | -0.01(-0.01,-0.01) | 56,599.80(37,085.89,82,740.42)          | 379.61(251.28,550.94) | 0(0,0.01)          |
| <b>Cameroon</b>                              | 57,367.11(43,504.69,74,286.85)             | 276.09(215.29,352.15)   | -0.01(-0.01,-0.01) | 22,904.96(14,743.30,33,436.37)          | 117.40(77.54,169.15)  | 0.01(0.01,0.02)    |
| <b>Canada</b>                                | 243,895.40(190,987.91,305,755.38)          | 534.31(419.47,676.66)   | 0(0,0)             | 144,834.01(95,234.21,210,106.99)        | 292.18(191.39,419.70) | -0.01(-0.01,-0.01) |
| <b>Central African Republic</b>              | 10,124.07(7,751.24,13,091.34)              | 268.43(209.21,340.65)   | 0(0,0)             | 4,037.66(2,584.22,5,900.70)             | 113.12(74.14,162.78)  | 0.01(0,0.02)       |
| <b>Chad</b>                                  | 26,755.16(20,448.64,34,054.44)             | 275.58(214.95,351.51)   | -0.03(-0.03,-0.03) | 10,561.69(6,813.76,15,297.87)           | 116.82(77.44,168.68)  | -0.04(-0.04,-0.03) |
| <b>Chile</b>                                 | 83,784.68(65,783.63,104,946.94)            | 396.51(310.13,500.97)   | -0.01(-0.01,-0.01) | 41,651.56(27,179.99,60,077.01)          | 191.63(126.24,275.07) | -0.01(-0.01,0)     |
| <b>China</b>                                 | 14,887,967.20(11,666,334.23,19,183,944.68) | 809.91(641.89,1,028.61) | 0.04(0.04,0.04)    | 6,791,996.75(4,412,004.83,9,788,048.76) | 358.13(234.54,515.95) | 0.05(0.05,0.06)    |
| <b>Colombia</b>                              | 161,551.90(125,758.96,203,970.18)          | 313.86(244.76,397.72)   | 0.01(0,0.01)       | 70,214.23(46,582.44,102,460.81)         | 135.53(89.98,196.88)  | 0.02(0.02,0.03)    |
| <b>Comoros</b>                               | 1,688.81(1,298.00,2,170.94)                | 268.00(208.86,340.22)   | 0(-0.01,0)         | 702.29(456.81,1,023.88)                 | 114.45(74.63,165.65)  | 0.02(0.01,0.02)    |
| <b>Congo</b>                                 | 11,483.74(8,723.03,14,965.62)              | 267.68(208.60,339.76)   | -0.02(-0.02,-0.02) | 4,662.07(2,986.62,6,849.18)             | 113.27(74.22,162.01)  | -0.01(-0.02,0)     |
| <b>Cook Islands</b>                          | 137.43(107.37,172.45)                      | 678.90(537.61,859.00)   | 0.02(0.02,0.03)    | 67.22(43.42,96.32)                      | 318.94(207.33,456.20) | 0.01(0,0.02)       |
| <b>Costa Rica</b>                            | 16,250.87(12,657.16,20,604.75)             | 313.90(244.79,397.91)   | 0.01(0.01,0.01)    | 7,030.35(4,643.91,10,163.74)            | 135.25(89.30,195.73)  | 0.01(0,0.02)       |
| <b>Croatia</b>                               | 18,542.63(14,782.55,22,953.18)             | 326.08(255.69,411.91)   | 0(0,0)             | 8,352.01(5,443.90,11,996.81)            | 140.21(91.44,202.65)  | 0(0,0)             |
| <b>Cuba</b>                                  | 45,819.49(35,787.02,58,377.44)             | 313.22(244.07,396.85)   | 0(0,0)             | 20,639.54(13,460.99,29,955.54)          | 134.91(88.82,195.81)  | 0(0,0.01)          |
| <b>Cyprus</b>                                | 9,199.71(7,237.33,11,691.43)               | 597.53(468.75,757.78)   | 0.01(0.01,0.01)    | 5,775.82(3,812.01,8,367.67)             | 356.98(233.82,515.20) | 0.01(0.01,0.01)    |
| <b>Czechia</b>                               | 46,379.28(36,751.45,58,003.23)             | 325.87(255.55,411.56)   | -0.01(-0.01,-0.01) | 20,764.29(13,629.23,29,760.51)          | 139.70(91.55,201.13)  | -0.01(-0.02,0)     |
| <b>Côte d'Ivoire</b>                         | 52,981.90(40,046.59,69,127.30)             | 273.89(213.48,349.16)   | 0(0,0)             | 21,206.09(13,755.78,30,943.05)          | 116.26(76.90,165.97)  | 0.03(0.03,0.04)    |
| <b>Democratic People's Republic of Korea</b> | 205,668.55(159,966.19,261,159.57)          | 660.06(518.38,829.83)   | -0.03(-0.03,-0.03) | 100,950.67(66,725.99,148,360.71)        | 317.22(208.13,462.08) | -0.04(-0.04,-0.04) |
| <b>Democratic Republic of the Congo</b>      | 163,839.82(125,190.87,211,713.15)          | 268.05(209.03,340.22)   | -0.01(-0.01,-0.01) | 65,178.74(42,514.22,94,761.70)          | 113.24(74.58,163.74)  | 0.02(0,0.03)       |
| <b>Denmark</b>                               | 46,303.36(36,603.14,57,393.37)             | 696.26(547.27,881.31)   | 0.01(-0.01,0.02)   | 32,653.82(21,563.91,47,048.08)          | 446.46(298.43,647.40) | 0.01(-0.02,0.04)   |
| <b>Djibouti</b>                              | 2,756.60(2,100.08,3,618.30)                | 266.41(207.64,338.33)   | 0(0,0)             | 1,126.86(735.58,1,656.08)               | 113.31(74.08,162.39)  | -0.01(-0.01,0)     |
| <b>Dominica</b>                              | 243.13(190.54,306.72)                      | 312.72(243.75,396.29)   | -0.01(-0.01,-0.01) | 106.67(70.53,153.29)                    | 134.26(88.54,193.89)  | -0.04(-0.04,-0.03) |
| <b>Dominican Republic</b>                    | 33,245.12(25,823.88,42,449.39)             | 313.09(243.96,396.66)   | 0(0,0)             | 14,169.27(9,370.17,20,368.07)           | 135.11(89.80,194.34)  | -0.01(-0.02,0)     |
| <b>Ecuador</b>                               | 53,034.75(41,251.19,67,401.32)             | 313.43(244.29,397.35)   | 0(0,0)             | 22,617.03(14,941.79,32,699.38)          | 135.20(89.11,195.49)  | 0(0,0)             |
| <b>Egypt</b>                                 | 529,837.47(410,943.12,693,416.85)          | 598.07(470.77,768.39)   | -0.02(-0.02,-0.02) | 239,226.40(156,647.14,353,108.32)       | 281.23(186.53,412.03) | -0.04(-0.04,-0.03) |
| <b>El Salvador</b>                           | 19,157.82(14,939.81,24,252.64)             | 315.11(245.82,400.10)   | 0.01(0.01,0.01)    | 8,148.07(5,373.19,11,846.34)            | 135.16(89.03,196.53)  | 0.01(0.01,0.02)    |
| <b>Equatorial Guinea</b>                     | 2,622.62(1,992.84,3,422.96)                | 269.04(209.80,341.72)   | -0.01(-0.01,-0.01) | 1,026.65(666.77,1,505.65)               | 113.92(75.54,162.99)  | 0.03(0.02,0.04)    |

|                                   |                                         |                         |                    |                                         |                       |                    |
|-----------------------------------|-----------------------------------------|-------------------------|--------------------|-----------------------------------------|-----------------------|--------------------|
| <b>Eritrea</b>                    | 13,259.38(10,107.16,17,256.21)          | 268.39(209.33,340.77)   | -0.01(-0.01,-0.01) | 5,290.02(3,423.73,7,779.10)             | 113.67(74.48,164.21)  | 0.01(-0.01,0.02)   |
| <b>Estonia</b>                    | 5,601.73(4,453.82,6,915.85)             | 326.35(256.09,412.21)   | -0.01(-0.01,-0.01) | 2,528.49(1,650.58,3,635.75)             | 141.03(92.63,204.95)  | 0.01(0,0.02)       |
| <b>Eswatini</b>                   | 2,448.30(1,875.45,3,180.27)             | 269.31(209.90,341.89)   | 0(0,0)             | 973.56(638.01,1,414.69)                 | 112.51(74.27,161.63)  | -0.05(-0.06,-0.04) |
| <b>Ethiopia</b>                   | 235,214.25(181,139.43,306,887.42)       | 321.21(253.86,408.65)   | 0(0,0)             | 92,490.78(59,626.06,134,191.75)         | 134.51(87.84,191.31)  | 0.03(0.03,0.03)    |
| <b>Fiji</b>                       | 6,109.73(4,807.79,7,835.60)             | 675.73(535.11,853.67)   | 0(0,0)             | 2,823.18(1,856.93,4,071.86)             | 316.45(206.72,452.75) | -0.02(-0.02,-0.02) |
| <b>Finland</b>                    | 43,526.73(34,953.86,53,343.66)          | 671.89(530.58,849.84)   | 0.01(-0.04,0.06)   | 30,554.17(20,410.30,43,526.95)          | 428.80(288.49,611.15) | 0(-0.04,0.03)      |
| <b>France</b>                     | 391,812.30(310,957.96,480,563.89)       | 507.58(398.72,635.32)   | 0(0,0)             | 231,701.18(153,012.07,333,582.36)       | 279.23(185.91,406.67) | 0.01(-0.01,0.02)   |
| <b>Gabon</b>                      | 4,039.60(3,077.54,5,205.35)             | 268.44(209.06,340.56)   | 0.01(0,0.01)       | 1,651.94(1,080.62,2,416.68)             | 113.44(75.36,164.06)  | 0(0,0)             |
| <b>Gambia</b>                     | 4,375.86(3,350.40,5,656.54)             | 276.06(215.33,351.99)   | 0.03(0.03,0.03)    | 1,745.49(1,124.96,2,516.70)             | 117.44(77.16,168.82)  | 0.03(0.02,0.04)    |
| <b>Georgia</b>                    | 14,687.65(11,595.15,18,302.12)          | 326.56(256.18,412.61)   | -0.01(-0.01,-0.01) | 6,553.86(4,275.64,9,459.85)             | 140.87(92.11,205.20)  | -0.03(-0.03,-0.02) |
| <b>Germany</b>                    | 607,187.81(476,304.60,754,636.75)       | 594.75(466.76,753.91)   | -0.01(-0.01,-0.01) | 398,497.26(262,693.56,576,722.17)       | 353.80(234.96,510.13) | -0.03(-0.03,-0.02) |
| <b>Ghana</b>                      | 70,497.85(53,803.74,91,307.72)          | 277.85(216.64,354.32)   | 0.02(0.02,0.02)    | 28,741.50(18,586.95,41,560.26)          | 118.85(78.11,171.24)  | 0.03(0.03,0.04)    |
| <b>Greece</b>                     | 79,266.28(62,884.94,97,744.47)          | 630.74(497.39,796.52)   | -0.01(-0.02,0.01)  | 53,872.61(35,841.36,77,396.77)          | 388.09(259.18,557.29) | -0.01(-0.04,0.01)  |
| <b>Greenland</b>                  | 342.35(264.64,447.35)                   | 531.52(417.85,671.64)   | 0.03(0.03,0.04)    | 193.48(127.56,280.10)                   | 285.52(187.69,410.53) | 0.04(0.04,0.05)    |
| <b>Grenada</b>                    | 355.08(276.07,452.07)                   | 312.89(244.03,396.51)   | -0.01(-0.01,-0.01) | 154.34(101.18,225.18)                   | 134.27(89.77,192.60)  | -0.03(-0.03,-0.03) |
| <b>Guam</b>                       | 1,201.88(941.97,1,509.31)               | 675.02(534.44,853.41)   | 0.01(0.01,0.01)    | 580.29(375.69,836.56)                   | 319.80(207.50,459.68) | 0(-0.01,0)         |
| <b>Guatemala</b>                  | 46,944.91(36,537.69,60,645.57)          | 314.48(245.36,399.05)   | 0.01(0.01,0.01)    | 19,274.94(12,729.60,28,196.96)          | 134.53(88.69,194.73)  | 0.02(0.01,0.03)    |
| <b>Guinea</b>                     | 23,585.46(18,152.07,30,313.93)          | 277.20(216.00,353.68)   | 0(0,0)             | 9,447.73(6,134.95,13,619.96)            | 117.90(77.59,169.57)  | 0.01(0,0.01)       |
| <b>Guinea-Bissau</b>              | 3,684.29(2,794.49,4,782.90)             | 277.65(216.55,354.07)   | 0(0,0)             | 1,462.08(954.35,2,105.64)               | 118.14(77.94,169.83)  | 0.01(0,0.02)       |
| <b>Guyana</b>                     | 2,348.30(1,816.91,3,011.09)             | 313.59(244.50,397.41)   | 0(0,0)             | 987.60(644.95,1,434.94)                 | 133.31(88.78,192.17)  | 0(0,0)             |
| <b>Haiti</b>                      | 32,963.63(25,510.40,42,985.33)          | 314.02(244.89,398.21)   | 0(0,0.01)          | 13,462.18(8,662.80,19,717.08)           | 133.80(87.31,192.79)  | 0(-0.02,0.01)      |
| <b>Honduras</b>                   | 25,813.77(20,031.26,33,223.53)          | 314.03(244.87,398.20)   | 0.01(0.01,0.01)    | 10,680.88(6,919.46,15,637.14)           | 134.82(88.30,194.73)  | 0(0,0)             |
| <b>Hungary</b>                    | 42,595.85(33,704.00,52,960.29)          | 326.33(255.99,412.37)   | 0(0,0)             | 19,194.81(12,615.63,27,477.48)          | 140.52(91.65,203.05)  | 0.01(0,0.02)       |
| <b>Iceland</b>                    | 2,301.10(1,823.37,2,879.94)             | 594.96(466.87,753.91)   | 0(0,0)             | 1,452.32(949.20,2,102.69)               | 354.95(232.77,512.21) | -0.01(-0.01,0)     |
| <b>India</b>                      | 5,332,091.96(4,164,005.03,6,822,808.19) | 392.03(306.34,493.29)   | 0.01(0.01,0.01)    | 2,176,947.65(1,449,331.77,3,137,620.89) | 161.95(107.99,234.14) | 0.03(0.03,0.03)    |
| <b>Indonesia</b>                  | 2,649,930.25(2,051,113.64,3,411,548.99) | 965.00(763.65,1,218.88) | 0(0,0)             | 1,161,438.76(757,377.86,1,691,309.90)   | 427.53(280.32,613.71) | 0.01(0.01,0.02)    |
| <b>Iran (Islamic Republic of)</b> | 865,873.46(668,905.91,1,146,824.17)     | 934.14(732.88,1,189.94) | 0.02(0,0.03)       | 385,175.02(253,142.92,558,606.79)       | 423.54(280.26,609.82) | 0.04(0.01,0.06)    |
| <b>Iraq</b>                       | 215,073.49(165,120.74,281,624.14)       | 600.20(471.93,770.61)   | 0(0,0)             | 94,611.24(62,325.65,137,968.22)         | 281.54(186.75,409.52) | 0.01(0,0.01)       |
| <b>Ireland</b>                    | 33,136.60(26,113.10,41,573.21)          | 597.11(468.75,757.60)   | 0.01(0,0.01)       | 20,865.84(13,780.38,30,128.18)          | 355.47(236.57,516.66) | 0(-0.01,0.01)      |
| <b>Israel</b>                     | 56,566.31(44,742.70,71,052.44)          | 596.38(468.01,756.10)   | -0.01(-0.01,-0.01) | 34,502.79(22,582.07,49,838.32)          | 356.93(232.36,514.32) | -0.01(-0.01,-0.01) |
| <b>Italy</b>                      | 582,882.42(460,736.14,720,926.30)       | 773.46(611.97,973.96)   | -0.01(-0.01,-0.01) | 313,203.51(208,928.87,447,449.06)       | 384.17(254.24,546.39) | 0(0,0.01)          |
| <b>Jamaica</b>                    | 9,418.51(7,353.76,11,989.02)            | 313.39(244.37,397.47)   | 0(0,0)             | 4,051.67(2,663.99,5,815.29)             | 134.86(89.38,194.52)  | -0.02(-0.02,-0.02) |
| <b>Japan</b>                      | 798,968.00(631,030.89,989,719.65)       | 442.76(348.05,562.75)   | -0.01(-0.01,-0.01) | 377,560.06(248,509.82,546,899.63)       | 195.78(129.81,287.92) | 0(0,0)             |
| <b>Jordan</b>                     | 61,401.83(47,291.45,80,947.31)          | 592.94(466.91,759.50)   | -0.03(-0.03,-0.03) | 27,464.00(17,726.83,40,291.69)          | 279.58(185.86,407.10) | -0.03(-0.03,-      |



|                                         |                                   |                       |                    |                                   |                       |                    |
|-----------------------------------------|-----------------------------------|-----------------------|--------------------|-----------------------------------|-----------------------|--------------------|
|                                         |                                   |                       |                    |                                   |                       | 0.02)              |
| <b>Kazakhstan</b>                       | 62,545.19(48,519.04,79,991.45)    | 326.86(256.43,413.00) | 0(0,0)             | 26,937.11(17,616.71,39,617.89)    | 140.81(92.04,203.53)  | -0.01(-0.02,0.01)  |
| <b>Kenya</b>                            | 122,029.75(93,863.76,158,038.50)  | 321.78(254.47,409.09) | 0(0,0)             | 48,448.12(31,405.28,70,243.20)    | 134.50(88.58,191.49)  | 0.01(0.01,0.01)    |
| <b>Kiribati</b>                         | 689.38(536.38,890.73)             | 679.28(538.50,857.69) | 0.01(0.01,0.01)    | 307.99(200.20,444.18)             | 319.60(209.36,461.37) | 0.01(0.01,0.01)    |
| <b>Kuwait</b>                           | 25,771.15(19,075.11,34,888.37)    | 488.69(379.90,623.23) | 0.1(0.09,0.11)     | 10,849.71(6,978.32,16,598.96)     | 215.03(141.02,314.12) | 0.1(0.07,0.14)     |
| <b>Kyrgyzstan</b>                       | 19,483.29(15,052.16,25,060.48)    | 326.57(256.13,412.61) | 0(0,0)             | 8,266.76(5,303.81,12,100.97)      | 141.69(91.85,204.35)  | 0.01(0,0.01)       |
| <b>Lao People's Democratic Republic</b> | 49,802.93(38,382.92,64,746.55)    | 777.21(611.49,991.07) | 0(0,0)             | 22,999.40(15,116.21,33,668.87)    | 378.98(250.78,550.69) | 0.01(0.01,0.02)    |
| <b>Latvia</b>                           | 8,304.18(6,590.48,10,179.69)      | 326.69(256.31,412.82) | -0.01(-0.01,-0.01) | 3,760.70(2,424.58,5,422.47)       | 140.99(91.83,204.88)  | 0.02(0.01,0.02)    |
| <b>Lebanon</b>                          | 32,864.97(25,812.61,42,571.92)    | 608.36(477.48,782.11) | 0.01(0.01,0.02)    | 15,453.04(10,265.57,22,581.39)    | 287.84(188.98,422.20) | 0.03(0.03,0.04)    |
| <b>Lesotho</b>                          | 4,871.39(3,753.31,6,264.82)       | 268.70(209.57,341.15) | 0(0,0)             | 1,960.14(1,296.11,2,831.92)       | 112.32(74.72,160.38)  | -0.05(-0.07,-0.04) |
| <b>Liberia</b>                          | 10,045.69(7,653.92,13,140.97)     | 274.78(214.27,350.43) | 0(-0.01,0)         | 3,995.41(2,614.06,5,847.39)       | 115.42(76.20,165.50)  | 0.01(0,0.03)       |
| <b>Libya</b>                            | 44,327.00(33,932.73,59,597.62)    | 598.51(470.84,767.39) | 0.05(0.05,0.05)    | 20,061.22(13,012.93,29,522.87)    | 280.73(187.68,407.48) | 0.04(0.04,0.05)    |
| <b>Lithuania</b>                        | 12,069.02(9,532.02,14,760.72)     | 326.72(256.32,412.90) | 0(0,0)             | 5,466.25(3,504.02,7,859.61)       | 140.90(91.34,204.53)  | 0.02(0.01,0.03)    |
| <b>Luxembourg</b>                       | 4,330.87(3,421.37,5,452.14)       | 595.18(467.46,754.78) | 0(0,0)             | 2,755.35(1,799.91,3,999.89)       | 353.79(234.16,515.18) | -0.02(-0.02,-0.02) |
| <b>Madagascar</b>                       | 51,968.98(39,727.04,67,290.79)    | 268.02(208.73,340.09) | 0(0,0)             | 20,901.05(13,556.37,30,497.59)    | 114.05(75.33,163.23)  | 0.02(0.01,0.04)    |
| <b>Malawi</b>                           | 33,883.99(25,884.55,43,517.89)    | 268.58(209.25,340.82) | 0(0,0)             | 13,412.86(8,709.14,19,537.47)     | 113.82(74.47,163.27)  | 0.02(0.01,0.03)    |
| <b>Malaysia</b>                         | 210,158.20(165,068.05,270,526.73) | 653.17(513.72,827.00) | 0.31(0.3,0.32)     | 94,628.08(62,812.15,138,635.30)   | 299.87(200.25,437.37) | 0.38(0.36,0.4)     |
| <b>Maldives</b>                         | 4,151.53(3,152.41,5,474.69)       | 770.84(606.65,983.67) | -0.03(-0.03,-0.03) | 1,898.20(1,229.68,2,809.25)       | 376.19(247.72,547.76) | 0(-0.01,0.01)      |
| <b>Mali</b>                             | 38,394.63(29,482.03,48,684.06)    | 275.82(215.19,351.90) | -0.01(-0.01,-0.01) | 15,342.59(9,981.25,22,087.18)     | 117.52(77.33,168.32)  | 0.01(0.01,0.02)    |
| <b>Malta</b>                            | 3,135.33(2,500.01,3,895.33)       | 594.81(466.85,753.78) | -0.01(-0.01,-0.01) | 2,037.16(1,360.45,2,950.58)       | 354.71(235.43,514.84) | -0.02(-0.03,-0.02) |
| <b>Marshall Islands</b>                 | 350.04(273.69,454.02)             | 676.09(535.42,854.06) | 0.01(0.01,0.01)    | 156.72(101.08,227.13)             | 315.76(207.02,452.23) | -0.02(-0.02,-0.02) |
| <b>Mauritania</b>                       | 8,281.23(6,361.71,10,578.40)      | 276.73(215.90,353.01) | 0(0,0)             | 3,381.01(2,214.05,4,898.82)       | 118.54(77.41,171.44)  | 0.01(0,0.01)       |
| <b>Mauritius</b>                        | 12,230.01(9,610.50,15,538.73)     | 776.94(611.18,990.59) | 0(0,0)             | 6,150.90(4,057.76,8,962.71)       | 376.28(250.91,547.85) | -0.01(-0.02,-0.01) |
| <b>Mexico</b>                           | 485,590.38(379,047.28,626,707.52) | 377.28(296.90,480.24) | 0(0,0)             | 202,653.99(134,734.70,296,442.60) | 157.83(104.51,229.16) | 0.01(0,0.01)       |
| <b>Micronesia (Federated States of)</b> | 634.10(491.45,812.74)             | 676.17(535.51,853.90) | 0.01(0.01,0.01)    | 289.35(187.67,417.53)             | 318.36(208.32,456.26) | 0(0,0.01)          |
| <b>Monaco</b>                           | 273.92(215.40,340.77)             | 597.87(469.41,758.44) | 0.01(0,0.01)       | 184.20(121.06,265.90)             | 356.32(232.02,513.74) | -0.02(-0.02,-0.01) |
| <b>Mongolia</b>                         | 10,887.49(8,337.22,14,240.41)     | 326.58(256.19,412.63) | 0(0,0)             | 4,628.69(2,974.27,6,795.17)       | 141.28(91.57,203.84)  | 0.01(0.01,0.02)    |
| <b>Montenegro</b>                       | 2,518.80(1,984.98,3,154.11)       | 326.12(255.69,412.13) | 0(0,0)             | 1,122.74(730.63,1,631.42)         | 140.56(92.13,205.62)  | -0.01(-0.01,0)     |
| <b>Morocco</b>                          | 223,898.34(174,038.94,290,470.79) | 602.84(473.83,774.96) | -0.01(-0.01,-0.01) | 104,105.83(68,398.72,152,467.11)  | 283.97(188.13,414.42) | -0.02(-0.02,-0.01) |
| <b>Mozambique</b>                       | 51,140.33(38,994.95,65,744.08)    | 269.17(209.64,341.44) | 0(0,0)             | 20,142.11(13,133.42,29,431.70)    | 113.31(74.44,163.13)  | 0.01(-0.01,0.02)   |
| <b>Myanmar</b>                          | 429,048.17(334,675.22,554,192.01) | 778.63(613.20,992.54) | 0(0,0)             | 206,279.76(135,511.48,301,417.54) | 380.07(252.17,552.64) | 0.02(0.01,0.03)    |
| <b>Namibia</b>                          | 5,372.41(4,106.87,6,923.02)       | 269.08(209.67,341.56) | 0.01(0.01,0.01)    | 2,182.06(1,432.02,3,143.12)       | 113.51(75.64,161.05)  | 0(-0.01,0)         |
| <b>Nauru</b>                            | 57.20(43.90,75.02)                | 678.63(538.37,855.95) | 0.02(0.02,0.02)    | 24.97(15.96,36.27)                | 320.14(208.71,461.20) | 0.02(0.01,0.03)    |
| <b>Nepal</b>                            | 89,641.03(70,148.62,114,100.47)   | 327.08(256.46,413.23) | 0.01(0.01,0.01)    | 37,424.03(24,095.35,54,104.06)    | 139.65(89.36,200.61)  | 0.04(0.03,0.04)    |



|                                         |                                       |                           |                    |                                   |                       |                    |
|-----------------------------------------|---------------------------------------|---------------------------|--------------------|-----------------------------------|-----------------------|--------------------|
| <b>Netherlands</b>                      | 111,739.04(88,262.22,138,780.01)      | 556.51(443.18,706.44)     | -0.01(-0.04,0.02)  | 70,716.58(46,204.96,102,099.27)   | 322.49(212.27,467.28) | -0.01(-0.06,0.03)  |
| <b>New Zealand</b>                      | 11,775.24(9,507.56,14,548.15)         | 212.70(170.55,262.98)     | -0.91(-0.92,-0.91) | 4,897.83(3,259.16,6,911.84)       | 86.06(56.47,122.89)   | -0.99(-1,-0.98)    |
| <b>Nicaragua</b>                        | 18,575.47(14,300.20,23,910.06)        | 313.92(244.80,397.73)     | 0(0,0)             | 7,756.99(5,078.33,11,298.93)      | 134.93(89.12,194.40)  | 0.01(0.01,0.01)    |
| <b>Niger</b>                            | 37,072.78(28,431.77,47,067.52)        | 276.95(216.12,353.24)     | 0.02(0.02,0.02)    | 14,730.08(9,592.55,21,234.29)     | 118.48(78.77,169.63)  | 0.04(0.04,0.05)    |
| <b>Nigeria</b>                          | 513,547.39(394,156.55,667,072.67)     | 348.46(274.27,443.56)     | 0.16(0.15,0.18)    | 205,478.40(133,133.16,299,690.34) | 147.77(96.27,213.10)  | 0.19(0.18,0.2)     |
| <b>Niue</b>                             | 12.53(9.86,15.75)                     | 676.45(535.75,854.81)     | 0(0,0)             | 6.08(3.92,8.78)                   | 317.46(206.72,456.22) | -0.03(-0.04,-0.03) |
| <b>North Macedonia</b>                  | 8,885.40(6,998.41,11,224.70)          | 325.61(255.28,411.21)     | 0(0,0)             | 3,943.53(2,576.14,5,724.62)       | 140.24(91.27,202.71)  | 0(-0.01,0)         |
| <b>Northern Mariana Islands</b>         | 345.09(263.86,458.50)                 | 674.49(533.71,853.18)     | 0.03(0.02,0.05)    | 170.76(108.81,253.42)             | 318.17(206.74,456.86) | 0.04(0.02,0.07)    |
| <b>Norway</b>                           | 36,125.41(28,450.89,44,553.37)        | 576.71(453.67,723.40)     | -0.44(-0.53,-0.36) | 17,333.76(11,427.04,25,110.68)    | 265.20(174.84,380.08) | -0.64(-0.71,-0.56) |
| <b>Oman</b>                             | 26,383.76(19,791.20,35,700.93)        | 567.83(446.09,724.06)     | -0.04(-0.1,0.03)   | 11,150.07(7,101.51,16,784.14)     | 265.01(178.77,383.80) | -0.04(-0.16,0.07)  |
| <b>Pakistan</b>                         | 670,778.59(517,978.40,865,745.14)     | 391.86(306.12,493.25)     | 0.01(0.01,0.01)    | 267,531.48(174,668.08,393,466.33) | 162.87(107.95,235.97) | 0(0,0.01)          |
| <b>Palau</b>                            | 150.02(116.62,194.12)                 | 671.18(531.42,847.71)     | -0.02(-0.03,-0.02) | 72.56(46.62,105.73)               | 314.75(205.18,449.05) | -0.05(-0.06,-0.03) |
| <b>Palestine</b>                        | 23,148.01(17,783.42,30,171.69)        | 601.22(472.72,772.97)     | -0.04(-0.04,-0.04) | 10,108.69(6,549.07,14,844.30)     | 281.72(185.60,412.07) | -0.07(-0.08,-0.07) |
| <b>Panama</b>                           | 13,169.56(10,258.44,16,758.19)        | 313.11(244.01,396.93)     | 0(0,0)             | 5,671.70(3,741.38,8,190.27)       | 134.74(89.18,193.91)  | 0(-0.01,0)         |
| <b>Papua New Guinea</b>                 | 54,019.50(41,939.16,70,364.88)        | 675.49(534.64,854.76)     | 0(0,0)             | 23,706.09(15,262.00,33,886.85)    | 315.40(206.46,449.11) | 0(-0.01,0)         |
| <b>Paraguay</b>                         | 24,718.42(19,174.99,32,104.62)        | 373.41(290.92,478.21)     | 0(0,0)             | 10,622.92(6,906.24,15,375.51)     | 164.29(107.15,237.97) | 0(-0.01,0)         |
| <b>Peru</b>                             | 107,956.83(83,851.01,137,686.46)      | 313.44(244.27,397.42)     | 0(0,0)             | 46,419.84(30,404.02,66,807.32)    | 135.57(89.14,195.15)  | 0.01(0,0.02)       |
| <b>Philippines</b>                      | 1,183,462.67(923,660.00,1,514,634.33) | 1,156.25(917.09,1,461.47) | 0(0,0)             | 525,552.08(345,862.98,766,353.09) | 530.07(350.59,764.80) | 0.01(0.01,0.01)    |
| <b>Poland</b>                           | 199,317.91(157,802.90,250,508.87)     | 392.75(306.94,494.38)     | 0(0,0)             | 86,640.27(56,630.40,125,217.47)   | 165.05(109.52,239.48) | 0.02(0.02,0.02)    |
| <b>Portugal</b>                         | 77,999.20(61,946.61,97,138.50)        | 597.91(469.09,758.36)     | 0(0,0)             | 51,440.39(33,715.32,74,087.71)    | 357.15(236.75,519.85) | 0.01(0,0.01)       |
| <b>Puerto Rico</b>                      | 14,277.88(11,323.37,17,770.22)        | 313.99(244.91,397.87)     | 0(0,0)             | 6,439.40(4,302.15,9,257.01)       | 135.16(88.58,193.74)  | -0.01(-0.01,0)     |
| <b>Qatar</b>                            | 18,094.95(13,388.28,24,750.13)        | 547.01(429.56,697.75)     | -0.05(-0.06,-0.04) | 7,559.60(4,851.63,11,433.14)      | 247.62(165.92,357.44) | -0.11(-0.12,-0.09) |
| <b>Republic of Korea</b>                | 258,217.02(201,520.01,332,444.35)     | 356.64(279.43,458.59)     | -0.04(-0.15,0.07)  | 132,335.85(86,384.50,194,651.27)  | 171.97(112.56,247.48) | -0.01(-0.03,0.02)  |
| <b>Republic of Moldova</b>              | 15,539.78(12,250.32,19,596.56)        | 326.55(256.21,412.51)     | -0.01(-0.01,-0.01) | 6,900.12(4,525.62,10,003.79)      | 140.82(92.27,203.64)  | 0.01(0.01,0.02)    |
| <b>Romania</b>                          | 83,135.61(65,682.92,103,276.62)       | 326.05(255.76,411.95)     | 0(0,0)             | 37,643.02(24,558.04,54,615.80)    | 140.84(91.21,205.25)  | 0.02(0.01,0.02)    |
| <b>Russian Federation</b>               | 733,935.86(574,953.77,923,934.39)     | 393.79(307.75,495.45)     | 0(0,0)             | 316,503.24(206,819.75,456,661.41) | 164.90(109.57,238.37) | 0.01(0.01,0.02)    |
| <b>Rwanda</b>                           | 26,224.92(20,128.50,34,000.42)        | 269.34(209.91,341.91)     | 0(0,0)             | 10,567.07(6,830.29,15,320.16)     | 114.37(74.59,164.91)  | 0.02(0,0.03)       |
| <b>Saint Kitts and Nevis</b>            | 219.44(168.74,282.42)                 | 313.01(244.10,396.66)     | -0.01(-0.01,-0.01) | 95.89(61.61,139.18)               | 134.53(88.78,192.81)  | -0.01(-0.02,0)     |
| <b>Saint Lucia</b>                      | 650.79(507.84,829.59)                 | 313.29(244.25,397.12)     | -0.01(-0.01,-0.01) | 284.04(186.97,414.28)             | 134.24(89.10,194.03)  | -0.01(-0.01,-0.01) |
| <b>Saint Vincent and the Grenadines</b> | 398.09(310.33,504.34)                 | 312.72(243.78,396.67)     | -0.01(-0.01,-0.01) | 173.69(113.63,253.18)             | 134.05(88.26,194.17)  | -0.03(-0.03,-0.02) |
| <b>Samoa</b>                            | 1,219.39(952.76,1,550.63)             | 675.14(534.53,853.43)     | 0(0,0)             | 556.01(359.35,805.09)             | 318.07(205.87,455.16) | -0.02(-0.02,-0.01) |
| <b>San Marino</b>                       | 232.36(184.22,289.07)                 | 599.70(470.84,760.80)     | 0.03(0.02,0.03)    | 150.73(98.17,218.38)              | 358.10(235.99,517.64) | 0.02(0.01,0.02)    |
| <b>Sao Tome and Principe</b>            | 457.65(349.92,590.93)                 | 275.65(214.95,351.52)     | -0.02(-0.02,-0.02) | 187.01(121.80,272.12)             | 117.92(77.45,169.46)  | -0.02(-0.02,-      |

|                                   |                                   |                       |                    |                                   |                       |                    |
|-----------------------------------|-----------------------------------|-----------------------|--------------------|-----------------------------------|-----------------------|--------------------|
|                                   |                                   |                       |                    |                                   |                       | 0.01)              |
| <b>Saudi Arabia</b>               | 231,329.14(172,638.58,310,834.44) | 580.19(455.89,741.83) | 0.01(0.01,0.01)    | 100,131.77(64,563.40,148,661.79)  | 268.59(178.87,389.36) | 0(0,0)             |
| <b>Senegal</b>                    | 30,885.61(23,702.72,39,578.20)    | 276.83(216.02,353.16) | 0(0,0)             | 12,519.70(8,185.79,18,112.85)     | 117.96(78.94,169.26)  | 0.01(0.01,0.02)    |
| <b>Serbia</b>                     | 36,383.01(28,958.21,44,998.28)    | 325.98(255.61,411.80) | 0(0,0)             | 16,299.51(10,744.07,23,335.89)    | 140.30(92.59,203.46)  | 0(-0.01,0)         |
| <b>Seychelles</b>                 | 920.43(715.75,1,183.34)           | 774.53(608.55,987.91) | -0.01(-0.01,-0.01) | 453.67(298.60,660.43)             | 376.88(250.45,544.52) | -0.03(-0.03,-0.03) |
| <b>Sierra Leone</b>               | 16,430.23(12,577.79,21,284.84)    | 275.45(214.84,351.23) | -0.01(-0.01,-0.01) | 6,582.07(4,275.42,9,572.11)       | 117.23(77.36,168.50)  | 0.01(0,0.02)       |
| <b>Singapore</b>                  | 26,929.08(20,970.17,35,032.14)    | 356.76(279.75,457.67) | -0.02(-0.03,0)     | 13,399.14(8,738.75,19,502.61)     | 172.18(113.96,248.75) | -0.01(-0.04,0.01)  |
| <b>Slovakia</b>                   | 23,246.35(18,398.39,29,275.82)    | 326.11(255.78,411.99) | 0(0,0)             | 10,372.26(6,710.40,14,891.21)     | 140.44(91.48,202.96)  | 0(-0.01,0)         |
| <b>Slovenia</b>                   | 9,133.12(7,242.35,11,344.51)      | 325.66(255.37,411.14) | -0.01(-0.01,-0.01) | 4,119.77(2,643.94,5,922.02)       | 140.06(90.44,202.11)  | 0(-0.01,0.01)      |
| <b>Solomon Islands</b>            | 3,476.63(2,703.51,4,510.87)       | 676.77(535.97,855.94) | 0.01(0.01,0.01)    | 1,529.50(980.05,2,191.85)         | 317.64(208.38,455.80) | 0(0,0.01)          |
| <b>Somalia</b>                    | 34,730.88(26,576.10,45,360.41)    | 268.48(209.38,340.99) | 0(0,0)             | 13,665.18(8,740.55,20,008.56)     | 113.93(74.60,164.37)  | 0.01(0.01,0.02)    |
| <b>South Africa</b>               | 178,028.46(138,187.91,230,122.43) | 322.82(255.27,410.36) | 0(0,0)             | 72,624.97(47,661.17,105,758.94)   | 133.57(88.16,190.57)  | -0.02(-0.03,-0.02) |
| <b>South Sudan</b>                | 17,108.43(12,995.76,22,045.63)    | 268.04(208.44,340.66) | 0.03(0.03,0.03)    | 6,814.00(4,419.00,9,951.03)       | 112.12(73.89,160.59)  | 0.04(0.02,0.05)    |
| <b>Spain</b>                      | 280,068.78(220,273.07,344,305.62) | 494.66(390.39,624.29) | 0(-0.01,0)         | 165,555.73(110,588.73,240,437.99) | 269.90(181.06,392.62) | -0.01(-0.03,0.02)  |
| <b>Sri Lanka</b>                  | 190,117.85(149,185.74,242,079.97) | 777.98(612.52,991.73) | 0(0,0)             | 94,561.13(62,630.52,138,196.71)   | 378.74(250.73,554.59) | 0.01(0,0.01)       |
| <b>Sudan</b>                      | 185,517.27(142,954.05,243,359.86) | 602.30(474.01,778.82) | 0(0,0)             | 80,487.43(52,630.59,117,694.42)   | 282.31(186.05,410.82) | -0.01(-0.02,-0.01) |
| <b>Suriname</b>                   | 1,925.52(1,490.10,2,449.80)       | 313.56(244.41,397.21) | 0(0,0)             | 831.80(542.68,1,213.20)           | 134.16(88.44,194.80)  | -0.01(-0.02,-0.01) |
| <b>Sweden</b>                     | 90,131.85(71,389.48,111,461.89)   | 757.55(598.39,952.07) | -0.01(-0.02,-0.01) | 55,261.72(37,069.01,79,084.89)    | 434.57(291.85,628.07) | 0.01(0,0.03)       |
| <b>Switzerland</b>                | 62,260.13(49,033.15,77,402.38)    | 595.31(467.42,754.76) | 0(0,0)             | 40,377.21(26,298.55,58,448.28)    | 354.71(231.07,511.38) | 0.01(0,0.01)       |
| <b>Syrian Arab Republic</b>       | 87,383.80(67,302.00,112,607.95)   | 608.27(478.87,787.13) | 0.05(0.04,0.06)    | 41,033.61(26,713.67,60,136.87)    | 285.23(189.55,415.68) | 0.03(0.02,0.03)    |
| <b>Taiwan (Province of China)</b> | 196,590.90(161,017.04,238,205.51) | 613.75(506.43,735.49) | -0.3(-0.3,-0.3)    | 98,925.54(66,453.24,137,219.78)   | 292.97(197.84,405.61) | -0.29(-0.3,-0.27)  |
| <b>Tajikistan</b>                 | 26,249.80(20,149.58,34,012.74)    | 326.02(255.59,411.77) | 0(0,0)             | 10,924.48(6,982.90,16,063.29)     | 140.96(90.70,203.77)  | -0.01(-0.02,-0.01) |
| <b>Thailand</b>                   | 703,747.59(549,559.56,901,697.83) | 777.69(612.02,991.50) | 0(0,0)             | 361,227.47(237,685.99,530,355.43) | 381.16(253.40,556.32) | 0.02(0.02,0.03)    |
| <b>Timor-Leste</b>                | 8,028.07(6,290.74,10,253.65)      | 776.91(611.34,991.08) | 0(0,0)             | 3,691.31(2,422.03,5,331.99)       | 376.45(248.23,549.81) | 0.01(-0.01,0.02)   |
| <b>Togo</b>                       | 16,817.04(12,824.34,21,754.53)    | 277.75(216.51,354.12) | 0(0,0)             | 6,823.69(4,494.14,9,847.84)       | 118.59(78.15,170.64)  | 0.01(0.01,0.01)    |
| <b>Tokelau</b>                    | 8.98(7.04,11.31)                  | 676.31(535.87,854.89) | -0.02(-0.03,-0.01) | 4.24(2.76,6.07)                   | 318.39(208.66,456.13) | -0.05(-0.07,-0.04) |
| <b>Tonga</b>                      | 600.73(474.79,763.06)             | 678.14(537.15,857.89) | 0(0,0)             | 278.06(180.55,398.31)             | 320.57(208.06,459.08) | -0.01(-0.01,-0.01) |
| <b>Trinidad and Tobago</b>        | 5,228.55(4,083.85,6,648.12)       | 313.05(244.01,396.63) | 0(0,0)             | 2,288.86(1,499.48,3,331.52)       | 134.17(87.92,194.77)  | -0.01(-0.01,-0.01) |
| <b>Tunisia</b>                    | 79,382.66(62,002.19,102,496.56)   | 604.32(474.87,777.36) | 0.01(0.01,0.01)    | 37,855.99(24,817.50,55,427.32)    | 285.97(187.96,415.09) | 0.01(0.01,0.01)    |
| <b>Turkey</b>                     | 564,531.98(440,731.71,733,058.17) | 601.48(472.59,771.66) | 0(0,0)             | 267,435.12(174,136.91,390,415.91) | 284.83(188.62,414.82) | 0(-0.01,0)         |
| <b>Turkmenistan</b>               | 15,985.98(12,369.96,20,566.92)    | 325.91(255.65,411.66) | -0.01(-0.01,-0.01) | 6,834.93(4,445.44,10,020.08)      | 141.31(91.85,204.31)  | -0.01(-0.02,0)     |
| <b>Tuvalu</b>                     | 76.48(60.25,96.72)                | 675.12(534.85,851.68) | -0.03(-0.04,-0.03) | 35.55(23.11,50.94)                | 318.35(206.75,458.55) | -0.06(-0.07,-0.05) |

|                                           |                                         |                         |                    |                                         |                       |                    |
|-------------------------------------------|-----------------------------------------|-------------------------|--------------------|-----------------------------------------|-----------------------|--------------------|
| <b>Uganda</b>                             | 69,664.63(53,027.83,89,555.20)          | 269.07(209.58,341.44)   | 0.01(0.01,0.01)    | 27,428.72(17,736.44,40,417.57)          | 114.11(74.18,164.57)  | 0.05(0.05,0.06)    |
| <b>Ukraine</b>                            | 228,590.45(179,295.81,285,923.27)       | 393.89(307.80,495.59)   | 0(0,0)             | 99,265.46(64,969.74,143,905.51)         | 165.35(109.97,237.90) | 0.01(0,0.02)       |
| <b>United Arab Emirates</b>               | 70,712.38(50,498.30,101,158.57)         | 551.03(432.80,700.38)   | -0.03(-0.04,-0.03) | 30,439.68(19,270.28,47,075.60)          | 250.68(166.55,364.05) | -0.08(-0.09,-0.07) |
| <b>United Kingdom</b>                     | 662,700.79(527,440.56,810,120.42)       | 851.18(675.90,1,073.50) | 0.1(-0.3,0.5)      | 370,075.82(247,710.52,528,171.87)       | 446.79(301.97,636.94) | 0.03(-0.41,0.46)   |
| <b>United Republic of Tanzania</b>        | 106,757.11(81,587.36,137,684.22)        | 268.54(209.02,340.71)   | 0(0,0)             | 42,894.05(27,838.35,62,036.23)          | 114.00(75.42,163.63)  | 0.03(0.02,0.03)    |
| <b>United States of America</b>           | 3,654,042.78(2,953,518.69,4,414,295.50) | 957.71(771.71,1,170.78) | 0.45(0.18,0.72)    | 2,043,518.34(1,392,664.75,2,886,397.13) | 500.26(338.92,704.86) | 0.58(0.31,0.86)    |
| <b>United States Virgin Islands</b>       | 408.25(319.44,515.23)                   | 314.18(245.09,398.18)   | 0(0,0)             | 185.17(120.75,265.77)                   | 135.37(88.01,194.81)  | -0.01(-0.01,-0.01) |
| <b>Uruguay</b>                            | 15,874.59(12,547.90,19,702.23)          | 397.07(310.56,501.83)   | 0(0,0)             | 7,976.21(5,224.38,11,376.75)            | 192.58(126.14,276.69) | 0(0,0)             |
| <b>Uzbekistan</b>                         | 102,091.82(78,239.59,132,522.57)        | 326.47(256.03,412.57)   | 0(0,0)             | 43,027.11(27,794.33,63,007.31)          | 141.22(92.24,203.15)  | 0(0,0)             |
| <b>Vanuatu</b>                            | 1,620.44(1,272.88,2,088.80)             | 676.28(535.40,855.86)   | 0.01(0.01,0.01)    | 722.01(470.74,1,031.92)                 | 317.15(206.85,456.96) | 0.01(0,0.02)       |
| <b>Venezuela (Bolivarian Republic of)</b> | 94,918.17(73,593.97,121,158.37)         | 313.57(244.46,397.34)   | 0(0,0)             | 41,118.37(26,872.08,59,786.52)          | 135.09(88.89,195.51)  | 0(0,0.01)          |
| <b>Viet Nam</b>                           | 842,272.99(652,173.41,1,086,995.37)     | 776.93(611.27,990.33)   | -0.01(-0.01,-0.01) | 412,121.99(269,300.55,604,239.35)       | 381.91(251.97,557.69) | 0(-0.01,0)         |
| <b>Yemen</b>                              | 138,483.17(107,024.16,181,749.34)       | 602.56(473.66,774.31)   | 0(0,0)             | 59,349.95(38,887.70,86,823.84)          | 282.59(186.49,408.26) | 0.01(0,0.01)       |
| <b>Zambia</b>                             | 33,726.53(25,605.53,43,989.35)          | 267.66(208.63,339.72)   | 0(0,0)             | 13,300.54(8,509.98,19,518.70)           | 113.05(74.39,163.22)  | 0(-0.01,0.01)      |
| <b>Zimbabwe</b>                           | 30,281.72(23,169.48,39,313.93)          | 269.43(209.91,342.02)   | 0.02(0.01,0.02)    | 12,128.49(7,867.29,17,638.76)           | 113.71(74.99,162.88)  | 0(-0.01,0.01)      |

**Table S12.** The numbers (2019), ASRs per 100,000 (2019), and AAPCs (1990-2019) in incidence and DALY for gout in 204 countries.

| Characteristic                   | Incident cases                     |                       |                  | DALYs                          |                                         |                  |
|----------------------------------|------------------------------------|-----------------------|------------------|--------------------------------|-----------------------------------------|------------------|
|                                  | Numbers<br>(95% UI)                | ASIR<br>(95% UI)      | AAPC<br>(95% CI) | Numbers<br>(95% UI)            | Age-standardized<br>DALYs rate (95% UI) | AAPC<br>(95% CI) |
| Afghanistan                      | 14,469.85 (11,368.84, 18,332.61)   | 85.87(68.83,108.92)   | 0.30(0.28,0.32)  | 2,113.18(1,314.35,3,065.94)    | 13.25(8.27,19.22)                       | 0.30(0.28,0.32)  |
| Albania                          | 2,358.20 (1,861.12, 2,982.15)      | 60.77(48.14,76.07)    | 0.31(0.29,0.34)  | 379.22(233.88,564.56)          | 9.60(5.98,14.38)                        | 0.31(0.29,0.34)  |
| Algeria                          | 36,289.52 (28,879.61, 45,641.19)   | 97.16(77.31,122.64)   | 0.44(0.42,0.45)  | 5,821.61(3,631.63,8,416.04)    | 15.87(9.92,22.99)                       | 0.44(0.42,0.45)  |
| American Samoa                   | 81.34 (63.91, 102.57)              | 162.34(128.93,205.39) | 0.26(0.23,0.28)  | 13.52(8.49,19.72)              | 27.16(17.20,39.19)                      | 0.26(0.23,0.28)  |
| Andorra                          | 116.96 (92.49, 148.92)             | 88.89(70.71,112.28)   | 0.22(0.17,0.27)  | 28.28(17.49,41.95)             | 20.80(12.83,30.59)                      | 0.22(0.17,0.27)  |
| Angola                           | 12,831.95 (10,080.52, 16,079.52)   | 91.05(72.83,115.67)   | 0.12(0.11,0.14)  | 1,935.28(1,199.83,2,775.53)    | 14.49(8.95,21.20)                       | 0.12(0.11,0.14)  |
| Antigua and Barbuda              | 50.24 (39.74, 62.58)               | 48.63(38.79,60.33)    | 0.61(0.59,0.63)  | 8.23(5.01,11.89)               | 7.88(4.80,11.35)                        | 0.61(0.59,0.63)  |
| Argentina                        | 67,981.59 (54,227.09, 84,773.92)   | 132.65(105.82,164.83) | 0.52(0.49,0.55)  | 14,753.88(9,286.48,21,201.36)  | 28.37(17.91,40.92)                      | 0.52(0.49,0.55)  |
| Armenia                          | 3,108.87 (2,469.13, 3,966.24)      | 79.07(62.95,99.56)    | 0.41(0.4,0.42)   | 511.98(317.24,756.69)          | 12.89(8.19,18.95)                       | 0.41(0.4,0.42)   |
| Australia                        | 65,421.60 (52,121.35, 82,590.50)   | 182.72(146.88,231.09) | 0.92(0.84,1.01)  | 16,438.90(10,389.12,23,849.46) | 43.19(27.39,62.45)                      | 0.92(0.84,1.01)  |
| Austria                          | 12,095.93 (9,566.89, 15,374.51)    | 84.14(67.20,106.33)   | 0.33(0.28,0.39)  | 2,944.77(1,845.23,4,364.99)    | 19.08(11.93,28.05)                      | 0.33(0.28,0.39)  |
| Azerbaijan                       | 8,591.91 (6,750.26, 10,768.25)     | 81.64(65.26,101.81)   | 0.51(0.49,0.54)  | 1,387.57(861.91,2,034.68)      | 13.35(8.47,19.23)                       | 0.51(0.49,0.54)  |
| Bahamas                          | 202.67 (160.19, 251.76)            | 49.24(39.52,60.86)    | 0.5(0.48,0.52)   | 33.28(20.16,48.50)             | 8.03(4.95,11.69)                        | 0.5(0.48,0.52)   |
| Bahrain                          | 1,818.14 (1,375.80, 2,311.07)      | 115.41(91.62,144.32)  | 0.42(0.4,0.45)   | 290.82(180.04,433.51)          | 18.90(12.04,27.49)                      | 0.42(0.4,0.45)   |
| Bangladesh                       | 103,255.79 (81,872.00, 129,416.77) | 74.29(58.78,94.02)    | 0.06(0.03,0.08)  | 16,001.76(9,851.88,23,371.81)  | 11.66(7.18,17.22)                       | 0.06(0.03,0.08)  |
| Barbados                         | 211.11 (167.80, 267.65)            | 49.60(39.54,62.07)    | 0.61(0.6,0.62)   | 35.18(21.60,51.41)             | 8.11(5.08,11.72)                        | 0.61(0.6,0.62)   |
| Belarus                          | 11,214.87 (8,934.21, 14,355.91)    | 77.92(62.21,98.31)    | 0.37(0.35,0.38)  | 1,823.15(1,125.61,2,670.51)    | 12.42(7.69,17.98)                       | 0.37(0.35,0.38)  |
| Belgium                          | 15,018.97 (11,794.55, 18,962.33)   | 83.49(66.26,104.79)   | 0.22(0.16,0.29)  | 3,668.36(2,309.76,5,333.11)    | 18.92(11.92,27.57)                      | 0.22(0.16,0.29)  |
| Belize                           | 169.93 (133.90, 210.80)            | 52.13(41.34,65.09)    | 0.65(0.62,0.68)  | 27.49(17.23,40.48)             | 8.57(5.37,12.60)                        | 0.65(0.62,0.68)  |
| Benin                            | 5,495.78 (4,373.69, 6,842.27)      | 90.84(72.17,114.29)   | 0.31(0.3,0.32)   | 849.68(522.39,1,229.31)        | 14.74(9.05,21.43)                       | 0.31(0.3,0.32)   |
| Bermuda                          | 53.96 (42.83, 68.96)               | 51.41(41.01,63.96)    | 0.4(0.37,0.43)   | 9.17(5.79,13.50)               | 8.52(5.36,12.45)                        | 0.4(0.37,0.43)   |
| Bhutan                           | 499.21 (394.95, 617.87)            | 79.27(62.91,99.27)    | 0.4(0.37,0.43)   | 77.32(48.11,113.62)            | 12.56(7.81,18.26)                       | 0.4(0.37,0.43)   |
| Bolivia (Plurinational State of) | 5,203.24 (4,142.53, 6,458.79)      | 52.95(42.50,65.94)    | 0.77(0.75,0.78)  | 833.90(511.48,1,223.55)        | 8.60(5.33,12.61)                        | 0.77(0.75,0.78)  |
| Bosnia and Herzegovina           | 3,193.51 (2,529.74, 4,130.28)      | 60.52(48.18,76.41)    | 0.44(0.42,0.46)  | 507.14(309.33,753.19)          | 9.42(5.80,13.92)                        | 0.44(0.42,0.46)  |
| Botswana                         | 1,803.28 (1,422.95, 2,236.57)      | 105.61(84.36,131.27)  | 0.46(0.43,0.49)  | 276.15(171.11,399.68)          | 16.91(10.56,24.64)                      | 0.46(0.43,0.49)  |
| Brazil                           | 121,375.21 (96,996.36, 150,779.19) | 50.35(40.42,62.54)    | 0.66(0.65,0.68)  | 19,550.66(12,433.51,28,144.98) | 8.07(5.13,11.56)                        | 0.66(0.65,0.68)  |
| Brunei Darussalam                | 477.46 (373.20, 601.94)            | 116.92(92.50,146.94)  | 0.25(0.2,0.29)   | 89.78(54.80,131.21)            | 23.45(14.59,33.93)                      | 0.25(0.2,0.29)   |
| Bulgaria                         | 7,603.61 (6,044.87, 9,703.80)      | 63.09(50.39,79.58)    | 0.27(0.26,0.29)  | 1,232.83(768.21,1,842.87)      | 9.96(6.22,14.64)                        | 0.27(0.26,0.29)  |
| Burkina Faso                     | 9,423.28 (7,465.35, 11,645.72)     | 84.57(67.22,106.35)   | 0.17(0.15,0.19)  | 1,443.23(909.74,2,089.75)      | 13.53(8.61,19.68)                       | 0.17(0.15,0.19)  |
| Burundi                          | 5,131.84 (4,051.04, 6,464.65)      | 91.21(72.77,116.67)   | 0.27(0.24,0.3)   | 770.66(473.98,1,136.62)        | 14.42(8.74,21.30)                       | 0.27(0.24,0.3)   |
| Cabo Verde                       | 426.85 (340.99, 530.39)            | 90.04(71.75,112.37)   | 0.5(0.49,0.51)   | 67.72(42.33,99.00)             | 14.58(9.06,21.62)                       | 0.5(0.49,0.51)   |
| Cambodia                         | 14,960.70 (11,810.11, 18,690.77)   | 109.51(87.47,137.28)  | 0.34(0.32,0.36)  | 2,336.16(1,420.01,3,373.19)    | 17.50(10.58,25.27)                      | 0.34(0.32,0.36)  |
| Cameroon                         | 14,336.40 (11,330.73, 17,962.79)   | 95.28(76.06,121.37)   | 0.18(0.17,0.19)  | 2,209.39(1,358.54,3,198.58)    | 15.46(9.62,22.72)                       | 0.18(0.17,0.19)  |
| Canada                           | 106,196.95 (84,942.64, 133,971.54) | 191.48(153.39,236.15) | 0.7(0.67,0.73)   | 27,127.72(16,778.83,39,610.40) | 46.08(28.87,66.15)                      | 0.7(0.67,0.73)   |
| Central African Republic         | 2,367.17 (1,835.83, 2,970.53)      | 87.15(69.09,109.33)   | 0.11(0.09,0.12)  | 350.77(216.04,513.17)          | 13.60(8.58,19.74)                       | 0.11(0.09,0.12)  |
| Chad                             | 5,901.22 (4,691.58, 7,273.94)      | 87.18(69.87,109.18)   | 0.32(0.31,0.33)  | 894.21(556.70,1,305.74)        | 13.81(8.64,20.19)                       | 0.32(0.31,0.33)  |
| Chile                            | 30,992.68 (24,541.87, 38,983.06)   | 135.39(107.16,169.70) | 0.49(0.47,0.51)  | 6,745.16(4,170.18,9,640.94)    | 28.93(17.87,41.31)                      | 0.49(0.47,0.51)  |

|                                              |                                           |                       |                  |                                   |                    |                  |
|----------------------------------------------|-------------------------------------------|-----------------------|------------------|-----------------------------------|--------------------|------------------|
| <b>China</b>                                 | 3,041,329.26 (2,419,081.68, 3,870,096.45) | 152.83(122.69,191.37) | 0.83(0.74,0.92)  | 510,485.16(314,773.53,737,830.14) | 25.33(15.95,36.47) | 0.83(0.74,0.92)  |
| <b>Colombia</b>                              | 17,407.04 (13,770.07, 21,812.21)          | 33.23(26.31,41.57)    | 0.57(0.56,0.58)  | 2,857.16(1,741.27,4,101.20)       | 5.45(3.33,7.80)    | 0.57(0.56,0.58)  |
| <b>Comoros</b>                               | 492.53 (390.18, 617.97)                   | 91.70(73.11,115.38)   | 0.15(0.13,0.18)  | 77.32(47.96,111.97)               | 14.73(9.19,21.40)  | 0.15(0.13,0.18)  |
| <b>Congo</b>                                 | 3,206.61 (2,510.08, 4,050.06)             | 98.85(78.85,125.18)   | 0.41(0.4,0.42)   | 495.17(299.47,713.97)             | 15.95(9.81,23.11)  | 0.41(0.4,0.42)   |
| <b>Cook Islands</b>                          | 37.28 (29.55, 47.38)                      | 162.06(128.78,203.27) | 0.32(0.27,0.36)  | 6.42(4.01,9.32)                   | 27.42(17.36,39.39) | 0.32(0.27,0.36)  |
| <b>Costa Rica</b>                            | 1,794.26 (1,421.18, 2,242.69)             | 34.45(27.35,42.93)    | 0.59(0.56,0.62)  | 294.74(182.95,432.60)             | 5.65(3.52,8.28)    | 0.59(0.56,0.62)  |
| <b>Croatia</b>                               | 4,522.75 (3,586.10, 5,801.66)             | 62.77(50.16,79.44)    | 0.11(0.1,0.13)   | 726.64(459.57,1,053.79)           | 9.83(6.17,14.38)   | 0.11(0.1,0.13)   |
| <b>Cuba</b>                                  | 8,003.18 (6,391.37, 10,129.41)            | 48.16(38.62,59.77)    | 0.45(0.42,0.47)  | 1,317.19(823.19,1,944.95)         | 7.77(4.85,11.45)   | 0.45(0.42,0.47)  |
| <b>Cyprus</b>                                | 1,506.08 (1,188.70, 1,882.89)             | 82.59(65.48,103.15)   | 0.52(0.51,0.54)  | 351.12(216.25,513.38)             | 18.79(11.59,27.36) | 0.52(0.51,0.54)  |
| <b>Czechia</b>                               | 11,268.47 (8,943.15, 14,198.48)           | 63.77(50.65,79.74)    | 0.25(0.22,0.28)  | 1,800.07(1,126.18,2,640.36)       | 9.99(6.22,14.70)   | 0.25(0.22,0.28)  |
| <b>Côte d'Ivoire</b>                         | 13,009.97 (10,110.92, 16,408.60)          | 93.68(74.66,118.75)   | 0.43(0.37,0.5)   | 1,988.14(1,201.83,2,879.58)       | 15.07(9.29,22.19)  | 0.43(0.37,0.5)   |
| <b>Democratic People's Republic of Korea</b> | 46,289.75 (36,801.35, 58,668.56)          | 143.53(115.16,181.18) | 0.32(0.31,0.34)  | 7,943.44(5,062.25,11,509.87)      | 24.50(15.70,35.31) | 0.32(0.31,0.34)  |
| <b>Democratic Republic of the Congo</b>      | 39,363.66 (30,977.52, 49,154.80)          | 88.87(70.57,112.25)   | 0.01(-0.01,0.02) | 5,891.22(3,663.72,8,595.05)       | 13.96(8.60,20.26)  | 0.01(-0.01,0.02) |
| <b>Denmark</b>                               | 7,616.91 (6,005.98, 9,668.58)             | 83.00(66.02,103.88)   | 0.26(0.21,0.31)  | 1,878.23(1,161.83,2,771.06)       | 18.98(11.76,27.97) | 0.26(0.21,0.31)  |
| <b>Djibouti</b>                              | 786.28 (612.89, 990.21)                   | 102.62(81.63,128.93)  | 0.52(0.49,0.56)  | 121.75(75.26,180.98)              | 16.69(10.39,24.52) | 0.52(0.49,0.56)  |
| <b>Dominica</b>                              | 40.65 (32.47, 51.18)                      | 48.83(39.19,61.17)    | 0.68(0.67,0.69)  | 6.58(4.08,9.78)                   | 7.84(4.91,11.64)   | 0.68(0.67,0.69)  |
| <b>Dominican Republic</b>                    | 4,973.43 (3,985.42, 6,111.75)             | 49.68(39.88,61.40)    | 0.71(0.69,0.73)  | 807.00(498.05,1,150.52)           | 8.12(5.02,11.56)   | 0.71(0.69,0.73)  |
| <b>Ecuador</b>                               | 9,903.67 (7,936.55, 12,043.18)            | 61.78(49.48,75.50)    | 0.85(0.81,0.9)   | 1,650.45(1,038.16,2,390.33)       | 10.38(6.55,14.92)  | 0.85(0.81,0.9)   |
| <b>Egypt</b>                                 | 74,401.98 (59,281.48, 92,867.85)          | 102.40(82.21,128.51)  | 0.47(0.44,0.5)   | 11,900.33(7,336.86,17,404.43)     | 16.87(10.47,24.40) | 0.47(0.44,0.5)   |
| <b>El Salvador</b>                           | 2,001.20 (1,597.42, 2,476.61)             | 33.07(26.27,41.03)    | 0.62(0.6,0.63)   | 321.29(202.14,466.54)             | 5.37(3.36,7.82)    | 0.62(0.6,0.63)   |
| <b>Equatorial Guinea</b>                     | 633.63 (498.27, 784.76)                   | 97.22(77.90,124.14)   | 0.55(0.51,0.58)  | 94.49(59.11,139.43)               | 15.63(9.77,23.03)  | 0.55(0.51,0.58)  |
| <b>Eritrea</b>                               | 3,016.66 (2,352.47, 3,777.35)             | 85.69(67.79,107.74)   | 0.25(0.24,0.27)  | 446.58(272.64,662.76)             | 13.43(8.37,19.71)  | 0.25(0.24,0.27)  |
| <b>Estonia</b>                               | 1,767.44 (1,408.00, 2,252.51)             | 82.59(65.64,103.61)   | 0.51(0.5,0.53)   | 293.65(178.68,426.42)             | 13.30(8.21,19.14)  | 0.51(0.5,0.53)   |
| <b>Eswatini</b>                              | 735.23 (582.13, 909.27)                   | 104.33(83.39,130.79)  | 0.21(0.19,0.23)  | 112.14(70.58,160.01)              | 16.69(10.61,24.24) | 0.21(0.19,0.23)  |
| <b>Ethiopia</b>                              | 49,916.24 (39,742.70, 61,878.49)          | 99.19(79.13,125.98)   | 0.23(0.21,0.25)  | 7,497.45(4,636.79,10,882.11)      | 15.62(9.70,22.79)  | 0.23(0.21,0.25)  |
| <b>Fiji</b>                                  | 1,278.97 (1,005.61, 1,597.02)             | 153.21(122.63,190.42) | 0.4(0.39,0.41)   | 207.92(128.27,301.70)             | 25.30(15.68,36.49) | 0.4(0.39,0.41)   |
| <b>Finland</b>                               | 7,773.71 (6,048.42, 9,989.75)             | 84.13(66.58,106.44)   | 0.33(0.29,0.38)  | 1,924.86(1,184.87,2,811.19)       | 19.06(11.80,27.76) | 0.33(0.29,0.38)  |
| <b>France</b>                                | 85,058.34 (66,895.26, 107,257.72)         | 81.43(64.72,102.50)   | 0.2(0.15,0.25)   | 21,145.07(13,209.83,30,907.84)    | 18.61(11.50,27.56) | 0.2(0.15,0.25)   |
| <b>Gabon</b>                                 | 1,248.05 (982.54, 1,564.60)               | 102.33(81.16,127.92)  | 0.44(0.42,0.46)  | 195.37(121.20,283.03)             | 16.58(10.36,24.35) | 0.44(0.42,0.46)  |
| <b>Gambia</b>                                | 1,052.93 (835.41, 1,304.24)               | 90.67(72.06,114.69)   | 0.12(0.11,0.13)  | 161.99(102.11,235.66)             | 14.59(9.21,21.05)  | 0.12(0.11,0.13)  |
| <b>Georgia</b>                               | 4,243.27 (3,381.29, 5,377.97)             | 80.28(63.92,100.43)   | 0.31(0.29,0.32)  | 701.39(437.70,1,045.88)           | 12.98(8.18,19.26)  | 0.31(0.29,0.32)  |
| <b>Germany</b>                               | 124,017.98 (97,134.47, 159,353.87)        | 85.27(67.93,107.52)   | 0.35(0.34,0.36)  | 30,825.90(19,414.45,45,008.18)    | 19.38(12.10,28.25) | 0.35(0.34,0.36)  |
| <b>Ghana</b>                                 | 17,346.97 (13,659.20, 21,697.72)          | 88.32(70.03,111.60)   | 0.2(0.18,0.22)   | 2,687.05(1,646.51,3,935.03)       | 14.27(8.71,21.00)  | 0.2(0.18,0.22)   |
| <b>Greece</b>                                | 15,603.19 (12,260.87, 20,009.56)          | 87.73(69.47,110.54)   | 0.22(-0.05,0.49) | 4,008.01(2,510.54,5,934.91)       | 20.51(12.82,30.40) | 0.22(-0.05,0.49) |
| <b>Greenland</b>                             | 117.50 (91.71, 150.25)                    | 169.58(135.12,212.38) | 0.54(0.5,0.58)   | 28.82(17.84,42.90)                | 40.90(25.79,59.44) | 0.54(0.5,0.58)   |
| <b>Grenada</b>                               | 53.66 (42.34, 67.38)                      | 47.37(37.70,59.05)    | 0.65(0.64,0.67)  | 8.69(5.41,12.56)                  | 7.62(4.82,10.99)   | 0.65(0.64,0.67)  |
| <b>Guam</b>                                  | 298.95 (238.95, 379.37)                   | 160.41(128.45,201.35) | 0.33(0.31,0.34)  | 51.02(31.90,75.37)                | 27.21(17.17,39.56) | 0.33(0.31,0.34)  |
| <b>Guatemala</b>                             | 4,257.86 (3,344.09, 5,258.32)             | 31.60(25.16,39.54)    | 0.58(0.57,0.59)  | 663.94(420.68,967.87)             | 5.07(3.19,7.37)    | 0.58(0.57,0.59)  |



|                                         |                                       |                       |                 |                                  |                    |                 |
|-----------------------------------------|---------------------------------------|-----------------------|-----------------|----------------------------------|--------------------|-----------------|
| <b>Guinea</b>                           | 5,582.47 (4,445.81, 6,992.59)         | 87.41(69.30,110.59)   | 0.17(0.16,0.19) | 864.59(539.39,1,264.24)          | 14.06(8.84,20.69)  | 0.17(0.16,0.19) |
| <b>Guinea-Bissau</b>                    | 779.60 (612.43, 970.82)               | 83.89(66.30,105.63)   | 0.08(0.06,0.09) | 117.24(72.89,169.34)             | 13.35(8.58,19.41)  | 0.08(0.06,0.09) |
| <b>Guyana</b>                           | 323.42 (254.64, 402.92)               | 47.04(37.44,58.67)    | 0.54(0.52,0.55) | 51.35(31.16,74.66)               | 7.51(4.62,10.90)   | 0.54(0.52,0.55) |
| <b>Haiti</b>                            | 3,747.43 (2,937.98, 4,643.81)         | 42.99(34.67,52.84)    | 0.48(0.47,0.49) | 577.30(365.00,859.19)            | 6.77(4.25,9.88)    | 0.48(0.47,0.49) |
| <b>Honduras</b>                         | 2,380.91 (1,891.79, 2,960.14)         | 32.44(25.85,40.22)    | 0.67(0.65,0.68) | 374.83(224.34,549.05)            | 5.23(3.16,7.62)    | 0.67(0.65,0.68) |
| <b>Hungary</b>                          | 10,251.71 (8,092.68, 13,014.13)       | 63.27(50.08,79.91)    | 0.32(0.31,0.34) | 1,650.96(999.30,2,433.57)        | 9.96(6.00,14.77)   | 0.32(0.31,0.34) |
| <b>Iceland</b>                          | 418.37 (331.13, 536.88)               | 87.93(70.16,111.84)   | 0.29(0.25,0.32) | 101.98(63.31,149.69)             | 20.38(12.67,29.84) | 0.29(0.25,0.32) |
| <b>India</b>                            | 958,893.47 (765,811.14, 1,208,831.06) | 78.35(62.97,98.82)    | 0.17(0.15,0.19) | 145,787.98(92,266.90,210,079.92) | 12.06(7.67,17.46)  | 0.17(0.15,0.19) |
| <b>Indonesia</b>                        | 321,221.76 (254,177.82, 404,910.48)   | 129.05(103.16,161.48) | 0.57(0.54,0.59) | 51,108.60(32,229.61,74,720.79)   | 20.74(13.12,29.99) | 0.57(0.54,0.59) |
| <b>Iran (Islamic Republic of)</b>       | 78,473.37 (61,931.82, 98,314.91)      | 95.68(76.19,121.43)   | 0.23(0.17,0.29) | 12,229.62(7,691.52,17,716.47)    | 15.15(9.53,21.99)  | 0.23(0.17,0.29) |
| <b>Iraq</b>                             | 26,851.63 (21,040.55, 33,650.19)      | 95.59(76.05,121.13)   | 0.09(0.08,0.1)  | 4,159.04(2,660.89,5,968.77)      | 15.39(10.01,22.20) | 0.09(0.08,0.1)  |
| <b>Ireland</b>                          | 5,661.53 (4,490.26, 7,187.25)         | 84.24(67.18,105.72)   | 0.2(0.17,0.22)  | 1,349.71(834.42,1,990.47)        | 19.32(11.93,28.38) | 0.2(0.17,0.22)  |
| <b>Israel</b>                           | 8,706.94 (6,924.95, 10,942.70)        | 83.46(66.50,104.84)   | 0.25(0.23,0.26) | 2,050.74(1,267.03,2,974.10)      | 19.06(11.82,27.73) | 0.25(0.23,0.26) |
| <b>Italy</b>                            | 92,501.67 (73,252.01, 116,598.94)     | 84.57(67.43,105.99)   | 0.15(0.05,0.25) | 19,711.65(12,420.19,28,511.27)   | 16.76(10.49,24.16) | 0.15(0.05,0.25) |
| <b>Jamaica</b>                          | 1,473.71 (1,187.69, 1,825.38)         | 48.73(39.20,60.40)    | 0.63(0.62,0.64) | 238.24(147.04,348.48)            | 7.91(4.90,11.57)   | 0.63(0.62,0.64) |
| <b>Japan</b>                            | 300,896.68 (239,394.61, 381,874.79)   | 122.29(97.46,153.19)  | 0.25(0.21,0.3)  | 60,116.38(37,731.24,87,163.84)   | 22.73(14.31,32.89) | 0.25(0.21,0.3)  |
| <b>Jordan</b>                           | 8,503.05 (6,621.02, 10,760.91)        | 103.27(82.40,131.34)  | 0.42(0.4,0.44)  | 1,353.44(837.21,1,980.21)        | 17.02(10.52,24.52) | 0.42(0.4,0.44)  |
| <b>Kazakhstan</b>                       | 15,239.23 (12,007.52, 19,102.80)      | 82.32(65.28,103.44)   | 0.38(0.35,0.4)  | 2,466.14(1,533.89,3,696.58)      | 13.42(8.40,19.89)  | 0.38(0.35,0.4)  |
| <b>Kenya</b>                            | 27,835.36 (22,015.38, 34,652.39)      | 101.62(80.90,128.88)  | 0.24(0.23,0.25) | 4,202.67(2,641.84,6,041.53)      | 16.03(10.16,23.21) | 0.24(0.23,0.25) |
| <b>Kiribati</b>                         | 114.18 (88.63, 144.58)                | 137.10(109.74,172.53) | 0.28(0.26,0.3)  | 17.81(10.91,25.95)               | 22.23(13.91,32.50) | 0.28(0.26,0.3)  |
| <b>Kuwait</b>                           | 4,468.74 (3,419.60, 5,599.57)         | 113.51(90.04,143.24)  | 0.16(0.11,0.22) | 713.63(432.06,1,055.36)          | 19.01(11.71,27.58) | 0.16(0.11,0.22) |
| <b>Kyrgyzstan</b>                       | 4,006.21 (3,158.52, 5,021.71)         | 76.62(61.05,96.40)    | 0.35(0.34,0.37) | 635.98(391.94,929.92)            | 12.43(7.69,18.11)  | 0.35(0.34,0.37) |
| <b>Lao People's Democratic Republic</b> | 6,409.12 (5,035.44, 8,002.19)         | 120.67(95.93,150.94)  | 0.46(0.44,0.48) | 1,005.46(602.33,1,444.21)        | 19.59(11.90,28.47) | 0.46(0.44,0.48) |
| <b>Latvia</b>                           | 2,593.10 (2,030.31, 3,369.97)         | 80.31(63.03,102.58)   | 0.41(0.39,0.42) | 429.35(269.02,638.90)            | 12.84(7.92,18.83)  | 0.41(0.39,0.42) |
| <b>Lebanon</b>                          | 5,069.21 (4,058.38, 6,345.02)         | 95.73(76.52,120.53)   | 0.26(0.24,0.28) | 820.72(515.64,1,181.93)          | 15.55(9.79,22.53)  | 0.26(0.24,0.28) |
| <b>Lesotho</b>                          | 1,432.30 (1,128.85, 1,785.97)         | 96.67(76.24,121.13)   | 0.26(0.25,0.28) | 216.01(130.77,312.34)            | 15.16(9.25,22.15)  | 0.26(0.25,0.28) |
| <b>Liberia</b>                          | 2,515.06 (1,976.41, 3,137.29)         | 95.39(75.25,121.27)   | 0.27(0.23,0.31) | 383.19(239.60,554.32)            | 15.24(9.52,22.11)  | 0.27(0.23,0.31) |
| <b>Libya</b>                            | 6,173.61 (4,849.35, 7,672.41)         | 100.14(80.08,124.88)  | 0.12(0.11,0.13) | 972.98(597.64,1,433.01)          | 16.21(10.05,23.83) | 0.12(0.11,0.13) |
| <b>Lithuania</b>                        | 3,691.72 (2,919.00, 4,728.41)         | 78.57(62.81,99.01)    | 0.32(0.31,0.32) | 606.95(369.48,896.04)            | 12.50(7.73,18.15)  | 0.32(0.31,0.32) |
| <b>Luxembourg</b>                       | 786.85 (624.97, 992.18)               | 87.73(69.75,110.15)   | 0.36(0.31,0.4)  | 187.82(117.68,278.57)            | 20.17(12.67,29.91) | 0.36(0.31,0.4)  |
| <b>Madagascar</b>                       | 12,338.54 (9,719.11, 15,340.98)       | 90.12(71.30,113.90)   | 0.07(0.06,0.08) | 1,868.00(1,153.15,2,717.27)      | 14.39(9.10,20.90)  | 0.07(0.06,0.08) |
| <b>Malawi</b>                           | 8,051.28 (6,391.62, 9,947.33)         | 90.01(72.01,113.09)   | 0.16(0.11,0.2)  | 1,216.04(764.40,1,761.66)        | 14.29(9.14,21.05)  | 0.16(0.11,0.2)  |
| <b>Malaysia</b>                         | 40,577.87 (32,297.72, 50,529.61)      | 136.85(109.27,170.95) | 0.58(0.55,0.6)  | 6,653.94(4,192.37,9,835.61)      | 22.84(14.26,33.61) | 0.58(0.55,0.6)  |
| <b>Maldives</b>                         | 619.42 (482.64, 773.08)               | 139.62(111.09,174.62) | 0.54(0.53,0.55) | 97.49(60.95,143.26)              | 23.11(14.11,33.70) | 0.54(0.53,0.55) |
| <b>Mali</b>                             | 8,865.91 (7,059.38, 11,100.42)        | 87.33(69.80,108.99)   | 0.24(0.23,0.25) | 1,367.13(850.67,2,012.45)        | 14.04(8.73,20.43)  | 0.24(0.23,0.25) |
| <b>Malta</b>                            | 635.27 (503.89, 816.91)               | 86.84(69.25,109.96)   | 0.37(0.36,0.38) | 158.42(98.13,232.12)             | 20.03(12.47,29.29) | 0.37(0.36,0.38) |
| <b>Marshall Islands</b>                 | 60.40 (47.57, 75.77)                  | 144.12(115.07,180.86) | 0.45(0.43,0.48) | 9.44(5.94,13.84)                 | 23.36(14.66,33.98) | 0.45(0.43,0.48) |
| <b>Mauritania</b>                       | 2,279.76 (1,806.67, 2,846.67)         | 96.32(76.84,121.77)   | 0.3(0.29,0.32)  | 362.76(223.65,525.89)            | 15.85(9.75,23.20)  | 0.3(0.29,0.32)  |
| <b>Mauritius</b>                        | 2,223.51 (1,760.04, 2,844.91)         | 130.33(104.23,164.73) | 0.44(0.43,0.46) | 369.81(231.24,546.27)            | 21.44(13.56,31.19) | 0.44(0.43,0.46) |
| <b>Mexico</b>                           | 47,527.96 (37,498.30, 59,179.92)      | 38.17(30.28,47.53)    | 0.39(0.34,0.45) | 7,862.12(4,985.09,11,289.42)     | 6.31(4.01,9.16)    | 0.39(0.34,0.45) |



|                                         |                                     |                       |                    |                                |                    |                    |
|-----------------------------------------|-------------------------------------|-----------------------|--------------------|--------------------------------|--------------------|--------------------|
| <b>Micronesia (Federated States of)</b> | 118.51 (93.02, 148.94)              | 145.72(117.04,181.45) | 0.25(0.21,0.28)    | 18.93(11.88,27.51)             | 23.92(15.14,34.58) | 0.25(0.21,0.28)    |
| <b>Monaco</b>                           | 60.42 (47.87, 78.31)                | 85.43(68.21,108.13)   | 0.24(0.21,0.27)    | 15.48(9.67,22.66)              | 19.76(12.25,28.95) | 0.24(0.21,0.27)    |
| <b>Mongolia</b>                         | 2,200.40 (1,706.83, 2,766.43)       | 76.92(61.08,97.50)    | 0.15(0.14,0.17)    | 344.33(210.60,510.15)          | 12.38(7.72,18.18)  | 0.15(0.14,0.17)    |
| <b>Montenegro</b>                       | 559.46 (441.86, 723.55)             | 62.46(49.66,79.15)    | 0.28(0.26,0.3)     | 89.49(55.18,132.82)            | 9.83(6.06,14.51)   | 0.28(0.26,0.3)     |
| <b>Morocco</b>                          | 31,152.84 (24,450.12, 39,270.45)    | 91.96(72.97,116.16)   | 0.35(0.34,0.37)    | 4,964.25(3,100.50,7,148.96)    | 14.85(9.24,21.50)  | 0.35(0.34,0.37)    |
| <b>Mozambique</b>                       | 11,872.96 (9,356.16, 14,879.93)     | 88.23(70.07,111.10)   | 0.16(0.14,0.17)    | 1,775.33(1,110.31,2,569.52)    | 13.87(8.65,20.25)  | 0.16(0.14,0.17)    |
| <b>Myanmar</b>                          | 57,797.54 (46,004.41, 72,640.92)    | 113.33(90.44,142.27)  | 0.25(0.24,0.27)    | 9,210.60(5,712.48,13,436.62)   | 18.27(11.38,26.94) | 0.25(0.24,0.27)    |
| <b>Namibia</b>                          | 1,591.90 (1,266.42, 1,981.55)       | 98.24(78.62,124.78)   | 0.17(0.15,0.18)    | 244.92(153.94,353.17)          | 15.63(9.77,22.90)  | 0.17(0.15,0.18)    |
| <b>Nauru</b>                            | 8.88 (6.93, 11.14)                  | 147.13(118.04,184.00) | 0.14(0.12,0.16)    | 1.38(0.86,2.01)                | 24.40(15.18,34.84) | 0.14(0.12,0.16)    |
| <b>Nepal</b>                            | 17,509.32 (13,856.04, 22,036.93)    | 72.99(58.25,92.44)    | 0.13(0.11,0.15)    | 2,686.04(1,656.50,3,920.46)    | 11.40(7.11,16.52)  | 0.13(0.11,0.15)    |
| <b>Netherlands</b>                      | 23,912.08 (18,776.09, 30,516.83)    | 86.78(68.96,109.18)   | 0.22(0.1,0.34)     | 5,976.81(3,700.06,8,712.48)    | 20.16(12.48,28.91) | 0.22(0.1,0.34)     |
| <b>New Zealand</b>                      | 13,921.57 (11,318.37, 17,015.40)    | 207.88(170.09,252.28) | 0.2(0.16,0.24)     | 3,221.40(2,118.65,4,574.12)    | 45.41(29.51,64.12) | 0.2(0.16,0.24)     |
| <b>Nicaragua</b>                        | 1,789.63 (1,397.53, 2,212.31)       | 33.20(26.32,40.96)    | 0.66(0.63,0.69)    | 286.70(178.07,426.64)          | 5.41(3.37,7.92)    | 0.66(0.63,0.69)    |
| <b>Niger</b>                            | 7,905.50 (6,239.11, 9,872.89)       | 83.74(67.06,105.18)   | -0.01(-0.03,0.01)  | 1,208.46(739.43,1,732.23)      | 13.43(8.37,19.19)  | -0.01(-0.03,0.01)  |
| <b>Nigeria</b>                          | 91,814.00 (72,551.10, 114,549.44)   | 85.08(68.17,107.32)   | -0.38(-0.43,-0.34) | 13,987.02(8,856.69,20,132.89)  | 13.50(8.48,19.43)  | -0.38(-0.43,-0.34) |
| <b>Niue</b>                             | 3.21 (2.53, 4.12)                   | 156.97(125.13,198.22) | 0.51(0.5,0.52)     | 0.54(0.34,0.79)                | 26.00(16.45,37.81) | 0.51(0.5,0.52)     |
| <b>North Macedonia</b>                  | 1,919.88 (1,501.59, 2,453.24)       | 63.14(50.05,79.68)    | 0.34(0.32,0.36)    | 305.46(188.28,457.26)          | 9.93(6.27,14.67)   | 0.34(0.32,0.36)    |
| <b>Northern Mariana Islands</b>         | 86.14 (66.75, 112.03)               | 158.41(126.49,200.02) | 0.01(-0.05,0.07)   | 14.54(8.94,21.52)              | 26.48(16.44,38.26) | 0.01(-0.05,0.07)   |
| <b>Norway</b>                           | 6,987.21 (5,527.62, 8,893.55)       | 86.80(69.04,108.68)   | 0.25(-0.06,0.56)   | 1,456.68(920.14,2,118.15)      | 17.28(10.94,24.93) | 0.25(-0.06,0.56)   |
| <b>Oman</b>                             | 3,650.77 (2,782.45, 4,600.08)       | 110.16(87.75,138.62)  | 0.72(0.56,0.88)    | 547.19(338.46,798.20)          | 17.87(11.21,25.74) | 0.72(0.56,0.88)    |
| <b>Pakistan</b>                         | 103,157.92 (80,979.80, 129,685.57)  | 79.31(63.15,100.11)   | 0.58(0.48,0.67)    | 15,492.43(9,738.80,22,524.58)  | 12.28(7.72,17.81)  | 0.58(0.48,0.67)    |
| <b>Palau</b>                            | 37.44 (29.04, 47.55)                | 164.38(130.07,206.15) | 0.5(0.47,0.53)     | 6.22(3.81,9.09)                | 27.26(17.05,39.15) | 0.5(0.47,0.53)     |
| <b>Palestine</b>                        | 2,728.50 (2,134.75, 3,399.95)       | 91.54(72.77,115.26)   | 0.26(0.25,0.27)    | 419.32(259.58,603.19)          | 14.65(9.13,21.21)  | 0.26(0.25,0.27)    |
| <b>Panama</b>                           | 1,423.21 (1,126.07, 1,783.94)       | 33.90(26.83,42.57)    | 0.81(0.79,0.83)    | 232.70(144.64,341.62)          | 5.55(3.46,8.14)    | 0.81(0.79,0.83)    |
| <b>Papua New Guinea</b>                 | 8,231.01 (6,414.31, 10,271.63)      | 135.39(108.23,168.29) | 0.26(0.25,0.27)    | 1,255.06(775.31,1,822.72)      | 21.61(13.48,31.39) | 0.26(0.25,0.27)    |
| <b>Paraguay</b>                         | 2,907.80 (2,312.05, 3,663.89)       | 47.37(37.76,60.19)    | 0.61(0.59,0.62)    | 465.91(288.90,695.85)          | 7.68(4.75,11.39)   | 0.61(0.59,0.62)    |
| <b>Peru</b>                             | 18,173.59 (14,421.34, 22,707.03)    | 54.30(43.12,67.94)    | 0.68(0.66,0.71)    | 2,982.71(1,822.72,4,405.78)    | 8.95(5.47,13.30)   | 0.68(0.66,0.71)    |
| <b>Philippines</b>                      | 109,662.69 (86,452.32, 136,932.99)  | 122.75(98.47,154.33)  | 0.73(0.71,0.74)    | 17,171.61(10,725.77,24,724.80) | 19.61(12.36,28.04) | 0.73(0.71,0.74)    |
| <b>Poland</b>                           | 40,579.84 (32,533.11, 51,377.89)    | 66.52(53.21,83.50)    | 0.44(0.42,0.45)    | 6,476.24(4,058.14,9,396.38)    | 10.43(6.53,15.13)  | 0.44(0.42,0.45)    |
| <b>Portugal</b>                         | 15,426.26 (12,080.73, 19,745.53)    | 83.46(65.86,104.57)   | 0.27(0.23,0.31)    | 3,847.31(2,403.31,5,624.41)    | 19.08(11.90,27.82) | 0.27(0.23,0.31)    |
| <b>Puerto Rico</b>                      | 3,041.48 (2,437.61, 3,816.70)       | 54.54(43.50,67.01)    | 0.57(0.56,0.59)    | 512.29(331.54,748.01)          | 9.04(5.71,13.10)   | 0.57(0.56,0.59)    |
| <b>Qatar</b>                            | 3,047.68 (2,311.39, 3,872.90)       | 137.05(109.70,174.07) | 0.53(0.51,0.56)    | 461.24(282.91,682.86)          | 22.54(14.52,32.66) | 0.53(0.51,0.56)    |
| <b>Republic of Korea</b>                | 91,577.51 (71,910.27, 115,771.72)   | 109.97(87.23,137.69)  | 0.33(0.28,0.37)    | 18,854.71(11,572.42,27,691.75) | 21.96(13.66,31.95) | 0.33(0.28,0.37)    |
| <b>Republic of Moldova</b>              | 4,244.85 (3,377.39, 5,377.64)       | 78.70(63.03,98.76)    | 0.48(0.45,0.51)    | 684.83(420.42,999.49)          | 12.52(7.77,18.17)  | 0.48(0.45,0.51)    |
| <b>Romania</b>                          | 20,105.97 (15,921.82, 25,470.31)    | 63.69(50.40,79.42)    | 0.44(0.39,0.48)    | 3,263.40(1,997.64,4,867.53)    | 10.09(6.21,14.88)  | 0.44(0.39,0.48)    |
| <b>Russian Federation</b>               | 184,226.08 (146,422.74, 235,241.06) | 85.33(68.38,107.28)   | 0.49(0.46,0.52)    | 29,358.61(18,457.60,42,963.43) | 13.39(8.37,19.40)  | 0.49(0.46,0.52)    |

|                                         |                                     |                       |                    |                                |                    |                    |
|-----------------------------------------|-------------------------------------|-----------------------|--------------------|--------------------------------|--------------------|--------------------|
| <b>Rwanda</b>                           | 6,387.61 (5,052.93, 8,078.50)       | 87.14(69.61,110.91)   | 0.12(0.08,0.16)    | 965.23(611.32,1,385.49)        | 13.79(8.63,19.94)  | 0.12(0.08,0.16)    |
| <b>Saint Kitts and Nevis</b>            | 34.84 (27.22, 43.95)                | 50.75(40.35,62.63)    | 0.68(0.67,0.7)     | 5.73(3.58,8.36)                | 8.24(5.14,11.93)   | 0.68(0.67,0.7)     |
| <b>Saint Lucia</b>                      | 103.51 (82.78, 129.18)              | 48.76(39.31,60.61)    | 0.68(0.66,0.7)     | 16.88(10.46,24.58)             | 7.86(4.86,11.35)   | 0.68(0.66,0.7)     |
| <b>Saint Vincent and the Grenadines</b> | 64.31 (51.09, 80.85)                | 49.19(39.35,61.11)    | 0.77(0.76,0.78)    | 10.41(6.45,15.46)              | 7.88(4.96,11.70)   | 0.77(0.76,0.78)    |
| <b>Samoa</b>                            | 246.14 (194.59, 306.33)             | 154.42(122.76,192.55) | 0.3(0.29,0.31)     | 40.38(25.20,58.68)             | 25.79(16.16,37.35) | 0.3(0.29,0.31)     |
| <b>San Marino</b>                       | 43.61 (34.62, 55.40)                | 84.31(67.29,106.72)   | 0.13(0.1,0.15)     | 10.85(6.72,15.90)              | 19.56(12.21,28.58) | 0.13(0.1,0.15)     |
| <b>Sao Tome and Principe</b>            | 120.09 (94.90, 149.64)              | 93.60(74.63,117.29)   | 0.35(0.34,0.36)    | 18.73(11.57,26.95)             | 15.15(9.46,22.13)  | 0.35(0.34,0.36)    |
| <b>Saudi Arabia</b>                     | 32,533.41 (24,732.31, 40,854.80)    | 114.21(91.42,143.53)  | 0.51(0.48,0.53)    | 4,995.51(3,195.57,7,188.30)    | 18.63(11.85,26.73) | 0.51(0.48,0.53)    |
| <b>Senegal</b>                          | 7,737.00 (6,159.62, 9,640.00)       | 88.91(70.93,111.99)   | 0.06(0.05,0.07)    | 1,198.01(750.78,1,743.13)      | 14.27(8.93,20.80)  | 0.06(0.05,0.07)    |
| <b>Serbia</b>                           | 8,710.07 (6,820.09, 11,155.74)      | 63.94(50.64,80.48)    | 0.38(0.37,0.38)    | 1,408.04(874.76,2,077.70)      | 10.11(6.24,14.96)  | 0.38(0.37,0.38)    |
| <b>Seychelles</b>                       | 159.07 (125.96, 200.36)             | 134.79(107.40,168.23) | 0.49(0.46,0.52)    | 26.29(16.26,37.89)             | 22.28(13.85,32.01) | 0.49(0.46,0.52)    |
| <b>Sierra Leone</b>                     | 3,878.69 (3,073.62, 4,823.31)       | 88.74(70.38,112.00)   | 0.19(0.18,0.2)     | 591.02(368.44,841.98)          | 14.16(8.77,20.18)  | 0.19(0.18,0.2)     |
| <b>Singapore</b>                        | 9,526.35 (7,507.72, 11,993.01)      | 118.25(94.48,148.49)  | 0.45(0.39,0.5)     | 1,972.42(1,227.64,2,891.74)    | 24.45(15.17,35.46) | 0.45(0.39,0.5)     |
| <b>Slovakia</b>                         | 5,270.78 (4,165.06, 6,761.15)       | 63.32(50.04,80.28)    | 0.36(0.35,0.37)    | 844.80(521.86,1,228.02)        | 9.99(6.20,14.51)   | 0.36(0.35,0.37)    |
| <b>Slovenia</b>                         | 2,304.55 (1,833.77, 2,919.17)       | 65.02(51.55,81.02)    | 0.55(0.54,0.56)    | 373.40(232.19,553.66)          | 10.28(6.44,15.04)  | 0.55(0.54,0.56)    |
| <b>Solomon Islands</b>                  | 544.41 (425.95, 679.79)             | 140.75(112.24,176.81) | 0.17(0.14,0.21)    | 84.32(52.90,122.92)            | 22.82(14.27,33.58) | 0.17(0.14,0.21)    |
| <b>Somalia</b>                          | 7,521.33 (5,885.50, 9,452.22)       | 85.62(67.97,109.35)   | 0.01(-0.01,0.03)   | 1,112.82(715.26,1,640.59)      | 13.48(8.44,19.89)  | 0.01(-0.01,0.03)   |
| <b>South Africa</b>                     | 56,883.76 (45,333.69, 71,787.15)    | 115.38(92.13,146.41)  | 0.21(0.19,0.23)    | 8,804.71(5,511.21,12,575.21)   | 18.22(11.47,26.27) | 0.21(0.19,0.23)    |
| <b>South Sudan</b>                      | 4,265.42 (3,361.66, 5,312.98)       | 93.09(74.15,117.08)   | 0.03(0,0.05)       | 646.46(400.12,941.91)          | 14.64(9.26,21.05)  | 0.03(0,0.05)       |
| <b>Spain</b>                            | 64,691.76 (51,405.27, 82,007.94)    | 84.89(67.77,106.65)   | 0.23(0.21,0.26)    | 15,987.26(10,134.74,23,207.37) | 19.52(12.45,28.44) | 0.23(0.21,0.26)    |
| <b>Sri Lanka</b>                        | 30,363.59 (23,969.01, 38,391.74)    | 119.41(95.43,150.86)  | 0.22(0.2,0.23)     | 4,955.84(3,135.38,7,274.88)    | 19.37(12.33,28.45) | 0.22(0.2,0.23)     |
| <b>Sudan</b>                            | 21,296.63 (16,848.98, 26,431.40)    | 93.76(74.76,119.36)   | 0.53(0.51,0.54)    | 3,288.38(2,103.90,4,821.31)    | 15.12(9.62,22.05)  | 0.53(0.51,0.54)    |
| <b>Suriname</b>                         | 301.62 (239.10, 377.57)             | 49.61(39.69,61.67)    | 0.61(0.59,0.62)    | 49.25(29.99,70.96)             | 8.03(4.95,11.57)   | 0.61(0.59,0.62)    |
| <b>Sweden</b>                           | 16,280.04 (12,803.10, 20,752.77)    | 93.53(74.66,117.77)   | -0.06(-0.08,-0.04) | 3,141.09(1,957.91,4,591.93)    | 16.94(10.59,24.56) | -0.06(-0.08,-0.04) |
| <b>Switzerland</b>                      | 11,555.97 (9,148.20, 14,786.92)     | 82.29(65.41,104.61)   | 0.2(0.15,0.25)     | 2,805.85(1,742.98,4,110.29)    | 18.68(11.41,27.31) | 0.2(0.15,0.25)     |
| <b>Syrian Arab Republic</b>             | 12,439.69 (9,830.39, 15,831.77)     | 94.14(74.96,119.20)   | 0.17(0.14,0.19)    | 2,002.73(1,243.09,2,926.46)    | 15.25(9.73,22.30)  | 0.17(0.14,0.19)    |
| <b>Taiwan (Province of China)</b>       | 65,549.54 (53,044.67, 80,475.12)    | 182.34(148.65,221.88) | 0.61(0.45,0.78)    | 12,276.25(7,982.29,17,548.02)  | 33.40(21.66,47.51) | 0.61(0.45,0.78)    |
| <b>Tajikistan</b>                       | 4,796.94 (3,724.06, 5,986.17)       | 75.39(60.00,93.63)    | 0.28(0.25,0.3)     | 741.70(449.74,1,111.28)        | 12.13(7.61,17.76)  | 0.28(0.25,0.3)     |
| <b>Thailand</b>                         | 130,593.26 (103,553.92, 165,513.69) | 131.71(105.00,165.93) | 0.52(0.48,0.56)    | 22,286.84(13,559.58,32,818.66) | 22.14(13.75,32.17) | 0.52(0.48,0.56)    |
| <b>Timor-Leste</b>                      | 1,023.00 (816.05, 1,281.16)         | 115.67(92.97,144.53)  | 0.21(0.19,0.22)    | 159.66(98.70,235.39)           | 18.46(11.43,27.24) | 0.21(0.19,0.22)    |
| <b>Togo</b>                             | 3,821.83 (2,977.78, 4,794.16)       | 82.96(66.15,103.94)   | 0.05(0.02,0.08)    | 585.60(364.70,855.42)          | 13.27(8.22,19.51)  | 0.05(0.02,0.08)    |
| <b>Tokelau</b>                          | 2.05 (1.63, 2.57)                   | 154.87(123.33,192.11) | 0.65(0.6,0.71)     | 0.34(0.21,0.49)                | 25.81(16.02,37.11) | 0.65(0.6,0.71)     |
| <b>Tonga</b>                            | 122.56 (97.74, 153.69)              | 148.93(119.21,187.08) | 0.31(0.3,0.33)     | 20.35(12.89,29.40)             | 24.94(15.70,36.14) | 0.31(0.3,0.33)     |
| <b>Trinidad and Tobago</b>              | 882.01 (698.77, 1,121.21)           | 50.13(39.86,62.51)    | 0.58(0.56,0.6)     | 144.40(91.14,210.81)           | 8.12(5.14,11.91)   | 0.58(0.56,0.6)     |
| <b>Tunisia</b>                          | 11,997.48 (9,508.16, 15,219.16)     | 92.21(73.40,116.64)   | 0.25(0.24,0.26)    | 1,935.65(1,196.43,2,794.57)    | 14.90(9.22,21.47)  | 0.25(0.24,0.26)    |
| <b>Turkey</b>                           | 88,711.14 (70,736.58, 111,000.20)   | 96.65(77.21,121.74)   | 0.28(0.25,0.31)    | 14,525.30(9,000.42,21,307.55)  | 15.89(9.91,23.32)  | 0.28(0.25,0.31)    |
| <b>Turkmenistan</b>                     | 3,609.65 (2,843.41, 4,556.80)       | 81.75(65.17,103.56)   | 0.45(0.44,0.47)    | 580.70(356.79,843.53)          | 13.41(8.25,19.29)  | 0.45(0.44,0.47)    |
| <b>Tuvalu</b>                           | 15.76 (12.44, 19.88)                | 147.55(117.37,184.44) | 0.63(0.61,0.65)    | 2.57(1.59,3.77)                | 24.36(15.17,35.69) | 0.63(0.61,0.65)    |

|                                           |                                         |                       |                    |                                   |                    |                    |
|-------------------------------------------|-----------------------------------------|-----------------------|--------------------|-----------------------------------|--------------------|--------------------|
| <b>Uganda</b>                             | 15,496.21 (12,265.03, 19,528.98)        | 87.45(69.81,111.21)   | 0.05(0.02,0.07)    | 2,331.50(1,441.27,3,453.37)       | 13.91(8.81,20.47)  | 0.05(0.02,0.07)    |
| <b>Ukraine</b>                            | 55,804.78 (44,189.23, 71,836.26)        | 81.31(64.64,103.12)   | 0.27(0.26,0.29)    | 8,852.46(5,623.68,13,168.91)      | 12.65(8.11,18.63)  | 0.27(0.26,0.29)    |
| <b>United Arab Emirates</b>               | 11,589.89 (8,465.92, 15,033.28)         | 125.67(100.74,157.93) | 0.57(0.54,0.6)     | 1,788.10(1,077.26,2,711.98)       | 20.54(12.91,29.95) | 0.57(0.54,0.6)     |
| <b>United Kingdom</b>                     | 95,850.45 (75,967.45, 121,310.02)       | 93.54(74.67,117.71)   | 0.33(0.3,0.35)     | 21,760.10(13,781.13,31,731.68)    | 19.96(12.69,28.69) | 0.33(0.3,0.35)     |
| <b>United Republic of Tanzania</b>        | 27,957.12 (22,276.85, 34,680.82)        | 95.37(76.64,119.49)   | 0.27(0.25,0.29)    | 4,329.46(2,708.85,6,339.51)       | 15.42(9.57,22.75)  | 0.27(0.25,0.29)    |
| <b>United States of America</b>           | 1,005,047.26 (829,731.62, 1,217,008.01) | 216.90(181.49,259.94) | 1.64(1.47,1.82)    | 258,422.82(171,072.39,356,152.60) | 53.00(34.95,73.61) | 1.64(1.47,1.82)    |
| <b>United States Virgin Islands</b>       | 79.86 (63.26, 100.72)                   | 52.37(41.91,64.29)    | 0.49(0.47,0.51)    | 13.49(8.43,19.86)                 | 8.64(5.54,12.52)   | 0.49(0.47,0.51)    |
| <b>Uruguay</b>                            | 6,063.09 (4,854.59, 7,695.46)           | 133.11(106.00,168.60) | 0.52(0.48,0.56)    | 1,361.09(853.70,1,964.41)         | 28.45(17.94,40.95) | 0.52(0.48,0.56)    |
| <b>Uzbekistan</b>                         | 20,782.52 (16,072.93, 26,090.70)        | 79.95(63.43,99.41)    | 0.46(0.45,0.48)    | 3,272.10(1,992.79,4,887.46)       | 13.01(8.15,19.28)  | 0.46(0.45,0.48)    |
| <b>Vanuatu</b>                            | 283.09 (223.46, 353.04)                 | 143.69(114.04,181.06) | 0.19(0.18,0.2)     | 44.94(27.72,64.97)                | 23.55(14.67,34.30) | 0.19(0.18,0.2)     |
| <b>Venezuela (Bolivarian Republic of)</b> | 10,300.01 (8,072.54, 12,920.82)         | 34.36(27.02,42.95)    | 0.61(0.6,0.62)     | 1,700.23(1,041.06,2,526.16)       | 5.63(3.49,8.33)    | 0.61(0.6,0.62)     |
| <b>Viet Nam</b>                           | 114,697.33 (90,595.28, 143,962.21)      | 111.07(89.07,138.89)  | 0.41(0.38,0.45)    | 18,428.47(11,463.52,27,232.07)    | 17.99(11.41,26.37) | 0.41(0.38,0.45)    |
| <b>Yemen</b>                              | 14,099.09 (11,239.15, 17,368.24)        | 84.10(67.44,104.79)   | 0.38(0.36,0.39)    | 2,132.57(1,349.30,3,134.05)       | 13.32(8.45,19.54)  | 0.38(0.36,0.39)    |
| <b>Zambia</b>                             | 8,122.99 (6,367.63, 10,135.20)          | 94.48(75.35,120.18)   | 0.1(0.08,0.13)     | 1,221.11(759.82,1,763.45)         | 15.08(9.32,21.94)  | 0.1(0.08,0.13)     |
| <b>Zimbabwe</b>                           | 7,892.75 (6,210.87, 9,940.01)           | 93.53(74.21,119.05)   | -0.07(-0.08,-0.05) | 1,194.79(740.42,1,739.86)         | 14.84(9.17,21.52)  | -0.07(-0.08,-0.05) |

**Table S13.** The DALYs for MSK disorders attributable to risk factors in 2019.

|                                     | <b>DALYs of Occupational risks<br/>(95% UI)</b> | <b>DALYs of Tobacco<br/>(95% UI)</b> | <b>DALYs of High body-mass index<br/>(95% UI)</b> | <b>DALYs of Kidney dysfunction<br/>(95% UI)</b> |
|-------------------------------------|-------------------------------------------------|--------------------------------------|---------------------------------------------------|-------------------------------------------------|
| <b>Global</b>                       | 15310680.99(10544903.69,20762409.4)             | 10287075.87(6603890.24,14386083.09)  | 7436785.81(3831189.19,12530764.96)                | 228946.9(144055.89,330401.73)                   |
| <b>Social-demographic index</b>     |                                                 |                                      |                                                   |                                                 |
| <b>Low</b>                          | 1935648.78(1326794.63,2609918.97)               | 421543.44(272814.66,591118.34)       | 292295.21(133409.49,522772.85)                    | 6119.33(3744.78,8851.64)                        |
| <b>Low middle</b>                   | 3322629.08(2290810.76,4512149.02)               | 1159495.02(764942.62,1619097.24)     | 843708.77(408155.18,1458827.52)                   | 20972.78(12953.69,30415.87)                     |
| <b>Middle</b>                       | 4847107.72(3332091.19,6611435.02)               | 2552014.31(1656065.25,3563398.64)    | 2064137.33(1020937.06,3509893.06)                 | 54941.63(33728.47,79820.6)                      |
| <b>Middle high</b>                  | 2741227.96(1884140.71,3762571.13)               | 2880297.64(1876206.2,4032690.73)     | 1938321.03(988810.36,3265539.16)                  | 47782.41(29353.36,69665.25)                     |
| <b>High</b>                         | 2455415.31(1711157.27,3302786.13)               | 3267842.29(2081316.82,4609683.07)    | 2293902.01(1225532.47,3757193.49)                 | 99042.07(63638.4,142656.12)                     |
| <b>Region</b>                       |                                                 |                                      |                                                   |                                                 |
| <b>Andean Latin America</b>         | 119029.19(82276.13,160877.3)                    | 25839.38(16329.74,36204.79)          | 68342.23(34886.21,115819.06)                      | 769.19(470.69,1129.84)                          |
| <b>Australasia</b>                  | 60569.94(42064.82911.6)                         | 73022.85(46507.42,104069.02)         | 72193.26(39344.79,115963.02)                      | 3884.22(2400.52,5677.95)                        |
| <b>Caribbean</b>                    | 67865.89(46545.19,91852.61)                     | 49823.15(32216.27,69705.04)          | 53887(28094.67,91279.44)                          | 634.52(395.9,919.57)                            |
| <b>Central Asia</b>                 | 229611.63(156144.06,313517.53)                  | 112965.32(72393.58,157777.11)        | 92318.07(49950.75,150958.86)                      | 1240.56(768.01,1863.88)                         |
| <b>Central Europe</b>               | 345570.13(238429.44,468487.79)                  | 473730.6(305463.29,661481.99)        | 263655.1(144824.84,423021.85)                     | 3148.87(1919.53,4699.29)                        |
| <b>Central Latin America</b>        | 406882.71(276975.26,550524.74)                  | 172984.38(110536.06,244000.79)       | 285803.29(143771.38,485597.97)                    | 2754.8(1712.06,4019.3)                          |
| <b>Central Sub-Saharan Africa</b>   | 214124.3(146857.33,292780.3)                    | 39698.73(25582.62,55992.35)          | 32207.37(14508.04,57629.13)                       | 511.97(312.2,767.35)                            |
| <b>East Asia</b>                    | 2982109.43(2072480.89,4116993.45)               | 1923895.36(1244101.62,2721682.78)    | 1175080.54(448280.72,2345720.76)                  | 49548.94(29983.01,72694.82)                     |
| <b>Eastern Europe</b>               | 447090.56(308973.38,612826.58)                  | 651140.03(420737.64,903051.5)        | 460593.72(256796.63,741589.22)                    | 6302.79(3875.07,9213.93)                        |
| <b>Eastern Sub-Saharan Africa</b>   | 797141.7(546035.8,1080567.64)                   | 137526.14(88262.69,194180.9)         | 109924.86(52562.69,192458.12)                     | 1673.39(1014.33,2429.56)                        |
| <b>High-income Asia Pacific</b>     | 503765(346852.31,689560.55)                     | 538736.84(343920.15,767401.73)       | 218485.94(74550.17,442614.17)                     | 18242.57(10979.98,26984.12)                     |
| <b>High-income North America</b>    | 980618.35(688309.05,1304797.1)                  | 1347845.42(843483.22,1913734.36)     | 1171821.99(659949.95,1835736.82)                  | 54408.28(35679.33,77263.61)                     |
| <b>North Africa and Middle East</b> | 1032454.14(701029.19,1416687.5)                 | 782108.36(486728.19,1113296.16)      | 722831.98(398626.63,1158672.6)                    | 14550.47(8890.99,21348.94)                      |
| <b>Oceania</b>                      | 24473.99(16380.27,33575.08)                     | 16038.69(10354.5,22518.52)           | 8251.36(3889.51,14424.73)                         | 153.65(92.65,226.93)                            |
| <b>South Asia</b>                   | 2551687.63(1758077.99,3482034.26)               | 876449.57(569546.43,1226050.58)      | 708274.82(336201.02,1253317.63)                   | 19381.19(11963.02,28332.67)                     |
| <b>Southeast Asia</b>               | 2040119.24(1386839.92,2769282.5)                | 900814.68(601169.21,1253497.23)      | 448508.7(222819.25,764495.24)                     | 15447.84(9495.68,22564.23)                      |
| <b>Southern Latin America</b>       | 111210.07(75214.97,151588.3)                    | 137841.36(88841.07,193995.23)        | 96872.92(48717.24,165540.62)                      | 3720.37(2265.06,5525.63)                        |
| <b>Southern Sub-Saharan Africa</b>  | 95119.91(65206.4,128914.2)                      | 58641.14(38671.88,81801.96)          | 72069.55(41385.44,116211.19)                      | 1390.19(844.74,2038.18)                         |
| <b>Tropical Latin America</b>       | 496242.78(344078.26,691130.08)                  | 324111.57(209018.11,459221.28)       | 304111.47(164769.12,501528.78)                    | 2825.18(1759.58,4079.51)                        |
| <b>Western Europe</b>               | 923135.74(633503.22,1263647.29)                 | 1517668.14(981135.87,2140872.96)     | 883659.55(446918.02,1488527.35)                   | 25790.22(15696.26,38537.89)                     |
| <b>Western Sub-Saharan Africa</b>   | 881858.67(603811.25,1202541.85)                 | 126194.15(79874.19,177276.47)        | 187892.07(95217.18,320896.14)                     | 2567.72(1561.28,3717.91)                        |

**Figure S1.** Age-standardized incidence (A), death (B), and DALY (C) rates (per 100,000 population) in global and five SDI quintiles from 1990 to 2019

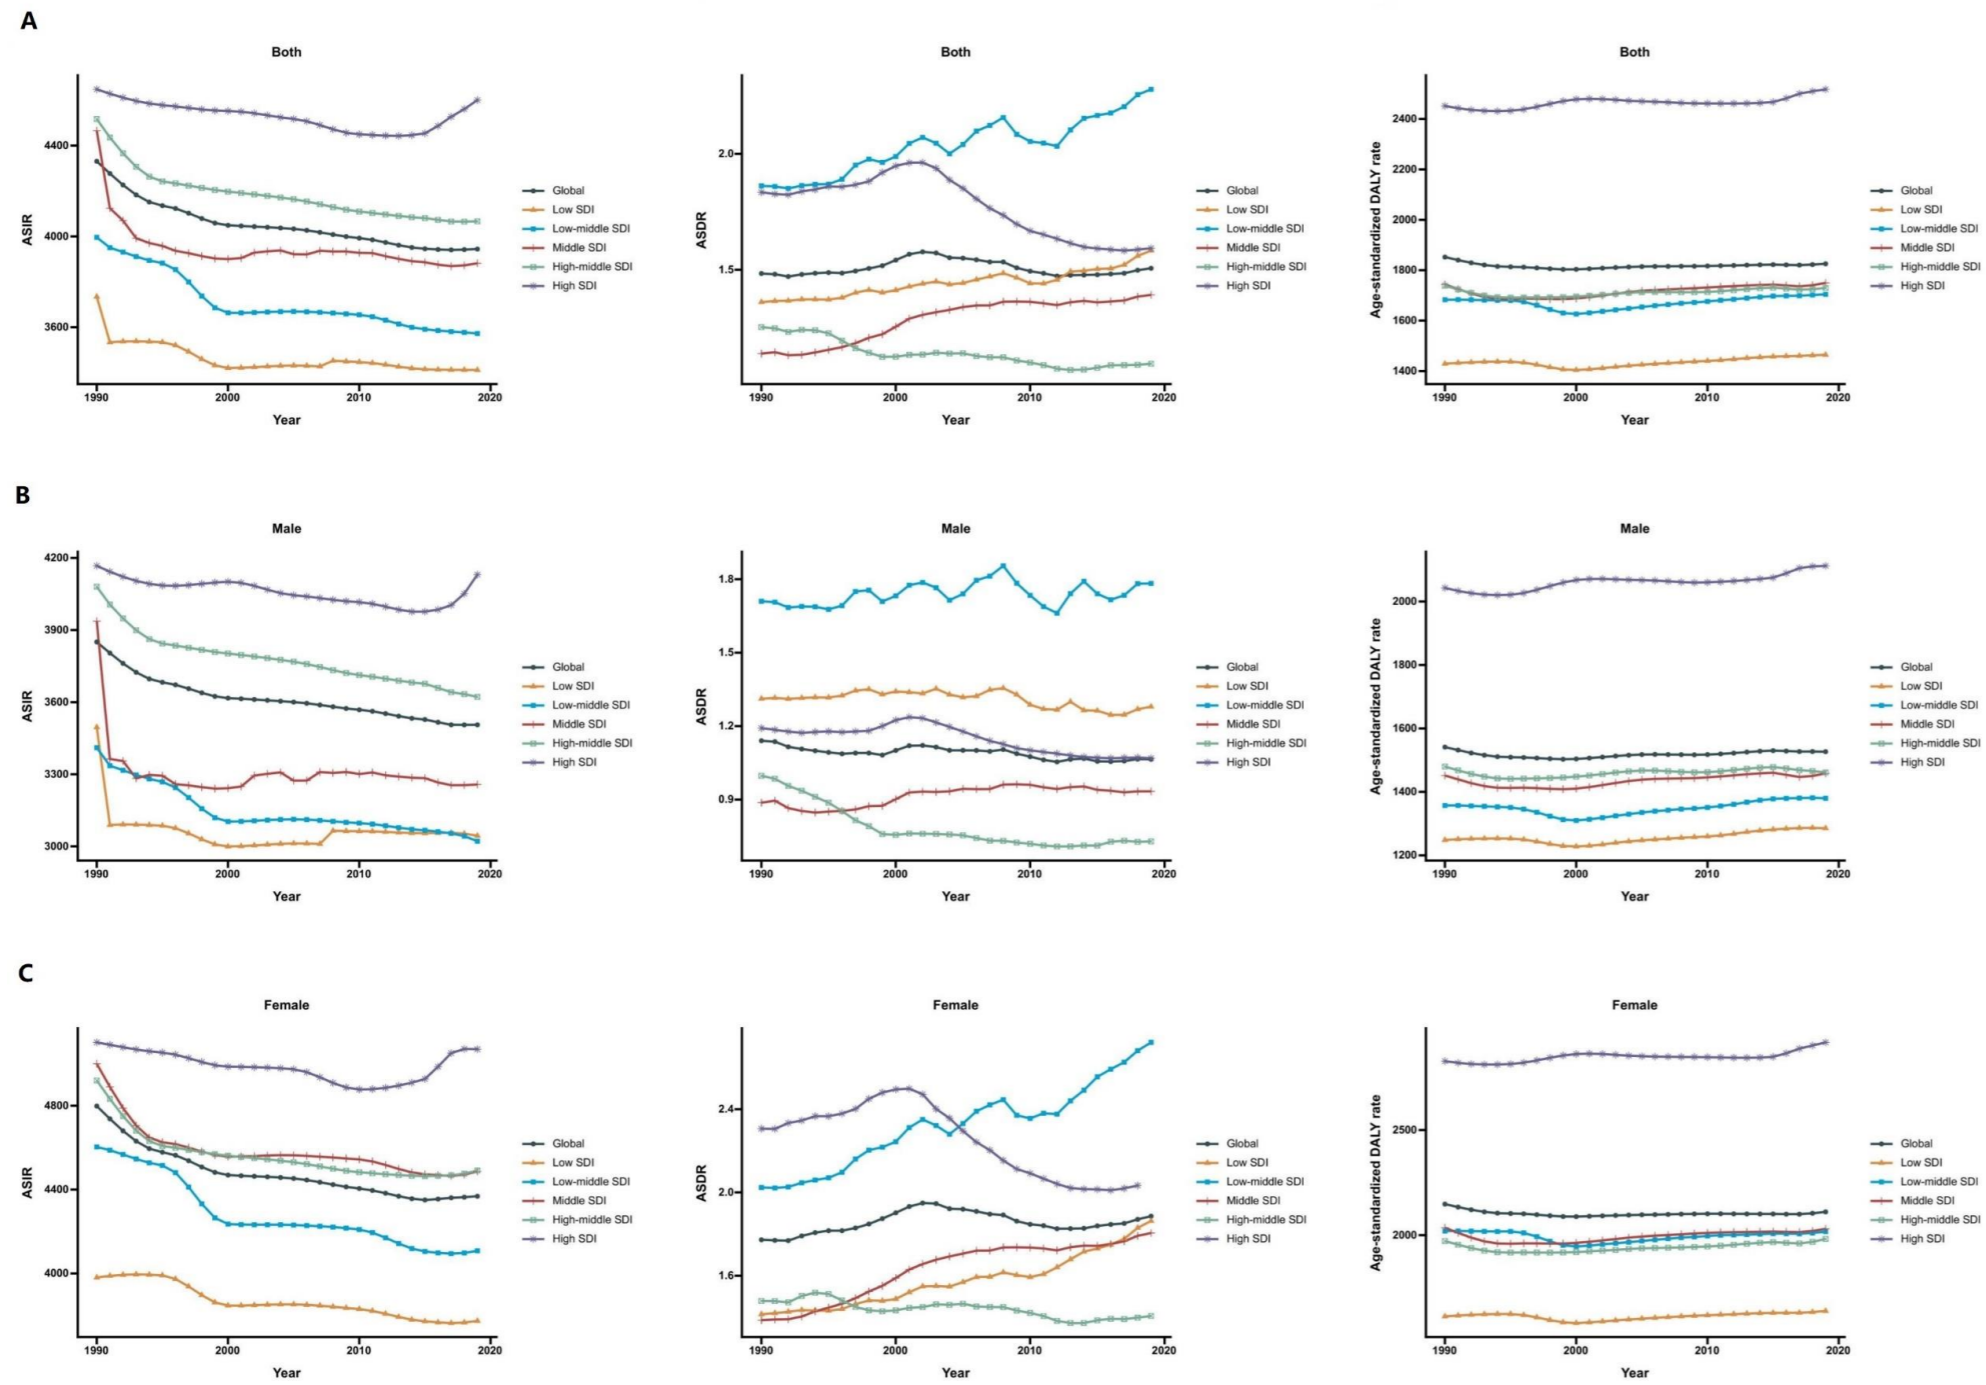



**Figure S2.** The correlation of ASIR (A), ASDR (B), age-standardized DALY rate (C) (per 100,000 population) with SDI value in 21 regions from 1990 to 2019

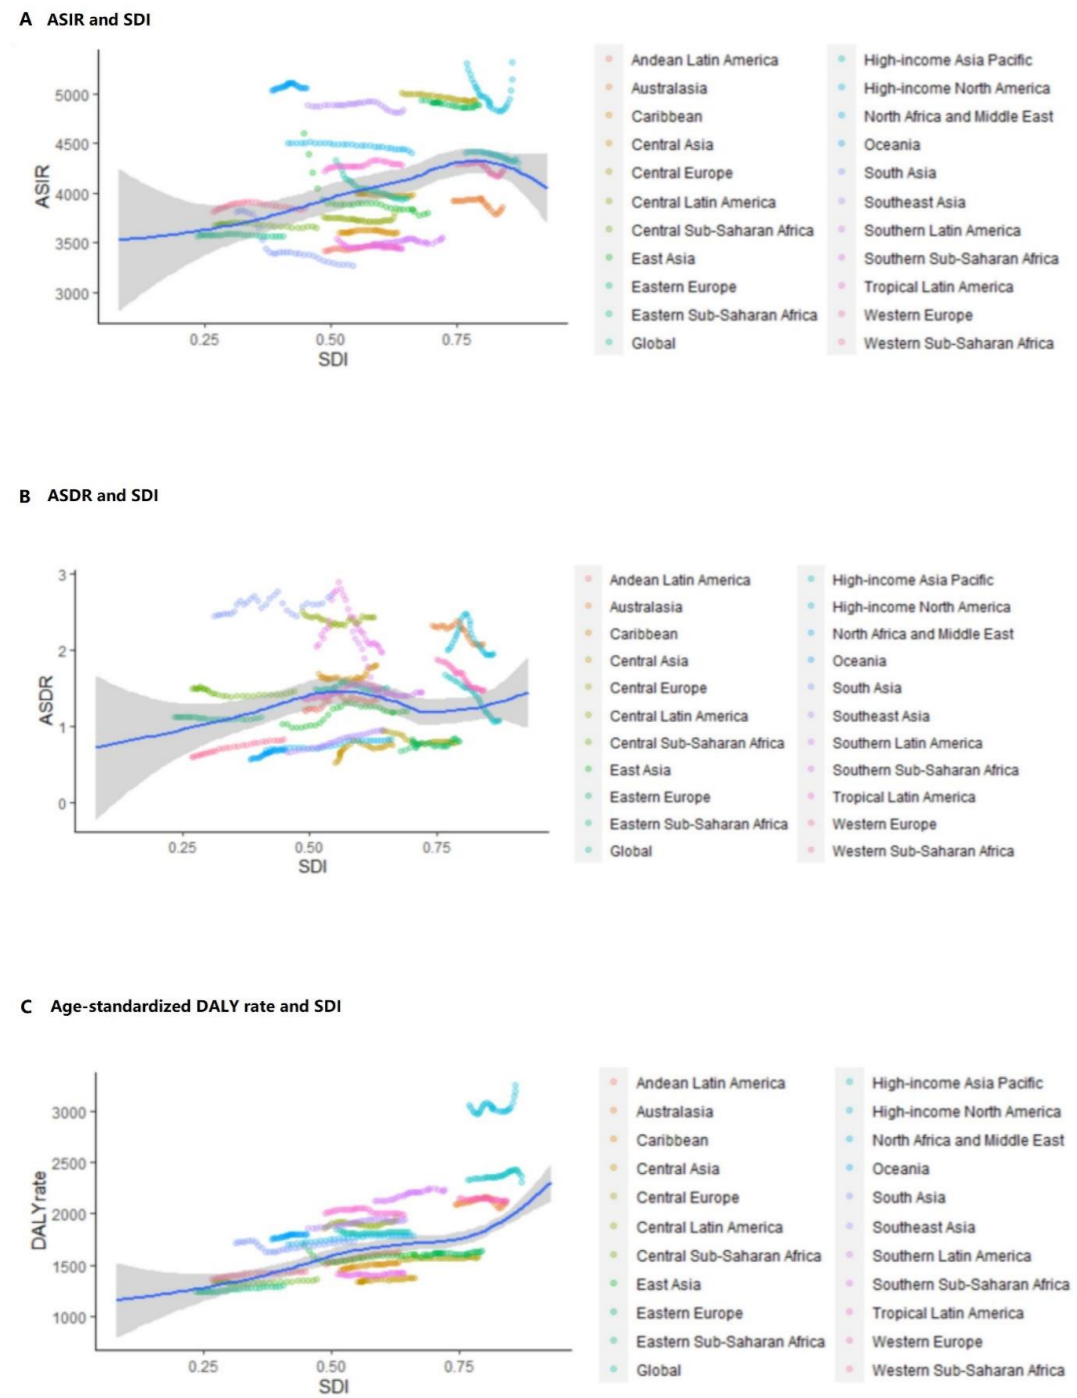



**Figure S3.** The correlation of ASIR (A), ASDR (B), age-standardized DALY rate (C) (per 100,000 population) with SDI value in 204 countries in 2019. The size of circle indicates the number of cases and one circle represents a specific country.

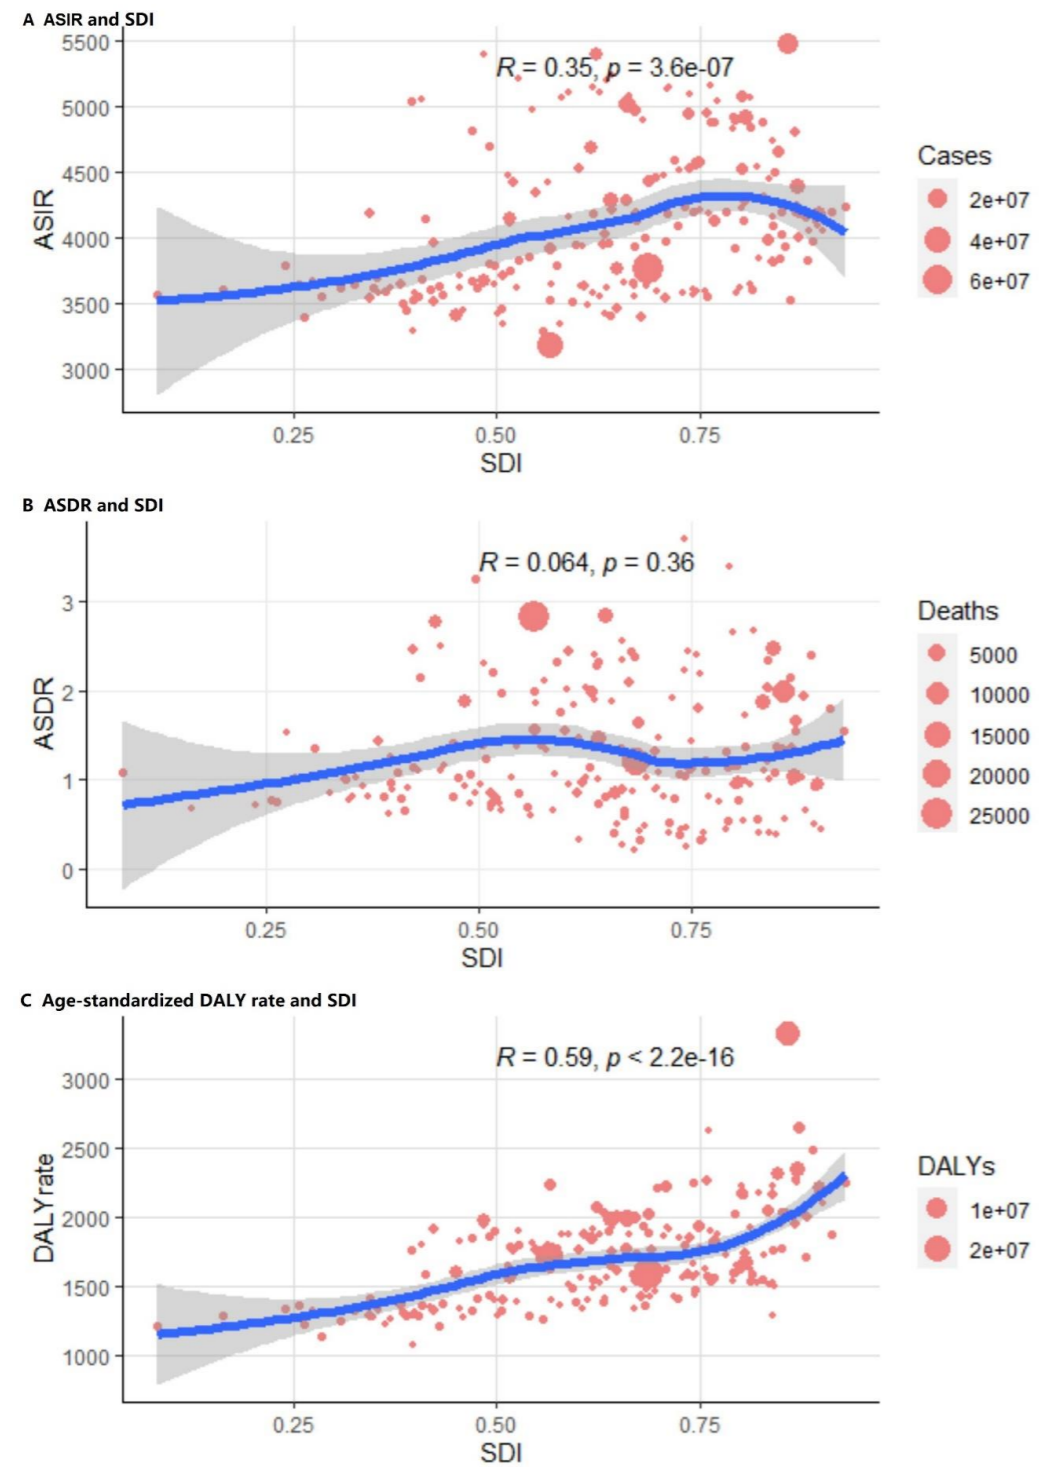

**Figure S4.** The percentage change in age-standardized rates for MSK disorders of Worldwide between 1990 and 2019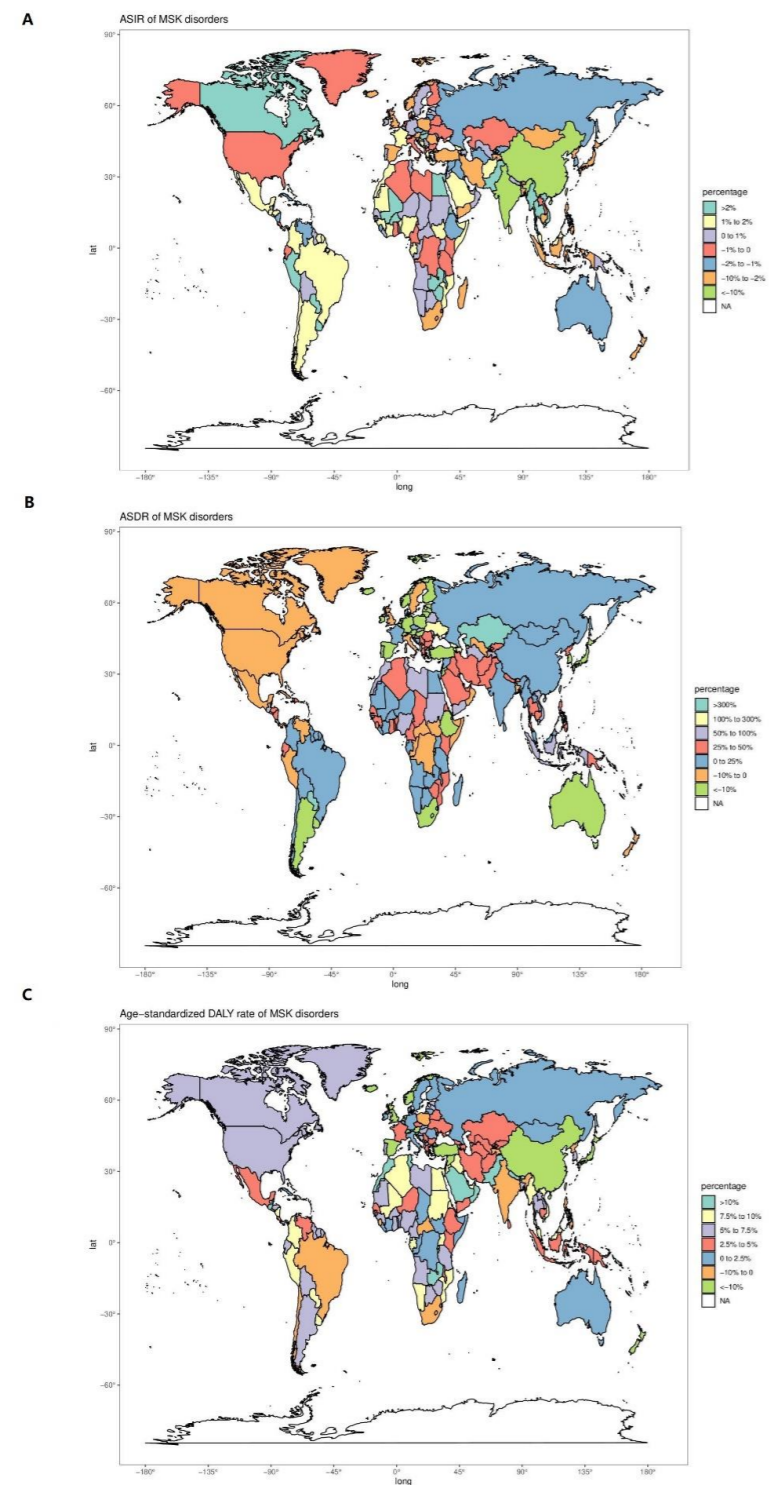

Age-standardized incidence rate (ASIR) (A), age-standardized death rate (ASDR) (B), and age-standardized DALY rate (AS DALY) (C)

**Figure S5.** The number of incident cases (A), deaths (B), DALYs (C) of five common conditions by gender and age groups in 2019

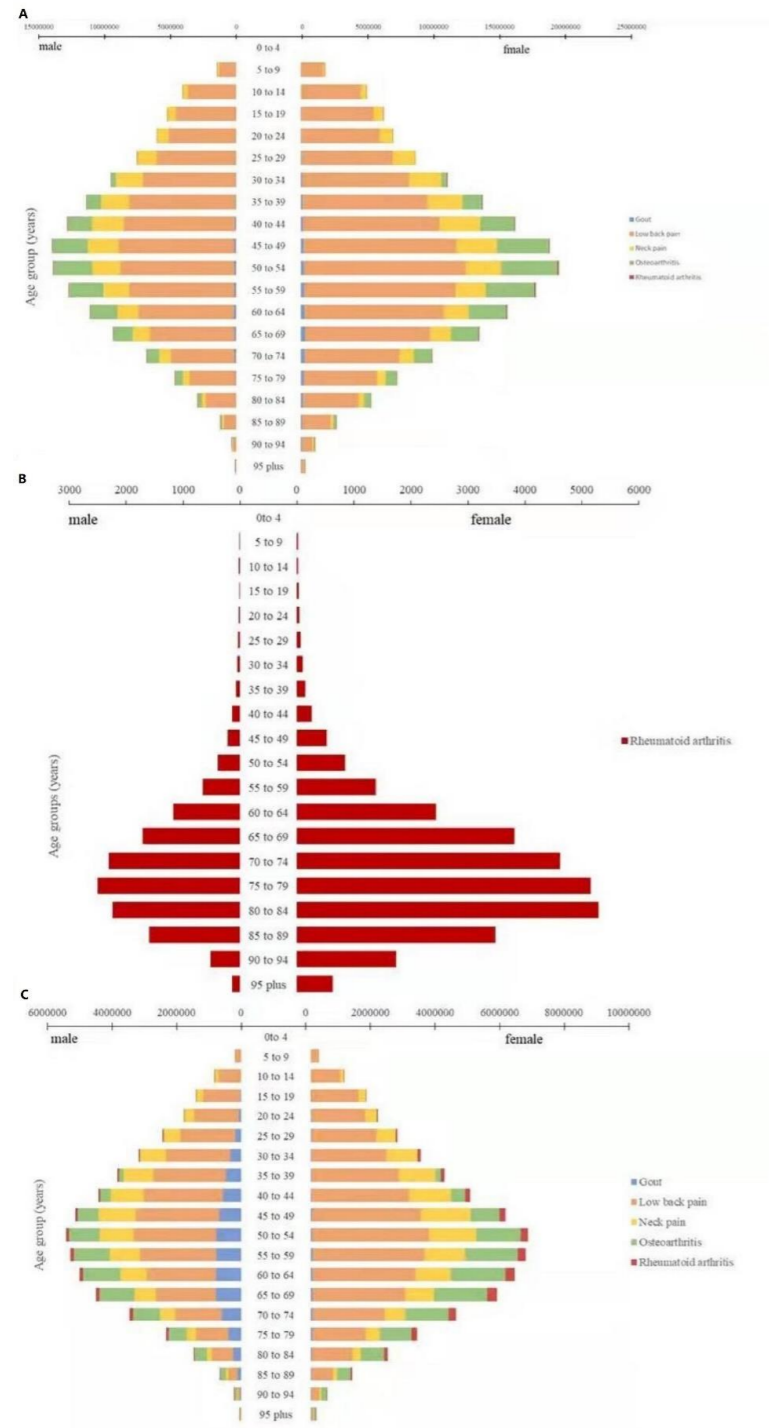

**Figure S6.** The AAPC of age-standardized rates for MSK disorders of Worldwide from 1990 to 2019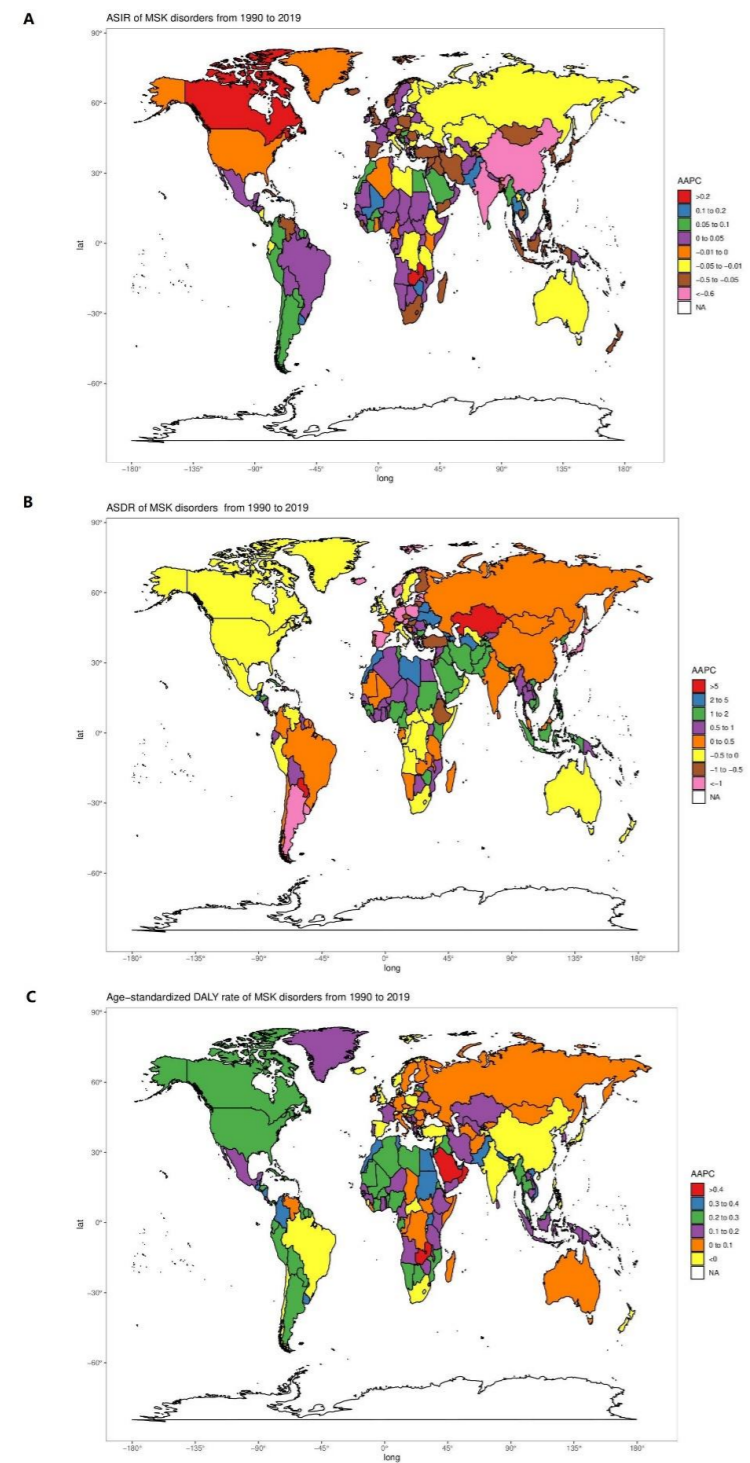

Age-standardized incidence rate (ASIR) (A), age-standardized death rate (ASDR) (B), and age-standardized DALY rate (AS DALY) (C)

**Figure S7.** The age-standardized DALY rate (per 100,000 population) for RA (A), OA (B), LBP (C) and gout (D) attributable to risk factors from 1990 to 2019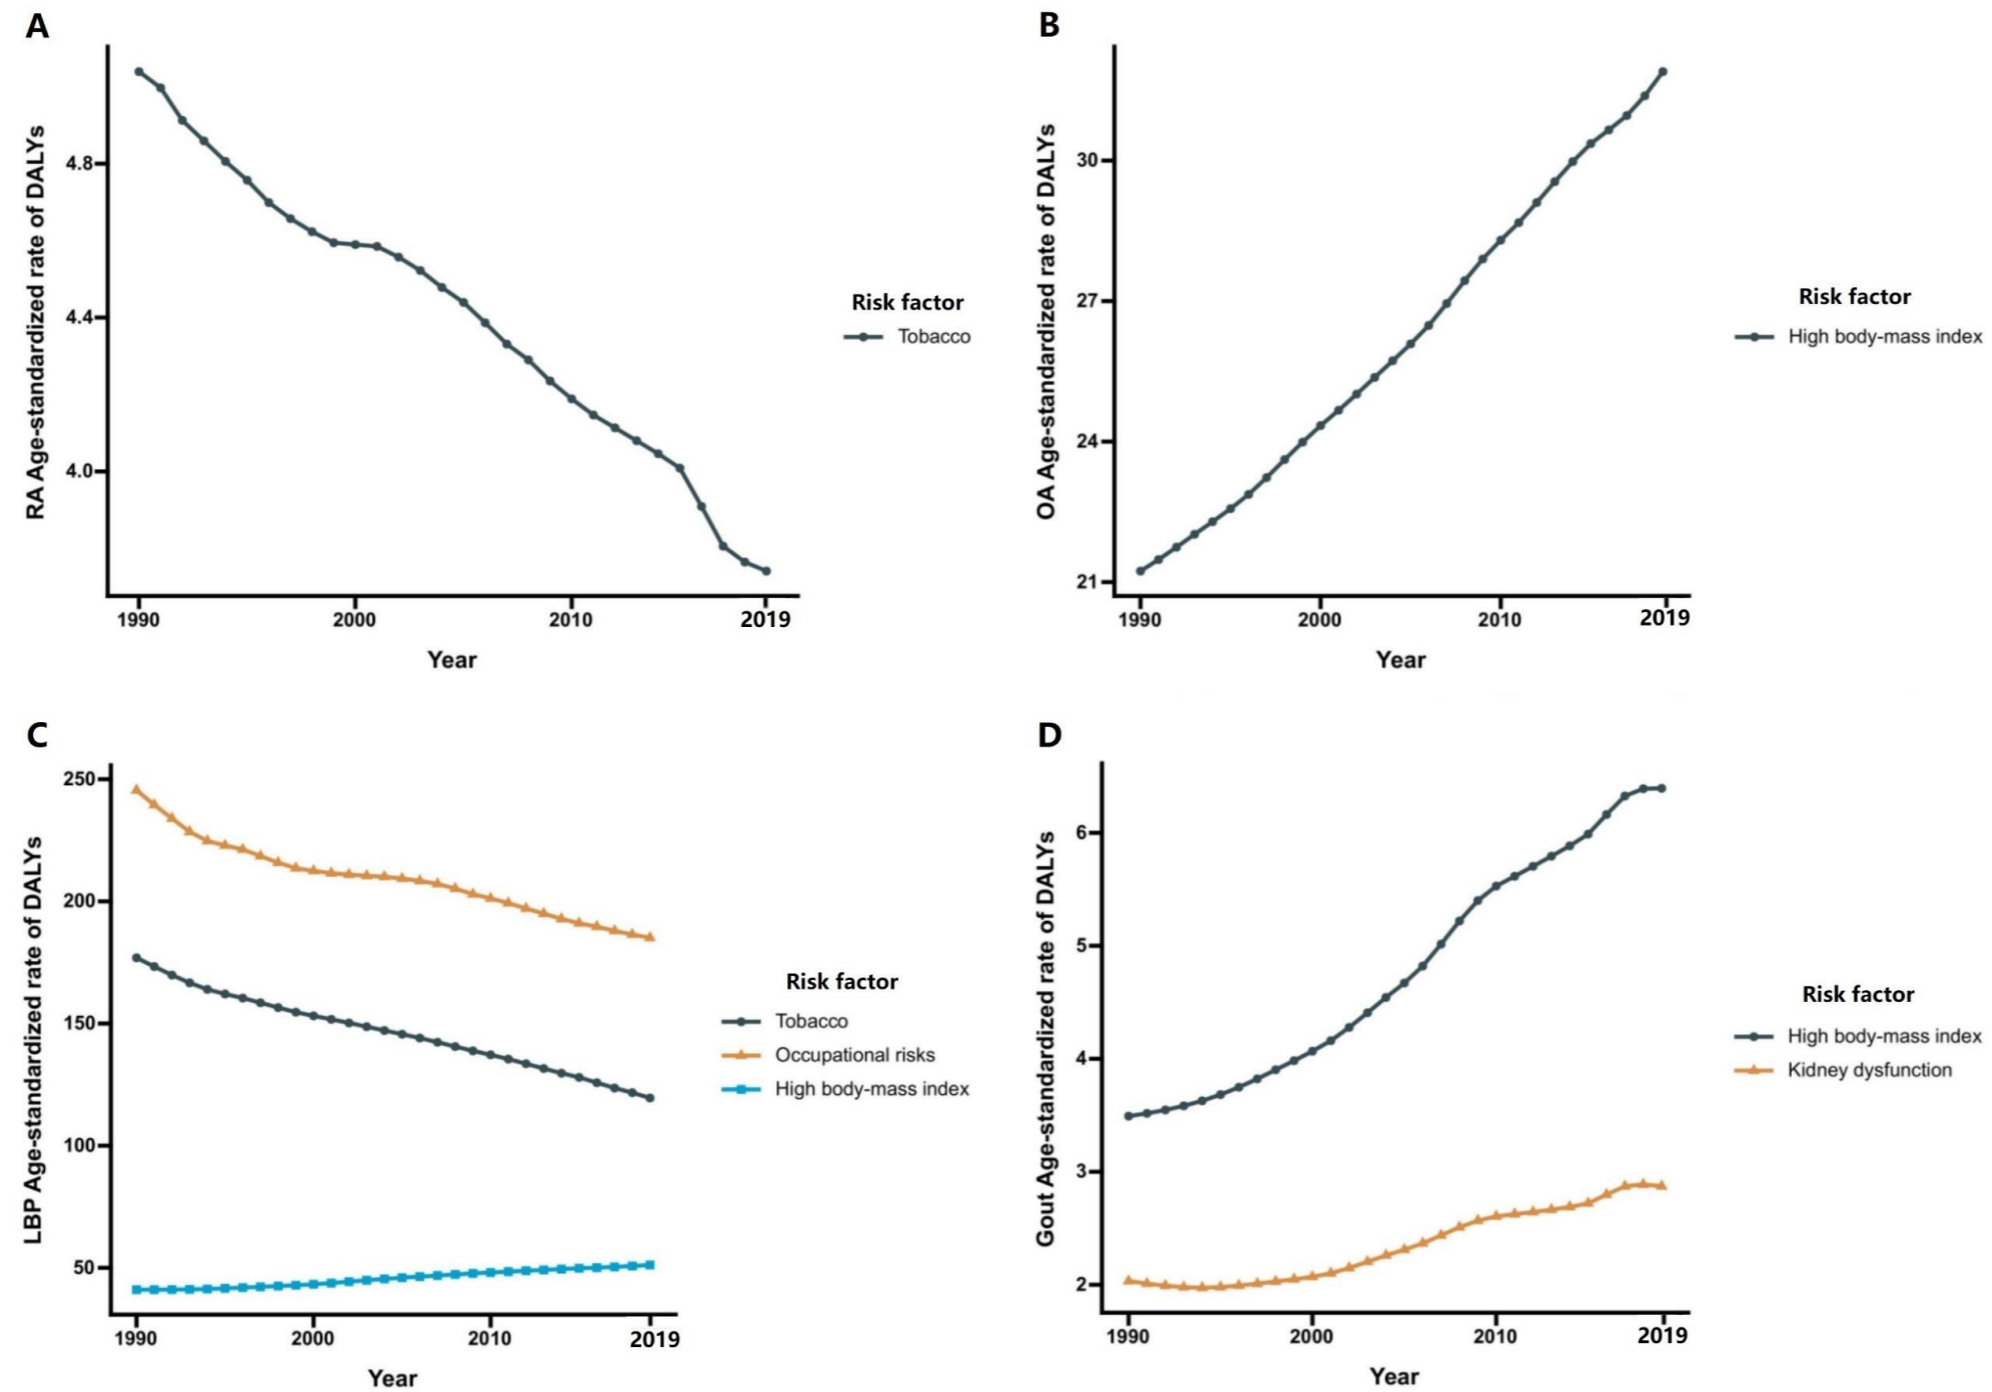

Supplement: bmjopen-2022-062183supp001.pdf [file bmjopen-2022-062183supp001.pdf]
